# Supplementary material for: Machine-learning guided prediction of thermoelectric properties of topological insulator Bi2Te3−xSex
Source: Royal Society of Chemistry journal article supplement (doi:10.1039/d4tc01058b), 2024-01-01
Supplement: d4tc01058b1.pdf [file d4tc01058b1.pdf]

## Supporting Information

# Machine-Learning Guided Prediction of Thermoelectric Properties of Topological Insulator $\text{Bi}_2\text{Te}_{3-x}\text{Se}_x$

Vipin K E<sup>1</sup> and Prahallad Padhan<sup>1,2</sup>

*<sup>1</sup>Department of Physics, Nanoscale Physics Laboratory, Indian Institute of Technology Madras, Chennai 600036, India*

*<sup>2</sup>Functional Oxides Research Group, Indian Institute of Technology Madras, Chennai 600036, India*

AUTHOR INFORMATION :

Corresponding Author :

[Padhan@iitm.ac.in](mailto:Padhan@iitm.ac.in)

Table - S1 : Seebeck coefficient, electrical conductivity, thermal conductivity, and figure of merit of various compounds measured at different temperatures (Training data).

| Formula                                                                             | T(K) | S( $\mu$ V/K) | $\sigma$ (S/m) | $\kappa$ (W/Km) | ZT    |
|-------------------------------------------------------------------------------------|------|---------------|----------------|-----------------|-------|
| BiSb(Se <sub>0.94</sub> Br <sub>0.06</sub> ) <sub>3</sub>                           | 500  | -169.00       | 19362.00       | 0.530           | 0.522 |
| Mg <sub>3.5</sub> Ho <sub>0.04</sub> Sb <sub>2</sub>                                | 500  | -267.96       | 15290.00       | 0.971           | 0.565 |
| Cu <sub>1.95</sub> In <sub>0.05</sub> Se                                            | 374  | 218.91        | 12162.00       | 1.200           | 0.200 |
| Ge <sub>0.87</sub> In <sub>0.05</sub> Pb <sub>0.08</sub> Te                         | 550  | 216.47        | 53241.00       | 1.226           | 1.119 |
| Ta <sub>0.98</sub> Ti <sub>0.02</sub> FeSb                                          | 370  | 207.60        | 49000.00       | 7.725           | 0.101 |
| AgSb <sub>0.93</sub> Mn <sub>0.07</sub> Te <sub>2</sub>                             | 491  | 119.47        | 84324.00       | 1.207           | 0.490 |
| Li <sub>1.04</sub> Co <sub>0.85</sub> Ni <sub>0.15</sub> O <sub>2</sub>             | 1023 | 246.00        | 506.64         | 0.875           | 0.036 |
| (Zn <sub>0.98</sub> In <sub>0.02</sub> ) <sub>4</sub> Sb <sub>3</sub>               | 323  | 135.00        | 38540.00       | 0.842           | 0.269 |
| SnS <sub>0.94</sub> Se <sub>0.06</sub>                                              | 873  | 382.00        | 6730.00        | 0.670           | 1.250 |
| Bi <sub>2</sub> Te <sub>3</sub>                                                     | 458  | -155.03       | 83333.00       | 0.868           | 1.038 |
| BiSb(Se <sub>0.98</sub> Br <sub>0.02</sub> ) <sub>3</sub>                           | 800  | -229.00       | 12128.00       | 0.480           | 1.060 |
| Sn <sub>0.98</sub> Pb <sub>0.01</sub> Zn <sub>0.01</sub> Se                         | 373  | 460.71        | 3000.00        | 1.081           | 0.220 |
| Gd <sub>2.84</sub> Se <sub>4</sub>                                                  | 750  | -126.50       | 23040.00       | 1.257           | 0.220 |
| Ag <sub>0.5</sub> Sb <sub>1.1</sub> Pb <sub>19.6</sub> Te <sub>18.8</sub>           | 473  | -14.40        | 29250.00       | 1.555           | 0.002 |
| CuAgTe <sub>0.6</sub> Se <sub>0.4</sub>                                             | 363  | 222.28        | 8671.00        | 0.388           | 0.401 |
| AgSbTe <sub>2</sub>                                                                 | 439  | 137.02        | 33533.00       | 1.039           | 0.266 |
| Mg <sub>3</sub> Sb <sub>1.9</sub> Bi <sub>0.1</sub>                                 | 565  | 364.00        | 690.00         | 0.770           | 0.067 |
| Ag <sub>8</sub> Sn <sub>0.4</sub> Ga <sub>0.6</sub> Se <sub>6</sub>                 | 328  | -552.34       | 33.00          | 0.211           | 0.016 |
| (CaZn <sub>0.4</sub> Ag <sub>0.2</sub> Sb) <sub>0.91</sub> (LiZnSb) <sub>0.09</sub> | 573  | 167.90        | 26585.00       | 0.797           | 0.539 |
| Cu <sub>3</sub> P <sub>0.6</sub> Ge <sub>0.4</sub> S <sub>4</sub>                   | 400  | 65.00         | 89800.00       | 1.582           | 0.096 |
| (Cu <sub>0.004</sub> Pb <sub>0.996</sub> Te)(MnTe) <sub>0.03</sub>                  | 823  | -184.39       | 51034.00       | 1.379           | 1.036 |
| Eu <sub>2</sub> Zn <sub>0.98</sub> Sb <sub>2</sub>                                  | 300  | 142.00        | 18000.00       | 0.500           | 0.218 |
| Bi <sub>1.92</sub> Nb <sub>0.08</sub> Te <sub>3</sub>                               | 478  | -120.53       | 104026.00      | 0.794           | 0.910 |
| Cu <sub>0.9</sub> Pd <sub>0.1</sub> FeS <sub>2</sub>                                | 100  | -73.28        | 52330.00       | 10.680          | 0.003 |
| Cd <sub>2</sub> Cu <sub>3</sub> In <sub>3</sub> Te <sub>8</sub>                     | 575  | 216.00        | 9100.00        | 0.980           | 0.249 |
| BiSb(Se <sub>0.96</sub> Br <sub>0.04</sub> ) <sub>3</sub>                           | 600  | -192.00       | 14630.00       | 0.530           | 0.630 |
| EuCd <sub>2</sub> Sb <sub>2</sub>                                                   | 500  | 301.00        | 7658.00        | 0.874           | 0.397 |
| BaCu <sub>3.96</sub> S <sub>3.0</sub>                                               | 700  | 129.00        | 14795.00       | 0.833           | 0.207 |
| Ca <sub>1.55</sub> Yb <sub>3.45</sub> Al <sub>2</sub> Sb <sub>6</sub>               | 702  | 159.12        | 2994.00        | 0.933           | 0.057 |

|                                                                                |      |         |           |        |       |
|--------------------------------------------------------------------------------|------|---------|-----------|--------|-------|
| YbCd <sub>1.6</sub> Zn <sub>0.4</sub> Sb <sub>2</sub>                          | 550  | 175.51  | 57600.00  | 1.308  | 0.800 |
| Sr <sub>14.5</sub> Ga <sub>29.2</sub> Ge <sub>56.3</sub>                       | 669  | -156.10 | 50350.00  | 1.678  | 0.489 |
| Ge <sub>0.55</sub> Pb <sub>0.45</sub> Te <sub>0.8</sub> Se <sub>0.2</sub>      | 300  | 82.61   | 37975.00  | 1.028  | 0.100 |
| Ta <sub>0.96</sub> Ti <sub>0.04</sub> FeSb                                     | 370  | 194.48  | 80100.00  | 6.365  | 0.178 |
| SnTe <sub>0.1</sub> AgSbSe <sub>2</sub>                                        | 650  | 124.85  | 96644.00  | 1.973  | 0.496 |
| Cu <sub>2.2</sub> Sn <sub>0.8</sub> Sb <sub>0.2</sub> Se <sub>3.2</sub>        | 372  | 56.00   | 191450.00 | 3.270  | 0.068 |
| LaCo <sub>0.9</sub> Ni <sub>0.1</sub> O <sub>3</sub>                           | 300  | 265.00  | 1518.00   | 0.425  | 0.072 |
| (Zn <sub>0.9</sub> In <sub>0.1</sub> ) <sub>4</sub> Sb <sub>3</sub>            | 423  | 187.50  | 13143.00  | 0.820  | 0.238 |
| Cd <sub>2</sub> Cu <sub>3</sub> In <sub>3</sub> Te <sub>8</sub>                | 335  | 148.40  | 18310.00  | 1.923  | 0.070 |
| Mg <sub>3.5</sub> Ho <sub>0.02</sub> Sb <sub>2</sub>                           | 500  | -289.36 | 10129.00  | 0.926  | 0.458 |
| GeSe <sub>0.95</sub> Te <sub>0.05</sub>                                        | 778  | 470.62  | 800.00    | 0.631  | 0.218 |
| ZrNiPb <sub>0.92</sub> Sn <sub>0.6</sub> Bi <sub>0.02</sub>                    | 771  | -161.70 | 196761.00 | 5.900  | 0.672 |
| Ag <sub>0.97</sub> Cr <sub>0.95</sub> Sb <sub>0.05</sub> Se <sub>2</sub>       | 603  | 135.81  | 10491.00  | 0.485  | 0.240 |
| FeNb <sub>0.96</sub> Ti <sub>0.04</sub> Sb                                     | 900  | 284.00  | 42000.00  | 6.430  | 0.474 |
| Tb <sub>0.03</sub> Co <sub>4</sub> Sb <sub>12</sub>                            | 600  | -280    | 30100.00  | 2.900  | 0.400 |
| Yb <sub>10</sub> LaCdSb <sub>9</sub>                                           | 573  | 48.55   | 27725.00  | 0.856  | 0.044 |
| Tl <sub>9.0</sub> Bi <sub>0.97</sub> Te <sub>6.0</sub>                         | 503  | 216.50  | 18455.00  | 0.450  | 0.967 |
| Cu <sub>3.0</sub> SbSe <sub>4</sub>                                            | 323  | 497.00  | 2394.00   | 2.420  | 0.079 |
| AgBiSe <sub>2.0</sub>                                                          | 514  | -177.00 | 13400.00  | 0.710  | 0.304 |
| AgBi <sub>0.9</sub> Sb <sub>0.1</sub> Se <sub>2</sub>                          | 600  | -59.90  | 236.00    | 0.335  | 0.002 |
| Zn <sub>0.9</sub> Cd <sub>0.1</sub> Sc <sub>0.01</sub> O <sub>1.015</sub>      | 473  | -92.00  | 53542.00  | 5.700  | 0.038 |
| Cu <sub>7</sub> P(S <sub>0.55</sub> Se <sub>0.45</sub> ) <sub>6</sub>          | 623  | 286.00  | 1926.00   | 0.223  | 0.440 |
| Sn <sub>0.92</sub> Ge <sub>0.04</sub> As <sub>0.04</sub> Te                    | 328  | 37.47   | 786420.00 | 7.477  | 0.106 |
| K <sub>0.45</sub> Co <sub>4</sub> Sb <sub>12</sub>                             | 300  | -106    | 273000.00 | 4.500  | 0.200 |
| In <sub>0.005</sub> Pb <sub>0.995</sub> Te <sub>0.998</sub> l <sub>0.002</sub> | 428  | -231.50 | 28100.00  | 1.530  | 0.421 |
| Co <sub>9</sub> S <sub>8</sub>                                                 | 250  | -15.00  | 1666700   | 11.280 | 0.008 |
| (SnTe) <sub>10</sub> Sb <sub>2</sub> Te <sub>3</sub>                           | 523  | 135.54  | 117848.00 | 1.900  | 0.596 |
| Hf <sub>0.7</sub> Ti <sub>0.3</sub> CoSb <sub>0.8</sub> Sn <sub>0.2</sub>      | 1088 | 232.00  | 47600.00  | 2.895  | 0.963 |
| Pb <sub>0.995</sub> Zn <sub>0.02</sub> Te                                      | 724  | -287.60 | 24420.00  | 1.111  | 1.317 |
| Ag <sub>2.0</sub> Se <sub>0.5</sub> Te <sub>0.5</sub>                          | 315  | -92.76  | 63400.00  | 0.632  | 0.272 |
| Mg <sub>2</sub> Cu <sub>3</sub> In <sub>3</sub> Te <sub>8</sub>                | 770  | 267.00  | 7700.00   | 1.000  | 0.426 |
| Yb <sub>13.6</sub> Ce <sub>0.363</sub> Mn <sub>0.99</sub> Sb <sub>11.05</sub>  | 473  | 87.94   | 37828.00  | 0.874  | 0.158 |
| Ag <sub>0.97</sub> Cr <sub>0.97</sub> Bi <sub>0.03</sub> Se <sub>2</sub>       | 503  | 105.93  | 15260.00  | 0.409  | 0.211 |

|                                                                                               |      |         |           |        |       |
|-----------------------------------------------------------------------------------------------|------|---------|-----------|--------|-------|
| SnSe <sub>0.9</sub> S <sub>0.1</sub>                                                          | 373  | 225.00  | 1515.00   | 1.169  | 0.022 |
| Sr <sub>14.8</sub> Ga <sub>28.6</sub> Ge <sub>56.6</sub>                                      | 711  | -124.30 | 65608.00  | 2.232  | 0.323 |
| Mg <sub>2.9875</sub> Na <sub>0.0125</sub> Sb <sub>2</sub>                                     | 473  | 134.00  | 29134.00  | 1.300  | 0.190 |
| Cu <sub>3</sub> Sb <sub>0.975</sub> Ge <sub>0.025</sub> S <sub>4</sub>                        | 373  | 308.00  | 5210.00   | 1.506  | 0.122 |
| Eu <sub>2</sub> Zn <sub>0.98</sub> Sb <sub>2</sub>                                            | 723  | 235.00  | 10408.00  | 0.448  | 0.940 |
| S <sub>0.08</sub> Pd <sub>0.20</sub> Co <sub>3.80</sub> Sb <sub>12.04</sub>                   | 300  | -212    | 59400.00  | 2.900  | 0.200 |
| Sn <sub>0.91</sub> Mn <sub>0.09</sub> Te                                                      | 331  | 58.98   | 300000.00 | 3.934  | 0.088 |
| AgCuTe                                                                                        | 623  | 252.23  | 9320.00   | 0.519  | 0.712 |
| In <sub>0.005</sub> Pb <sub>0.995</sub> Te <sub>0.996</sub> l <sub>0.004</sub>                | 378  | -191.02 | 49400.00  | 1.828  | 0.380 |
| In <sub>3.94</sub> Pb <sub>0.06</sub> Se <sub>3</sub>                                         | 330  | -200.00 | 7300.00   | 1.520  | 0.063 |
| Zn <sub>0.875</sub> Cd <sub>0.125</sub> Sc <sub>0.02</sub> O <sub>1.03</sub>                  | 573  | -101.00 | 35570.00  | 4.250  | 0.049 |
| Ge <sub>0.55</sub> Sb <sub>0.25</sub> Te <sub>0.8</sub> (AgSnSe <sub>2</sub> ) <sub>0.2</sub> | 523  | 215.53  | 27750.00  | 0.720  | 0.966 |
| Rb <sub>2</sub> Bi <sub>8</sub> Se <sub>12.9805</sub> Cl <sub>0.0195</sub>                    | 526  | -147.42 | 9412.00   | 0.648  | 0.166 |
| SnAgSbSe <sub>2</sub>                                                                         | 650  | 71.30   | 236200.00 | 4.662  | 0.167 |
| TlCr <sub>5</sub> Se <sub>8</sub>                                                             | 323  | 226.00  | 6670.00   | 0.706  | 0.156 |
| AgCuTe <sub>0.6</sub> Se <sub>0.4</sub>                                                       | 623  | 251.40  | 7184.00   | 0.504  | 0.562 |
| Gd <sub>2.79</sub> Se <sub>4</sub>                                                            | 350  | -65.60  | 19310.00  | 1.294  | 0.022 |
| Cu <sub>10.5</sub> Ni <sub>1.5</sub> Sb <sub>4</sub> S <sub>13</sub>                          | 420  | 157.00  | 21000.00  | 0.675  | 0.324 |
| Sr <sub>0.21</sub> Co <sub>4</sub> Sb <sub>12.25</sub>                                        | 300  | -126.00 | 240000.00 | 4.870  | 0.235 |
| In <sub>3.94</sub> Pb <sub>0.06</sub> Se <sub>3</sub>                                         | 405  | -220.00 | 7800.00   | 1.345  | 0.114 |
| Ca <sub>1.11</sub> Yb <sub>3.89</sub> Al <sub>2</sub> Sb <sub>5.77</sub> Ge <sub>0.23</sub>   | 614  | 59.90   | 23692.00  | 1.896  | 0.028 |
| Mg <sub>2</sub> Sn <sub>0.995</sub> Sb <sub>0.005</sub>                                       | 646  | -187.00 | 104380.00 | 4.302  | 0.548 |
| Ag <sub>0.97</sub> CuSe                                                                       | 391  | -30.57  | 59903.00  | 2.116  | 0.010 |
| Eu(Zn <sub>0.9</sub> Cd <sub>0.1</sub> ) <sub>2</sub> Sb <sub>2</sub>                         | 300  | 125.00  | 100500.00 | 2.290  | 0.206 |
| Ag(Bi <sub>0.85</sub> Nb <sub>0.15</sub> ) <sub>0.7</sub> Sb <sub>0.3</sub> Se <sub>2</sub>   | 478  | -276.00 | 2239.00   | 0.632  | 0.129 |
| Ga <sub>0.03</sub> Co <sub>4</sub> Sb <sub>11.985</sub> Ga <sub>0.015</sub>                   | 300  | -286.6  | 11100.00  | 3.500  | 0.100 |
| Cr <sub>2</sub> Ge <sub>2</sub> Te <sub>6</sub>                                               | 713  | 336.08  | 2062.50   | 0.630  | 0.264 |
| Cu <sub>5</sub> Sn <sub>2</sub> S <sub>7</sub>                                                | 300  | 30.40   | 337313.00 | 5.513  | 0.017 |
| Cu <sub>0.9</sub> Pd <sub>0.1</sub> FeS <sub>2</sub>                                          | 70   | -56.49  | 56200.00  | 12.610 | 0.001 |
| Sr <sub>0.16</sub> Yb <sub>0.03</sub> Co <sub>4</sub> Sb <sub>11.82</sub>                     | 850  | -189.00 | 152273.00 | 3.620  | 1.277 |
| Ce <sub>0.2</sub> Bi <sub>1.8</sub> Te <sub>3</sub>                                           | 498  | -154.63 | 59028.00  | 0.670  | 1.049 |
| Nd <sub>2.86</sub> Te <sub>4</sub>                                                            | 1173 | -145.30 | 54180.00  | 1.600  | 0.850 |
| Ag <sub>0.04</sub> Cr <sub>1.96</sub> Se <sub>3</sub>                                         | 725  | 151.40  | 25412.00  | 1.600  | 0.264 |

|                                                                                                         |     |         |           |       |       |
|---------------------------------------------------------------------------------------------------------|-----|---------|-----------|-------|-------|
| Ag(Bi <sub>0.9</sub> Nb <sub>0.1</sub> ) <sub>0.9</sub> Sb <sub>0.1</sub> Se <sub>2</sub>               | 676 | -154.00 | 21831.00  | 0.685 | 0.511 |
| Nb <sub>0.85</sub> Ta <sub>0.15</sub> CoSn <sub>0.9</sub> Sb <sub>0.1</sub>                             | 826 | -163.24 | 85957.00  | 4.124 | 0.459 |
| In <sub>0.015</sub> Pb <sub>0.985</sub> Te <sub>0.998</sub> l <sub>0.002</sub>                          | 378 | -209.00 | 19730.00  | 1.680 | 0.192 |
| GeSe <sub>0.7</sub> Te <sub>0.3</sub>                                                                   | 430 | 20.00   | 85075.00  | 1.612 | 0.009 |
| In <sub>3.95</sub> Pb <sub>0.05</sub> Se <sub>3</sub>                                                   | 405 | -230.00 | 7500.00   | 0.930 | 0.173 |
| AgCuTe <sub>0.7</sub> Se <sub>0.3</sub>                                                                 | 422 | 191.83  | 14854.00  | 0.319 | 0.736 |
| Zr <sub>0.5</sub> Hf <sub>0.5</sub> Co <sub>0.9</sub> Ni <sub>0.1</sub> Sb                              | 300 | -112.70 | 67760.00  | 5.070 | 0.050 |
| Pb <sub>0.995</sub> Zn <sub>0.02</sub> Te                                                               | 825 | -261.14 | 27039.00  | 1.147 | 1.326 |
| Cu <sub>10.5</sub> NiZn <sub>0.5</sub> Sb <sub>4</sub> S <sub>13</sub>                                  | 517 | 190.60  | 19800.00  | 0.550 | 0.677 |
| Cu <sub>2.7</sub> Ag <sub>0.3</sub> ErTe <sub>3</sub>                                                   | 600 | 68.00   | 150000.00 | 1.340 | 0.311 |
| AgCuTe                                                                                                  | 522 | 255.44  | 9806.00   | 0.470 | 0.710 |
| Ba <sub>8</sub> Cu <sub>5</sub> Si <sub>25</sub> Ge <sub>16</sub>                                       | 613 | -97.50  | 84000.00  | 1.903 | 0.255 |
| GeSe <sub>0.9</sub> Te <sub>0.1</sub>                                                                   | 728 | 158.93  | 3483.00   | 0.840 | 0.076 |
| (Sn <sub>0.985</sub> In <sub>0.015</sub> Te) <sub>0.9</sub> (AgCl) <sub>0.1</sub>                       | 423 | 70.22   | 365169.00 | 3.578 | 0.213 |
| Ta <sub>0.84</sub> Ti <sub>0.16</sub> FeSb                                                              | 770 | 200.00  | 135000.00 | 3.913 | 1.065 |
| Ge <sub>1.04</sub> Te                                                                                   | 423 | 100.54  | 323462.00 | 4.105 | 0.337 |
| Mg <sub>3.07</sub> Sb <sub>1.5</sub> Bi <sub>0.48</sub> Se <sub>0.02</sub>                              | 400 | -285.00 | 10734.00  | 0.749 | 0.466 |
| Ag <sub>0.01</sub> Sn <sub>0.99</sub> Se <sub>0.65</sub> S <sub>0.35</sub>                              | 518 | 401.70  | 326.00    | 0.185 | 0.147 |
| Zn <sub>0.9</sub> Cd <sub>0.1</sub> Sc <sub>0.03</sub> O <sub>1.045</sub>                               | 300 | -76.30  | 55100.00  | 7.910 | 0.012 |
| Nd <sub>2.78</sub> Te <sub>4</sub>                                                                      | 373 | -58.00  | 94460.00  | 1.387 | 0.085 |
| (Cu <sub>3</sub> Sn <sub>4</sub> ) <sub>0.915</sub> (Ga <sub>2</sub> Te <sub>3</sub> ) <sub>0.085</sub> | 479 | 71.72   | 150000.00 | 3.429 | 0.108 |
| Ag <sub>0.03</sub> Cr <sub>1.97</sub> Se <sub>3</sub>                                                   | 300 | 82.00   | 39393.00  | 1.534 | 0.052 |
| Cu <sub>2.025</sub> Cd <sub>0.975</sub> SnSe <sub>4</sub>                                               | 550 | 191.20  | 7069.00   | 1.130 | 0.126 |
| Bi <sub>0.825</sub> Ba <sub>0.175</sub> CuSeO                                                           | 319 | 151.28  | 24279.00  | 0.767 | 0.319 |
| Hf <sub>0.7</sub> Ti <sub>0.3</sub> CoSb <sub>0.8</sub> Sn <sub>0.2</sub>                               | 676 | 215.00  | 47800.00  | 2.835 | 0.531 |
| BaBiTe <sub>3</sub>                                                                                     | 323 | -140.00 | 9749.00   | 0.461 | 0.134 |
| SnS                                                                                                     | 873 | 361.00  | 5700.00   | 0.729 | 0.911 |
| Mg <sub>3.07</sub> Sb <sub>1.5</sub> Bi <sub>0.45</sub> Se <sub>0.05</sub>                              | 300 | -279.24 | 7900.00   | 0.874 | 0.212 |
| GeSe <sub>0.75</sub> Te <sub>0.25</sub>                                                                 | 320 | 14.03   | 99254.00  | 1.685 | 0.004 |
| Ca <sub>5</sub> Ga <sub>1.7</sub> Zn <sub>0.3</sub> Sb <sub>6</sub>                                     | 773 | 106.80  | 39512.00  | 1.300 | 0.268 |
| CuGa <sub>0.97</sub> Mn <sub>0.03</sub> Te <sub>2</sub>                                                 | 475 | 214.00  | 22149.00  | 3.652 | 0.132 |
| Ba <sub>8.04</sub> Cu <sub>4.9</sub> Si <sub>3.23</sub> Ge <sub>37.83</sub>                             | 763 | -143.00 | 47800.00  | 1.530 | 0.483 |
| Hf <sub>0.7</sub> Ti <sub>0.3</sub> CoSb <sub>0.8</sub> Sn <sub>0.2</sub>                               | 989 | 230.00  | 47900.00  | 2.871 | 0.873 |

|                                                                                              |      |         |           |       |       |
|----------------------------------------------------------------------------------------------|------|---------|-----------|-------|-------|
| BaCu <sub>4.0</sub> S <sub>3.0</sub>                                                         | 300  | 65.40   | 15464.00  | 0.700 | 0.028 |
| BiCuSeO                                                                                      | 473  | 424.00  | 589.00    | 0.609 | 0.082 |
| Eu <sub>2</sub> ZnSb <sub>2</sub>                                                            | 723  | 288.00  | 4320.00   | 0.420 | 0.617 |
| Ca <sub>3.46</sub> Yb <sub>1.35</sub> Pr <sub>0.19</sub> Al <sub>2</sub> Sb <sub>6</sub>     | 423  | -141.07 | 667.00    | 1.446 | 0.004 |
| Tl <sub>9.0</sub> Bi <sub>0.98</sub> Te <sub>6.0</sub>                                       | 385  | 190.00  | 20636.00  | 0.446 | 0.643 |
| FeNb <sub>0.86</sub> Hf <sub>0.14</sub> Sb                                                   | 400  | 102.90  | 492248.00 | 6.424 | 0.325 |
| Cu <sub>5</sub> Sn <sub>2</sub> S <sub>7</sub>                                               | 524  | 54.83   | 200000.00 | 3.638 | 0.087 |
| Cu <sub>3</sub> Sb <sub>0.85</sub> Ge <sub>0.15</sub> S <sub>4</sub>                         | 373  | 137.78  | 45664.00  | 1.794 | 0.180 |
| Tb <sub>0.03</sub> Co <sub>4</sub> Sb <sub>12</sub>                                          | 800  | -176    | 38700.00  | 3.400 | 0.200 |
| Ba <sub>0.05</sub> Yb <sub>0.09</sub> Co <sub>4</sub> Sb <sub>12</sub>                       | 300  | -157.50 | 112400.00 | 2.814 | 0.290 |
| Ca <sub>9</sub> Yb <sub>2</sub> Sb <sub>9</sub> Ge                                           | 513  | -1.33   | 14639.00  | 0.884 | 0.000 |
| Yb <sub>13.43</sub> Ce <sub>0.44</sub> Mn <sub>1.07</sub> Sb <sub>11.07</sub>                | 300  | 28.20   | 43750.00  | 0.720 | 0.014 |
| Ta <sub>0.88</sub> Ti <sub>0.12</sub> FeSb                                                   | 304  | 111.40  | 401150.00 | 5.977 | 0.253 |
| Cu <sub>2</sub> Se <sub>0.92</sub> I <sub>0.08</sub>                                         | 410  | 190.00  | 10278.00  | 0.519 | 0.293 |
| Sb <sub>0.1</sub> Ge <sub>0.9</sub> Te                                                       | 573  | 221.40  | 55046.00  | 1.455 | 1.039 |
| EuCd <sub>2</sub> Sb <sub>2</sub>                                                            | 300  | 227.20  | 11111.00  | 1.412 | 0.122 |
| Ge <sub>0.55</sub> Pb <sub>0.45</sub> Te <sub>0.5</sub> Se <sub>0.5</sub>                    | 668  | 279.50  | 10000.00  | 0.390 | 1.464 |
| Sr <sub>14.7</sub> Ga <sub>28.7</sub> Ge <sub>56.6</sub>                                     | 772  | -153.94 | 52325.00  | 1.513 | 0.633 |
| TmCuTe <sub>2</sub>                                                                          | 720  | 175.00  | 23731.00  | 0.711 | 0.736 |
| Ag <sub>0.97</sub> CuSe                                                                      | 557  | 204.46  | 15597.00  | 0.564 | 0.644 |
| PbZn <sub>0.015</sub> Te                                                                     | 520  | -326.00 | 15980.00  | 1.244 | 0.728 |
| TiZr <sub>0.005</sub> NiSn                                                                   | 729  | -181.80 | 83721.00  | 3.015 | 0.669 |
| Sn <sub>0.91</sub> Mn <sub>0.09</sub> Te <sub>0.97</sub> I <sub>0.03</sub>                   | 818  | 202.06  | 53333.00  | 1.565 | 1.138 |
| Ba <sub>1.4</sub> Bi <sub>0.6</sub> CoRuO <sub>6</sub>                                       | 618  | 66.50   | 93800.00  | 1.094 | 0.234 |
| Mg <sub>2.16</sub> (Si <sub>0.4</sub> Sn <sub>0.6</sub> ) <sub>0.99</sub> Bi <sub>0.01</sub> | 300  | -155.44 | 127519.00 | 2.546 | 0.363 |
| Ag <sub>3.9</sub> Mo <sub>9</sub> Se <sub>11</sub>                                           | 743  | 181.60  | 16500.00  | 0.740 | 0.546 |
| Zn <sub>0.85</sub> Cd <sub>0.15</sub> Sc <sub>0.02</sub> O <sub>1.03</sub>                   | 373  | -59.00  | 19800.00  | 6.583 | 0.004 |
| Ge <sub>0.87</sub> Mn <sub>0.05</sub> Sb <sub>0.08</sub> Te                                  | 773  | 213.90  | 70103.00  | 1.490 | 1.664 |
| Cu <sub>1.7</sub> Se                                                                         | 572  | 40.59   | 424324.00 | 5.006 | 0.080 |
| Ge <sub>0.55</sub> Pb <sub>0.45</sub> Te <sub>0.3</sub> Se <sub>0.7</sub>                    | 721  | 290.63  | 6875.00   | 0.685 | 0.728 |
| Ca <sub>0.2</sub> BaGd <sub>1.8</sub> NiO <sub>5</sub>                                       | 1188 | 188.24  | 457.55    | 1.539 | 0.013 |
| Sn <sub>0.91</sub> Mn <sub>0.09</sub> Te <sub>0.98</sub> I <sub>0.02</sub>                   | 818  | 202.06  | 54872.00  | 1.489 | 1.231 |
| Yb <sub>13.43</sub> Ce <sub>0.44</sub> Mn <sub>1.07</sub> Sb <sub>11.07</sub>                | 673  | 149.37  | 22900.00  | 0.683 | 0.503 |

|                                                                                                |       |         |           |        |       |
|------------------------------------------------------------------------------------------------|-------|---------|-----------|--------|-------|
| Sr <sub>0.16</sub> Yb <sub>0.03</sub> Co <sub>4</sub> Sb <sub>11.82</sub>                      | 350   | -126.00 | 273182.00 | 3.900  | 0.389 |
| In <sub>4</sub> Se <sub>2.32</sub> Cl <sub>0.03</sub>                                          | 523   | -270.30 | 16390.00  | 0.820  | 0.764 |
| Eu(Zn <sub>0.9</sub> Cd <sub>0.1</sub> ) <sub>2</sub> Sb <sub>2</sub>                          | 600   | 190.00  | 63500.00  | 1.440  | 0.955 |
| Er <sub>0.02</sub> (Bi <sub>0.23</sub> Sb <sub>0.77</sub> ) <sub>1.98</sub> Te <sub>3</sub>    | 500   | 192.39  | 31784.00  | 1.079  | 0.545 |
| Hf <sub>0.9</sub> Ti <sub>0.1</sub> CoSb <sub>0.8</sub> Sn <sub>0.2</sub>                      | 574.6 | 190.24  | 63972.00  | 3.353  | 0.397 |
| Ag <sub>3.7</sub> Mo <sub>9</sub> Se <sub>11</sub>                                             | 547   | 112.50  | 40700.00  | 1.144  | 0.245 |
| Bi <sub>0.94</sub> Ag <sub>0.06</sub> CuSeO                                                    | 423   | 250.00  | 1430.00   | 0.518  | 0.073 |
| CuGa <sub>0.98</sub> Mn <sub>0.02</sub> Te <sub>2</sub>                                        | 670   | 242.90  | 21974.00  | 2.550  | 0.341 |
| Co <sub>9</sub> S <sub>8</sub>                                                                 | 18    | -2.50   | 94644551  | 27.770 | 0.000 |
| FeNb <sub>0.9</sub> Zr <sub>0.1</sub> Sb                                                       | 1000  | 238.20  | 92200.00  | 6.920  | 0.756 |
| Cu <sub>2.2</sub> Sn <sub>0.8</sub> Sb <sub>0.2</sub> Se <sub>3.2</sub>                        | 523   | 75.00   | 146800.00 | 2.800  | 0.154 |
| Cu <sub>3</sub> Sb <sub>0.925</sub> Ge <sub>0.075</sub> S <sub>4</sub>                         | 300   | 175.00  | 20200.00  | 2.039  | 0.091 |
| Ba <sub>8.04</sub> Cu <sub>4.9</sub> Si <sub>3.23</sub> Ge <sub>37.83</sub>                    | 417   | -80.80  | 85500.00  | 1.563  | 0.149 |
| Ag <sub>2</sub> Se                                                                             | 573   | -103.60 | 114210.00 | 3.080  | 0.221 |
| Cu <sub>5</sub> SnSbSe <sub>6.79</sub>                                                         | 473   | 47.47   | 316379.00 | 4.172  | 0.081 |
| NbCo <sub>0.94</sub> Ni <sub>0.06</sub> Sn                                                     | 898   | -108.24 | 96190.00  | 6.369  | 0.159 |
| Mg <sub>3.5</sub> Ho <sub>0.04</sub> Sb <sub>1.97</sub> Te <sub>0.03</sub>                     | 300   | -206.34 | 27189.00  | 1.179  | 0.295 |
| Li <sub>0.03</sub> Cu <sub>1.81</sub> Bi <sub>0.04</sub> Se                                    | 761   | 140.50  | 54023.00  | 1.188  | 0.683 |
| Rb <sub>2</sub> Bi <sub>8</sub> Se <sub>12.9805</sub>                                          | 625   | -275.00 | 3290.00   | 0.540  | 0.288 |
| YbCd <sub>2</sub> Sb <sub>2</sub>                                                              | 650   | 154.60  | 66800.00  | 1.232  | 0.842 |
| Zn <sub>0.9</sub> Cd <sub>0.1</sub> Sc <sub>0.02</sub> O <sub>1.03</sub>                       | 473   | -86.50  | 52000.00  | 5.500  | 0.033 |
| Gd <sub>2</sub> Se <sub>2.92</sub>                                                             | 750   | -145.29 | 17799.00  | 1.125  | 0.250 |
| Cu <sub>5</sub> SnSbSe <sub>6.58</sub>                                                         | 373   | 35.52   | 296552.00 | 3.957  | 0.035 |
| Eu(Zn <sub>0.5</sub> Cd <sub>0.5</sub> ) <sub>2</sub> Sb <sub>2</sub>                          | 650   | 250.00  | 18640.00  | 0.978  | 0.774 |
| Mg <sub>1.96</sub> Li <sub>0.04</sub> Zn <sub>0.98</sub> Sb <sub>2</sub>                       | 773   | 122.22  | 58836.00  | 1.100  | 0.618 |
| Mg <sub>2.16</sub> (Si <sub>0.4</sub> Sn <sub>0.6</sub> ) <sub>0.985</sub> Bi <sub>0.015</sub> | 300   | -136.00 | 177000.00 | 2.682  | 0.366 |
| La <sub>0.3</sub> Co <sub>4</sub> Sb <sub>12</sub>                                             | 673   | 99.00   | 25362.00  | 3.580  | 0.047 |
| Sr <sub>0.11</sub> Ba <sub>0.18</sub> Co <sub>4</sub> Sb <sub>12.09</sub>                      | 650   | -149.00 | 242593.00 | 3.900  | 0.898 |
| Cu <sub>2</sub> SnSe <sub>3</sub>                                                              | 473   | 200.00  | 2133.00   | 1.680  | 0.024 |
| Cu <sub>2.05</sub> Cd <sub>0.95</sub> SnSe <sub>4</sub>                                        | 300   | 142.20  | 10750.00  | 2.338  | 0.028 |
| Ge <sub>1.04</sub> Te                                                                          | 523   | 137.00  | 211000.00 | 3.060  | 0.677 |
| Ag <sub>0.97</sub> Cr <sub>0.95</sub> Sb <sub>0.05</sub> Se <sub>2</sub>                       | 703   | 167.95  | 9109.00   | 0.464  | 0.389 |
| AgBiSe <sub>2.0</sub>                                                                          | 612   | -263.00 | 4536.00   | 0.500  | 0.384 |

|                                                                                            |     |         |           |        |       |
|--------------------------------------------------------------------------------------------|-----|---------|-----------|--------|-------|
| LiCo <sub>0.98</sub> Ni <sub>0.02</sub> O <sub>2</sub>                                     | 623 | 944.83  | 1.13      | 2.296  | 0.000 |
| In <sub>4</sub> Pb <sub>0.01</sub> Sn <sub>0.03</sub> Se <sub>2.9</sub> Cl <sub>0.04</sub> | 623 | -259.40 | 14183.00  | 0.581  | 1.023 |
| Ag <sub>2</sub> Se                                                                         | 423 | -87.60  | 139837.00 | 3.004  | 0.148 |
| (SnTe) <sub>40</sub> Sb <sub>2</sub> Te <sub>3</sub>                                       | 723 | 129.40  | 119500.00 | 2.802  | 0.516 |
| Se <sub>0.3</sub> Co <sub>4</sub> Sb <sub>11.4</sub> Se <sub>0.6</sub>                     | 800 | -212    | 25600.00  | 2.100  | 0.400 |
| SnTe <sub>0.1</sub> AgSbSe <sub>2</sub>                                                    | 300 | 53.20   | 206711.00 | 2.445  | 0.072 |
| Cu <sub>2</sub> S <sub>0.5</sub> Se <sub>0.5</sub>                                         | 300 | 172.12  | 1485.00   | 0.448  | 0.029 |
| Cu <sub>1.02</sub> Fe <sub>0.98</sub> S <sub>2</sub>                                       | 100 | -671.20 | 10.75     | 31.020 | 0.000 |
| As <sub>2</sub> Te <sub>2.3</sub> Se <sub>0.7</sub>                                        | 473 | 297.96  | 421.70    | 0.466  | 0.038 |
| Ta <sub>0.98</sub> Ti <sub>0.02</sub> FeSb                                                 | 770 | 298.00  | 34000.00  | 5.140  | 0.452 |
| Pb <sub>0.96</sub> Tl <sub>0.02</sub> Na <sub>0.02</sub> Te                                | 397 | 150.65  | 79763.00  | 1.796  | 0.400 |
| Sn <sub>0.8</sub> Ge <sub>0.2</sub> Te                                                     | 873 | 130.00  | 122500.00 | 3.100  | 0.586 |
| Pb <sub>0.98</sub> Tl <sub>0.01</sub> Na <sub>0.01</sub> Te                                | 798 | 246.41  | 33233.00  | 0.854  | 1.886 |
| MgAgSb <sub>0.98</sub> In <sub>0.02</sub>                                                  | 450 | 175.09  | 64144.00  | 1.336  | 0.696 |
| Ca <sub>3</sub> AlSb <sub>3</sub>                                                          | 522 | 390.00  | 498.00    | 0.850  | 0.045 |
| Bi <sub>0.84</sub> Pb <sub>0.08</sub> Yb <sub>0.08</sub> CuSeO                             | 741 | 148.03  | 14120.00  | 0.467  | 0.491 |
| Sn <sub>0.87</sub> Mn <sub>0.1</sub> Bi <sub>0.03</sub> Te                                 | 473 | 87.40   | 198000.00 | 3.850  | 0.186 |
| Ba <sub>2</sub> CoRuO <sub>6</sub>                                                         | 318 | 54.80   | 33800.00  | 1.485  | 0.022 |
| Ca <sub>0.05</sub> BaGd <sub>1.95</sub> NiO <sub>5</sub>                                   | 526 | 259.56  | 30.01     | 1.859  | 0.001 |
| Ca <sub>1.55</sub> Yb <sub>3.45</sub> Al <sub>2</sub> Sb <sub>6</sub>                      | 327 | 138.67  | 180.00    | 1.033  | 0.001 |
| Cu <sub>3</sub> Sb <sub>0.975</sub> Ge <sub>0.025</sub> S <sub>4</sub>                     | 473 | 329.10  | 4950.00   | 1.052  | 0.241 |
| Ag <sub>0.97</sub> Cr <sub>0.99</sub> Bi <sub>0.01</sub> Se <sub>2</sub>                   | 603 | 125.42  | 12082.00  | 0.405  | 0.283 |
| Sn <sub>0.98</sub> Pb <sub>0.01</sub> Zn <sub>0.01</sub> Se                                | 773 | 370.57  | 5582.00   | 0.549  | 1.079 |
| TiZr <sub>0.005</sub> NiSn                                                                 | 626 | -189.00 | 71800.00  | 2.677  | 0.618 |
| Cu <sub>5</sub> SnSbSe <sub>6.79</sub>                                                     | 573 | 56.44   | 260345.00 | 3.819  | 0.124 |
| Ti <sub>0.25</sub> Hf <sub>0.75</sub> CoSb <sub>0.85</sub> Sn <sub>0.15</sub>              | 981 | 266.30  | 42950.00  | 1.990  | 1.150 |
| Ba <sub>0.97</sub> K <sub>0.03</sub> Zn <sub>2</sub> As <sub>2</sub>                       | 323 | 47.53   | 164103.00 | 3.371  | 0.036 |
| (SnTe) <sub>0.86</sub> (CuSbTe <sub>2</sub> ) <sub>0.14</sub>                              | 625 | 118.60  | 116900.00 | 2.290  | 0.449 |
| FeNb <sub>0.88</sub> Hf <sub>0.12</sub> Sb                                                 | 500 | 138.00  | 322500.00 | 6.200  | 0.500 |
| Ba <sub>8</sub> Ga <sub>15.88</sub> Zn <sub>0.007</sub> Sn <sub>30.12</sub>                | 340 | 341.00  | 15620.00  | 0.937  | 0.659 |
| Li <sub>0.03</sub> Cu <sub>1.83</sub> Bi <sub>0.02</sub> Se                                | 504 | 47.75   | 173563.00 | 2.036  | 0.098 |
| CsNd <sub>2</sub> Ag <sub>3</sub> Te <sub>5</sub>                                          | 298 | -32.57  | 83.82     | 0.530  | 0.000 |
| Rb <sub>2</sub> Bi <sub>8</sub> Se <sub>12.974</sub> Cl <sub>0.026</sub>                   | 428 | -106.70 | 21770.00  | 0.769  | 0.138 |



|                                                                                           |     |         |           |        |       |
|-------------------------------------------------------------------------------------------|-----|---------|-----------|--------|-------|
| Cu <sub>1.02</sub> Fe <sub>0.98</sub> S <sub>2</sub>                                      | 300 | -534.40 | 115.48    | 11.020 | 0.001 |
| BaBiTe <sub>2.95</sub> Se <sub>0.05</sub>                                                 | 575 | -196.70 | 7510.00   | 0.408  | 0.410 |
| Cu <sub>3</sub> Sb <sub>0.997</sub> In <sub>0.003</sub> Se <sub>4</sub>                   | 323 | 252.00  | 5600.00   | 2.480  | 0.050 |
| (Sn <sub>0.8</sub> Ge <sub>0.2</sub> ) <sub>0.82</sub> Mn <sub>0.18</sub> Te              | 300 | 60.30   | 169300.00 | 2.134  | 0.086 |
| Bi <sub>0.8</sub> Ba <sub>0.2</sub> CuSeO                                                 | 420 | 180.25  | 17500.00  | 0.805  | 0.365 |
| BiCu <sub>0.90</sub> SeO                                                                  | 923 | 283.00  | 162.50    | 0.647  | 0.019 |
| AgBi <sub>0.9</sub> Sb <sub>0.1</sub> Se <sub>2</sub>                                     | 500 | 453.13  | 179.00    | 0.402  | 0.040 |
| Sn <sub>0.96</sub> Pb <sub>0.03</sub> Zn <sub>0.01</sub> Se                               | 773 | 406.00  | 4317.00   | 0.363  | 1.517 |
| Gd <sub>2</sub> Se <sub>2.92</sub>                                                        | 350 | -81.16  | 35380.00  | 1.913  | 0.043 |
| Ca <sub>3</sub> Al <sub>0.95</sub> Zn <sub>0.05</sub> Sb <sub>3</sub>                     | 422 | 184.00  | 4745.00   | 1.060  | 0.060 |
| In <sub>0.015</sub> Pb <sub>0.985</sub> Te <sub>0.996</sub> l <sub>0.004</sub>            | 663 | -225.78 | 19688.00  | 1.259  | 0.529 |
| Hf <sub>0.7</sub> Ti <sub>0.3</sub> CoSb <sub>0.8</sub> Sn <sub>0.2</sub>                 | 377 | 175.00  | 52700.00  | 2.800  | 0.220 |
| AgBi <sub>0.9</sub> Sb <sub>0.1</sub> Se <sub>2</sub>                                     | 378 | -130.56 | 16312.00  | 0.481  | 0.219 |
| Cu <sub>1.6</sub> S                                                                       | 350 | 16.75   | 404808.00 | 3.541  | 0.011 |
| Cu <sub>1.55</sub> S                                                                      | 450 | 19.12   | 488571.00 | 4.757  | 0.017 |
| Cu <sub>2.7</sub> Ag <sub>0.3</sub> ErTe <sub>3</sub>                                     | 700 | 99.00   | 55000.00  | 0.595  | 0.634 |
| Ag <sub>0.97</sub> CrSe <sub>2</sub>                                                      | 603 | 131.46  | 12601.00  | 0.399  | 0.329 |
| SnTe <sub>0.25</sub> AgSbSe <sub>2</sub>                                                  | 800 | 139.50  | 73450.00  | 1.740  | 0.657 |
| TiO <sub>2</sub>                                                                          | 296 | -461.86 | 388.00    | 6.302  | 0.004 |
| Bi <sub>2</sub> Te <sub>3</sub>                                                           | 373 | -143.40 | 107500.00 | 0.900  | 0.916 |
| Ag(Bi <sub>0.9</sub> Pb <sub>0.1</sub> ) <sub>0.9</sub> Sb <sub>0.1</sub> Se <sub>2</sub> | 526 | 483.33  | 316.23    | 0.443  | 0.088 |
| Co <sub>0.95</sub> Ni <sub>0.05</sub> GeTe                                                | 327 | -44.26  | 171693.00 | 6.250  | 0.018 |
| K <sub>0.98</sub> Ba <sub>0.02</sub> GaSb <sub>4</sub>                                    | 509 | -192.86 | 21130.00  | 0.782  | 0.512 |
| CuAgTe <sub>0.7</sub> Se <sub>0.3</sub>                                                   | 363 | 254.08  | 8503.00   | 0.332  | 0.601 |
| Sn <sub>1.03</sub> Se <sub>0.12</sub> Te <sub>0.865</sub> Br <sub>0.015</sub>             | 723 | 144.20  | 80702.00  | 2.082  | 0.572 |
| CoSi <sub>0.98</sub> Ge <sub>0.02</sub>                                                   | 320 | -81.45  | 584370.00 | 12.080 | 0.103 |
| Al <sub>0.01</sub> Ge <sub>0.99</sub> Te                                                  | 473 | 65.50   | 400000.00 | 5.243  | 0.155 |
| Ag <sub>3.8</sub> Mo <sub>9</sub> Se <sub>11</sub>                                        | 645 | 157.50  | 22700.00  | 0.800  | 0.454 |
| (Nb <sub>0.6</sub> Ta <sub>0.4</sub> ) <sub>0.8</sub> Ti <sub>0.2</sub> FeSb              | 300 | 74.70   | 541640.00 | 1.760  | 0.180 |
| Sn <sub>0.99</sub> Ce <sub>0.01</sub> Te                                                  | 623 | 85.43   | 178500.00 | 3.350  | 0.242 |
| Nb <sub>0.8</sub> Ta <sub>0.2</sub> CoSn <sub>0.9</sub> Sb <sub>0.1</sub>                 | 728 | -156.19 | 90364.00  | 4.186  | 0.383 |
| Na <sub>0.13</sub> Co <sub>4</sub> Sb <sub>12</sub>                                       | 300 | -200    | 86000.00  | 6.400  | 0.200 |
| (PbTe) <sub>0.1</sub> (Ag <sub>2</sub> Te) <sub>0.9</sub>                                 | 300 | -92.04  | 145950.00 | 0.901  | 0.413 |

|                                                                                           |       |         |           |        |       |
|-------------------------------------------------------------------------------------------|-------|---------|-----------|--------|-------|
| (Cu <sub>0.001</sub> Pb <sub>0.999</sub> Te)(MnTe) <sub>0.03</sub>                        | 773   | -241.58 | 28082.00  | 1.136  | 1.115 |
| (CaZn <sub>0.4</sub> Ag <sub>0.2</sub> Sb) <sub>0.95</sub> (LiZnSb) <sub>0.05</sub>       | 673   | 161.90  | 31325.00  | 0.888  | 0.622 |
| BaBiTe <sub>3</sub>                                                                       | 574   | -183.00 | 8685.00   | 0.427  | 0.391 |
| Ag(Bi <sub>0.9</sub> Pb <sub>0.1</sub> ) <sub>0.9</sub> Sb <sub>0.1</sub> Se <sub>2</sub> | 326   | 561.11  | 197.18    | 0.565  | 0.036 |
| CuAgTe <sub>0.7</sub> Se <sub>0.3</sub>                                                   | 330   | 232.34  | 10303.00  | 0.375  | 0.489 |
| Cu <sub>2.88</sub> Ag <sub>0.12</sub> SbSe <sub>4</sub>                                   | 348   | 356.00  | 11329.00  | 1.680  | 0.297 |
| Rb <sub>7.88</sub> Au <sub>2.47</sub> Ge <sub>43.53</sub>                                 | 100   | -6.11   | 196.23    | 1.583  | 0.000 |
| BiCuSeO                                                                                   | 522   | 398.10  | 971.00    | 0.578  | 0.140 |
| NbCo <sub>0.96</sub> Ni <sub>0.04</sub> Sn                                                | 492   | -139.41 | 97278.00  | 8.571  | 0.109 |
| (Sn <sub>0.8</sub> Ge <sub>0.2</sub> ) <sub>0.97</sub> Mn <sub>0.03</sub> Te              | 773   | 117.00  | 129200.00 | 2.360  | 0.579 |
| Cu <sub>2</sub> Se <sub>0.92</sub> I <sub>0.08</sub>                                      | 400   | 186.00  | 10472.00  | 0.518  | 0.280 |
| GeSe <sub>0.55</sub> Te <sub>0.45</sub>                                                   | 430   | 70.77   | 181852.00 | 2.466  | 0.159 |
| LaCo <sub>0.95</sub> Fe <sub>0.05</sub> O <sub>3</sub>                                    | 300   | 614.50  | 45.00     | 0.291  | 0.026 |
| Mg <sub>3</sub> Sb <sub>1.6</sub> Bi <sub>0.4</sub>                                       | 660   | 277.00  | 1900.00   | 0.470  | 0.205 |
| FeNb <sub>0.88</sub> Hf <sub>0.12</sub> Sb                                                | 1000  | 223.30  | 109300.00 | 4.373  | 1.253 |
| Ca <sub>2</sub> Yb <sub>9</sub> Sb <sub>9</sub> Ge                                        | 419   | 19.56   | 873.47    | 1.845  | 0.000 |
| In <sub>0.01</sub> Pb <sub>0.99</sub> Te <sub>0.996</sub> I <sub>0.004</sub>              | 378   | -202.00 | 40625.00  | 1.644  | 0.381 |
| Sn <sub>0.97</sub> Mn <sub>0.03</sub> Te                                                  | 426   | 53.13   | 357396.00 | 5.803  | 0.074 |
| Ge <sub>4</sub> Sb <sub>2</sub> Te <sub>7</sub>                                           | 373   | 51.33   | 200000.00 | 2.094  | 0.094 |
| Cu <sub>2</sub> Se <sub>0.9</sub> S <sub>0.1</sub>                                        | 333   | 45.54   | 63429.00  | 0.427  | 0.103 |
| Yb <sub>0.35</sub> Co <sub>4</sub> Sb <sub>12</sub>                                       | 300   | -130    | 213100.00 | 1.800  | 0.400 |
| Mn <sub>2</sub> Cu <sub>3</sub> In <sub>3</sub> Te <sub>8</sub>                           | 866   | 300.00  | 2600.00   | 0.485  | 0.418 |
| Bi <sub>1.94</sub> Nb <sub>0.06</sub> Te <sub>3</sub>                                     | 366   | -97.40  | 77647.00  | 0.870  | 0.310 |
| Ba <sub>0.5</sub> Cr <sub>5</sub> Se <sub>8</sub>                                         | 625.8 | 312.16  | 1240.00   | 1.470  | 0.051 |
| CaTiO <sub>3</sub>                                                                        | 321   | -252.30 | 5400.00   | 4.692  | 0.024 |
| Co <sub>9</sub> S <sub>8</sub>                                                            | 150   | -7.20   | 3679062   | 15.740 | 0.002 |
| Ca <sub>3</sub> Al <sub>0.98</sub> Zn <sub>0.02</sub> Sb <sub>3</sub>                     | 522   | 230.70  | 3870.00   | 0.947  | 0.114 |
| ZrNiPb                                                                                    | 673   | -198.80 | 29603.00  | 5.470  | 0.145 |
| Pb <sub>0.96</sub> Tl <sub>0.02</sub> Na <sub>0.02</sub> Te                               | 798   | 245.10  | 34006.00  | 0.803  | 2.029 |
| Sr <sub>0.21</sub> Co <sub>4</sub> Sb <sub>12.25</sub>                                    | 850   | -193.00 | 122273.00 | 3.800  | 1.019 |
| Cu <sub>1.6</sub> S                                                                       | 550   | 33.32   | 332211.00 | 4.400  | 0.046 |
| Cu <sub>1.85</sub> Ag <sub>0.15</sub> SnSe <sub>3</sub>                                   | 500   | 316.16  | 1010.00   | 0.537  | 0.094 |
| Mg <sub>1.98</sub> K <sub>0.02</sub> Zn <sub>0.98</sub> Sb <sub>2</sub>                   | 473   | 254.50  | 7407.00   | 0.634  | 0.358 |

|                                                                                           |     |         |           |       |       |
|-------------------------------------------------------------------------------------------|-----|---------|-----------|-------|-------|
| Gd <sub>2.75</sub> Se <sub>4</sub>                                                        | 650 | -168.80 | 5720.00   | 0.789 | 0.134 |
| Nb <sub>0.9</sub> Ta <sub>0.1</sub> CoSn <sub>0.9</sub> Sb <sub>0.1</sub>                 | 924 | -173.90 | 83900.00  | 4.090 | 0.573 |
| Ag(Bi <sub>0.9</sub> Nb <sub>0.1</sub> ) <sub>0.9</sub> Sb <sub>0.1</sub> Se <sub>2</sub> | 326 | -88.00  | 33333.00  | 0.702 | 0.120 |
| Ba <sub>0.05</sub> Yb <sub>0.09</sub> Co <sub>4</sub> Sb <sub>12.13</sub>                 | 800 | -233    | 78000.00  | 1.400 | 1.300 |
| Bi <sub>0.96</sub> Pb <sub>0.02</sub> Yb <sub>0.02</sub> CuSeO                            | 446 | 157.00  | 21600.00  | 0.744 | 0.319 |
| (Sn <sub>0.8</sub> Ge <sub>0.2</sub> ) <sub>0.91</sub> Mn <sub>0.09</sub> Te              | 473 | 74.10   | 186400.00 | 2.213 | 0.216 |
| Mg <sub>3</sub> Sb <sub>2</sub>                                                           | 660 | 328.00  | 1320.00   | 0.670 | 0.140 |
| Sn <sub>0.91</sub> Mn <sub>0.09</sub> Te <sub>0.99</sub> l <sub>0.01</sub>                | 331 | 61.86   | 241538.00 | 3.756 | 0.081 |
| (Sn <sub>0.8</sub> Ge <sub>0.2</sub> ) <sub>0.88</sub> Mn <sub>0.12</sub> Te              | 473 | 78.00   | 175900.00 | 2.064 | 0.245 |
| Ca <sub>3</sub> Al <sub>0.99</sub> Zn <sub>0.01</sub> Sb <sub>3</sub>                     | 422 | 171.70  | 10900.00  | 1.269 | 0.101 |
| Ca <sub>10</sub> GaSb <sub>9</sub>                                                        | 573 | 64.93   | 500.00    | 0.603 | 0.002 |
| Nd <sub>2.84</sub> Te <sub>4</sub>                                                        | 573 | -74.30  | 92600.00  | 1.837 | 0.159 |
| Co <sub>4</sub> Sb <sub>11.5</sub> Te <sub>0.5</sub>                                      | 300 | -123    | 100400.00 | 3.300 | 0.100 |
| Gd <sub>2</sub> Se <sub>2.98</sub>                                                        | 750 | -196.38 | 20127.00  | 1.237 | 0.471 |
| Sn <sub>1.03</sub> Se <sub>0.15</sub> Te <sub>0.85</sub>                                  | 723 | 129.85  | 85088.00  | 2.245 | 0.462 |
| (GeTe) <sub>0.9</sub> (AgSnSe <sub>2</sub> ) <sub>0.1</sub>                               | 323 | 34.70   | 301935.00 | 2.712 | 0.043 |
| Ge <sub>0.55</sub> Pb <sub>0.45</sub> Te                                                  | 300 | 50.00   | 75949.00  | 2.506 | 0.023 |
| Bi <sub>0.94</sub> Ag <sub>0.06</sub> CuSeO                                               | 323 | 223.00  | 1662.00   | 0.552 | 0.048 |
| Li <sub>0.03</sub> Cu <sub>1.8</sub> Bi <sub>0.05</sub> Se                                | 504 | 69.23   | 91954.00  | 1.384 | 0.161 |
| Ag <sub>1.1</sub> Sb <sub>0.8</sub> Pb <sub>15.5</sub> Te <sub>22.6</sub>                 | 373 | 320.00  | 5000.00   | 1.110 | 0.187 |
| AgSn <sub>15.0</sub> BiTe <sub>17.0</sub>                                                 | 400 | 94.00   | 157692.00 | 2.410 | 0.231 |
| Sn <sub>0.965</sub> Pb <sub>0.01</sub> Cd <sub>0.025</sub> Se                             | 673 | 409.93  | 1762.00   | 0.405 | 0.492 |
| BaZn <sub>2</sub> As <sub>2</sub>                                                         | 723 | 283.90  | 3003.00   | 0.922 | 0.190 |
| Zn <sub>0.875</sub> Cd <sub>0.125</sub> Sc <sub>0.02</sub> O <sub>1.03</sub>              | 473 | -93.00  | 38330.00  | 5.080 | 0.030 |
| Ti <sub>0.9</sub> Mn <sub>0.1</sub> NiSn <sub>0.9</sub> Sb <sub>0.1</sub>                 | 398 | -87.14  | 320530.00 | 6.403 | 0.151 |
| Tl <sub>0.7</sub> Co <sub>4</sub> Sn <sub>0.75</sub> Sb <sub>11.25</sub>                  | 50  | -14.53  | 47867.00  | 2.612 | 0.000 |
| Ba <sub>8.02</sub> Cu <sub>4.98</sub> Si <sub>35</sub> Ge <sub>5.99</sub>                 | 417 | -58.00  | 131400.00 | 2.170 | 0.083 |
| BaBiTe <sub>2.95</sub> Se <sub>0.05</sub>                                                 | 322 | -152.00 | 6210.00   | 0.437 | 0.106 |
| Se <sub>0.03</sub> Co <sub>4</sub> Sb <sub>11.94</sub> Se <sub>0.06</sub>                 | 600 | -334    | 13200.00  | 3.200 | 0.300 |
| BaZn <sub>2</sub> As <sub>2</sub>                                                         | 623 | 267.90  | 3636.00   | 1.078 | 0.151 |
| Cu <sub>2.94</sub> Ag <sub>0.06</sub> SbSe <sub>4</sub>                                   | 473 | 439.00  | 4444.00   | 1.200 | 0.338 |
| Bi <sub>0.8</sub> Pb <sub>0.1</sub> Yb <sub>0.1</sub> CuSeO                               | 847 | 173.68  | 8520.00   | 0.478 | 0.456 |
| Ag <sub>3.7</sub> Mo <sub>9</sub> Se <sub>11</sub>                                        | 645 | 128.00  | 35967.00  | 1.128 | 0.337 |

|                                                                                                          |       |         |           |       |       |
|----------------------------------------------------------------------------------------------------------|-------|---------|-----------|-------|-------|
| (Sn <sub>0.8</sub> Ge <sub>0.2</sub> ) <sub>0.88</sub> Mn <sub>0.12</sub> Te                             | 673   | 113.00  | 127685.00 | 1.827 | 0.601 |
| Cu <sub>26</sub> Ti <sub>2</sub> Sb <sub>3</sub> Ge <sub>3</sub> S <sub>32</sub>                         | 498   | 103.61  | 111765.00 | 1.747 | 0.342 |
| Ag <sub>2</sub> Mo <sub>6</sub> Te <sub>8</sub>                                                          | 500   | 13.04   | 202768.00 | 3.881 | 0.004 |
| Hf <sub>0.9</sub> Ti <sub>0.1</sub> CoSb <sub>0.8</sub> Sn <sub>0.2</sub>                                | 676.4 | 197.00  | 60851.00  | 3.300 | 0.487 |
| Mg <sub>3.5</sub> Gd <sub>0.03</sub> Sb <sub>1.97</sub> Te <sub>0.03</sub>                               | 300   | -215.00 | 18956.00  | 1.004 | 0.262 |
| Tl <sub>9.0</sub> BiTe <sub>6.0</sub>                                                                    | 443   | 260.00  | 10200.00  | 3.800 | 0.080 |
| (GeTe) <sub>0.7</sub> (AgSnSe <sub>2</sub> ) <sub>0.3</sub>                                              | 323   | 29.81   | 68387.00  | 1.231 | 0.016 |
| Sn <sub>0.99</sub> Ce <sub>0.01</sub> Te                                                                 | 323   | 20.30   | 560700.00 | 6.152 | 0.012 |
| GeSe <sub>0.55</sub> Te <sub>0.45</sub>                                                                  | 678   | 110.93  | 137313.00 | 2.447 | 0.468 |
| Mn <sub>2</sub> Cu <sub>3</sub> In <sub>3</sub> Te <sub>8</sub>                                          | 770   | 340.00  | 1600.00   | 0.650 | 0.219 |
| YbCd <sub>1.4</sub> Zn <sub>0.6</sub> Sb <sub>2</sub>                                                    | 550   | 178.78  | 52926.00  | 1.305 | 0.730 |
| Nd <sub>3</sub> Te <sub>4</sub>                                                                          | 373   | -29.00  | 324000.00 | 3.190 | 0.032 |
| CuFe <sub>0.92</sub> In <sub>0.08</sub> S <sub>2</sub>                                                   | 300   | -382.00 | 1785.00   | 3.442 | 0.023 |
| (Cu <sub>3</sub> SnS <sub>4</sub> ) <sub>0.915</sub> (Ga <sub>2</sub> Te <sub>3</sub> ) <sub>0.085</sub> | 627   | 96.97   | 113920.00 | 3.148 | 0.213 |
| In <sub>4</sub> Pb <sub>0.01</sub> Sn <sub>0.03</sub> Se <sub>2.9</sub> Cl <sub>0.04</sub>               | 723   | -257.60 | 14150.00  | 0.542 | 1.253 |
| Zr <sub>0.5</sub> Hf <sub>0.5</sub> Co <sub>0.9</sub> Ni <sub>0.1</sub> Sb                               | 1074  | -226.90 | 64120.00  | 2.370 | 1.020 |
| LiCo <sub>0.96</sub> Ni <sub>0.04</sub> O <sub>2</sub>                                                   | 523   | 884.14  | 0.06      | 1.977 | 0.000 |
| Ge <sub>4</sub> Sb <sub>2</sub> Te <sub>7</sub>                                                          | 573   | 95.10   | 101110.00 | 1.821 | 0.288 |
| (SnTe) <sub>0.92</sub> (CuSbTe <sub>2</sub> ) <sub>0.08</sub>                                            | 620   | 105.49  | 141254.00 | 2.447 | 0.398 |
| La <sub>1.25</sub> Co <sub>4</sub> Sb <sub>12</sub>                                                      | 373   | -64.00  | 245000.00 | 5.265 | 0.071 |
| Ag <sub>0.01</sub> Cr <sub>1.99</sub> Se <sub>3</sub>                                                    | 405   | 119.58  | 34000.00  | 1.618 | 0.122 |
| GeSe <sub>0.95</sub> Te <sub>0.05</sub>                                                                  | 430   | 595.35  | 55.01     | 1.422 | 0.006 |
| Co <sub>4</sub> Sb <sub>11.46</sub> Te <sub>0.43</sub>                                                   | 850   | -203    | 104000.00 | 2.000 | 1.000 |
| Yb <sub>13.49</sub> Ce <sub>0.39</sub> Mn <sub>1.05</sub> Sb <sub>11.08</sub>                            | 973   | 209.06  | 13521.00  | 0.648 | 0.887 |
| Eu <sub>0.34</sub> Co <sub>4</sub> Sb <sub>12</sub>                                                      | 850   | -148    | 191000.00 | 0.800 | 0.900 |
| AgCuTe <sub>0.5</sub> Se <sub>0.5</sub>                                                                  | 723   | 150.00  | 3883.00   | 0.494 | 0.128 |
| EuZn <sub>2</sub> Sb <sub>2</sub>                                                                        | 300   | 119.00  | 118055.00 | 2.606 | 0.192 |
| Yb <sub>14</sub> MnSb <sub>11</sub>                                                                      | 725   | 118.00  | 27860.00  | 1.025 | 0.269 |
| AgBi <sub>0.95</sub> Sb <sub>0.05</sub> Se <sub>2</sub>                                                  | 300   | -666.67 | 2.88      | 0.488 | 0.001 |
| Mo <sub>3</sub> Sb <sub>7</sub> I                                                                        | 523   | 36.29   | 494500.00 | 5.770 | 0.059 |
| Mo <sub>3</sub> Sb <sub>7</sub> I <sub>1.25</sub>                                                        | 423   | 28.20   | 523600.00 | 5.190 | 0.034 |
| K <sub>0.98</sub> Ba <sub>0.02</sub> GaSb <sub>4</sub>                                                   | 602   | -212.93 | 17309.00  | 0.670 | 0.705 |
| Cu <sub>7</sub> PSe <sub>6</sub>                                                                         | 422   | 179.76  | 2451.70   | 0.257 | 0.130 |

|                                                                               |      |         |           |        |       |
|-------------------------------------------------------------------------------|------|---------|-----------|--------|-------|
| Ag <sub>0.97</sub> CuSe                                                       | 629  | 211.50  | 14000.00  | 0.570  | 0.691 |
| SnTe <sub>0.25</sub> AgSbSe <sub>2</sub>                                      | 750  | 143.00  | 71500.00  | 1.660  | 0.661 |
| Ag <sub>0.97</sub> Cr <sub>0.95</sub> Sb <sub>0.05</sub> Se <sub>2</sub>      | 303  | 82.63   | 20889.00  | 0.615  | 0.070 |
| ZnSc <sub>0.02</sub> O <sub>1.03</sub>                                        | 300  | -165.00 | 2800.00   | 52.167 | 0.000 |
| Yb <sub>9</sub> Ca <sub>4</sub> BaMgSb <sub>11</sub>                          | 1100 | 227.62  | 12056.00  | 0.602  | 1.142 |
| La <sub>0.7</sub> Co <sub>4</sub> Sb <sub>12</sub>                            | 773  | -179.00 | 41791.00  | 5.580  | 0.185 |
| Ba <sub>8</sub> Cu <sub>5.18</sub> Si <sub>9.98</sub> Ge <sub>30.85</sub>     | 711  | -139.10 | 46254.00  | 1.666  | 0.378 |
| Yb <sub>13.49</sub> Ce <sub>0.39</sub> Mn <sub>1.05</sub> Sb <sub>11.08</sub> | 1173 | 228.70  | 12270.00  | 0.710  | 1.060 |
| Pb <sub>0.99</sub> Tl <sub>0.01</sub> Te                                      | 597  | 258.17  | 28888.00  | 1.156  | 0.995 |
| Nd <sub>2.9</sub> Te <sub>4</sub>                                             | 1173 | -117.92 | 69230.00  | 2.060  | 0.520 |
| Ag <sub>2</sub> Se <sub>1.02</sub>                                            | 334  | -139.00 | 134200.00 | 1.064  | 0.820 |
| S <sub>0.04</sub> Pd <sub>0.20</sub> Co <sub>3.80</sub> Sb <sub>11.99</sub>   | 700  | -244    | 58000.00  | 2.400  | 0.700 |
| LiCo <sub>0.85</sub> Ni <sub>0.15</sub> O <sub>2</sub>                        | 1023 | 343.80  | 401.00    | 1.398  | 0.035 |
| Ge <sub>0.83</sub> In <sub>0.05</sub> Pb <sub>0.12</sub> Te                   | 375  | 238.66  | 17319.00  | 0.947  | 0.391 |
| Ba <sub>0.24</sub> Co <sub>4</sub> Sb <sub>11.87</sub>                        | 850  | -178    | 170900.00 | 1.300  | 1.100 |
| Nd <sub>2.9</sub> Te <sub>4</sub>                                             | 973  | -99.06  | 87097.00  | 2.184  | 0.350 |
| Tl <sub>0.7</sub> Co <sub>4</sub> Sn <sub>0.75</sub> Sb <sub>11.25</sub>      | 250  | -50.00  | 46330.00  | 2.380  | 0.012 |
| Sn <sub>1.03</sub> Se <sub>0.12</sub> Te <sub>0.865</sub> Br <sub>0.015</sub> | 423  | 31.80   | 355263.00 | 3.881  | 0.039 |
| BiCuSeO                                                                       | 542  | 155.59  | 4776.00   | 0.503  | 0.125 |
| Cu <sub>3</sub> Sb <sub>0.85</sub> Ge <sub>0.15</sub> S <sub>4</sub>          | 473  | 163.00  | 38100.00  | 1.413  | 0.339 |
| Rb <sub>2</sub> Bi <sub>8</sub> Se <sub>12.9909</sub> Cl <sub>0.0091</sub>    | 428  | -178.62 | 8603.00   | 0.590  | 0.199 |
| SnS <sub>0.91</sub> Se <sub>0.09</sub>                                        | 873  | 379.30  | 7500.00   | 0.628  | 1.643 |
| Ba <sub>0.5</sub> Cr <sub>5</sub> Se <sub>8</sub>                             | 833  | 250.00  | 1907.00   | 0.860  | 0.115 |
| Bi <sub>2</sub> Te <sub>3</sub>                                               | 366  | -126.53 | 32338.00  | 0.918  | 0.206 |
| (SnTe) <sub>25</sub> Sb <sub>2</sub> Te <sub>3</sub>                          | 523  | 83.79   | 213500.00 | 3.460  | 0.227 |
| LiCo <sub>0.85</sub> Ni <sub>0.15</sub> O <sub>2</sub>                        | 923  | 389.04  | 188.74    | 1.455  | 0.018 |
| Cu <sub>2</sub> ZnSn <sub>0.925</sub> Ag <sub>0.075</sub> Se <sub>4</sub>     | 673  | 106.20  | 43417.00  | 1.866  | 0.177 |
| Cu <sub>2.94</sub> Ag <sub>0.06</sub> SbSe <sub>4</sub>                       | 323  | 407.00  | 6275.00   | 2.050  | 0.164 |
| Pb <sub>6</sub> Bi <sub>2</sub> Se <sub>9</sub>                               | 523  | -157.00 | 15615.00  | 1.122  | 0.179 |
| Cu <sub>2.075</sub> Sn <sub>0.925</sub> S <sub>3</sub>                        | 700  | 85.95   | 140625.00 | 2.505  | 0.290 |
| Ag <sub>0.01</sub> Sn <sub>0.99</sub> Se <sub>0.8</sub> S <sub>0.2</sub>      | 763  | 370.94  | 1608.00   | 0.185  | 0.913 |
| Cu <sub>3</sub> Sb <sub>0.9</sub> Ge <sub>0.1</sub> S <sub>4</sub>            | 473  | 201.70  | 21544.00  | 1.279  | 0.324 |
| Bi <sub>0.96</sub> Pb <sub>0.04</sub> CuSeO                                   | 250  | 156.70  | 48270.00  | 1.707  | 0.174 |

|                                                                                                          |      |         |           |        |       |
|----------------------------------------------------------------------------------------------------------|------|---------|-----------|--------|-------|
| In <sub>4</sub> Pb <sub>0.01</sub> Sn <sub>0.03</sub> Se <sub>2.9</sub> Cl <sub>0.06</sub>               | 423  | -231.00 | 5225.00   | 0.772  | 0.155 |
| (Cu <sub>3</sub> SnS <sub>4</sub> ) <sub>0.895</sub> (Ga <sub>2</sub> Te <sub>3</sub> ) <sub>0.105</sub> | 700  | 116.16  | 86518.00  | 2.176  | 0.376 |
| In <sub>0.005</sub> Pb <sub>0.995</sub> Te <sub>0.994</sub> l <sub>0.006</sub>                           | 481  | -166.00 | 62900.00  | 1.703  | 0.486 |
| Cu <sub>1.97</sub> In <sub>0.03</sub> Se                                                                 | 870  | 255.72  | 17450.00  | 0.725  | 1.384 |
| Bi <sub>0.92</sub> Pb <sub>0.08</sub> CuSeO                                                              | 50   | 24.23   | 252384.00 | 2.000  | 0.004 |
| Sn <sub>0.91</sub> Mn <sub>0.09</sub> Te                                                                 | 769  | 158.98  | 94675.00  | 2.382  | 0.773 |
| In <sub>0.005</sub> Pb <sub>0.995</sub> Te <sub>0.999</sub> l <sub>0.001</sub>                           | 637  | -260.70 | 12000.00  | 1.360  | 0.382 |
| Ag <sub>0.94</sub> CuSe                                                                                  | 479  | 208.28  | 16210.00  | 0.563  | 0.614 |
| Mg <sub>2</sub> ZnSb <sub>2</sub>                                                                        | 373  | 346.20  | 729.00    | 0.685  | 0.048 |
| Ag <sub>1.2</sub> Sb <sub>0.8</sub> Pb <sub>14.9</sub> Te <sub>22.7</sub>                                | 423  | 438.50  | 1800.00   | 1.060  | 0.138 |
| GeSe <sub>0.9</sub> Te <sub>0.1</sub>                                                                    | 678  | 137.45  | 3304.00   | 1.053  | 0.040 |
| Nd <sub>2.92</sub> Te <sub>4</sub>                                                                       | 1173 | -104.72 | 81910.00  | 2.400  | 0.439 |
| Ag <sub>2.0</sub> Se <sub>0.8</sub> Te <sub>0.2</sub>                                                    | 300  | -126.55 | 90640.00  | 0.750  | 0.581 |
| BiCuSeO                                                                                                  | 250  | 164.43  | 7.70      | 1.541  | 0.000 |
| (SnTe) <sub>25</sub> Sb <sub>2</sub> Te <sub>3</sub>                                                     | 673  | 131.79  | 133797.00 | 2.540  | 0.583 |
| Mg <sub>3.5</sub> Gd <sub>0.035</sub> Sb <sub>2</sub>                                                    | 700  | -275.35 | 12156.00  | 0.702  | 0.919 |
| CsNd <sub>2</sub> Ag <sub>3</sub> Te <sub>5</sub>                                                        | 687  | 157.00  | 976.00    | 0.341  | 0.048 |
| Sn <sub>0.92</sub> Ge <sub>0.04</sub> As <sub>0.04</sub> Te                                              | 470  | 48.05   | 522222.00 | 6.628  | 0.219 |
| Cu <sub>0.98</sub> Pd <sub>0.02</sub> FeS <sub>2</sub>                                                   | 200  | -223.00 | 10746.00  | 9.545  | 0.011 |
| Se <sub>0.3</sub> Co <sub>4</sub> Sb <sub>11.4</sub> Se <sub>0.6</sub>                                   | 300  | -213    | 12600.00  | 2.100  | 0.100 |
| MgAgSb <sub>0.98</sub> In <sub>0.02</sub>                                                                | 350  | 146.00  | 81261.00  | 1.343  | 0.507 |
| Ge <sub>0.85</sub> In <sub>0.05</sub> Pb <sub>0.1</sub> Te                                               | 550  | 237.31  | 36076.00  | 1.113  | 1.004 |
| BiSbSe <sub>2.88</sub> Cl <sub>0.12</sub>                                                                | 500  | -232.00 | 5450.00   | 0.470  | 0.312 |
| Tl <sub>9.0</sub> BiTe <sub>6.0</sub>                                                                    | 503  | 285.00  | 8100.00   | 3.430  | 0.096 |
| In <sub>3.96</sub> Pb <sub>0.04</sub> Se <sub>3</sub>                                                    | 405  | -221.00 | 8700.00   | 1.040  | 0.165 |
| Ca <sub>10</sub> MnSb <sub>9</sub>                                                                       | 373  | 10.82   | 7.38      | 0.727  | 0.000 |
| Sn <sub>0.97</sub> Pb <sub>0.02</sub> Zn <sub>0.01</sub> Se                                              | 300  | 428.87  | 4233.00   | 1.279  | 0.183 |
| Bi <sub>1.2</sub> Sb <sub>0.8</sub> Se <sub>2.88</sub> Cl <sub>0.12</sub>                                | 500  | -152.00 | 17127.00  | 0.710  | 0.279 |
| (CaZn <sub>0.4</sub> Ag <sub>0.2</sub> Sb) <sub>0.83</sub> (LiZnSb) <sub>0.17</sub>                      | 773  | 189.25  | 21776.00  | 0.578  | 1.043 |
| TiS <sub>2</sub>                                                                                         | 300  | -251.00 | 58824.00  | 67.800 | 0.016 |
| K <sub>0.975</sub> Ba <sub>0.025</sub> GaSb <sub>4</sub>                                                 | 509  | -206.12 | 20000.00  | 0.796  | 0.544 |
| Sn <sub>1.03</sub> Te                                                                                    | 523  | 48.72   | 286957.00 | 6.283  | 0.057 |
| CuAgTe <sub>0.5</sub> Se <sub>0.5</sub>                                                                  | 393  | 129.25  | 8527.00   | 0.314  | 0.178 |

|                                                                                                          |      |         |           |       |       |
|----------------------------------------------------------------------------------------------------------|------|---------|-----------|-------|-------|
| Cu <sub>2.9</sub> Ag <sub>0.1</sub> ErTe <sub>3</sub>                                                    | 600  | 65.00   | 168000.00 | 1.640 | 0.260 |
| Sb <sub>0.15</sub> Ge <sub>0.85</sub> Te                                                                 | 473  | 222.90  | 19266.00  | 1.220 | 0.353 |
| Al <sub>0.01</sub> Ge <sub>0.99</sub> Te                                                                 | 323  | 34.29   | 639286.00 | 6.778 | 0.036 |
| Sr <sub>0.11</sub> Ba <sub>0.18</sub> Co <sub>4</sub> Sb <sub>12.09</sub>                                | 300  | -96.00  | 401852.00 | 4.640 | 0.239 |
| Yb <sub>0.35</sub> Co <sub>4</sub> Sb <sub>12</sub>                                                      | 823  | -193    | 128000.00 | 1.400 | 1.200 |
| Ag <sub>0.96</sub> Nb <sub>0.04</sub> BiSe <sub>2.0</sub>                                                | 375  | -98.00  | 24615.00  | 0.715 | 0.124 |
| Ba <sub>8.01</sub> Ga <sub>15.83</sub> Zn <sub>0.019</sub> Sn <sub>30.15</sub>                           | 460  | 479.17  | 4306.00   | 0.778 | 0.585 |
| La <sub>0.25</sub> Ca <sub>0.75</sub> TiO <sub>3</sub>                                                   | 432  | -66.00  | 151000.00 | 3.660 | 0.078 |
| Ag <sub>8</sub> Sn <sub>0.7</sub> Ga <sub>0.3</sub> Se <sub>6</sub>                                      | 640  | -192.00 | 7980.00   | 0.322 | 0.585 |
| Yb <sub>10</sub> Ca <sub>3</sub> BaMgSb <sub>11</sub>                                                    | 700  | 156.35  | 14887.00  | 0.614 | 0.415 |
| Cu <sub>0.9</sub> Pd <sub>0.1</sub> FeS <sub>2</sub>                                                     | 10   | -13.00  | 55804.00  | 5.470 | 0.000 |
| Ag <sub>2.0</sub> Se <sub>0.9</sub> Te <sub>0.1</sub>                                                    | 330  | -135.60 | 97980.00  | 0.845 | 0.704 |
| Nd <sub>2.9</sub> Te <sub>4</sub>                                                                        | 1073 | -109.40 | 77500.00  | 2.090 | 0.450 |
| K <sub>0.98</sub> Ba <sub>0.02</sub> GaSb <sub>4</sub>                                                   | 416  | -161.90 | 26668.00  | 0.960 | 0.303 |
| NbCo <sub>0.96</sub> Ni <sub>0.04</sub> Sn                                                               | 600  | -155.00 | 82604.00  | 7.798 | 0.153 |
| (Cu <sub>3</sub> SnS <sub>4</sub> ) <sub>0.895</sub> (Ga <sub>2</sub> Te <sub>3</sub> ) <sub>0.105</sub> | 479  | 75.25   | 141561.00 | 2.637 | 0.146 |
| CuGaTe <sub>2</sub>                                                                                      | 375  | 365.00  | 2330.00   | 5.750 | 0.027 |
| Ca <sub>10</sub> GaSb <sub>9</sub>                                                                       | 398  | 32.46   | 203.00    | 0.677 | 0.000 |
| Mg <sub>2</sub> Zn <sub>1.04</sub> Sb <sub>2</sub>                                                       | 673  | 104.61  | 5464.00   | 0.779 | 0.052 |
| Al <sub>0.0075</sub> Sb <sub>0.1</sub> Ge <sub>0.8925</sub> Te                                           | 323  | 142.74  | 58474.00  | 1.428 | 0.269 |
| LiCo <sub>0.85</sub> Ni <sub>0.15</sub> O <sub>2</sub>                                                   | 723  | 432.88  | 24.43     | 1.671 | 0.002 |
| Sn <sub>1.03</sub> Se <sub>0.12</sub> Te <sub>0.88</sub>                                                 | 323  | 13.53   | 528947.00 | 5.164 | 0.006 |
| VFeSb                                                                                                    | 350  | -179.60 | 129819.00 | 6.747 | 0.217 |
| Cu <sub>2</sub> Zn <sub>0.2</sub> Fe <sub>0.8</sub> SnSe <sub>4</sub>                                    | 573  | 245.38  | 3356.00   | 0.933 | 0.124 |
| Tl <sub>9.0</sub> BiTe <sub>6.0</sub>                                                                    | 325  | 200.00  | 18091.00  | 5.000 | 0.047 |
| Cu <sub>2</sub> Se <sub>0.9</sub> S <sub>0.1</sub>                                                       | 707  | 186.63  | 22925.00  | 0.456 | 1.238 |
| Ag <sub>0.01</sub> Sn <sub>0.99</sub> Se <sub>0.8</sub> S <sub>0.2</sub>                                 | 813  | 326.92  | 2400.00   | 0.149 | 1.403 |
| ZrNiPb <sub>0.985</sub> Bi <sub>0.015</sub>                                                              | 673  | -149.80 | 194507.00 | 7.240 | 0.406 |
| K <sub>0.38</sub> Co <sub>4</sub> Sb <sub>12</sub>                                                       | 300  | -114    | 266000.00 | 4.700 | 0.200 |
| (Cu <sub>3</sub> SnS <sub>4</sub> ) <sub>0.915</sub> (Ga <sub>2</sub> Te <sub>3</sub> ) <sub>0.085</sub> | 405  | 58.08   | 168430.00 | 3.742 | 0.061 |
| Cu <sub>2</sub> Zn <sub>0.8</sub> Fe <sub>0.2</sub> SnSe <sub>4</sub>                                    | 773  | 313.22  | 2861.00   | 0.669 | 0.324 |
| Ag <sub>2</sub> Se                                                                                       | 297  | -132.99 | 180873.00 | 1.150 | 0.826 |
| Mg <sub>0.98</sub> Li <sub>0.02</sub> Ge <sub>0.9</sub> Si <sub>0.1</sub>                                | 600  | 288.59  | 16538.00  | 2.835 | 0.291 |

|                                                                                                          |     |         |           |       |       |
|----------------------------------------------------------------------------------------------------------|-----|---------|-----------|-------|-------|
| Ca <sub>14</sub> MgBi <sub>11</sub>                                                                      | 424 | 61.57   | 22052.00  | 0.839 | 0.042 |
| Cu <sub>2</sub> Se                                                                                       | 365 | 107.40  | 76750.00  | 0.670 | 0.482 |
| Cu <sub>5</sub> SnSbSe <sub>7</sub>                                                                      | 300 | 28.62   | 527826.00 | 5.267 | 0.025 |
| Yb <sub>10</sub> LaCdSb <sub>9</sub>                                                                     | 323 | 31.58   | 28782.00  | 0.887 | 0.010 |
| Li <sub>2</sub> Ge <sub>11</sub> Sb <sub>2</sub> Te <sub>15</sub>                                        | 523 | 157.40  | 128400.00 | 1.875 | 0.887 |
| Ba <sub>0.21</sub> In <sub>0.04</sub> Co <sub>4</sub> Sb <sub>11.93</sub>                                | 300 | -160    | 143400.00 | 2.500 | 0.300 |
| Bi <sub>0.92</sub> Pb <sub>0.04</sub> Yb <sub>0.04</sub> CuSeO                                           | 450 | 161.84  | 13617.00  | 0.645 | 0.249 |
| Eu <sub>2</sub> Zn <sub>0.96</sub> Sb <sub>2</sub>                                                       | 300 | 113.00  | 25918.00  | 0.540 | 0.184 |
| AgBi <sub>0.95</sub> Sb <sub>0.05</sub> Se <sub>2</sub>                                                  | 550 | 161.40  | 214.00    | 0.400 | 0.008 |
| (Cu <sub>3</sub> SnS <sub>4</sub> ) <sub>0.895</sub> (Ga <sub>2</sub> Te <sub>3</sub> ) <sub>0.105</sub> | 627 | 102.02  | 104440.00 | 2.275 | 0.300 |
| Ba <sub>0.99</sub> K <sub>0.01</sub> Zn <sub>2</sub> As <sub>2</sub>                                     | 723 | 210.49  | 19048.00  | 1.326 | 0.460 |
| Ba <sub>8.03</sub> Cu <sub>5</sub> Ge <sub>40.97</sub>                                                   | 809 | -163.00 | 27310.00  | 1.488 | 0.399 |
| LiGe <sub>3.5</sub> Sb <sub>2</sub> Te <sub>7</sub>                                                      | 373 | 201.80  | 28890.00  | 0.933 | 0.470 |
| PbTe                                                                                                     | 724 | -297.55 | 12039.00  | 1.194 | 0.646 |
| Zn <sub>0.875</sub> Cd <sub>0.125</sub> Sc <sub>0.02</sub> O <sub>1.03</sub>                             | 673 | -110.00 | 32860.00  | 3.830 | 0.070 |
| Ge <sub>0.6</sub> Sb <sub>0.2</sub> Te <sub>0.8</sub> (AgSnSe <sub>2</sub> ) <sub>0.2</sub>              | 423 | 159.00  | 54194.00  | 0.837 | 0.693 |
| Cu <sub>2</sub> Se <sub>0.92</sub> I <sub>0.08</sub>                                                     | 375 | 175.00  | 10900.00  | 0.385 | 0.325 |
| Co <sub>0.97</sub> Ni <sub>0.03</sub> GeTe                                                               | 478 | -109.15 | 76064.00  | 4.947 | 0.088 |
| Mg <sub>3.07</sub> Sb <sub>1.5</sub> Bi <sub>0.48</sub> Se <sub>0.02</sub>                               | 300 | -275.82 | 11040.00  | 0.797 | 0.316 |
| LiCo <sub>0.98</sub> Ni <sub>0.02</sub> O <sub>2</sub>                                                   | 523 | 995.86  | 0.10      | 2.409 | 0.000 |
| Cu <sub>2</sub> Se <sub>0.88</sub> S <sub>0.12</sub>                                                     | 303 | 106.58  | 69583.00  | 0.608 | 0.394 |
| Cu <sub>7</sub> PS <sub>6</sub>                                                                          | 673 | 281.55  | 501.00    | 0.207 | 0.129 |
| Mg <sub>3.07</sub> Sb <sub>1.5</sub> Bi <sub>0.45</sub> Se <sub>0.05</sub>                               | 600 | -304.57 | 10704.00  | 0.703 | 0.848 |
| (Cu <sub>0.003</sub> Pb <sub>0.997</sub> Te)(MnTe) <sub>0.03</sub>                                       | 823 | -201.40 | 45379.00  | 1.275 | 1.188 |
| Sr <sub>0.17</sub> Co <sub>4</sub> Sb <sub>12.88</sub>                                                   | 850 | -195    | 75500.00  | 2.000 | 0.700 |
| Ge <sub>0.55</sub> Pb <sub>0.45</sub> Te <sub>0.4</sub> Se <sub>0.6</sub>                                | 668 | 291.25  | 7971.00   | 0.685 | 0.768 |
| Mg <sub>2</sub> Zn <sub>0.96</sub> Sb <sub>2</sub>                                                       | 673 | 182.78  | 14934.00  | 0.846 | 0.397 |
| (SnTe) <sub>0.96</sub> (CuSbTe <sub>2</sub> ) <sub>0.04</sub>                                            | 620 | 88.19   | 177828.00 | 3.453 | 0.248 |
| La <sub>0.1</sub> Co <sub>4</sub> Sb <sub>12</sub>                                                       | 573 | 100.00  | 27600.00  | 3.657 | 0.043 |
| Zn <sub>0.9</sub> Cd <sub>0.1</sub> Sc <sub>0.04</sub> O <sub>1.06</sub>                                 | 673 | -119.00 | 34167.00  | 4.380 | 0.074 |
| (SnTe) <sub>0.98</sub> (CuSbTe <sub>2</sub> ) <sub>0.02</sub>                                            | 625 | 79.95   | 198708.00 | 4.025 | 0.197 |
| Cu <sub>5</sub> SnSbSe <sub>6.3</sub>                                                                    | 473 | 51.95   | 148276.00 | 2.379 | 0.080 |
| Ag <sub>0.97</sub> Cr <sub>0.99</sub> Bi <sub>0.01</sub> Se <sub>2</sub>                                 | 703 | 156.41  | 9792.00   | 0.388 | 0.434 |



|                                                                                                                     |      |         |           |        |       |
|---------------------------------------------------------------------------------------------------------------------|------|---------|-----------|--------|-------|
| Cu <sub>2</sub> SnS <sub>3</sub>                                                                                    | 723  | 411.00  | 276.00    | 0.792  | 0.043 |
| CuAgTe <sub>0.7</sub> Se <sub>0.3</sub>                                                                             | 422  | 249.18  | 6602.00   | 0.295  | 0.587 |
| Cr <sub>1.99</sub> Fe <sub>0.01</sub> Ge <sub>2</sub> Te <sub>6</sub>                                               | 320  | 500.00  | 109.38    | 0.834  | 0.010 |
| Mg <sub>2.975</sub> Na <sub>0.025</sub> Sb <sub>2</sub>                                                             | 473  | 109.00  | 41000.00  | 1.556  | 0.148 |
| Mg <sub>3.5</sub> Ho <sub>0.03</sub> Sb <sub>2</sub>                                                                | 600  | -283.33 | 10251.00  | 0.810  | 0.609 |
| Gd <sub>2</sub> Se <sub>2.94</sub>                                                                                  | 850  | -172.83 | 15250.00  | 1.162  | 0.333 |
| Mg <sub>2.16</sub> (Si <sub>0.4</sub> Sn <sub>0.6</sub> ) <sub>0.985</sub> Bi <sub>0.015</sub>                      | 600  | -198.00 | 104100.00 | 2.190  | 1.120 |
| Cu <sub>2.8</sub> Sn <sub>0.2</sub> Sb <sub>0.8</sub> Se <sub>3.8</sub>                                             | 622  | 72.57   | 219725.00 | 3.743  | 0.192 |
| In <sub>0.225</sub> Co <sub>4</sub> Sb <sub>11.925</sub>                                                            | 700  | -241    | 68000.00  | 1.600  | 1.100 |
| Cu <sub>2.88</sub> Ag <sub>0.12</sub> SbSe <sub>4</sub>                                                             | 548  | 379.00  | 7286.00   | 0.940  | 0.620 |
| Cu <sub>2</sub> S <sub>0.5</sub> Se <sub>0.5</sub>                                                                  | 475  | 214.14  | 1634.00   | 0.548  | 0.065 |
| Ge <sub>0.55</sub> Pb <sub>0.45</sub> Te <sub>0.8</sub> Se <sub>0.2</sub>                                           | 569  | 149.07  | 19544.00  | 1.124  | 0.240 |
| Sm <sub>0.15</sub> Co <sub>4</sub> Sb <sub>12</sub>                                                                 | 800  | -204    | 111000.00 | 1.100  | 1.300 |
| ZrNiSn                                                                                                              | 673  | -160.40 | 69790.00  | 3.491  | 0.346 |
| Cu <sub>0.99</sub> Pd <sub>0.01</sub> FeS <sub>2</sub>                                                              | 10   | -61.00  | 20.00     | 20.900 | 0.000 |
| Ag(Bi <sub>0.85</sub> Nb <sub>0.15</sub> ) <sub>0.7</sub> Sb <sub>0.3</sub> Se <sub>2</sub>                         | 378  | -163.00 | 8913.00   | 0.691  | 0.130 |
| AgCuSe                                                                                                              | 382  | -26.75  | 55856.00  | 1.946  | 0.008 |
| Cu <sub>10.5</sub> NiZn <sub>0.5</sub> Sb <sub>4</sub> S <sub>13</sub>                                              | 715  | 214.70  | 18500.00  | 0.549  | 1.025 |
| (Ag <sub>0.05</sub> Sb <sub>0.05</sub> Sn <sub>0.9</sub> )(S <sub>0.05</sub> Se <sub>0.05</sub> Te <sub>0.9</sub> ) | 755  | 140.00  | 101800.00 | 2.150  | 0.701 |
| (SnTe) <sub>0.98</sub> (CuSbTe <sub>2</sub> ) <sub>0.02</sub>                                                       | 818  | 158.52  | 98369.00  | 2.609  | 0.775 |
| Cu <sub>2</sub> SnSe <sub>3</sub>                                                                                   | 323  | 89.29   | 13265.00  | 2.826  | 0.012 |
| Mo <sub>3</sub> Sb <sub>7</sub> l <sub>0.75</sub>                                                                   | 323  | 17.40   | 624500.00 | 5.000  | 0.012 |
| Yb <sub>14</sub> MgSb <sub>11</sub>                                                                                 | 600  | 131.70  | 20500.00  | 0.810  | 0.263 |
| Ge <sub>9</sub> Sb <sub>2</sub> Te <sub>12</sub>                                                                    | 525  | 97.50   | 136364.00 | 2.758  | 0.247 |
| (SnTe) <sub>0.98</sub> (CuSbTe <sub>2</sub> ) <sub>0.02</sub>                                                       | 722  | 120.33  | 135007.00 | 3.093  | 0.456 |
| Cu <sub>7</sub> P(S <sub>0.5</sub> Se <sub>0.5</sub> ) <sub>6</sub>                                                 | 422  | 260.00  | 1250.00   | 0.260  | 0.137 |
| Ca <sub>5</sub> Ga <sub>1.7</sub> Zn <sub>0.3</sub> Sb <sub>6</sub>                                                 | 624  | 91.33   | 50000.00  | 1.436  | 0.185 |
| Al <sub>0.02</sub> Ge <sub>0.98</sub> Te                                                                            | 773  | 137.14  | 203571.00 | 3.232  | 0.875 |
| Cr <sub>1.99</sub> Mn <sub>0.01</sub> Ge <sub>2</sub> Te <sub>6</sub>                                               | 812  | 268.04  | 5437.50   | 0.633  | 0.501 |
| BaGd <sub>2</sub> NiO <sub>5</sub>                                                                                  | 1272 | 527.94  | 37.86     | 1.384  | 0.010 |
| Ca <sub>3.2</sub> Yb <sub>1.65</sub> Pr <sub>0.15</sub> Al <sub>2</sub> Sb <sub>6</sub>                             | 823  | 59.45   | 3688.00   | 1.502  | 0.008 |
| Ag <sub>0.97</sub> Cr <sub>0.95</sub> Sb <sub>0.05</sub> Se <sub>2</sub>                                            | 503  | 119.07  | 9792.00   | 0.507  | 0.138 |

|                                                                                            |      |         |           |       |       |
|--------------------------------------------------------------------------------------------|------|---------|-----------|-------|-------|
| YbCd <sub>2</sub> Sb <sub>2</sub>                                                          | 350  | 100.83  | 111511.00 | 1.625 | 0.244 |
| Ag <sub>0.97</sub> Cr <sub>0.97</sub> Sb <sub>0.03</sub> Se <sub>2</sub>                   | 603  | 128.81  | 17153.00  | 0.421 | 0.407 |
| Ag <sub>8</sub> Sn <sub>0.5</sub> Ga <sub>0.5</sub> Se <sub>6</sub>                        | 702  | -160.51 | 16667.00  | 0.286 | 1.136 |
| CuGa <sub>0.99</sub> Mn <sub>0.01</sub> Te <sub>2</sub>                                    | 768  | 236.00  | 26000.00  | 1.850 | 0.605 |
| Ag <sub>0.01</sub> Sn <sub>0.99</sub> Se                                                   | 813  | 301.28  | 2877.00   | 0.232 | 0.917 |
| Cu <sub>3</sub> SbS <sub>4</sub>                                                           | 323  | 497.00  | 1650.00   | 4.206 | 0.031 |
| Yb <sub>14</sub> MgBi <sub>11</sub>                                                        | 326  | 24.32   | 74112.00  | 1.539 | 0.009 |
| In <sub>4</sub> Pb <sub>0.01</sub> Sn <sub>0.03</sub> Se <sub>2.9</sub> Cl <sub>0.02</sub> | 373  | -224.00 | 8330.00   | 0.846 | 0.186 |
| La <sub>0.1</sub> Ca <sub>0.9</sub> TiO <sub>3</sub>                                       | 740  | -163.00 | 14520.00  | 3.028 | 0.094 |
| Ce <sub>0.75</sub> Fe <sub>3</sub> CoSb <sub>12</sub>                                      | 333  | 65.05   | 154146.00 | 7.961 | 0.027 |
| (Zn <sub>0.95</sub> In <sub>0.05</sub> ) <sub>4</sub> Sb <sub>3</sub>                      | 348  | 153.80  | 25400.00  | 0.850 | 0.246 |
| Ge <sub>1.04</sub> Te                                                                      | 623  | 176.00  | 144750.00 | 2.380 | 1.174 |
| (PbTe) <sub>0.05</sub> (Ag <sub>2</sub> Te) <sub>0.95</sub>                                | 600  | -175.20 | 20700.00  | 0.441 | 0.867 |
| Bi <sub>0.94</sub> Pb <sub>0.06</sub> CuSeO                                                | 100  | 46.91   | 136151.00 | 2.172 | 0.014 |
| Yb <sub>13.43</sub> Ce <sub>0.44</sub> Mn <sub>1.07</sub> Sb <sub>11.07</sub>              | 473  | 98.70   | 33440.00  | 0.720 | 0.214 |
| Ag <sub>2</sub> Se <sub>1.06</sub>                                                         | 362  | -137.80 | 129800.00 | 1.064 | 0.839 |
| Ag <sub>2</sub> Mo <sub>6</sub> Te <sub>8</sub>                                            | 600  | 17.65   | 195675.00 | 4.000 | 0.009 |
| Sr <sub>0.11</sub> Ba <sub>0.18</sub> Co <sub>4</sub> Sb <sub>12.09</sub>                  | 550  | -137.00 | 271364.00 | 4.000 | 0.700 |
| Mg <sub>1.98</sub> Li <sub>0.02</sub> Zn <sub>0.98</sub> Sb <sub>2</sub>                   | 773  | 157.67  | 38300.00  | 1.007 | 0.731 |
| (PbTe) <sub>0.05</sub> (Ag <sub>2</sub> Te) <sub>0.95</sub>                                | 650  | -198.00 | 13584.00  | 0.415 | 0.834 |
| BiSb(Se <sub>0.96</sub> Br <sub>0.04</sub> ) <sub>3</sub>                                  | 300  | -100.00 | 21000.00  | 0.650 | 0.120 |
| In <sub>3.99</sub> Pb <sub>0.01</sub> Se <sub>3</sub>                                      | 480  | -242.00 | 12247.00  | 0.910 | 0.378 |
| (SnTe) <sub>0.92</sub> (CuSbTe <sub>2</sub> ) <sub>0.08</sub>                              | 323  | 36.00   | 347600.00 | 3.925 | 0.037 |
| Cu <sub>5.133</sub> Sn <sub>1.866</sub> S <sub>7</sub>                                     | 667  | 59.09   | 219417.00 | 3.350 | 0.153 |
| Mg <sub>2</sub> Sn <sub>0.995</sub> Sb <sub>0.005</sub>                                    | 544  | -187.93 | 102632.00 | 4.113 | 0.479 |
| AgSb <sub>0.95</sub> Mn <sub>0.05</sub> Te <sub>2</sub>                                    | 394  | 92.17   | 72400.00  | 1.071 | 0.226 |
| (CaZn <sub>0.4</sub> Ag <sub>0.2</sub> Sb) <sub>0.83</sub> (LiZnSb) <sub>0.17</sub>        | 873  | 174.80  | 25048.00  | 0.575 | 1.162 |
| Ba <sub>7.97</sub> Ga <sub>15.95</sub> Sn <sub>30.07</sub>                                 | 580  | 334.50  | 11183.00  | 1.234 | 0.588 |
| Cu <sub>11.9</sub> Gd <sub>0.1</sub> Sb <sub>4</sub> S <sub>13</sub>                       | 327  | 78.34   | 108427.00 | 1.483 | 0.147 |
| Li <sub>1.01</sub> Co <sub>0.85</sub> Ni <sub>0.15</sub> O <sub>2</sub>                    | 1023 | 255.00  | 371.94    | 0.862 | 0.029 |
| CrSe <sub>3</sub>                                                                          | 725  | 159.15  | 21464.00  | 1.898 | 0.208 |
| Bi <sub>0.9</sub> Ag <sub>0.1</sub> CuSeO                                                  | 373  | 178.50  | 2351.00   | 0.555 | 0.050 |
| Mg <sub>3.5</sub> Gd <sub>0.04</sub> Sb <sub>1.97</sub> Te <sub>0.03</sub>                 | 600  | -238.57 | 18575.00  | 0.708 | 0.896 |

|                                                                                              |     |         |           |       |       |
|----------------------------------------------------------------------------------------------|-----|---------|-----------|-------|-------|
| Cu <sub>5</sub> SnSbSe <sub>7</sub>                                                          | 573 | 52.53   | 303478.00 | 4.285 | 0.112 |
| Mg <sub>2.16</sub> (Si <sub>0.4</sub> Sn <sub>0.6</sub> ) <sub>0.99</sub> Bi <sub>0.01</sub> | 600 | -220.50 | 77300.00  | 1.993 | 1.131 |
| In <sub>0.005</sub> Pb <sub>0.995</sub> Te <sub>0.999</sub> l <sub>0.001</sub>               | 428 | -260.70 | 18890.00  | 1.600 | 0.343 |
| Mg <sub>2</sub> Sn <sub>0.99</sub> Sb <sub>0.01</sub>                                        | 544 | -153.02 | 216814.00 | 4.648 | 0.594 |
| VFeSb                                                                                        | 600 | -203.80 | 67200.00  | 4.867 | 0.334 |
| EuZn <sub>2</sub> Sb <sub>2</sub>                                                            | 450 | 151.50  | 85000.00  | 1.800 | 0.488 |
| Ge <sub>0.99</sub> Te                                                                        | 623 | 120.00  | 289206.00 | 3.260 | 0.796 |
| Ge <sub>12</sub> Sb <sub>2</sub> Te <sub>15</sub>                                            | 373 | 175.70  | 35960.00  | 1.490 | 0.278 |
| Tl <sub>0.1</sub> Co <sub>4</sub> Sb <sub>12</sub>                                           | 150 | -98.30  | 124691.00 | 4.000 | 0.045 |
| Cu <sub>1.6</sub> S                                                                          | 500 | 28.35   | 360577.00 | 4.414 | 0.033 |
| As <sub>2</sub> Te <sub>2.9</sub> Se <sub>0.1</sub>                                          | 323 | 160.89  | 690.69    | 0.680 | 0.020 |
| Rb <sub>2</sub> Bi <sub>8</sub> Se <sub>12.961</sub>                                         | 625 | -242.80 | 6439.00   | 0.521 | 0.456 |
| (Cu) <sub>0.003</sub> Bi <sub>2</sub> Te <sub>3</sub>                                        | 519 | -162.26 | 81218.00  | 1.575 | 0.705 |
| Ag <sub>3.8</sub> Mo <sub>9</sub> Se <sub>11</sub>                                           | 350 | 92.40   | 35800.00  | 0.853 | 0.125 |
| Ca <sub>1.18</sub> Yb <sub>3.82</sub> Al <sub>1.84</sub> In <sub>0.16</sub> Sb <sub>6</sub>  | 423 | 29.01   | 32909.00  | 2.933 | 0.004 |
| AgBiSe <sub>2.0</sub>                                                                        | 757 | -233.00 | 6846.00   | 0.489 | 0.575 |
| TiNiSn                                                                                       | 398 | -174.92 | 48344.00  | 4.691 | 0.125 |
| Li <sub>0.02</sub> Cu <sub>1.85</sub> Se                                                     | 301 | 34.70   | 179808.00 | 2.746 | 0.024 |
| AgSbTe <sub>2</sub>                                                                          | 303 | 82.09   | 38533.00  | 0.976 | 0.081 |
| LiCo <sub>0.92</sub> Ni <sub>0.08</sub> O <sub>2</sub>                                       | 623 | 804.11  | 0.66      | 1.477 | 0.000 |
| (SnTe) <sub>40</sub> Sb <sub>2</sub> Te <sub>3</sub>                                         | 423 | 47.07   | 312102.00 | 5.089 | 0.057 |
| Mg <sub>1.98</sub> Ag <sub>0.02</sub> Zn <sub>0.98</sub> Sb <sub>2</sub>                     | 373 | 113.70  | 50794.00  | 1.000 | 0.245 |
| Cu <sub>26</sub> Ti <sub>2</sub> Sb <sub>4</sub> Ge <sub>2</sub> S <sub>32</sub>             | 400 | 136.60  | 53271.00  | 1.119 | 0.355 |
| Cu <sub>10.5</sub> Ni <sub>1.3</sub> Zn <sub>0.2</sub> Sb <sub>4</sub> S <sub>13</sub>       | 617 | 186.10  | 24450.00  | 0.700 | 0.746 |
| Bi <sub>0.92</sub> Pb <sub>0.08</sub> CuSeO                                                  | 150 | 57.22   | 142771.00 | 2.051 | 0.034 |
| Ge <sub>9</sub> Sb <sub>2</sub> Te <sub>12</sub>                                             | 423 | 77.28   | 173636.00 | 2.859 | 0.153 |
| (SnTe) <sub>0.84</sub> (CuSbTe <sub>2</sub> ) <sub>0.16</sub>                                | 325 | 35.99   | 347593.00 | 3.938 | 0.037 |
| CaTiO <sub>3</sub>                                                                           | 432 | -259.00 | 3600.00   | 4.030 | 0.026 |
| Ca <sub>5</sub> Ga <sub>1.95</sub> Zn <sub>0.05</sub> Sb <sub>6</sub>                        | 425 | 138.30  | 17900.00  | 1.186 | 0.121 |
| Nb <sub>0.8</sub> Ti <sub>0.2</sub> FeSb                                                     | 300 | 71.60   | 483350.00 | 4.540 | 0.090 |
| Li <sub>1.04</sub> Co <sub>0.85</sub> Ni <sub>0.15</sub> O <sub>2</sub>                      | 323 | 218.00  | 0.09      | 1.915 | 0.000 |
| CuAgTe <sub>0.5</sub> Se <sub>0.5</sub>                                                      | 363 | 137.50  | 9413.00   | 0.445 | 0.145 |
| BiCuSeO                                                                                      | 373 | 463.60  | 497.00    | 0.722 | 0.055 |

|                                                                                                                     |     |         |           |       |       |
|---------------------------------------------------------------------------------------------------------------------|-----|---------|-----------|-------|-------|
| Ag(Bi <sub>0.8</sub> Pb <sub>0.2</sub> ) <sub>0.9</sub> Sb <sub>0.1</sub> Se <sub>2</sub>                           | 326 | 130.56  | 412.46    | 0.468 | 0.005 |
| CuGa <sub>0.98</sub> Mn <sub>0.02</sub> Te <sub>2</sub>                                                             | 625 | 272.30  | 15350.00  | 3.844 | 0.185 |
| Cu <sub>26</sub> Ti <sub>2</sub> Sb <sub>4</sub> Ge <sub>2</sub> S <sub>32</sub>                                    | 308 | 115.98  | 59375.00  | 1.299 | 0.189 |
| Nb <sub>0.85</sub> Ta <sub>0.15</sub> CoSn <sub>0.9</sub> Sb <sub>0.1</sub>                                         | 430 | -114.42 | 121135.00 | 4.804 | 0.142 |
| Cu <sub>3</sub> ErTe <sub>3</sub>                                                                                   | 600 | 61.40   | 184000.00 | 1.740 | 0.239 |
| Cu <sub>7</sub> P(S <sub>0.6</sub> Se <sub>0.4</sub> ) <sub>6</sub>                                                 | 623 | 286.40  | 2255.00   | 0.220 | 0.524 |
| Mg <sub>0.97</sub> Li <sub>0.03</sub> Ge <sub>0.8</sub> Si <sub>0.2</sub>                                           | 600 | 319.46  | 12077.00  | 2.462 | 0.300 |
| Ag <sub>0.01</sub> Sn <sub>0.99</sub> Se <sub>0.9</sub> S <sub>0.1</sub>                                            | 813 | 310.68  | 2689.00   | 0.181 | 1.167 |
| (CaZn <sub>0.4</sub> Ag <sub>0.2</sub> Sb) <sub>0.95</sub> (LiZnSb) <sub>0.05</sub>                                 | 873 | 164.55  | 29279.00  | 0.794 | 0.872 |
| Co <sub>0.95</sub> Ni <sub>0.05</sub> GeTe                                                                          | 551 | -75.74  | 133862.00 | 4.969 | 0.085 |
| Se <sub>0.05</sub> Co <sub>4</sub> Sb <sub>11.9</sub> Se <sub>0.1</sub>                                             | 300 | -354    | 8200.00   | 4.100 | 0.100 |
| Ag <sub>3</sub> RbMo <sub>9</sub> Se <sub>11</sub>                                                                  | 618 | 142.70  | 10667.00  | 0.839 | 0.160 |
| TlCr <sub>5</sub> Se <sub>8</sub>                                                                                   | 823 | 295.00  | 5000.00   | 0.705 | 0.508 |
| Ca <sub>0.1</sub> BaGd <sub>1.9</sub> NiO <sub>5</sub>                                                              | 532 | 204.41  | 65.12     | 2.200 | 0.001 |
| Cu <sub>2</sub> Sn <sub>0.95</sub> Fe <sub>0.05</sub> Se <sub>3</sub>                                               | 623 | 103.62  | 75676.00  | 2.021 | 0.251 |
| Ti <sub>0.98</sub> Mn <sub>0.02</sub> NiSn <sub>0.98</sub> Sb <sub>0.02</sub>                                       | 498 | -143.30 | 158900.00 | 5.604 | 0.290 |
| Ag <sub>3</sub> RbMo <sub>9</sub> Se <sub>11</sub>                                                                  | 520 | 128.54  | 8050.00   | 0.767 | 0.090 |
| CuGa <sub>0.97</sub> Mn <sub>0.03</sub> Te <sub>2</sub>                                                             | 325 | 172.00  | 25200.00  | 6.142 | 0.039 |
| Cu <sub>1.975</sub> S <sub>0.5</sub> Se <sub>0.5</sub>                                                              | 578 | 133.33  | 39208.00  | 0.898 | 0.449 |
| (Ag <sub>0.15</sub> Sb <sub>0.15</sub> Sn <sub>0.7</sub> )(S <sub>0.15</sub> Se <sub>0.15</sub> Te <sub>0.7</sub> ) | 303 | 77.03   | 81308.00  | 1.270 | 0.115 |
| Ta <sub>0.92</sub> Ti <sub>0.08</sub> FeSb                                                                          | 304 | 135.00  | 277000.00 | 6.620 | 0.232 |
| CsSm <sub>2</sub> Ag <sub>3</sub> Te <sub>5</sub>                                                                   | 298 | -90.28  | 83.82     | 0.663 | 0.000 |
| Se <sub>0.03</sub> Co <sub>4</sub> Sb <sub>11.94</sub> Se <sub>0.06</sub>                                           | 800 | -152    | 21500.00  | 3.700 | 0.100 |
| Cu <sub>3</sub> Sb <sub>0.998</sub> In <sub>0.002</sub> Se <sub>4</sub>                                             | 423 | 303.00  | 4810.00   | 1.650 | 0.113 |
| Bi <sub>0.95</sub> Ba <sub>0.05</sub> CuSeO                                                                         | 319 | 232.10  | 6796.00   | 0.930 | 0.126 |
| Eu(Zn <sub>0.9</sub> Cd <sub>0.1</sub> ) <sub>2</sub> Sb <sub>2</sub>                                               | 500 | 172.50  | 74560.00  | 1.615 | 0.687 |
| Rb <sub>2</sub> Bi <sub>8</sub> Se <sub>12.9805</sub>                                                               | 823 | -214.20 | 7045.00   | 0.569 | 0.468 |
| Ge <sub>0.99</sub> Te                                                                                               | 423 | 58.00   | 512635.00 | 4.720 | 0.155 |
| Ca <sub>1.14</sub> Yb <sub>3.86</sub> Al <sub>1.68</sub> In <sub>0.32</sub> Sb <sub>6</sub>                         | 428 | 174.59  | 7006.00   | 0.942 | 0.096 |
| Ag <sub>0.97</sub> Cr <sub>0.95</sub> Bi <sub>0.05</sub> Se <sub>2</sub>                                            | 403 | 97.03   | 14780.00  | 0.472 | 0.119 |
| Ag <sub>2</sub> Se <sub>1.01</sub>                                                                                  | 334 | -138.72 | 125902.00 | 1.066 | 0.759 |
| Mg <sub>2</sub> Zn <sub>1.02</sub> Sb <sub>2</sub>                                                                  | 773 | 109.93  | 11118.00  | 1.161 | 0.089 |

|                                                                           |     |         |           |       |       |
|---------------------------------------------------------------------------|-----|---------|-----------|-------|-------|
| Ag <sub>8</sub> Sn <sub>0.4</sub> Ga <sub>0.6</sub> Se <sub>6</sub>       | 376 | -530.00 | 132.00    | 0.225 | 0.067 |
| Cu <sub>3</sub> SbS <sub>4</sub>                                          | 473 | 603.30  | 316.20    | 1.024 | 0.053 |
| BaBiTe <sub>2.9</sub> Se <sub>0.1</sub>                                   | 597 | -204.00 | 3840.00   | 0.397 | 0.240 |
| FeNb <sub>0.88</sub> Hf <sub>0.12</sub> Sb                                | 900 | 210.44  | 127900.00 | 4.576 | 1.128 |
| LiCo <sub>0.98</sub> Ni <sub>0.02</sub> O <sub>2</sub>                    | 723 | 800.00  | 6.72      | 2.068 | 0.002 |
| Cu <sub>2.88</sub> Ag <sub>0.12</sub> SbSe <sub>4</sub>                   | 448 | 410.00  | 6667.00   | 1.190 | 0.422 |
| Hf <sub>0.5</sub> Ti <sub>0.5</sub> CoSb <sub>0.8</sub> Sn <sub>0.2</sub> | 377 | 194.40  | 42150.00  | 2.512 | 0.239 |
| Ba <sub>8</sub> Cu <sub>5</sub> Si <sub>25</sub> Ge <sub>16</sub>         | 564 | -91.00  | 88700.00  | 1.895 | 0.219 |
| Sn <sub>0.96</sub> Pb <sub>0.03</sub> Zn <sub>0.01</sub> Se               | 673 | 520.21  | 872.00    | 0.471 | 0.337 |
| In <sub>3.96</sub> Pb <sub>0.04</sub> Se <sub>3</sub>                     | 518 | -272.00 | 9500.00   | 0.860 | 0.423 |
| Li <sub>2</sub> Ge <sub>11</sub> Sb <sub>2</sub> Te <sub>15</sub>         | 723 | 198.00  | 86517.00  | 1.696 | 1.446 |
| Al <sub>0.0075</sub> Sb <sub>0.1</sub> Ge <sub>0.8925</sub> Te            | 673 | 244.35  | 54699.00  | 1.460 | 1.573 |
| Cu <sub>2.025</sub> Cd <sub>0.975</sub> SnSe <sub>4</sub>                 | 400 | 179.30  | 6175.00   | 1.875 | 0.042 |
| Ca <sub>5</sub> Al <sub>1.9</sub> Zn <sub>0.1</sub> Sb <sub>6</sub>       | 724 | 162.73  | 17153.00  | 1.019 | 0.323 |
| Sr <sub>0.21</sub> Yb <sub>0.03</sub> Co <sub>4</sub> Sb <sub>12.12</sub> | 350 | -119.00 | 315000.00 | 4.080 | 0.383 |
| Cu <sub>7</sub> P(S <sub>0.55</sub> Se <sub>0.45</sub> ) <sub>6</sub>     | 422 | 282.00  | 875.00    | 0.227 | 0.130 |
| Ge <sub>0.55</sub> Pb <sub>0.45</sub> Te <sub>0.2</sub> Se <sub>0.8</sub> | 370 | 391.25  | 2821.00   | 0.742 | 0.039 |
| La <sub>0.25</sub> Ca <sub>0.75</sub> TiO <sub>3</sub>                    | 740 | -126.60 | 47311.00  | 2.965 | 0.189 |
| Yb <sub>10</sub> LaCdSb <sub>9</sub>                                      | 673 | 52.14   | 29695.00  | 0.882 | 0.062 |
| Cu <sub>2</sub> Se <sub>0.94</sub> S <sub>0.06</sub>                      | 303 | 92.00   | 117606.00 | 0.788 | 0.370 |
| Pb <sub>0.97</sub> Tl <sub>0.015</sub> Na <sub>0.015</sub> Te             | 497 | 192.86  | 54450.00  | 1.411 | 0.713 |
| Ba <sub>8.07</sub> Cu <sub>4.89</sub> Si <sub>41.03</sub>                 | 713 | -87.00  | 110000.00 | 2.800 | 0.210 |
| Ag <sub>2.0</sub> Se <sub>0.8</sub> Te <sub>0.2</sub>                     | 390 | -128.00 | 102110.00 | 0.857 | 0.761 |
| K <sub>8</sub> Al <sub>8</sub> Ge <sub>38</sub>                           | 200 | -19.80  | 43650.00  | 1.035 | 0.003 |
| Ge <sub>0.87</sub> In <sub>0.05</sub> Pb <sub>0.08</sub> Te               | 325 | 162.02  | 52752.00  | 1.160 | 0.388 |
| SnTe <sub>0.25</sub> AgSbSe <sub>2</sub>                                  | 500 | 109.20  | 94295.00  | 1.710 | 0.329 |
| (CuI) <sub>0.003</sub> Bi <sub>2</sub> Te <sub>3</sub>                    | 325 | -156.98 | 132444.00 | 1.407 | 0.754 |
| Mg <sub>2.994</sub> Na <sub>0.006</sub> Sb <sub>2</sub>                   | 323 | 123.48  | 13097.00  | 1.514 | 0.043 |
| Cu <sub>1.925</sub> Ag <sub>0.075</sub> SnSe <sub>3</sub>                 | 800 | 209.09  | 8788.00   | 0.549 | 0.560 |
| VFeSb                                                                     | 800 | -146.40 | 51807.00  | 4.048 | 0.203 |
| Ge <sub>0.55</sub> Pb <sub>0.45</sub> Te                                  | 571 | 101.24  | 38462.00  | 2.250 | 0.100 |
| In <sub>4</sub> Se <sub>2.32</sub> Cl <sub>0.03</sub>                     | 673 | -306.10 | 11180.00  | 0.725 | 0.973 |
| GeTe                                                                      | 525 | 67.33   | 310811.00 | 4.281 | 0.173 |

|                                                                             |      |         |           |       |       |
|-----------------------------------------------------------------------------|------|---------|-----------|-------|-------|
| Co <sub>0.95</sub> Ni <sub>0.05</sub> GeTe                                  | 478  | -66.38  | 144444.00 | 5.252 | 0.058 |
| Yb <sub>0.20</sub> Co <sub>4</sub> Sb <sub>12</sub>                         | 300  | -139    | 149000.00 | 2.100 | 0.300 |
| Bi <sub>1.2</sub> Sb <sub>0.8</sub> Se <sub>2.88</sub> Cl <sub>0.12</sub>   | 300  | -97.00  | 29670.00  | 0.820 | 0.102 |
| Ca <sub>0.2</sub> BaGd <sub>1.8</sub> NiO <sub>5</sub>                      | 897  | 149.26  | 323.45    | 1.579 | 0.004 |
| FeVSb                                                                       | 700  | -238.00 | 44000.00  | 6.300 | 0.266 |
| Sr <sub>0.28</sub> Co <sub>4</sub> Sb <sub>12.88</sub>                      | 850  | -176    | 111000.00 | 1.400 | 0.900 |
| Cu <sub>2</sub> Zn <sub>0.4</sub> Fe <sub>0.6</sub> SnSe <sub>4</sub>       | 773  | 229.48  | 7136.00   | 0.713 | 0.408 |
| Ta <sub>0.74</sub> V <sub>0.1</sub> Ti <sub>0.16</sub> FeSb                 | 304  | 116.00  | 283220.00 | 2.330 | 0.290 |
| Cu <sub>2</sub> Sn <sub>0.9</sub> Zn <sub>0.1</sub> S <sub>3</sub>          | 623  | 125.00  | 36100.00  | 1.160 | 0.303 |
| Cu <sub>1.8</sub> Se                                                        | 572  | 45.05   | 383784.00 | 4.584 | 0.097 |
| Al <sub>0.01</sub> Ge <sub>0.99</sub> Te                                    | 823  | 156.43  | 171429.00 | 2.960 | 1.052 |
| Bi <sub>0.9</sub> Pb <sub>0.1</sub> CuSeO                                   | 100  | 40.98   | 189824.00 | 2.166 | 0.015 |
| Ba <sub>8.02</sub> Cu <sub>5.04</sub> Si <sub>6</sub> Ge <sub>34.93</sub>   | 716  | -130.20 | 47500.00  | 1.330 | 0.434 |
| Ag <sub>8</sub> Sn <sub>0.7</sub> Ga <sub>0.3</sub> Se <sub>6</sub>         | 694  | -139.50 | 19210.00  | 0.385 | 0.675 |
| Cu <sub>2</sub> ZnSn <sub>0.98</sub> Ag <sub>0.02</sub> Se <sub>4</sub>     | 373  | 78.41   | 38847.00  | 3.836 | 0.023 |
| Nb <sub>0.75</sub> Ta <sub>0.25</sub> CoSn <sub>0.9</sub> Sb <sub>0.1</sub> | 628  | -149.23 | 96028.00  | 4.186 | 0.321 |
| YbCd <sub>1.4</sub> Zn <sub>0.6</sub> Sb <sub>2</sub>                       | 450  | 157.10  | 63012.00  | 1.460 | 0.498 |
| Ca <sub>3</sub> Co <sub>4</sub> O <sub>9</sub>                              | 300  | 122.30  | 6493.00   | 2.873 | 0.010 |
| NbCo <sub>0.92</sub> Ni <sub>0.08</sub> Sn                                  | 382  | -75.00  | 165476.00 | 9.452 | 0.038 |
| Cu <sub>1.5</sub> S                                                         | 400  | 15.57   | 552885.00 | 4.986 | 0.011 |
| In <sub>0.30</sub> Co <sub>4</sub> Sb <sub>11.90</sub>                      | 300  | -162    | 137000.00 | 2.000 | 0.400 |
| Bi <sub>1.94</sub> Nb <sub>0.06</sub> Te <sub>3</sub>                       | 426  | -107.14 | 72353.00  | 0.861 | 0.411 |
| Se <sub>0.17</sub> Co <sub>4</sub> Sb <sub>11.31</sub> Te <sub>0.53</sub>   | 300  | -142    | 106000.00 | 2.400 | 0.200 |
| As <sub>2</sub> Te <sub>2.3</sub> Se <sub>0.7</sub>                         | 423  | 338.80  | 257.50    | 0.465 | 0.028 |
| Ca <sub>0.1</sub> BaGd <sub>1.9</sub> NiO <sub>5</sub>                      | 1134 | 185.29  | 238.81    | 1.757 | 0.005 |
| (SnTe) <sub>0.88</sub> (CuSbTe <sub>2</sub> ) <sub>0.12</sub>               | 525  | 83.52   | 169964.00 | 2.770 | 0.225 |
| Ba <sub>1.9</sub> Bi <sub>0.1</sub> CoRuO <sub>6</sub>                      | 618  | 15.00   | 334375.00 | 1.310 | 0.035 |
| AgCuTe                                                                      | 422  | 120.00  | 24175.00  | 0.600 | 0.245 |
| Sr <sub>0.21</sub> Co <sub>4</sub> Sb <sub>12.25</sub>                      | 750  | -192.00 | 128182.00 | 3.650 | 0.971 |
| Ag <sub>3.8</sub> Mo <sub>9</sub> Se <sub>11</sub>                          | 447  | 118.00  | 30300.00  | 0.840 | 0.223 |
| CoSb <sub>3.0</sub>                                                         | 423  | -200.00 | 2941.00   | 5.400 | 0.009 |
| Ba <sub>0.11</sub> Yb <sub>0.03</sub> Co <sub>4</sub> Sb <sub>12</sub>      | 300  | -114.80 | 178700.00 | 3.203 | 0.215 |
| Ag <sub>3</sub> RbMo <sub>9</sub> Se <sub>11</sub>                          | 421  | 96.04   | 5926.00   | 0.714 | 0.032 |

|                                                                                                                 |      |         |           |        |       |
|-----------------------------------------------------------------------------------------------------------------|------|---------|-----------|--------|-------|
| Pb <sub>0.975</sub> Zn <sub>0.04</sub> Te                                                                       | 724  | -253.30 | 28030.00  | 1.164  | 1.121 |
| Ag <sub>3.4</sub> Mo <sub>9</sub> Se <sub>11</sub>                                                              | 645  | 119.60  | 36750.00  | 1.155  | 0.287 |
| Tl <sub>9.0</sub> Sb <sub>0.99</sub> Te <sub>6</sub>                                                            | 325  | 122.00  | 44770.00  | 0.710  | 0.305 |
| Tl <sub>4</sub> PbTe <sub>3</sub>                                                                               | 573  | 166.00  | 14500.00  | 0.545  | 0.426 |
| Ag(Bi <sub>0.85</sub> Nb <sub>0.15</sub> ) <sub>0.9</sub> Sb <sub>0.1</sub> Se <sub>2</sub>                     | 576  | -152.00 | 17433.00  | 0.528  | 0.440 |
| Mg <sub>0.98</sub> Li <sub>0.02</sub> Ge <sub>0.8</sub> Si <sub>0.2</sub>                                       | 600  | 337.50  | 6300.00   | 2.399  | 0.179 |
| Gd <sub>2.75</sub> Se <sub>4</sub>                                                                              | 450  | -122.10 | 7610.00   | 0.838  | 0.061 |
| NbCoSn                                                                                                          | 970  | -230.90 | 32430.00  | 7.345  | 0.228 |
| ZrNiPb <sub>0.98</sub> Bi <sub>0.02</sub>                                                                       | 303  | -89.80  | 394700.00 | 10.836 | 0.089 |
| AgMo <sub>6</sub> Te <sub>8</sub>                                                                               | 400  | 6.11    | 169860.00 | 3.944  | 0.001 |
| Mg <sub>3</sub> Sb <sub>1.6</sub> Bi <sub>0.4</sub>                                                             | 470  | 211.00  | 2500.00   | 0.660  | 0.079 |
| Ge <sub>0.87</sub> Mn <sub>0.05</sub> Sb <sub>0.08</sub> Te                                                     | 698  | 210.00  | 76289.00  | 1.489  | 1.577 |
| (SnTe) <sub>10</sub> Sb <sub>2</sub> Te <sub>3</sub>                                                            | 323  | 74.75   | 192500.00 | 2.370  | 0.147 |
| Pb <sub>0.9825</sub> Tl <sub>0.0075</sub> Na <sub>0.01</sub> Te                                                 | 597  | 229.74  | 45238.00  | 1.294  | 1.101 |
| Mg <sub>2.16</sub> (Si <sub>0.4</sub> Sn <sub>0.6</sub> ) <sub>0.985</sub> Bi <sub>0.015</sub>                  | 700  | -213.70 | 88200.00  | 2.190  | 1.287 |
| Zn <sub>0.9</sub> Cd <sub>0.1</sub> Sc <sub>0.02</sub> O <sub>1.03</sub>                                        | 300  | -70.60  | 59430.00  | 7.830  | 0.011 |
| ZrNiSn                                                                                                          | 474  | -132.87 | 47448.00  | 3.744  | 0.106 |
| (Ag <sub>0.1</sub> Sb <sub>0.1</sub> Sn <sub>0.8</sub> )(S <sub>0.1</sub> Se <sub>0.1</sub> Te <sub>0.8</sub> ) | 434  | 98.02   | 112150.00 | 1.703  | 0.275 |
| Mg <sub>3.5</sub> Gd <sub>0.03</sub> Sb <sub>2</sub>                                                            | 700  | -291.90 | 11122.00  | 0.655  | 1.012 |
| LaCo <sub>0.8</sub> (Ni <sub>0.5</sub> Fe <sub>0.5</sub> ) <sub>0.2</sub> O <sub>3</sub>                        | 300  | 234.00  | 1380.00   | 0.157  | 0.158 |
| Cu <sub>2</sub> Se <sub>0.7</sub> S <sub>0.3</sub>                                                              | 426  | 51.00   | 140857.00 | 1.389  | 0.112 |
| Ag(Bi <sub>0.9</sub> Nb <sub>0.1</sub> ) <sub>0.7</sub> Sb <sub>0.3</sub> Se <sub>2</sub>                       | 326  | -168.00 | 5623.00   | 0.552  | 0.094 |
| Zn <sub>2</sub> Cu <sub>3</sub> In <sub>3</sub> Te <sub>8</sub>                                                 | 330  | 132.40  | 20300.00  | 3.250  | 0.037 |
| Mg <sub>0.99</sub> Li <sub>0.01</sub> Ge <sub>0.9</sub> Si <sub>0.1</sub>                                       | 400  | 292.28  | 10692.00  | 4.352  | 0.084 |
| Ca <sub>3</sub> Co <sub>3.9</sub> Ti <sub>0.1</sub> O <sub>9</sub>                                              | 900  | 206.00  | 7059.00   | 2.120  | 0.127 |
| Yb <sub>0.40</sub> Co <sub>4</sub> Sb <sub>12</sub>                                                             | 823  | -183    | 141000.00 | 1.400  | 1.100 |
| GeSe <sub>0.5</sub> Te <sub>0.5</sub>                                                                           | 678  | 111.00  | 144776.00 | 2.612  | 0.463 |
| In <sub>4</sub> Pb <sub>0.01</sub> Sn <sub>0.03</sub> Se <sub>2.9</sub> Cl <sub>0.02</sub>                      | 723  | -260.12 | 13830.00  | 0.562  | 1.204 |
| Cu <sub>1.9</sub> Ag <sub>0.1</sub> SnSe <sub>3</sub>                                                           | 800  | 287.88  | 3612.00   | 0.413  | 0.580 |
| Ca <sub>3.2</sub> Yb <sub>1.65</sub> Pr <sub>0.15</sub> Al <sub>2</sub> Sb <sub>6</sub>                         | 623  | 51.22   | 4000.00   | 1.456  | 0.004 |
| Cu <sub>2.1</sub> Cd <sub>0.9</sub> SnSe <sub>4</sub>                                                           | 350  | 132.00  | 21034.00  | 1.713  | 0.075 |
| ZrNiPb <sub>0.995</sub> Bi <sub>0.005</sub>                                                                     | 771  | -214.00 | 78390.00  | 6.281  | 0.441 |
| Ca <sub>3</sub> Co <sub>3.7</sub> Ti <sub>0.3</sub> O <sub>9</sub>                                              | 1000 | 281.00  | 6050.00   | 1.790  | 0.280 |

|                                                                                                        |      |         |           |        |       |
|--------------------------------------------------------------------------------------------------------|------|---------|-----------|--------|-------|
| Mg <sub>2</sub> Zn <sub>1.04</sub> Sb <sub>2</sub>                                                     | 373  | 317.76  | 596.00    | 0.666  | 0.034 |
| FeNb <sub>0.92</sub> Hf <sub>0.08</sub> Sb                                                             | 300  | 116.26  | 345736.00 | 9.458  | 0.148 |
| Ce <sub>0.2</sub> Bi <sub>1.8</sub> Te <sub>3</sub>                                                    | 398  | -146.50 | 77900.00  | 0.514  | 1.293 |
| Ge <sub>0.55</sub> Pb <sub>0.45</sub> Te <sub>0.2</sub> Se <sub>0.8</sub>                              | 668  | 225.00  | 4622.00   | 0.848  | 0.135 |
| Yb <sub>13.49</sub> Ce <sub>0.39</sub> Mn <sub>1.05</sub> Sb <sub>11.08</sub>                          | 573  | 125.40  | 27151.00  | 0.758  | 0.323 |
| Ge <sub>12</sub> Sb <sub>2</sub> Te <sub>15</sub>                                                      | 623  | 238.00  | 51700.00  | 1.530  | 1.195 |
| Co <sub>4</sub> Sb <sub>11.95</sub> Te <sub>0.05</sub>                                                 | 600  | -310    | 27700.00  | 3.700  | 0.400 |
| FeNb <sub>0.9</sub> Zr <sub>0.1</sub> Sb                                                               | 400  | 134.70  | 311628.00 | 10.847 | 0.209 |
| (Cu <sub>3</sub> SnS <sub>4</sub> ) <sub>0.85</sub> (Ga <sub>2</sub> Te <sub>3</sub> ) <sub>0.15</sub> | 527  | 123.23  | 41941.00  | 1.434  | 0.234 |
| CaZn <sub>0.4</sub> Ag <sub>0.2</sub> Sb                                                               | 773  | 139.70  | 37901.00  | 0.922  | 0.620 |
| Ag <sub>0.04</sub> Cr <sub>1.96</sub> Se <sub>3</sub>                                                  | 566  | 145.00  | 28286.00  | 1.492  | 0.226 |
| Ag <sub>8</sub> GeTe <sub>6</sub>                                                                      | 509  | 366.40  | 776.00    | 0.283  | 0.189 |
| SnTe <sub>0.25</sub> AgSbSe <sub>2</sub>                                                               | 400  | 85.60   | 113800.00 | 1.832  | 0.190 |
| Cu <sub>2.1</sub> Cd <sub>0.9</sub> SnSe <sub>4</sub>                                                  | 550  | 143.80  | 24080.00  | 0.835  | 0.328 |
| ZnSc <sub>0.02</sub> O <sub>1.03</sub>                                                                 | 973  | -270.60 | 5857.00   | 8.083  | 0.052 |
| Bi <sub>0.92</sub> Ag <sub>0.08</sub> CuSeO                                                            | 373  | 194.00  | 2190.00   | 0.525  | 0.059 |
| Sn <sub>1.03</sub> Se <sub>0.08</sub> Te <sub>0.92</sub>                                               | 723  | 129.70  | 89474.00  | 2.695  | 0.404 |
| Ca <sub>1.11</sub> Yb <sub>3.89</sub> Al <sub>2</sub> Sb <sub>5.77</sub> Ge <sub>0.23</sub>            | 661  | 63.30   | 22600.00  | 1.835  | 0.033 |
| Cu <sub>2</sub> Se <sub>0.94</sub> S <sub>0.06</sub>                                                   | 550  | 165.46  | 39019.00  | 0.812  | 0.724 |
| Zn <sub>0.95</sub> Cd <sub>0.05</sub> Sc <sub>0.02</sub> O <sub>1.03</sub>                             | 1173 | -160.00 | 10100.00  | 3.430  | 0.088 |
| Mg <sub>0.98</sub> Li <sub>0.02</sub> Ge <sub>0.8</sub> Si <sub>0.2</sub>                              | 500  | 360.40  | 3846.00   | 2.748  | 0.091 |
| Ag <sub>0.5</sub> Sb <sub>1.1</sub> Pb <sub>19.6</sub> Te <sub>18.8</sub>                              | 673  | -133.00 | 42000.00  | 1.443  | 0.346 |
| Ba <sub>0.07</sub> Co <sub>4</sub> Sb <sub>11.88</sub>                                                 | 850  | -192    | 56700.00  | 3.500  | 0.400 |
| In <sub>4</sub> Se <sub>2.32</sub> Cl <sub>0.03</sub>                                                  | 698  | -311.00 | 10860.00  | 0.705  | 1.040 |
| (Zn <sub>0.95</sub> In <sub>0.05</sub> ) <sub>4</sub> Sb <sub>3</sub>                                  | 398  | 163.20  | 24034.00  | 0.830  | 0.307 |
| Ga <sub>0.10</sub> Co <sub>4</sub> Sb <sub>11.95</sub> Ga <sub>0.05</sub>                              | 300  | -228.6  | 44400.00  | 3.200  | 0.200 |
| Cu <sub>2</sub> Se                                                                                     | 410  | 85.00   | 55023.00  | 0.859  | 0.190 |
| Bi <sub>0.92</sub> Pb <sub>0.04</sub> Yb <sub>0.04</sub> CuSeO                                         | 645  | 207.89  | 8225.00   | 0.507  | 0.452 |
| Hf <sub>0.8</sub> Ti <sub>0.2</sub> CoSb <sub>0.8</sub> Sn <sub>0.2</sub>                              | 784  | 225.20  | 48511.00  | 2.676  | 0.721 |
| Cu <sub>2</sub> Se <sub>0.96</sub> I <sub>0.04</sub>                                                   | 359  | 115.00  | 40033.00  | 0.410  | 0.464 |
| AgSb <sub>0.95</sub> Mn <sub>0.05</sub> Te <sub>2</sub>                                                | 444  | 108.42  | 66133.00  | 1.082  | 0.319 |
| Li <sub>0.03</sub> Cu <sub>1.83</sub> Bi <sub>0.02</sub> Se                                            | 606  | 60.72   | 171264.00 | 2.089  | 0.183 |
| BaZn <sub>2</sub> As <sub>2</sub>                                                                      | 423  | 230.00  | 5677.00   | 1.482  | 0.086 |



|                                                                                |     |         |           |       |       |
|--------------------------------------------------------------------------------|-----|---------|-----------|-------|-------|
| Cu <sub>1.99</sub> In <sub>0.01</sub> Se                                       | 770 | 224.26  | 25000.00  | 0.800 | 1.210 |
| Ba <sub>0.11</sub> Yb <sub>0.08</sub> Co <sub>4</sub> Sb <sub>12</sub>         | 400 | -127.00 | 177300.00 | 2.420 | 0.473 |
| (SnTe) <sub>0.88</sub> (CuSbTe <sub>2</sub> ) <sub>0.12</sub>                  | 726 | 148.90  | 96764.00  | 2.050 | 0.760 |
| Bi <sub>1.2</sub> Sb <sub>0.8</sub> Se <sub>2.82</sub> Cl <sub>0.18</sub>      | 600 | -168.00 | 17680.00  | 0.660 | 0.454 |
| Zn <sub>0.9</sub> Cd <sub>0.1</sub> Sc <sub>0.03</sub> O <sub>1.045</sub>      | 473 | -92.70  | 48333.00  | 5.620 | 0.035 |
| Cu <sub>7</sub> PS <sub>6</sub>                                                | 422 | 125.00  | 6.62      | 0.202 | 0.000 |
| Ag <sub>0.98</sub> Nb <sub>0.02</sub> BiSe <sub>2.0</sub>                      | 625 | -225.00 | 6432.00   | 0.474 | 0.429 |
| Ca <sub>9</sub> Yb <sub>2</sub> Sb <sub>10</sub>                               | 701 | 15.10   | 50204.00  | 1.055 | 0.008 |
| Cu <sub>7</sub> P(S <sub>0.5</sub> Se <sub>0.5</sub> ) <sub>6</sub>            | 623 | 264.50  | 4604.00   | 0.289 | 0.694 |
| (SnTe) <sub>0.86</sub> (CuSbTe <sub>2</sub> ) <sub>0.14</sub>                  | 818 | 148.00  | 91300.00  | 1.830 | 0.894 |
| SnTe                                                                           | 421 | 20.70   | 553846.00 | 6.947 | 0.014 |
| Ca <sub>2</sub> Yb <sub>9</sub> Sb <sub>9</sub> Ge                             | 327 | 17.04   | 889.80    | 1.637 | 0.000 |
| MgAgSb <sub>0.99</sub> In <sub>0.01</sub>                                      | 300 | 155.45  | 79820.00  | 1.146 | 0.505 |
| Mg <sub>2</sub> Zn <sub>1.04</sub> Sb <sub>2</sub>                             | 300 | 433.55  | 430.00    | 0.717 | 0.034 |
| GeSe <sub>0.6</sub> Te <sub>0.4</sub>                                          | 320 | 51.13   | 203731.00 | 2.956 | 0.058 |
| Mg <sub>3.5</sub> Gd <sub>0.01</sub> Sb <sub>2</sub>                           | 400 | -254.23 | 6918.00   | 1.011 | 0.177 |
| Al <sub>0.02</sub> Ge <sub>0.98</sub> Te                                       | 573 | 93.75   | 287500.00 | 4.333 | 0.334 |
| In <sub>0.005</sub> Pb <sub>0.995</sub> Te <sub>0.994</sub> I <sub>0.006</sub> | 663 | -162.20 | 43010.00  | 1.413 | 0.528 |
| In <sub>0.01</sub> Pb <sub>0.99</sub> Te <sub>0.998</sub> I <sub>0.002</sub>   | 481 | -253.00 | 20500.00  | 1.512 | 0.417 |
| CuGa <sub>0.98</sub> Mn <sub>0.02</sub> Te <sub>2</sub>                        | 525 | 300.00  | 9123.00   | 3.355 | 0.128 |
| Nd <sub>2.84</sub> Te <sub>4</sub>                                             | 973 | -135.00 | 47400.00  | 1.490 | 0.564 |
| Cu <sub>10.5</sub> Ni <sub>1.5</sub> Sb <sub>4</sub> S <sub>13</sub>           | 517 | 172.60  | 23550.00  | 0.716 | 0.507 |
| Ba <sub>0.11</sub> Yb <sub>0.08</sub> Co <sub>4</sub> Sb <sub>12.08</sub>      | 800 | -177    | 112000.00 | 0.500 | 1.200 |
| CsSm <sub>2</sub> Ag <sub>3</sub> Te <sub>5</sub>                              | 462 | 177.78  | 95.59     | 0.521 | 0.003 |
| Pb <sub>0.975</sub> Zn <sub>0.04</sub> Te                                      | 423 | -191.50 | 68450.00  | 1.940 | 0.547 |
| Bi <sub>2.0</sub> S <sub>2.91</sub> Se <sub>0.09</sub>                         | 323 | -461.00 | 623.00    | 0.815 | 0.052 |
| Mg <sub>3</sub> Sb <sub>1.8</sub> Bi <sub>0.2</sub>                            | 565 | 386.00  | 865.00    | 0.740 | 0.098 |
| Cu <sub>2</sub> Se <sub>0.7</sub> S <sub>0.3</sub>                             | 613 | 101.98  | 69143.00  | 0.941 | 0.468 |
| Li <sub>2</sub> Ge <sub>3</sub> Sb <sub>2</sub> Te <sub>7</sub>                | 623 | 248.60  | 26940.00  | 0.782 | 1.326 |
| AgSb <sub>0.93</sub> Mn <sub>0.07</sub> Te <sub>2</sub>                        | 302 | 58.43   | 121745.00 | 1.150 | 0.109 |
| Ag <sub>0.97</sub> Cr <sub>0.95</sub> Sb <sub>0.05</sub> Se <sub>2</sub>       | 403 | 96.40   | 12240.00  | 0.520 | 0.088 |
| Sn <sub>0.91</sub> Mn <sub>0.08</sub> Bi <sub>0.01</sub> Te                    | 473 | 75.45   | 240000.00 | 3.968 | 0.163 |
| Ag <sub>0.01</sub> Sn <sub>0.99</sub> Se <sub>0.85</sub> S <sub>0.15</sub>     | 616 | 430.34  | 488.00    | 0.130 | 0.428 |

|                                                                                                          |      |         |           |        |       |
|----------------------------------------------------------------------------------------------------------|------|---------|-----------|--------|-------|
| Zn <sub>0.875</sub> Cd <sub>0.125</sub> Sc <sub>0.02</sub> O <sub>1.03</sub>                             | 873  | -129.00 | 27710.00  | 3.300  | 0.122 |
| Bi <sub>0.94</sub> Pb <sub>0.06</sub> CuSeO                                                              | 150  | 71.60   | 100000.00 | 1.936  | 0.040 |
| Cu <sub>11.9</sub> Gd <sub>0.1</sub> Sb <sub>4</sub> S <sub>13</sub>                                     | 625  | 115.80  | 85398.00  | 1.505  | 0.476 |
| Nd <sub>2.78</sub> Te <sub>4</sub>                                                                       | 1173 | -213.84 | 20823.00  | 0.883  | 1.265 |
| (CaZn <sub>0.4</sub> Ag <sub>0.2</sub> Sb) <sub>0.91</sub> (LiZnSb) <sub>0.09</sub>                      | 773  | 193.53  | 20379.00  | 0.670  | 0.881 |
| BaGd <sub>2</sub> NiO <sub>5</sub>                                                                       | 1074 | 484.56  | 32.10     | 1.436  | 0.006 |
| Sr <sub>14</sub> MgBi <sub>11</sub>                                                                      | 717  | 87.54   | 52518.00  | 1.336  | 0.216 |
| EuZn <sub>2</sub> Sb <sub>2</sub>                                                                        | 400  | 140.40  | 92390.00  | 2.000  | 0.364 |
| SnTe <sub>0.15</sub> AgSbSe <sub>2</sub>                                                                 | 800  | 146.10  | 76600.00  | 1.716  | 0.762 |
| (Zn <sub>0.95</sub> In <sub>0.05</sub> ) <sub>4</sub> Sb <sub>3</sub>                                    | 323  | 146.30  | 26580.00  | 0.862  | 0.213 |
| GeSe <sub>0.7</sub> Te <sub>0.3</sub>                                                                    | 530  | 26.15   | 64179.00  | 1.485  | 0.016 |
| Al <sub>0.03</sub> Ge <sub>0.97</sub> Te                                                                 | 573  | 88.39   | 287500.00 | 4.313  | 0.298 |
| Cu <sub>1.02</sub> Fe <sub>0.98</sub> S <sub>2</sub>                                                     | 70   | -798.50 | 1.48      | 40.800 | 0.000 |
| Cu <sub>1.5</sub> S                                                                                      | 300  | 10.40   | 571905.00 | 4.370  | 0.004 |
| (Cu <sub>0.004</sub> Pb <sub>0.996</sub> Te)(MnTe) <sub>0.03</sub>                                       | 423  | -204.56 | 57655.00  | 1.560  | 0.654 |
| Mg <sub>0.97</sub> Li <sub>0.03</sub> Ge <sub>0.9</sub> Si <sub>0.1</sub>                                | 300  | 173.49  | 44769.00  | 4.918  | 0.082 |
| Mg <sub>2</sub> Zn <sub>1.02</sub> Sb <sub>2</sub>                                                       | 373  | 269.08  | 894.00    | 0.678  | 0.036 |
| Li <sub>0.02</sub> Cu <sub>1.85</sub> Se                                                                 | 603  | 47.79   | 244231.00 | 3.216  | 0.105 |
| Ga <sub>0.06</sub> Co <sub>4</sub> Sb <sub>11.97</sub> Ga <sub>0.03</sub>                                | 300  | -272.6  | 23700.00  | 3.300  | 0.200 |
| Mg <sub>1.96</sub> Li <sub>0.04</sub> Zn <sub>0.98</sub> Sb <sub>2</sub>                                 | 473  | 76.72   | 103280.00 | 1.263  | 0.228 |
| Ag <sub>1.3</sub> Sb <sub>0.9</sub> Pb <sub>15.7</sub> Te <sub>22.0</sub>                                | 523  | -171.20 | 913.00    | 1.010  | 0.014 |
| Ag <sub>0.4</sub> Sb <sub>1.1</sub> Pb <sub>19.6</sub> Te <sub>18.8</sub>                                | 473  | -17.60  | 17208.00  | 1.456  | 0.002 |
| (Cu <sub>3</sub> SnS <sub>4</sub> ) <sub>0.875</sub> (Ga <sub>2</sub> Te <sub>3</sub> ) <sub>0.125</sub> | 674  | 146.46  | 48829.00  | 1.533  | 0.461 |
| Ag <sub>2.0</sub> Se <sub>0.8</sub> Te <sub>0.2</sub>                                                    | 315  | -126.50 | 93850.00  | 0.765  | 0.618 |
| In <sub>0.225</sub> Co <sub>4</sub> Sb <sub>11.925</sub>                                                 | 300  | -173    | 116000.00 | 2.300  | 0.400 |
| Yb <sub>7</sub> Ca <sub>6</sub> BaMgSb <sub>11</sub>                                                     | 900  | 196.90  | 11750.00  | 0.622  | 0.659 |
| Mg <sub>3.5</sub> Ho <sub>0.03</sub> Sb <sub>1.97</sub> Te <sub>0.03</sub>                               | 600  | -245.77 | 18974.00  | 0.819  | 0.840 |
| Gd <sub>0.04</sub> Co <sub>4</sub> Sb <sub>12</sub>                                                      | 650  | -265    | 44100.00  | 2.700  | 0.600 |
| Sn <sub>0.97</sub> Mn <sub>0.03</sub> Te                                                                 | 625  | 92.97   | 202367.00 | 4.224  | 0.259 |
| Cu <sub>1.925</sub> Ag <sub>0.075</sub> SnSe <sub>3</sub>                                                | 500  | 126.77  | 9152.00   | 0.825  | 0.089 |
| Sn <sub>0.98</sub> Ce <sub>0.02</sub> Te                                                                 | 323  | 24.86   | 462025.00 | 5.000  | 0.018 |
| (Nb <sub>0.6</sub> Ta <sub>0.4</sub> ) <sub>0.8</sub> Ti <sub>0.2</sub> FeSb                             | 1200 | 218.20  | 91010.00  | 1.430  | 1.600 |
| Ag <sub>2</sub> Se <sub>1.03</sub>                                                                       | 332  | -140.43 | 118530.00 | 1.066  | 0.728 |

|                                                                                                |     |         |           |        |       |
|------------------------------------------------------------------------------------------------|-----|---------|-----------|--------|-------|
| Li <sub>0.03</sub> Cu <sub>1.82</sub> Bi <sub>0.03</sub> Se                                    | 761 | 104.10  | 106897.00 | 1.705  | 0.517 |
| (Sn <sub>0.8</sub> Ge <sub>0.2</sub> ) <sub>0.88</sub> Mn <sub>0.12</sub> Te                   | 573 | 95.40   | 150750.00 | 1.950  | 0.403 |
| Sn <sub>0.99</sub> Mn <sub>0.01</sub> Te                                                       | 768 | 112.70  | 159763.00 | 3.618  | 0.431 |
| Sn <sub>0.87</sub> Mn <sub>0.1</sub> Bi <sub>0.03</sub> Te                                     | 323 | 60.00   | 265500.00 | 4.237  | 0.073 |
| Ga <sub>0.15</sub> Co <sub>4</sub> Sb <sub>11.925</sub> Ga <sub>0.075</sub>                    | 650 | -285    | 24800.00  | 2.200  | 0.500 |
| Cu <sub>0.98</sub> Pd <sub>0.02</sub> FeS <sub>2</sub>                                         | 30  | -47.30  | 5829.00   | 22.500 | 0.000 |
| Cr <sub>2</sub> Ge <sub>2</sub> Te <sub>6</sub>                                                | 515 | 455.67  | 609.38    | 0.752  | 0.087 |
| Ag <sub>1.2</sub> Sb <sub>0.8</sub> Pb <sub>14.9</sub> Te <sub>22.7</sub>                      | 373 | 404.80  | 2315.00   | 1.090  | 0.130 |
| Mg <sub>2</sub> Zn <sub>0.96</sub> Sb <sub>2</sub>                                             | 300 | 288.82  | 3013.00   | 0.682  | 0.111 |
| Gd <sub>2</sub> Se <sub>2.98</sub>                                                             | 850 | -205.80 | 16918.00  | 1.117  | 0.545 |
| Cu <sub>2</sub> Se                                                                             | 385 | 127.40  | 52850.00  | 0.384  | 0.861 |
| Ag <sub>3.4</sub> Mo <sub>9</sub> Se <sub>11</sub>                                             | 743 | 132.90  | 33250.00  | 1.124  | 0.379 |
| Ba <sub>8.01</sub> Ga <sub>15.89</sub> Zn <sub>0.006</sub> Sn <sub>30.1</sub>                  | 300 | 335.60  | 14596.00  | 0.990  | 0.498 |
| Mg <sub>3.07</sub> Sb <sub>1.5</sub> Bi <sub>0.46</sub> Se <sub>0.04</sub>                     | 600 | -303.87 | 10749.00  | 0.657  | 0.906 |
| Ba <sub>0.95</sub> K <sub>0.05</sub> Zn <sub>2</sub> As <sub>2</sub>                           | 623 | 70.00   | 90141.00  | 2.660  | 0.103 |
| Sn <sub>0.99</sub> Mn <sub>0.01</sub> Te                                                       | 621 | 69.14   | 279290.00 | 5.184  | 0.160 |
| Ti <sub>0.995</sub> Al <sub>0.005</sub> O <sub>2</sub>                                         | 296 | -439.53 | 1172.00   | 7.000  | 0.010 |
| Ca <sub>3.2</sub> Yb <sub>1.65</sub> Pr <sub>0.15</sub> Al <sub>2</sub> Sb <sub>6</sub>        | 423 | 48.30   | 3000.00   | 1.460  | 0.002 |
| Cu <sub>26</sub> V <sub>2</sub> Ge <sub>6</sub> S <sub>32</sub>                                | 594 | 65.70   | 232000.00 | 3.337  | 0.178 |
| In <sub>4</sub> Se <sub>2.67</sub> Cl <sub>0.03</sub>                                          | 323 | -103.30 | 105263.00 | 0.880  | 0.412 |
| Br <sub>0.16</sub> Co <sub>4</sub> Sb <sub>11.34</sub> Te <sub>0.52</sub>                      | 300 | -136    | 135000.00 | 3.400  | 0.200 |
| Mn <sub>2</sub> Cu <sub>3</sub> In <sub>3</sub> Te <sub>8</sub>                                | 720 | 370.00  | 1000.00   | 0.740  | 0.139 |
| Cu <sub>2</sub> ZnSn <sub>0.925</sub> Ag <sub>0.075</sub> Se <sub>4</sub>                      | 473 | 67.89   | 67686.00  | 2.895  | 0.051 |
| PbTe                                                                                           | 323 | -230.71 | 22500.00  | 2.165  | 0.183 |
| (SnTe) <sub>0.88</sub> (CuSbTe <sub>2</sub> ) <sub>0.12</sub>                                  | 427 | 58.24   | 226651.00 | 3.205  | 0.102 |
| Cu <sub>2.88</sub> Ag <sub>0.12</sub> SbSe <sub>4</sub>                                        | 398 | 378.00  | 9159.00   | 1.390  | 0.375 |
| Cr <sub>2</sub> Ge <sub>2</sub> Te <sub>6</sub>                                                | 614 | 401.55  | 1148.44   | 0.681  | 0.167 |
| Mg <sub>2.16</sub> (Si <sub>0.4</sub> Sn <sub>0.6</sub> ) <sub>0.985</sub> Bi <sub>0.015</sub> | 500 | -179.40 | 123333.00 | 2.271  | 0.877 |
| Sm <sub>0.2</sub> Bi <sub>1.8</sub> Te <sub>3</sub>                                            | 498 | -155.80 | 52300.00  | 0.810  | 0.781 |
| Cu <sub>7</sub> P(S <sub>0.25</sub> Se <sub>0.75</sub> ) <sub>6</sub>                          | 422 | 232.54  | 2452.00   | 0.286  | 0.195 |
| Bi <sub>0.9</sub> Ag <sub>0.1</sub> CuSeO                                                      | 473 | 235.00  | 1870.00   | 0.530  | 0.092 |
| CoSb <sub>3.0</sub>                                                                            | 473 | -105.00 | 3125.00   | 5.100  | 0.003 |
| GeTe                                                                                           | 375 | 36.33   | 575000.00 | 6.281  | 0.045 |

|                                                                              |     |         |           |        |       |
|------------------------------------------------------------------------------|-----|---------|-----------|--------|-------|
| (SnTe) <sub>0.9</sub> (CuSbTe <sub>2</sub> ) <sub>0.1</sub>                  | 824 | 155.00  | 98350.00  | 1.553  | 1.254 |
| (SnTe) <sub>0.9</sub> (CuSbTe <sub>2</sub> ) <sub>0.1</sub>                  | 321 | 39.01   | 329501.00 | 3.727  | 0.043 |
| Cu <sub>3</sub> Sb <sub>0.996</sub> In <sub>0.004</sub> Se <sub>4</sub>      | 623 | 267.00  | 10000.00  | 1.030  | 0.431 |
| LiCo <sub>0.98</sub> Ni <sub>0.02</sub> O <sub>2</sub>                       | 823 | 713.70  | 24.43     | 1.966  | 0.005 |
| Cu <sub>1.5</sub> S                                                          | 450 | 18.30   | 513462.00 | 5.120  | 0.015 |
| Ge <sub>0.85</sub> In <sub>0.05</sub> Pb <sub>0.1</sub> Te                   | 425 | 242.35  | 27446.00  | 0.933  | 0.734 |
| Yb <sub>13.44</sub> Ce <sub>0.4</sub> Mn <sub>1.09</sub> Sb <sub>11.07</sub> | 673 | 156.30  | 19810.00  | 0.715  | 0.456 |
| Mg <sub>3.5</sub> H <sub>0.02</sub> Sb <sub>1.97</sub> Te <sub>0.03</sub>    | 500 | -253.19 | 19279.00  | 0.894  | 0.691 |
| Sn <sub>0.97</sub> Pb <sub>0.02</sub> Zn <sub>0.01</sub> Se                  | 573 | 540.43  | 724.00    | 0.846  | 0.143 |
| Tl <sub>8.98</sub> Sb <sub>1.02</sub> Te <sub>6</sub>                        | 445 | 166.50  | 27730.00  | 0.500  | 0.684 |
| Al <sub>0.01</sub> Ge <sub>0.99</sub> Te                                     | 673 | 116.30  | 250000.00 | 3.695  | 0.616 |
| Ti <sub>0.96</sub> Al <sub>0.04</sub> O <sub>2</sub>                         | 296 | -282.20 | 2112.00   | 5.720  | 0.009 |
| Yb <sub>11</sub> Ca <sub>2</sub> BaMgSb <sub>11</sub>                        | 900 | 191.00  | 13650.00  | 0.669  | 0.670 |
| (Cu <sub>0.005</sub> Pb <sub>0.995</sub> Te)(MnTe) <sub>0.03</sub>           | 323 | -177.02 | 97810.00  | 1.930  | 0.513 |
| Al <sub>0.01</sub> Sb <sub>0.1</sub> Ge <sub>0.89</sub> Te                   | 473 | 231.99  | 37590.00  | 1.355  | 0.619 |
| Ba <sub>0.99</sub> K <sub>0.01</sub> Zn <sub>2</sub> As <sub>2</sub>         | 323 | 108.70  | 47761.00  | 2.397  | 0.076 |
| Sn <sub>0.965</sub> Pb <sub>0.01</sub> Cd <sub>0.025</sub> Se                | 473 | 360.00  | 3349.00   | 0.624  | 0.329 |
| Cu <sub>2</sub> Sn <sub>0.95</sub> Zn <sub>0.05</sub> S <sub>3</sub>         | 523 | 151.00  | 14000.00  | 0.964  | 0.173 |
| Cu <sub>2</sub> S <sub>0.5</sub> Se <sub>0.5</sub>                           | 772 | 287.27  | 6980.00   | 0.685  | 0.649 |
| Li <sub>0.03</sub> Cu <sub>1.8</sub> Bi <sub>0.05</sub> Se                   | 606 | 107.20  | 57471.00  | 1.035  | 0.397 |
| Li <sub>0.03</sub> Cu <sub>1.83</sub> Bi <sub>0.02</sub> Se                  | 401 | 49.00   | 96552.00  | 1.571  | 0.059 |
| BiSbSe <sub>2.82</sub> Cl <sub>0.18</sub>                                    | 700 | -232.00 | 8400.00   | 0.480  | 0.659 |
| ZrNiPb <sub>0.99</sub> Bi <sub>0.01</sub>                                    | 771 | -188.57 | 117401.00 | 6.463  | 0.498 |
| (SnTe) <sub>25</sub> Sb <sub>2</sub> Te <sub>3</sub>                         | 773 | 161.90  | 105000.00 | 2.170  | 0.780 |
| Mg <sub>3.07</sub> Sb <sub>1.5</sub> Bi <sub>0.46</sub> Se <sub>0.04</sub>   | 700 | -304.84 | 10809.00  | 0.626  | 1.122 |
| Tl <sub>8.95</sub> Bi <sub>1.05</sub> Te <sub>6.0</sub>                      | 382 | -208.00 | 320.00    | 0.344  | 0.015 |
| MgAgSb <sub>0.985</sub> In <sub>0.015</sub>                                  | 350 | 164.55  | 72072.00  | 1.230  | 0.556 |
| VFeSb                                                                        | 400 | -188.80 | 113554.00 | 6.072  | 0.267 |
| Cu <sub>3</sub> Sb <sub>0.925</sub> Ge <sub>0.075</sub> S <sub>4</sub>       | 573 | 247.78  | 13638.00  | 0.960  | 0.500 |
| ZnSc <sub>0.02</sub> O <sub>1.03</sub>                                       | 373 | -181.50 | 3200.00   | 37.100 | 0.001 |
| Bi <sub>2</sub> Si <sub>2</sub> Te <sub>6</sub>                              | 773 | 101.00  | 8889.00   | 0.741  | 0.095 |
| Mg <sub>2</sub> Sn <sub>0.99</sub> Sb <sub>0.01</sub>                        | 350 | -113.20 | 349107.00 | 6.000  | 0.261 |
| Pb <sub>0.9825</sub> Tl <sub>0.0075</sub> Na <sub>0.01</sub> Te              | 798 | 258.82  | 30881.00  | 0.882  | 1.872 |

|                                                                                             |      |         |           |       |       |
|---------------------------------------------------------------------------------------------|------|---------|-----------|-------|-------|
| AgSn <sub>5.0</sub> BiTe <sub>7.0</sub>                                                     | 300  | 112.00  | 100000.00 | 1.610 | 0.234 |
| Ti <sub>0.925</sub> Mn <sub>0.075</sub> NiSn <sub>0.925</sub> Sb <sub>0.075</sub>           | 598  | -106.16 | 235762.00 | 6.221 | 0.255 |
| Eu(Zn <sub>0.9</sub> Cd <sub>0.1</sub> ) <sub>2</sub> Sb <sub>2</sub>                       | 550  | 181.48  | 69000.00  | 1.518 | 0.823 |
| Ti <sub>0.925</sub> Mn <sub>0.075</sub> NiSn <sub>0.925</sub> Sb <sub>0.075</sub>           | 871  | -122.90 | 188100.00 | 5.893 | 0.420 |
| K <sub>0.09</sub> Co <sub>4</sub> Sb <sub>12</sub>                                          | 300  | -212    | 65000.00  | 6.600 | 0.100 |
| LaCo <sub>0.75</sub> Ni <sub>0.25</sub> O <sub>3</sub>                                      | 300  | 114.46  | 4340.00   | 0.330 | 0.049 |
| Ag <sub>0.03</sub> Cr <sub>1.97</sub> Se <sub>3</sub>                                       | 512  | 139.44  | 30319.00  | 1.502 | 0.201 |
| Ca <sub>3</sub> Co <sub>2</sub> O <sub>6</sub>                                              | 1073 | 160.00  | 13500.00  | 2.442 | 0.152 |
| (Sn <sub>0.8</sub> Ge <sub>0.2</sub> ) <sub>0.85</sub> Mn <sub>0.15</sub> Te                | 573  | 100.00  | 135100.00 | 1.638 | 0.473 |
| AgMo <sub>6</sub> Te <sub>8</sub>                                                           | 600  | 19.59   | 169800.00 | 4.170 | 0.009 |
| BiCu <sub>0.975</sub> SeO                                                                   | 523  | 203.70  | 1852.00   | 0.570 | 0.080 |
| BiSb(Se <sub>0.96</sub> Br <sub>0.04</sub> ) <sub>3</sub>                                   | 800  | -228.00 | 12500.00  | 0.450 | 1.155 |
| AgBi <sub>0.94</sub> Pb <sub>0.06</sub> Se <sub>2.12</sub>                                  | 350  | 317.70  | 6074.00   | 0.644 | 0.333 |
| Ca <sub>1.18</sub> Yb <sub>3.82</sub> Al <sub>1.84</sub> In <sub>0.16</sub> Sb <sub>6</sub> | 327  | 24.31   | 39212.00  | 3.125 | 0.002 |
| CoGeTe                                                                                      | 626  | -111.49 | 9043.00   | 5.826 | 0.012 |
| Cu <sub>2</sub> Se                                                                          | 750  | 177.70  | 38500.00  | 1.000 | 0.912 |
| BiCu <sub>0.90</sub> SeO                                                                    | 323  | 166.00  | 43.00     | 1.190 | 0.000 |
| Yb <sub>13.44</sub> Ce <sub>0.4</sub> Mn <sub>1.09</sub> Sb <sub>11.07</sub>                | 773  | 180.00  | 16420.00  | 0.677 | 0.607 |
| Cu <sub>26</sub> V <sub>2</sub> Ge <sub>5</sub> Sb <sub>32</sub>                            | 400  | 54.70   | 260976.00 | 3.120 | 0.100 |
| Ag <sub>2.0</sub> Se <sub>0.9</sub> Te <sub>0.1</sub>                                       | 315  | -136.60 | 94128.00  | 0.818 | 0.676 |
| Tl <sub>9.0</sub> BiTe <sub>6.0</sub>                                                       | 385  | 233.47  | 13364.00  | 3.970 | 0.071 |
| Ge <sub>0.9</sub> Mn <sub>0.05</sub> Sb <sub>0.05</sub> Te                                  | 598  | 175.00  | 93814.00  | 1.775 | 0.968 |
| Ca <sub>6</sub> Yb <sub>5</sub> Sb <sub>10</sub>                                            | 327  | 6.22    | 50612.00  | 1.063 | 0.001 |
| FeNb <sub>0.9</sub> Zr <sub>0.1</sub> Sb                                                    | 800  | 209.30  | 126400.00 | 7.525 | 0.589 |
| Sn <sub>0.965</sub> Pb <sub>0.01</sub> Cd <sub>0.025</sub> Se                               | 573  | 392.70  | 2460.00   | 0.497 | 0.437 |
| As <sub>2</sub> Te <sub>2.3</sub> Se <sub>0.7</sub>                                         | 323  | 339.80  | 86.60     | 0.517 | 0.006 |
| Zn <sub>0.875</sub> Cd <sub>0.125</sub> Sc <sub>0.02</sub> O <sub>1.03</sub>                | 373  | -83.00  | 41000.00  | 5.670 | 0.019 |
| BiCu <sub>0.90</sub> SeO                                                                    | 723  | 223.00  | 80.00     | 0.710 | 0.004 |
| Zn <sub>0.9</sub> Cd <sub>0.1</sub> Sc <sub>0.01</sub> O <sub>1.015</sub>                   | 300  | -73.60  | 62187.00  | 8.170 | 0.012 |
| Cu <sub>3</sub> Sb <sub>0.975</sub> Ge <sub>0.025</sub> S <sub>4</sub>                      | 300  | 287.00  | 5000.00   | 1.918 | 0.064 |
| Cu <sub>1.8</sub> Se                                                                        | 473  | 33.66   | 493243.00 | 4.988 | 0.053 |
| PbZn <sub>0.015</sub> Te                                                                    | 421  | -292.70 | 27830.00  | 1.522 | 0.665 |
| VFeSb                                                                                       | 500  | -201.50 | 86140.00  | 5.205 | 0.336 |

|                                                                                             |      |         |           |        |       |
|---------------------------------------------------------------------------------------------|------|---------|-----------|--------|-------|
| Ag <sub>1.1</sub> Sb <sub>0.8</sub> Pb <sub>15.5</sub> Te <sub>22.6</sub>                   | 473  | 340.00  | 3015.00   | 1.480  | 0.111 |
| Ge <sub>0.55</sub> Pb <sub>0.45</sub> Te <sub>0.3</sub> Se <sub>0.7</sub>                   | 470  | 338.75  | 3571.00   | 0.648  | 0.370 |
| Cu <sub>1.55</sub> S                                                                        | 600  | 31.55   | 378846.00 | 4.733  | 0.048 |
| Cu <sub>1.875</sub> Ag <sub>0.125</sub> SnSe <sub>3</sub>                                   | 800  | 370.71  | 2694.00   | 0.324  | 0.915 |
| In <sub>4</sub> Se <sub>2.67</sub> Cl <sub>0.03</sub>                                       | 598  | -192.86 | 31890.00  | 0.617  | 1.149 |
| Gd <sub>2.84</sub> Se <sub>4</sub>                                                          | 650  | -111.96 | 25696.00  | 1.265  | 0.166 |
| Ca <sub>0.99</sub> Yb <sub>4.01</sub> Al <sub>2</sub> Sb <sub>5.84</sub> Ge <sub>0.16</sub> | 421  | 242.92  | 1308.00   | 1.037  | 0.031 |
| Bi <sub>0.96</sub> Pb <sub>0.02</sub> Yb <sub>0.02</sub> CuSeO                              | 543  | 172.00  | 18300.00  | 0.660  | 0.445 |
| SnSe <sub>0.8</sub> S <sub>0.2</sub>                                                        | 373  | 234.49  | 1068.00   | 1.285  | 0.017 |
| Pb <sub>0.985</sub> Zn <sub>0.03</sub> Te                                                   | 724  | -266.85 | 25066.00  | 1.106  | 1.169 |
| YbCd <sub>1.1</sub> Zn <sub>0.9</sub> Sb <sub>2</sub>                                       | 450  | 102.40  | 108700.00 | 1.520  | 0.310 |
| Nd <sub>2.78</sub> Te <sub>4</sub>                                                          | 573  | -106.00 | 61350.00  | 1.234  | 0.310 |
| NbFe <sub>0.94</sub> Ir <sub>0.06</sub> Sb                                                  | 1101 | -205.90 | 34630.00  | 3.460  | 0.500 |
| YbCd <sub>1.2</sub> Zn <sub>0.8</sub> Sb <sub>2</sub>                                       | 450  | 110.20  | 99700.00  | 1.463  | 0.378 |
| Cu <sub>2.5</sub> Sn <sub>0.5</sub> Sb <sub>0.5</sub> Se <sub>3.5</sub>                     | 523  | 46.86   | 335460.00 | 4.480  | 0.086 |
| Ag <sub>2</sub> Se                                                                          | 399  | -127.46 | 284768.00 | 2.073  | 0.548 |
| Cu <sub>3</sub> ErTe <sub>3</sub>                                                           | 700  | 84.00   | 74222.00  | 0.620  | 0.591 |
| Cu <sub>2.88</sub> Ag <sub>0.12</sub> SbSe <sub>4</sub>                                     | 323  | 344.00  | 12645.00  | 1.870  | 0.258 |
| NbCo <sub>0.98</sub> Ni <sub>0.02</sub> Sn                                                  | 904  | -187.65 | 40480.00  | 6.893  | 0.187 |
| Bi <sub>2</sub> Te <sub>3</sub>                                                             | 423  | -151.80 | 90500.00  | 0.755  | 1.168 |
| Cu <sub>2</sub> Se                                                                          | 300  | 92.00   | 99586.00  | 0.880  | 0.287 |
| ZrNiPb <sub>0.9</sub> Sn <sub>0.8</sub> Bi <sub>0.02</sub>                                  | 303  | -123.50 | 190000.00 | 6.439  | 0.136 |
| MgAgSb <sub>0.98</sub> In <sub>0.02</sub>                                                   | 300  | 133.45  | 102583.00 | 1.426  | 0.459 |
| LiCo <sub>0.92</sub> Ni <sub>0.08</sub> O <sub>2</sub>                                      | 523  | 554.79  | 0.10      | 1.568  | 0.000 |
| Ag <sub>2</sub> Mo <sub>6</sub> Te <sub>8</sub>                                             | 700  | 21.47   | 189200.00 | 4.114  | 0.015 |
| K <sub>0.45</sub> Co <sub>4</sub> Sb <sub>12</sub>                                          | 800  | -181    | 136000.00 | 1.900  | 0.900 |
| FeNb <sub>0.96</sub> Ti <sub>0.04</sub> Sb                                                  | 300  | 153.00  | 160000.00 | 15.000 | 0.075 |
| Ba <sub>0.21</sub> In <sub>0.04</sub> Co <sub>4</sub> Sb <sub>11.93</sub>                   | 850  | -209    | 79200.00  | 1.600  | 1.000 |
| Mg <sub>1.98</sub> K <sub>0.02</sub> Zn <sub>0.98</sub> Sb <sub>2</sub>                     | 673  | 206.88  | 12063.00  | 0.762  | 0.456 |
| LiCo <sub>0.96</sub> Ni <sub>0.04</sub> O <sub>2</sub>                                      | 723  | 816.55  | 4.34      | 1.761  | 0.001 |
| Ca <sub>5</sub> Ga <sub>1.9</sub> Zn <sub>0.1</sub> Sb <sub>6</sub>                         | 425  | 115.00  | 30500.00  | 1.403  | 0.122 |
| Ca <sub>0.25</sub> BaGd <sub>1.75</sub> NiO <sub>5</sub>                                    | 1275 | 181.62  | 512.71    | 1.248  | 0.017 |
| (SnTe) <sub>25</sub> Sb <sub>2</sub> Te <sub>3</sub>                                        | 423  | 60.52   | 278250.00 | 4.000  | 0.108 |

|                                                                                          |     |         |           |        |       |
|------------------------------------------------------------------------------------------|-----|---------|-----------|--------|-------|
| AgBi <sub>0.96</sub> Pb <sub>0.04</sub> Se <sub>2.12</sub>                               | 350 | 376.70  | 2221.00   | 0.553  | 0.199 |
| CuGaTe <sub>2</sub>                                                                      | 775 | 250.70  | 21300.00  | 2.412  | 0.431 |
| Ca <sub>3.46</sub> Yb <sub>1.35</sub> Pr <sub>0.19</sub> Al <sub>2</sub> Sb <sub>6</sub> | 823 | -54.80  | 2000.00   | 1.371  | 0.004 |
| BaBiTe <sub>2.9</sub> Se <sub>0.1</sub>                                                  | 373 | -171.00 | 4499.00   | 0.409  | 0.120 |
| Cu <sub>2</sub> CdSnSe <sub>4</sub>                                                      | 300 | 235.70  | 2431.00   | 2.776  | 0.015 |
| BiSbSe <sub>2.82</sub> Cl <sub>0.18</sub>                                                | 300 | -125.00 | 18010.00  | 0.620  | 0.136 |
| Bi <sub>0.92</sub> Ag <sub>0.08</sub> CuSeO                                              | 473 | 221.49  | 1675.00   | 0.445  | 0.087 |
| Cu <sub>2</sub> Zn <sub>0.4</sub> Fe <sub>0.6</sub> SnSe <sub>4</sub>                    | 573 | 220.81  | 5458.00   | 1.059  | 0.144 |
| GeTe                                                                                     | 573 | 95.89   | 294600.00 | 4.131  | 0.376 |
| NbCo <sub>0.96</sub> Ni <sub>0.04</sub> Sn                                               | 904 | -182.25 | 56568.00  | 6.321  | 0.269 |
| Mg <sub>3</sub> Sb <sub>1.8</sub> Bi <sub>0.2</sub>                                      | 660 | 411.40  | 1556.50   | 0.610  | 0.290 |
| CuGaTe <sub>2</sub>                                                                      | 325 | 364.00  | 2300.00   | 6.965  | 0.014 |
| (Sn <sub>0.985</sub> In <sub>0.015</sub> Te) <sub>0.85</sub> (AgCl) <sub>0.15</sub>      | 523 | 84.20   | 249438.00 | 3.367  | 0.275 |
| K <sub>0.985</sub> Ba <sub>0.015</sub> GaSb <sub>4</sub>                                 | 324 | -145.92 | 24541.00  | 1.180  | 0.144 |
| (PbTe) <sub>0.1</sub> (Ag <sub>2</sub> Te) <sub>0.9</sub>                                | 600 | -181.55 | 19670.00  | 0.515  | 0.756 |
| Cu <sub>0.9</sub> Pd <sub>0.1</sub> FeS <sub>2</sub>                                     | 50  | -45.80  | 58294.00  | 13.750 | 0.000 |
| Yb <sub>13</sub> CaMnSb <sub>11</sub>                                                    | 973 | 176.70  | 20300.00  | 0.830  | 0.712 |
| Ba <sub>8</sub> Cu <sub>5.18</sub> Si <sub>9.98</sub> Ge <sub>30.85</sub>                | 663 | -132.50 | 49306.00  | 1.640  | 0.350 |
| LiCo <sub>0.96</sub> Ni <sub>0.04</sub> O <sub>2</sub>                                   | 923 | 652.40  | 47.00     | 1.466  | 0.013 |
| Tl <sub>0.22</sub> Co <sub>4</sub> Sb <sub>12</sub>                                      | 150 | -73.00  | 162903.00 | 3.655  | 0.036 |
| AgBiSe <sub>2.0</sub>                                                                    | 710 | -264.00 | 4650.00   | 0.466  | 0.494 |
| (SnTe) <sub>0.98</sub> (CuSbTe <sub>2</sub> ) <sub>0.02</sub>                            | 524 | 52.47   | 278383.00 | 5.198  | 0.077 |
| Cu <sub>7</sub> P(S <sub>0.65</sub> Se <sub>0.35</sub> ) <sub>6</sub>                    | 673 | 303.00  | 1675.00   | 0.212  | 0.489 |
| MgAgSb                                                                                   | 400 | 201.27  | 36364.00  | 0.969  | 0.608 |
| Sn <sub>0.97</sub> Pb <sub>0.01</sub> Cd <sub>0.025</sub> Se                             | 823 | 305.67  | 7016.00   | 0.497  | 1.086 |
| Ba <sub>0.03</sub> Co <sub>4</sub> Sb <sub>12</sub>                                      | 600 | -215.17 | 29787.00  | 3.714  | 0.223 |
| Cu <sub>1.99</sub> S <sub>0.5</sub> Se <sub>0.5</sub>                                    | 475 | 159.20  | 3564.00   | 0.552  | 0.078 |
| Pb <sub>0.995</sub> Zn <sub>0.02</sub> Te                                                | 520 | -312.70 | 22730.00  | 1.313  | 0.880 |
| Bi <sub>0.8</sub> Ba <sub>0.2</sub> CuSeO                                                | 319 | 178.40  | 22596.00  | 0.887  | 0.270 |
| Bi <sub>0.9</sub> Ag <sub>0.1</sub> CuSeO                                                | 423 | 200.00  | 2079.00   | 0.550  | 0.064 |
| Cu <sub>2</sub> Zn <sub>0.4</sub> Fe <sub>0.6</sub> SnSe <sub>4</sub>                    | 373 | 215.90  | 3226.00   | 1.921  | 0.029 |
| Zn <sub>0.85</sub> Cd <sub>0.15</sub> Sc <sub>0.02</sub> O <sub>1.03</sub>               | 573 | -79.00  | 19800.00  | 5.000  | 0.014 |
| Ge <sub>0.87</sub> Mn <sub>0.05</sub> Sb <sub>0.08</sub> Te                              | 398 | 124.03  | 95876.00  | 1.860  | 0.316 |

|                                                                                                |      |         |           |       |       |
|------------------------------------------------------------------------------------------------|------|---------|-----------|-------|-------|
| Cu <sub>11.8</sub> Gd <sub>0.2</sub> Sb <sub>4</sub> S <sub>13</sub>                           | 425  | 91.87   | 107701.00 | 1.431 | 0.270 |
| Sn <sub>0.98</sub> Pb <sub>0.01</sub> Zn <sub>0.01</sub> Se                                    | 300  | 435.21  | 5000.00   | 1.234 | 0.230 |
| (SnTe) <sub>12</sub> Sb <sub>2</sub> Te <sub>3</sub>                                           | 773  | 164.00  | 85900.00  | 1.950 | 0.916 |
| (CaZn <sub>0.4</sub> Ag <sub>0.2</sub> Sb) <sub>0.83</sub> (LiZnSb) <sub>0.17</sub>            | 371  | 119.33  | 42345.00  | 0.895 | 0.250 |
| Cu <sub>2</sub> Se <sub>0.96</sub> I <sub>0.04</sub>                                           | 350  | 106.40  | 47628.00  | 0.500 | 0.377 |
| La <sub>0.1</sub> Co <sub>4</sub> Sb <sub>12</sub>                                             | 473  | 84.00   | 27613.00  | 3.716 | 0.025 |
| Cu <sub>0.99</sub> Pd <sub>0.01</sub> FeS <sub>2</sub>                                         | 300  | -396.00 | 5233.00   | 9.200 | 0.027 |
| (SnTe) <sub>0.84</sub> (CuSbTe <sub>2</sub> ) <sub>0.16</sub>                                  | 818  | 157.14  | 91351.00  | 1.714 | 1.076 |
| Rb <sub>2</sub> Bi <sub>8</sub> Se <sub>12.94</sub> I <sub>5</sub>                             | 526  | -220.00 | 5950.00   | 0.594 | 0.255 |
| BaErCo <sub>4</sub> O <sub>7</sub>                                                             | 368  | 132.00  | 94.00     | 0.624 | 0.001 |
| Nd <sub>2.86</sub> Te <sub>4</sub>                                                             | 1073 | -134.20 | 61300.00  | 1.588 | 0.746 |
| Yb <sub>0.066</sub> Co <sub>4</sub> Sb <sub>12</sub>                                           | 300  | -186    | 48000.00  | 4.800 | 0.100 |
| Ba <sub>0.96</sub> K <sub>0.04</sub> Zn <sub>2</sub> As <sub>2</sub>                           | 623  | 90.74   | 54237.00  | 1.801 | 0.154 |
| Mg <sub>2.16</sub> (Si <sub>0.4</sub> Sn <sub>0.6</sub> ) <sub>0.995</sub> Bi <sub>0.005</sub> | 620  | -260.80 | 44550.00  | 1.743 | 1.078 |
| Eu <sub>0.03</sub> Co <sub>4</sub> Sb <sub>12</sub>                                            | 850  | -146    | 32300.00  | 3.500 | 0.100 |
| Sn <sub>0.975</sub> Pb <sub>0.01</sub> Cd <sub>0.015</sub> Se                                  | 473  | 370.33  | 2512.00   | 0.763 | 0.214 |
| GeSe <sub>0.65</sub> Te <sub>0.35</sub>                                                        | 630  | 34.00   | 80597.00  | 1.757 | 0.033 |
| Cu <sub>2.2</sub> Sn <sub>0.8</sub> Sb <sub>0.2</sub> Se <sub>3.2</sub>                        | 473  | 68.57   | 160372.00 | 2.973 | 0.120 |
| Ag <sub>8</sub> GeTe <sub>6</sub>                                                              | 413  | 467.00  | 275.00    | 0.267 | 0.091 |
| GeSe <sub>0.95</sub> Te <sub>0.05</sub>                                                        | 535  | 599.48  | 63.32     | 1.063 | 0.011 |
| Li <sub>0.01</sub> Cu <sub>1.85</sub> Se                                                       | 706  | 57.11   | 235577.00 | 3.379 | 0.161 |
| In <sub>0.01</sub> Pb <sub>0.99</sub> Te <sub>0.998</sub> I <sub>0.002</sub>                   | 585  | -256.00 | 18125.00  | 1.384 | 0.497 |
| BaZn <sub>2</sub> As <sub>2</sub>                                                              | 323  | 203.00  | 6942.00   | 1.879 | 0.049 |
| Sr <sub>0.21</sub> Yb <sub>0.03</sub> Co <sub>4</sub> Sb <sub>12.12</sub>                      | 500  | -146.00 | 243182.00 | 3.770 | 0.687 |
| TiZr <sub>0.015</sub> NiSn                                                                     | 522  | -203.05 | 57077.00  | 2.366 | 0.555 |
| YbCd <sub>1.7</sub> Zn <sub>0.3</sub> Sb <sub>2</sub>                                          | 550  | 180.40  | 50995.00  | 1.375 | 0.693 |
| Ca <sub>5</sub> In <sub>1.95</sub> Zn <sub>0.05</sub> Sb <sub>6</sub>                          | 922  | 215.73  | 12860.00  | 0.815 | 0.680 |
| (SnTe) <sub>40</sub> Sb <sub>2</sub> Te <sub>3</sub>                                           | 773  | 143.53  | 105875.00 | 2.594 | 0.650 |
| In <sub>4</sub> Se <sub>2.32</sub> Cl <sub>0.03</sub>                                          | 373  | -228.00 | 27400.00  | 1.087 | 0.493 |
| Pb <sub>0.98</sub> Tl <sub>0.01</sub> Na <sub>0.01</sub> Te                                    | 301  | 125.20  | 91454.00  | 2.294 | 0.188 |
| K <sub>0.22</sub> Co <sub>4</sub> Sb <sub>12</sub>                                             | 800  | -180    | 65000.00  | 3.300 | 0.400 |
| (V <sub>0.6</sub> Nb <sub>0.4</sub> ) <sub>0.8</sub> Ti <sub>0.2</sub> FeSb                    | 900  | 214.10  | 62670.00  | 2.370 | 0.800 |
| FeNb <sub>0.86</sub> Hf <sub>0.14</sub> Sb                                                     | 500  | 124.50  | 366667.00 | 5.763 | 0.493 |



|                                                                            |      |         |           |       |       |
|----------------------------------------------------------------------------|------|---------|-----------|-------|-------|
| TlCr <sub>5</sub> Se <sub>8</sub>                                          | 623  | 284.00  | 5010.00   | 0.690 | 0.380 |
| Sn <sub>1.03</sub> Se <sub>0.08</sub> Te <sub>0.92</sub>                   | 423  | 26.17   | 387719.00 | 5.428 | 0.021 |
| Cu <sub>3</sub> SbS <sub>4</sub>                                           | 373  | 641.76  | 200.80    | 1.414 | 0.022 |
| AgSn <sub>15.0</sub> BiTe <sub>17.0</sub>                                  | 300  | 65.86   | 204810.00 | 2.600 | 0.103 |
| Cu <sub>2</sub> ZnSn <sub>0.98</sub> Ag <sub>0.02</sub> Se <sub>4</sub>    | 473  | 95.77   | 50654.00  | 3.643 | 0.060 |
| Li <sub>0.03</sub> Cu <sub>1.82</sub> Bi <sub>0.03</sub> Se                | 401  | 43.59   | 95402.00  | 1.348 | 0.054 |
| Zr <sub>0.5</sub> Hf <sub>0.5</sub> CoSb <sub>0.8</sub> Sn <sub>0.2</sub>  | 974  | 216.70  | 56580.00  | 2.190 | 0.800 |
| Cu <sub>2</sub> Se                                                         | 572  | 76.20   | 189189.00 | 2.509 | 0.250 |
| Cu <sub>2</sub> Se <sub>0.96</sub> I <sub>0.04</sub>                       | 365  | 120.00  | 34927.00  | 0.350 | 0.525 |
| Ag <sub>0.97</sub> Cr <sub>0.97</sub> Sb <sub>0.03</sub> Se <sub>2</sub>   | 403  | 86.02   | 21461.00  | 0.474 | 0.135 |
| (SnTe) <sub>12</sub> Sb <sub>2</sub> Te <sub>3</sub>                       | 723  | 162.50  | 87700.00  | 1.880 | 0.878 |
| NbCo <sub>0.94</sub> Ni <sub>0.06</sub> Sn                                 | 487  | -68.53  | 164524.00 | 8.536 | 0.044 |
| Pd <sub>0.20</sub> Co <sub>3.80</sub> Sb <sub>12.01</sub>                  | 850  | -203    | 78100.00  | 3.300 | 0.600 |
| Ca <sub>5</sub> Ga <sub>1.9</sub> Zn <sub>0.1</sub> Sb <sub>6</sub>        | 525  | 133.00  | 28513.00  | 1.258 | 0.213 |
| Ce <sub>0.15</sub> Co <sub>4</sub> Sb <sub>12</sub>                        | 850  | -194    | 115000.00 | 1.100 | 1.200 |
| Sn <sub>0.91</sub> Mn <sub>0.09</sub> Te <sub>0.97</sub> I <sub>0.03</sub> | 524  | 106.19  | 137949.00 | 2.750 | 0.296 |
| Cu <sub>3.0</sub> SbSe <sub>4</sub>                                        | 523  | 379.00  | 4518.00   | 1.240 | 0.274 |
| Cu <sub>2</sub> Sn <sub>0.95</sub> Fe <sub>0.05</sub> Se <sub>3</sub>      | 423  | 71.43   | 100000.00 | 2.703 | 0.080 |
| Cu <sub>5.133</sub> Sn <sub>1.866</sub> S <sub>7</sub>                     | 300  | 21.31   | 400000.00 | 6.563 | 0.008 |
| Pb <sub>0.975</sub> Zn <sub>0.04</sub> Te                                  | 520  | -232.61 | 38400.00  | 1.511 | 0.720 |
| Ca <sub>14</sub> MgBi <sub>11</sub>                                        | 621  | 69.85   | 27652.00  | 1.046 | 0.080 |
| ZnSc <sub>0.02</sub> O <sub>1.03</sub>                                     | 1173 | -290.00 | 4700.00   | 5.700 | 0.081 |
| BiCuSeO                                                                    | 319  | 427.56  | 777.00    | 0.784 | 0.058 |
| Ag <sub>2.0</sub> Se <sub>0.9</sub> Te <sub>0.1</sub>                      | 375  | -133.00 | 108624.00 | 0.920 | 0.783 |
| Ge <sub>0.9</sub> Mn <sub>0.05</sub> Sb <sub>0.05</sub> Te                 | 398  | 92.30   | 136082.00 | 2.610 | 0.177 |
| BiCu <sub>0.925</sub> SeO                                                  | 723  | 292.00  | 1907.00   | 0.930 | 0.126 |
| Cu <sub>2</sub> Se <sub>0.92</sub> S <sub>0.08</sub>                       | 372  | 125.66  | 59220.00  | 0.396 | 0.878 |
| YbCd <sub>1.8</sub> Zn <sub>0.2</sub> Sb <sub>5</sub>                      | 650  | 181.84  | 43067.00  | 1.281 | 0.723 |
| Ag <sub>2</sub> Se <sub>1.02</sub>                                         | 362  | -135.53 | 144590.00 | 1.147 | 0.838 |
| Ag <sub>0.97</sub> Cr <sub>0.99</sub> Sb <sub>0.01</sub> Se <sub>2</sub>   | 603  | 132.20  | 13545.00  | 0.472 | 0.302 |
| Sn <sub>0.97</sub> Pb <sub>0.01</sub> Cd <sub>0.025</sub> Se               | 473  | 365.33  | 2873.00   | 0.703 | 0.258 |
| Mg <sub>1.96</sub> Li <sub>0.04</sub> Zn <sub>0.98</sub> Sb <sub>2</sub>   | 373  | 62.70   | 127831.00 | 1.338 | 0.138 |
| Ag <sub>0.98</sub> Nb <sub>0.02</sub> BiSe <sub>2.0</sub>                  | 425  | -150.00 | 14713.00  | 0.680 | 0.207 |

|                                                                                              |     |         |           |       |       |
|----------------------------------------------------------------------------------------------|-----|---------|-----------|-------|-------|
| Mg <sub>2</sub> Cu <sub>3</sub> In <sub>3</sub> Te <sub>8</sub>                              | 523 | 310.40  | 3345.00   | 1.850 | 0.091 |
| Ge <sub>0.87</sub> In <sub>0.05</sub> Pb <sub>0.08</sub> Te                                  | 375 | 183.19  | 48117.00  | 1.113 | 0.544 |
| Cu <sub>2.8</sub> Sn <sub>0.2</sub> Sb <sub>0.8</sub> Se <sub>3.8</sub>                      | 473 | 54.29   | 300000.00 | 4.553 | 0.092 |
| Cu <sub>26</sub> Ti <sub>2</sub> Sb <sub>4</sub> Ge <sub>2</sub> S <sub>32</sub>             | 596 | 180.93  | 36306.00  | 0.943 | 0.751 |
| Ag <sub>0.03</sub> Cu <sub>1.945</sub> S <sub>0.5</sub> Se <sub>0.5</sub>                    | 772 | 228.00  | 22426.00  | 0.761 | 0.900 |
| Cu <sub>0.995</sub> Pd <sub>0.005</sub> FeS <sub>2</sub>                                     | 300 | -404.50 | 4217.00   | 7.840 | 0.026 |
| Ta <sub>0.98</sub> Ti <sub>0.02</sub> FeSb                                                   | 970 | 319.00  | 25300.00  | 4.380 | 0.566 |
| K <sub>0.22</sub> Co <sub>4</sub> Sb <sub>12</sub>                                           | 300 | -120    | 164000.00 | 5.700 | 0.100 |
| Cu <sub>10.5</sub> NiZn <sub>0.5</sub> Sb <sub>4</sub> S <sub>13</sub>                       | 420 | 176.00  | 17950.00  | 0.524 | 0.442 |
| Cu <sub>3</sub> P <sub>0.8</sub> Ge <sub>0.2</sub> S <sub>4</sub>                            | 400 | 96.00   | 30740.00  | 0.982 | 0.115 |
| Cu <sub>2.9</sub> Ag <sub>0.1</sub> ErTe <sub>3</sub>                                        | 500 | 57.00   | 203556.00 | 2.060 | 0.161 |
| Ca <sub>14</sub> MgSb <sub>11</sub>                                                          | 400 | 121.43  | 2620.00   | 0.600 | 0.026 |
| In <sub>4</sub> Se <sub>2.32</sub> Cl <sub>0.03</sub>                                        | 648 | -301.70 | 11516.00  | 0.733 | 0.927 |
| ZrNiPb <sub>0.94</sub> Sn <sub>0.4</sub> Bi <sub>0.02</sub>                                  | 771 | -148.90 | 206610.00 | 5.333 | 0.662 |
| Ag <sub>8</sub> Sn <sub>0.5</sub> Ga <sub>0.5</sub> Se <sub>6</sub>                          | 477 | -435.28 | 298.00    | 0.248 | 0.109 |
| Sr <sub>0.11</sub> Ba <sub>0.18</sub> Co <sub>4</sub> Sb <sub>12</sub> O <sub>9</sub>        | 600 | -144.00 | 256018.00 | 3.930 | 0.811 |
| (Sn <sub>0.8</sub> Ge <sub>0.2</sub> ) <sub>0.85</sub> Mn <sub>0.15</sub> Te                 | 473 | 84.80   | 156300.00 | 1.732 | 0.307 |
| Ag <sub>0.4</sub> Sb <sub>1.1</sub> Pb <sub>19.6</sub> Te <sub>18.8</sub>                    | 373 | 20.80   | 18406.00  | 1.663 | 0.002 |
| Ca <sub>14</sub> MgBi <sub>11</sub>                                                          | 521 | 66.94   | 24828.00  | 0.954 | 0.061 |
| Mg <sub>2.16</sub> (Si <sub>0.4</sub> Sn <sub>0.6</sub> ) <sub>0.98</sub> Bi <sub>0.02</sub> | 800 | -212.94 | 78824.00  | 2.308 | 1.239 |
| Mg <sub>3.07</sub> Sb <sub>1.5</sub> Bi <sub>0.44</sub> Se <sub>0.06</sub>                   | 300 | -296.45 | 6769.00   | 0.825 | 0.216 |
| Cu <sub>3</sub> Sb <sub>0.997</sub> In <sub>0.003</sub> Se <sub>4</sub>                      | 473 | 301.00  | 6700.00   | 1.410 | 0.210 |
| Cu <sub>2</sub> Sn <sub>0.8</sub> Zn <sub>0.2</sub> S <sub>3</sub>                           | 523 | 78.00   | 98400.00  | 1.860 | 0.168 |
| AgBiSe <sub>2</sub>                                                                          | 600 | 55.80   | 237.00    | 0.410 | 0.001 |
| Cu <sub>3.0</sub> SbSe <sub>4</sub>                                                          | 398 | 465.00  | 2487.00   | 1.760 | 0.122 |
| Nb <sub>0.95</sub> Ta <sub>0.05</sub> CoSn <sub>0.9</sub> Sb <sub>0.1</sub>                  | 338 | -89.30  | 140000.00 | 5.562 | 0.068 |
| Ca <sub>1.11</sub> Yb <sub>3.89</sub> Al <sub>2</sub> Sb <sub>5.77</sub> Ge <sub>0.23</sub>  | 520 | 54.30   | 16500.00  | 2.037 | 0.012 |
| Cu <sub>2</sub> Sn <sub>0.8</sub> Zn <sub>0.2</sub> S <sub>3</sub>                           | 723 | 117.47  | 61095.00  | 1.280 | 0.476 |
| Ag <sub>3.7</sub> Mo <sub>9</sub> Se <sub>11</sub>                                           | 447 | 93.60   | 47100.00  | 1.162 | 0.159 |
| Ag <sub>0.01</sub> Sn <sub>0.99</sub> Se <sub>0.85</sub> S <sub>0.15</sub>                   | 418 | 352.56  | 841.00    | 0.192 | 0.228 |
| As <sub>2</sub> Te <sub>2.3</sub> Se <sub>0.7</sub>                                          | 523 | 206.12  | 585.95    | 0.479 | 0.027 |
| Mo <sub>3</sub> Sb <sub>7</sub> I <sub>1.25</sub>                                            | 523 | 35.83   | 483500.00 | 5.602 | 0.058 |
| Ag <sub>0.01</sub> Cr <sub>1.99</sub> Se <sub>3</sub>                                        | 619 | 161.14  | 24464.00  | 1.638 | 0.240 |

|                                                                                                                     |      |         |           |        |       |
|---------------------------------------------------------------------------------------------------------------------|------|---------|-----------|--------|-------|
| Cu <sub>2.94</sub> Ag <sub>0.06</sub> SbSe <sub>4</sub>                                                             | 298  | 397.00  | 6784.00   | 2.230  | 0.143 |
| (SnTe) <sub>25</sub> Sb <sub>2</sub> Te <sub>3</sub>                                                                | 323  | 44.48   | 352625.00 | 4.280  | 0.053 |
| Sr <sub>0.21</sub> Co <sub>4</sub> Sb <sub>12.25</sub>                                                              | 650  | -184.00 | 137273.00 | 3.650  | 0.828 |
| Yb <sub>13.44</sub> Ce <sub>0.4</sub> Mn <sub>1.09</sub> Sb <sub>11.07</sub>                                        | 1073 | 224.28  | 11340.00  | 0.656  | 0.933 |
| BaCu <sub>4.0</sub> S <sub>3.0</sub>                                                                                | 400  | 77.00   | 13920.00  | 0.750  | 0.044 |
| As <sub>2</sub> Te <sub>2</sub> Se                                                                                  | 523  | 171.29  | 153.99    | 0.414  | 0.006 |
| Cu <sub>2.1</sub> Cd <sub>0.9</sub> SnSe <sub>4</sub>                                                               | 450  | 138.60  | 23908.00  | 1.224  | 0.169 |
| (Ag <sub>0.15</sub> Sb <sub>0.15</sub> Sn <sub>0.7</sub> )(S <sub>0.15</sub> Se <sub>0.15</sub> Te <sub>0.7</sub> ) | 823  | 140.80  | 61700.00  | 1.270  | 0.792 |
| Ba <sub>0.05</sub> Yb <sub>0.09</sub> Co <sub>4</sub> Sb <sub>12</sub>                                              | 800  | -235.50 | 78191.00  | 2.590  | 1.280 |
| Eu <sub>2</sub> Zn <sub>0.96</sub> Sb <sub>2</sub>                                                                  | 723  | 200.00  | 14898.00  | 0.470  | 0.917 |
| (PbTe)(MnTe) <sub>0.03</sub>                                                                                        | 823  | -237.19 | 20966.00  | 1.171  | 0.829 |
| Pb <sub>0.96</sub> Tl <sub>0.02</sub> Na <sub>0.02</sub> Te                                                         | 497  | 189.87  | 58640.00  | 1.461  | 0.719 |
| Tl <sub>9.0</sub> Bi <sub>0.96</sub> Te <sub>6.0</sub>                                                              | 500  | 210.40  | 19700.00  | 0.497  | 0.878 |
| Cu <sub>10.5</sub> Ni <sub>0.5</sub> ZnSb <sub>4</sub> S <sub>13</sub>                                              | 517  | 205.40  | 10153.00  | 0.470  | 0.473 |
| BaGd <sub>2</sub> NiO <sub>5</sub>                                                                                  | 862  | 433.82  | 25.40     | 1.564  | 0.003 |
| Ba <sub>8.01</sub> Ga <sub>15.88</sub> Zn <sub>0.009</sub> Sn <sub>30.11</sub>                                      | 460  | 437.68  | 6118.00   | 0.820  | 0.658 |
| Yb <sub>13.44</sub> Ce <sub>0.4</sub> Mn <sub>1.09</sub> Sb <sub>11.07</sub>                                        | 373  | 72.10   | 34590.00  | 0.763  | 0.088 |
| Cu <sub>1.55</sub> S                                                                                                | 500  | 22.30   | 451442.00 | 4.815  | 0.023 |
| GeSe <sub>0.95</sub> Te <sub>0.05</sub>                                                                             | 326  | 634.00  | 12.40     | 1.913  | 0.001 |
| Ag <sub>1.2</sub> Sb <sub>0.8</sub> Pb <sub>14.9</sub> Te <sub>22.7</sub>                                           | 673  | 305.00  | 4350.00   | 0.950  | 0.280 |
| Cu <sub>3</sub> P <sub>0.7</sub> Ge <sub>0.3</sub> S <sub>4</sub>                                                   | 350  | 68.30   | 57975.00  | 1.307  | 0.072 |
| Ga <sub>0.10</sub> Co <sub>4</sub> Sb <sub>11.95</sub> Ga <sub>0.05</sub>                                           | 650  | -281    | 34900.00  | 2.200  | 0.700 |
| Nd <sub>2.9</sub> Te <sub>4</sub>                                                                                   | 373  | -35.70  | 180000.00 | 2.449  | 0.035 |
| Ag <sub>3.9</sub> Mo <sub>9</sub> Se <sub>11</sub>                                                                  | 547  | 146.60  | 21556.00  | 0.760  | 0.333 |
| ZrNiSn                                                                                                              | 873  | -154.90 | 86806.00  | 3.707  | 0.490 |
| CuFeS <sub>2</sub>                                                                                                  | 30   | -306.87 | 26.40     | 29.770 | 0.000 |
| Ag <sub>8</sub> Sn <sub>0.6</sub> Ga <sub>0.4</sub> Se <sub>6</sub>                                                 | 523  | -417.76 | 792.00    | 0.262  | 0.275 |
| Sn <sub>0.975</sub> Pb <sub>0.01</sub> Cd <sub>0.015</sub> Se                                                       | 373  | 344.37  | 2416.00   | 0.964  | 0.111 |
| AgCuTe <sub>0.5</sub> Se <sub>0.5</sub>                                                                             | 522  | 161.05  | 1845.00   | 0.296  | 0.084 |
| CuFe <sub>0.92</sub> In <sub>0.08</sub> S <sub>2</sub>                                                              | 600  | -379.20 | 2507.00   | 1.604  | 0.134 |
| Mg <sub>3.5</sub> H <sub>0.03</sub> Sb <sub>2</sub>                                                                 | 400  | -220.07 | 15724.00  | 1.042  | 0.292 |
| SnAgSbSe <sub>2</sub>                                                                                               | 700  | 86.70   | 190140.00 | 4.180  | 0.239 |

|                                                                                              |      |         |           |        |       |
|----------------------------------------------------------------------------------------------|------|---------|-----------|--------|-------|
| Cu <sub>2</sub> Se                                                                           | 359  | 104.40  | 82534.00  | 0.730  | 0.442 |
| NbCoSn                                                                                       | 678  | -219.20 | 43077.00  | 8.780  | 0.160 |
| Rb <sub>2</sub> Bi <sub>8</sub> Se <sub>13</sub>                                             | 330  | -268.00 | 1591.00   | 0.510  | 0.074 |
| SnTe <sub>0.25</sub> AgSbSe <sub>2</sub>                                                     | 700  | 142.20  | 71800.00  | 1.620  | 0.627 |
| In <sub>0.01</sub> Pb <sub>0.99</sub> Te <sub>0.998</sub> l <sub>0.002</sub>                 | 533  | -259.00 | 19100.00  | 1.440  | 0.471 |
| Bi <sub>0.94</sub> Pb <sub>0.06</sub> CuSeO                                                  | 250  | 110.80  | 58250.00  | 1.720  | 0.104 |
| Cu <sub>2</sub> Se <sub>0.96</sub> S <sub>0.04</sub>                                         | 333  | 97.04   | 112838.00 | 0.816  | 0.434 |
| FeNb <sub>0.9</sub> Zr <sub>0.1</sub> Sb                                                     | 300  | 107.52  | 397674.00 | 12.627 | 0.109 |
| Tl <sub>9.0</sub> Bi <sub>0.99</sub> Te <sub>6.0</sub>                                       | 503  | 264.00  | 11182.00  | 0.394  | 0.995 |
| Eu <sub>0.19</sub> Co <sub>4</sub> Sb <sub>12</sub>                                          | 850  | -191    | 89300.00  | 1.900  | 0.800 |
| Ti <sub>0.82</sub> PtSb                                                                      | 1072 | -164.00 | 72850.00  | 1.550  | 0.740 |
| Ba <sub>8.03</sub> Cu <sub>5</sub> Ge <sub>40.97</sub>                                       | 514  | -136.40 | 38800.00  | 1.249  | 0.297 |
| Mg <sub>2.16</sub> (Si <sub>0.4</sub> Sn <sub>0.6</sub> ) <sub>0.99</sub> Bi <sub>0.01</sub> | 700  | -235.60 | 65800.00  | 2.038  | 1.254 |
| BiSb(Se <sub>0.98</sub> Br <sub>0.02</sub> ) <sub>3</sub>                                    | 400  | -147.00 | 19362.00  | 0.610  | 0.274 |
| Ag <sub>0.03</sub> Cu <sub>1.945</sub> S <sub>0.5</sub> Se <sub>0.5</sub>                    | 375  | 155.16  | 4706.00   | 0.600  | 0.071 |
| Zn <sub>0.95</sub> Cd <sub>0.05</sub> Sc <sub>0.02</sub> O <sub>1.03</sub>                   | 973  | -147.00 | 12900.00  | 4.080  | 0.066 |
| Ca <sub>3</sub> Co <sub>3.9</sub> Ti <sub>0.1</sub> O <sub>9</sub>                           | 700  | 178.00  | 6682.00   | 2.258  | 0.066 |
| ZrNiPb <sub>0.985</sub> Bi <sub>0.015</sub>                                                  | 303  | -90.61  | 347550.00 | 10.803 | 0.080 |
| (SnTe) <sub>0.88</sub> (CuSbTe <sub>2</sub> ) <sub>0.12</sub>                                | 622  | 117.31  | 123839.00 | 2.236  | 0.474 |
| (Cu <sub>0.002</sub> Pb <sub>0.998</sub> Te)(MnTe) <sub>0.03</sub>                           | 773  | -206.14 | 43586.00  | 1.240  | 1.155 |
| Cu <sub>2.2</sub> Se                                                                         | 473  | 113.37  | 74324.00  | 1.161  | 0.389 |
| (Bi <sub>0.23</sub> Sb <sub>0.77</sub> ) <sub>2</sub> Te <sub>3</sub>                        | 400  | 241.93  | 37164.00  | 0.935  | 0.931 |
| Ag <sub>0.97</sub> Cr <sub>0.97</sub> Bi <sub>0.03</sub> Se <sub>2</sub>                     | 753  | 180.98  | 10468.00  | 0.396  | 0.652 |
| (Sn <sub>0.8</sub> Ge <sub>0.2</sub> ) <sub>0.91</sub> Mn <sub>0.09</sub> Te                 | 573  | 94.00   | 155977.00 | 2.110  | 0.374 |
| Mg <sub>3.07</sub> Sb <sub>1.5</sub> Bi <sub>0.47</sub> Se <sub>0.03</sub>                   | 300  | -280.98 | 7561.00   | 0.776  | 0.231 |
| SnS <sub>0.91</sub> Se <sub>0.09</sub>                                                       | 573  | 293.30  | 31650.00  | 1.217  | 1.285 |
| Ba <sub>1.6</sub> Bi <sub>0.4</sub> CoRuO <sub>6</sub>                                       | 618  | 34.00   | 165635.00 | 1.200  | 0.099 |
| Sn <sub>0.97</sub> Ce <sub>0.03</sub> Te                                                     | 723  | 185.00  | 50000.00  | 2.000  | 0.619 |
| Ag <sub>0.8</sub> Sb <sub>0.8</sub> Pb <sub>18.3</sub> Te <sub>20.0</sub>                    | 523  | -294.00 | 8800.00   | 0.760  | 0.523 |
| Ca <sub>5</sub> In <sub>1.98</sub> Zn <sub>0.02</sub> Sb <sub>6</sub>                        | 822  | 270.00  | 4702.00   | 0.655  | 0.430 |
| Cu <sub>2.1</sub> Se                                                                         | 374  | 50.00   | 246000.00 | 1.613  | 0.143 |
| Ge <sub>0.55</sub> Pb <sub>0.45</sub> Te <sub>0.5</sub> Se <sub>0.5</sub>                    | 300  | 220.50  | 10377.00  | 0.668  | 0.250 |
| Ti <sub>0.97</sub> Mn <sub>0.03</sub> NiSn <sub>0.97</sub> Sb <sub>0.03</sub>                | 598  | -140.76 | 139735.00 | 5.396  | 0.307 |

|                                                                                                          |      |         |           |        |       |
|----------------------------------------------------------------------------------------------------------|------|---------|-----------|--------|-------|
| Li <sub>0.03</sub> Cu <sub>1.81</sub> Bi <sub>0.04</sub> Se                                              | 711  | 132.82  | 58621.00  | 1.384  | 0.531 |
| Mg <sub>2.9875</sub> Na <sub>0.0125</sub> Sb <sub>2</sub>                                                | 673  | 171.00  | 24000.00  | 1.000  | 0.472 |
| Rb <sub>2</sub> Bi <sub>8</sub> Se <sub>12.9805</sub>                                                    | 526  | -292.40 | 3598.00   | 0.550  | 0.294 |
| Rb <sub>2</sub> Bi <sub>8</sub> Se <sub>12.9415</sub>                                                    | 823  | -193.20 | 10644.00  | 0.599  | 0.546 |
| Ba <sub>0.95</sub> K <sub>0.05</sub> Zn <sub>2</sub> As <sub>2</sub>                                     | 723  | 86.00   | 72700.00  | 2.404  | 0.162 |
| NbCo <sub>0.96</sub> Ni <sub>0.04</sub> Sn                                                               | 804  | -174.12 | 64142.00  | 6.691  | 0.234 |
| Bi <sub>0.92</sub> Ag <sub>0.08</sub> CuSeO                                                              | 673  | 331.00  | 2210.00   | 0.428  | 0.381 |
| Ag <sub>0.03</sub> Cr <sub>1.97</sub> Se <sub>3</sub>                                                    | 671  | 155.30  | 25536.00  | 1.564  | 0.264 |
| (Sn <sub>0.8</sub> Ge <sub>0.2</sub> ) <sub>0.85</sub> Mn <sub>0.15</sub> Te                             | 773  | 134.00  | 100000.00 | 1.408  | 0.987 |
| Cu <sub>0.995</sub> Pd <sub>0.005</sub> FeS <sub>2</sub>                                                 | 10   | -149.60 | 0.05      | 26.250 | 0.000 |
| Bi <sub>2</sub> Te <sub>3</sub>                                                                          | 426  | -132.80 | 27078.00  | 0.874  | 0.233 |
| Ca <sub>3</sub> Co <sub>3.8</sub> Ti <sub>0.2</sub> O <sub>9</sub>                                       | 900  | 224.00  | 6472.00   | 1.988  | 0.147 |
| Zn <sub>0.96</sub> Al <sub>0.04</sub> O                                                                  | 373  | -65.00  | 63760.00  | 5.830  | 0.017 |
| Ti <sub>0.98</sub> Mn <sub>0.02</sub> NiSn <sub>0.98</sub> Sb <sub>0.02</sub>                            | 598  | -152.43 | 160927.00 | 5.577  | 0.401 |
| (Cu <sub>3</sub> SnS <sub>4</sub> ) <sub>0.875</sub> (Ga <sub>2</sub> Te <sub>3</sub> ) <sub>0.125</sub> | 527  | 116.67  | 68624.00  | 1.929  | 0.255 |
| (SnTe) <sub>8</sub> Sb <sub>2</sub> Te <sub>3</sub>                                                      | 523  | 148.46  | 93924.00  | 1.710  | 0.633 |
| Rb <sub>2</sub> Bi <sub>8</sub> Se <sub>12.9805</sub> Cl <sub>0.0195</sub>                               | 625  | -160.00 | 9338.00   | 0.628  | 0.238 |
| Yb <sub>13</sub> CaMnSb <sub>11</sub>                                                                    | 1163 | 194.10  | 18482.00  | 0.880  | 0.897 |
| NbCo <sub>0.96</sub> Ni <sub>0.04</sub> Sn                                                               | 1002 | -186.47 | 51124.00  | 6.083  | 0.293 |
| Ag <sub>2</sub> Se <sub>1.01</sub>                                                                       | 362  | -137.23 | 135738.00 | 1.124  | 0.823 |
| ZrNiPb <sub>0.98</sub> Bi <sub>0.02</sub>                                                                | 673  | -146.94 | 230500.00 | 7.330  | 0.457 |
| Bi <sub>0.94</sub> Ag <sub>0.06</sub> CuSeO                                                              | 373  | 235.50  | 1576.00   | 0.550  | 0.059 |
| Sn <sub>0.96</sub> Pb <sub>0.01</sub> Cd <sub>0.035</sub> Se                                             | 873  | 294.04  | 8707.00   | 0.343  | 1.917 |
| BiSbSe <sub>2.76</sub> Cl <sub>0.24</sub>                                                                | 600  | -222.00 | 7350.00   | 0.450  | 0.483 |
| Sn <sub>0.96</sub> Pb <sub>0.01</sub> Cd <sub>0.035</sub> Se                                             | 373  | 331.00  | 3651.00   | 0.671  | 0.222 |
| Ca <sub>0.05</sub> BaGd <sub>1.95</sub> NiO <sub>5</sub>                                                 | 632  | 234.56  | 48.11     | 1.684  | 0.001 |
| Na <sub>0.23</sub> Co <sub>4</sub> Sb <sub>12</sub>                                                      | 300  | -169    | 127000.00 | 6.100  | 0.200 |
| Ca <sub>5</sub> Ga <sub>1.9</sub> Zn <sub>0.1</sub> Sb <sub>6</sub>                                      | 624  | 143.40  | 26800.00  | 1.160  | 0.306 |
| Ag <sub>0.01</sub> Sn <sub>0.99</sub> Se                                                                 | 567  | 401.28  | 586.00    | 0.288  | 0.186 |
| Tl <sub>2</sub> GeTe <sub>3</sub>                                                                        | 423  | 227.50  | 3200.00   | 0.290  | 0.242 |
| CoAsSb                                                                                                   | 800  | -91.40  | 89700.00  | 4.604  | 0.130 |
| YbSi <sub>2</sub>                                                                                        | 475  | -39.60  | 641000.00 | 9.933  | 0.048 |
| AgBiSe <sub>2.12</sub>                                                                                   | 450  | 573.00  | 230.25    | 0.653  | 0.052 |

|                                                                                            |     |         |           |       |       |
|--------------------------------------------------------------------------------------------|-----|---------|-----------|-------|-------|
| Bi <sub>2.0</sub> Sb <sub>3.0</sub>                                                        | 323 | -664.10 | 4.00      | 0.710 | 0.001 |
| Ge <sub>0.55</sub> Pb <sub>0.45</sub> Te <sub>0.5</sub> Se <sub>0.5</sub>                  | 721 | 273.13  | 12000.00  | 0.456 | 1.555 |
| Ge <sub>0.55</sub> Pb <sub>0.45</sub> Te                                                   | 721 | 128.57  | 39474.00  | 1.720 | 0.283 |
| Yb <sub>13.43</sub> Ce <sub>0.44</sub> Mn <sub>1.07</sub> Sb <sub>11.07</sub>              | 873 | 196.80  | 16130.00  | 0.632 | 0.863 |
| Hf <sub>0.5</sub> Ti <sub>0.5</sub> CoSb <sub>0.8</sub> Sn <sub>0.2</sub>                  | 989 | 233.40  | 41700.00  | 2.570 | 0.867 |
| Ca <sub>0.1</sub> BaGd <sub>1.9</sub> NiO <sub>5</sub>                                     | 736 | 168.38  | 140.06    | 1.980 | 0.001 |
| In <sub>4</sub> Pb <sub>0.01</sub> Sn <sub>0.03</sub> Se <sub>2.9</sub> Cl <sub>0.06</sub> | 673 | -261.40 | 10400.00  | 0.542 | 0.894 |
| Co <sub>0.97</sub> Ni <sub>0.03</sub> GeTe                                                 | 701 | -112.34 | 74468.00  | 4.298 | 0.153 |
| (PbTe) <sub>0.15</sub> (Ag <sub>2</sub> Te) <sub>0.85</sub>                                | 600 | -191.20 | 17800.00  | 0.493 | 0.792 |
| Ba <sub>7.97</sub> Ga <sub>15.95</sub> Sn <sub>30.05</sub>                                 | 300 | 315.40  | 14140.00  | 0.987 | 0.427 |
| Mg <sub>2</sub> Sn <sub>0.995</sub> Sb <sub>0.005</sub>                                    | 444 | -170.09 | 138596.00 | 4.076 | 0.437 |
| Co <sub>0.95</sub> Ni <sub>0.05</sub> GeTe                                                 | 394 | -54.89  | 158995.00 | 5.649 | 0.033 |
| Ag <sub>0.8</sub> Sb <sub>0.8</sub> Pb <sub>18.3</sub> Te <sub>20.0</sub>                  | 623 | -260.00 | 16000.00  | 0.720 | 0.936 |
| Sn <sub>1.03</sub> Se <sub>0.15</sub> Te <sub>0.85</sub>                                   | 523 | 48.72   | 242609.00 | 3.528 | 0.085 |
| CuAgTe <sub>0.6</sub> Se <sub>0.4</sub>                                                    | 443 | 232.07  | 6386.00   | 0.360 | 0.424 |
| Mg <sub>2.9875</sub> Na <sub>0.0125</sub> Sb <sub>2</sub>                                  | 573 | 152.00  | 28300.00  | 1.110 | 0.338 |
| Cu <sub>2</sub> Se <sub>0.92</sub> S <sub>0.08</sub>                                       | 303 | 97.70   | 103086.00 | 0.730 | 0.408 |
| Ag <sub>2</sub> Te                                                                         | 500 | -117.74 | 51066.00  | 0.576 | 0.614 |
| ZrNiSn                                                                                     | 573 | -152.10 | 58897.00  | 3.573 | 0.219 |
| Sn <sub>0.9</sub> Pb <sub>0.09</sub> Zn <sub>0.01</sub> Se                                 | 373 | 542.20  | 280.00    | 0.977 | 0.031 |
| Bi <sub>0.8</sub> Ba <sub>0.2</sub> CuSeO                                                  | 623 | 202.47  | 11731.00  | 0.709 | 0.539 |
| Ag <sub>2</sub> Se <sub>1.03</sub>                                                         | 310 | -143.20 | 108700.00 | 0.988 | 0.699 |
| Eu <sub>2</sub> Zn <sub>0.96</sub> Sb <sub>2</sub>                                         | 473 | 160.00  | 20850.00  | 0.497 | 0.508 |
| Mg <sub>1.98</sub> Li <sub>0.02</sub> Zn <sub>0.98</sub> Sb <sub>2</sub>                   | 473 | 110.58  | 67302.00  | 1.058 | 0.368 |
| Ba <sub>8</sub> Cu <sub>5</sub> Si <sub>25</sub> Ge <sub>16</sub>                          | 465 | -75.50  | 100000.00 | 1.870 | 0.142 |
| BaBiTe <sub>2.95</sub> Se <sub>0.05</sub>                                                  | 474 | -185.30 | 7830.00   | 0.414 | 0.308 |
| YbCd <sub>1.5</sub> Zn <sub>0.5</sub> Sb <sub>2</sub>                                      | 450 | 149.00  | 73113.00  | 1.420 | 0.570 |
| Yb <sub>13</sub> CaMnSb <sub>11</sub>                                                      | 373 | 61.94   | 43100.00  | 0.789 | 0.069 |
| Bi <sub>1.9</sub> Nb <sub>0.1</sub> Te <sub>3</sub>                                        | 478 | -117.70 | 60000.00  | 0.762 | 0.522 |
| (CuI) <sub>0.003</sub> Bi <sub>2</sub> Te <sub>3</sub>                                     | 371 | -165.74 | 109029.00 | 1.356 | 0.820 |
| Cu <sub>7</sub> P(S <sub>0.25</sub> Se <sub>0.75</sub> ) <sub>6</sub>                      | 673 | 238.00  | 5140.00   | 0.311 | 0.630 |
| Ba <sub>8.01</sub> Ga <sub>15.88</sub> Zn <sub>0.009</sub> Sn <sub>30.11</sub>             | 500 | 450.70  | 5876.00   | 0.855 | 0.698 |
| Cu <sub>11.9</sub> Gd <sub>0.1</sub> Sb <sub>4</sub> S <sub>13</sub>                       | 724 | 138.50  | 64592.00  | 1.368 | 0.656 |

|                                                                            |      |         |           |        |       |
|----------------------------------------------------------------------------|------|---------|-----------|--------|-------|
| Bi <sub>1.92</sub> Nb <sub>0.08</sub> Te <sub>3</sub>                      | 572  | -112.20 | 66667.00  | 0.763  | 0.629 |
| As <sub>2</sub> Te <sub>1.5</sub> Se <sub>1.5</sub>                        | 423  | 589.80  | 21.84     | 0.328  | 0.010 |
| GeSe <sub>0.8</sub> Te <sub>0.2</sub>                                      | 728  | 68.84   | 57090.00  | 1.791  | 0.110 |
| Nb <sub>0.9</sub> Ta <sub>0.1</sub> CoSn <sub>0.9</sub> Sb <sub>0.1</sub>  | 826  | -163.05 | 90496.00  | 4.206  | 0.472 |
| Ge <sub>0.83</sub> In <sub>0.05</sub> Pb <sub>0.12</sub> Te                | 525  | 239.00  | 25109.00  | 1.020  | 0.738 |
| BiCuSeO                                                                    | 347  | 127.63  | 6575.00   | 0.602  | 0.062 |
| Cu <sub>7</sub> P(S <sub>0.6</sub> Se <sub>0.4</sub> ) <sub>6</sub>        | 523  | 275.50  | 1990.00   | 0.225  | 0.351 |
| Mg <sub>3.07</sub> Sb <sub>1.5</sub> Bi <sub>0.47</sub> Se <sub>0.03</sub> | 500  | -301.52 | 10459.00  | 0.706  | 0.674 |
| TiZr <sub>0.015</sub> NiSn                                                 | 626  | -207.94 | 69147.00  | 2.465  | 0.778 |
| Cu <sub>2</sub> S <sub>0.5</sub> Se <sub>0.5</sub>                         | 375  | 215.70  | 1490.00   | 0.544  | 0.048 |
| FeNb <sub>0.9</sub> Zr <sub>0.1</sub> Sb                                   | 500  | 157.50  | 244186.00 | 9.559  | 0.317 |
| Ca <sub>9</sub> Yb <sub>2</sub> Sb <sub>9</sub> Ge                         | 419  | -3.56   | 12371.00  | 0.788  | 0.000 |
| K <sub>8</sub> Al <sub>8</sub> Ge <sub>38</sub>                            | 250  | -27.00  | 41400.00  | 1.191  | 0.006 |
| Ba <sub>1.4</sub> Bi <sub>0.6</sub> CoRuO <sub>6</sub>                     | 418  | 143.30  | 21940.00  | 1.168  | 0.161 |
| Ag <sub>0.02</sub> Cr <sub>1.98</sub> Se <sub>3</sub>                      | 725  | 157.20  | 23300.00  | 1.649  | 0.253 |
| Tb <sub>0.03</sub> Co <sub>4</sub> Sb <sub>12</sub>                        | 300  | -242    | 36600.00  | 4.600  | 0.100 |
| Sr <sub>0.21</sub> Yb <sub>0.03</sub> Co <sub>4</sub> Sb <sub>12.12</sub>  | 850  | -183.00 | 173636.00 | 3.700  | 1.336 |
| ZrNiPb <sub>0.995</sub> Bi <sub>0.005</sub>                                | 303  | -169.00 | 130250.00 | 9.738  | 0.116 |
| Cu <sub>2</sub> Se <sub>0.92</sub> I <sub>0.08</sub>                       | 425  | 197.50  | 9940.00   | 0.522  | 0.316 |
| Cu <sub>12</sub> Sb <sub>4</sub> S <sub>13</sub>                           | 724  | 136.94  | 63403.00  | 1.359  | 0.634 |
| Ba <sub>0.98</sub> K <sub>0.02</sub> Zn <sub>2</sub> As <sub>2</sub>       | 723  | 148.00  | 50000.00  | 1.666  | 0.475 |
| Ba <sub>0.08</sub> Yb <sub>0.09</sub> Co <sub>4</sub> Sb <sub>12</sub>     | 600  | -175.50 | 138000.00 | 2.450  | 1.030 |
| Ag <sub>0.94</sub> CuSe                                                    | 391  | -14.65  | 59903.00  | 1.881  | 0.003 |
| YbCd <sub>1.5</sub> Zn <sub>0.5</sub> Sb <sub>2</sub>                      | 650  | 175.30  | 57600.00  | 1.140  | 1.130 |
| Mg <sub>2</sub> Zn <sub>0.96</sub> Sb <sub>2</sub>                         | 373  | 289.47  | 3411.00   | 0.629  | 0.169 |
| Li <sub>2</sub> Ge <sub>11</sub> Sb <sub>2</sub> Te <sub>15</sub>          | 573  | 170.00  | 115000.00 | 1.848  | 1.036 |
| Co <sub>9</sub> S <sub>8</sub>                                             | 107  | -4.70   | 6740000   | 20.270 | 0.001 |
| CsNd <sub>2</sub> Ag <sub>3</sub> Te <sub>5</sub>                          | 539  | 147.25  | 389.60    | 0.311  | 0.015 |
| GeTe                                                                       | 425  | 44.00   | 460000.00 | 5.552  | 0.068 |
| Cu <sub>1.7</sub> Se                                                       | 672  | 60.40   | 287838.00 | 4.410  | 0.160 |
| Yb <sub>14</sub> MgSb <sub>11</sub>                                        | 1000 | 224.00  | 12800.00  | 0.703  | 0.912 |
| Ag <sub>0.01</sub> Sn <sub>0.99</sub> Se <sub>0.85</sub> S <sub>0.15</sub> | 567  | 426.07  | 458.00    | 0.141  | 0.334 |
| Sr <sub>0.16</sub> Yb <sub>0.03</sub> Co <sub>4</sub> Sb <sub>11.82</sub>  | 800  | -188.00 | 155909.00 | 3.500  | 1.260 |

|                                                                                             |      |         |           |       |       |
|---------------------------------------------------------------------------------------------|------|---------|-----------|-------|-------|
| AgBi <sub>0.95</sub> Sb <sub>0.05</sub> Se <sub>2</sub>                                     | 575  | -13.02  | 147.00    | 0.333 | 0.000 |
| Rb <sub>2</sub> Bi <sub>8</sub> Se <sub>12.9935</sub>                                       | 330  | -220.00 | 8485.00   | 0.712 | 0.190 |
| SnS <sub>0.94</sub> Se <sub>0.06</sub>                                                      | 723  | 370.00  | 9400.00   | 1.030 | 0.903 |
| (Zn <sub>0.9</sub> In <sub>0.1</sub> ) <sub>4</sub> Sb <sub>3</sub>                         | 473  | 202.00  | 13120.00  | 0.814 | 0.311 |
| Ca <sub>0.25</sub> BaGd <sub>1.75</sub> NiO <sub>5</sub>                                    | 891  | 141.91  | 345.04    | 1.314 | 0.005 |
| Ag <sub>0.01</sub> Cr <sub>1.99</sub> Se <sub>3</sub>                                       | 300  | 88.86   | 39607.00  | 1.635 | 0.057 |
| Mg <sub>3.5</sub> Ho <sub>0.02</sub> Sb <sub>2</sub>                                        | 700  | -333.57 | 6819.00   | 0.717 | 0.741 |
| Ca <sub>3.2</sub> Yb <sub>1.65</sub> Pr <sub>0.15</sub> Al <sub>2</sub> Sb <sub>6</sub>     | 723  | 55.40   | 4200.00   | 1.492 | 0.006 |
| Er <sub>0.02</sub> (Bi <sub>0.23</sub> Sb <sub>0.77</sub> ) <sub>1.98</sub> Te <sub>3</sub> | 350  | 236.15  | 49561.00  | 0.801 | 1.208 |
| Rb <sub>2</sub> Bi <sub>8</sub> Se <sub>12.9805</sub> Cl <sub>0.0195</sub>                  | 428  | -131.82 | 14485.00  | 0.705 | 0.153 |
| YbCd <sub>1.8</sub> Zn <sub>0.2</sub> Sb <sub>4</sub>                                       | 550  | 182.45  | 45691.00  | 1.374 | 0.609 |
| Ti <sub>0.95</sub> Mn <sub>0.05</sub> NiSn <sub>0.95</sub> Sb <sub>0.05</sub>               | 598  | -140.87 | 197351.00 | 5.855 | 0.400 |
| Mg <sub>3.5</sub> Gd <sub>0.03</sub> Sb <sub>2</sub>                                        | 500  | -254.23 | 16667.00  | 0.860 | 0.626 |
| Sn <sub>0.98</sub> In <sub>0.02</sub> Se                                                    | 673  | 461.00  | 195.00    | 0.630 | 0.046 |
| Ag(Bi <sub>0.8</sub> Nb <sub>0.2</sub> ) <sub>0.7</sub> Sb <sub>0.3</sub> Se <sub>2</sub>   | 576  | -229.00 | 5754.00   | 0.579 | 0.300 |
| Sn <sub>0.87</sub> Mn <sub>0.1</sub> Bi <sub>0.03</sub> Te                                  | 373  | 64.00   | 240000.00 | 4.075 | 0.090 |
| Ba <sub>0.38</sub> Co <sub>4</sub> Sb <sub>11.74</sub>                                      | 300  | -70     | 393900.00 | 2.400 | 0.100 |
| Sr <sub>0.11</sub> Ba <sub>0.18</sub> Co <sub>4</sub> Sb <sub>12.09</sub>                   | 700  | -154.00 | 231818.00 | 3.870 | 0.994 |
| AgBiSe <sub>2</sub>                                                                         | 550  | 460.94  | 405.00    | 0.483 | 0.107 |
| Bi <sub>0.48</sub> Sb <sub>1.52</sub> Te <sub>3</sub>                                       | 350  | 239.59  | 50000.00  | 1.222 | 0.822 |
| Mg <sub>1.98</sub> K <sub>0.02</sub> Zn <sub>0.98</sub> Sb <sub>2</sub>                     | 573  | 233.86  | 8254.00   | 0.668 | 0.387 |
| YbCd <sub>2</sub> Sb <sub>2</sub>                                                           | 450  | 125.50  | 89080.00  | 1.448 | 0.436 |
| Yb <sub>8</sub> Ca <sub>5</sub> BaMgSb <sub>11</sub>                                        | 1100 | 222.00  | 11320.00  | 0.643 | 0.954 |
| Sr <sub>0.40</sub> Co <sub>4</sub> Sb <sub>12.54</sub>                                      | 850  | -123    | 206000.00 | 0.600 | 0.700 |
| K <sub>0.985</sub> Ba <sub>0.015</sub> GaSb <sub>4</sub>                                    | 416  | -184.00 | 24338.00  | 0.957 | 0.358 |
| Sn <sub>1.03</sub> Se <sub>0.08</sub> Te <sub>0.92</sub>                                    | 323  | 12.63   | 557018.00 | 6.308 | 0.005 |
| MgAgSb <sub>0.99</sub> In <sub>0.01</sub>                                                   | 500  | 202.73  | 57455.00  | 1.151 | 1.026 |
| NbCo <sub>0.95</sub> Pt <sub>0.05</sub> Sn                                                  | 319  | -123.20 | 135870.00 | 4.650 | 0.130 |
| Mg <sub>3.5</sub> Ho <sub>0.04</sub> Sb <sub>2</sub>                                        | 600  | -292.55 | 12029.00  | 0.825 | 0.749 |
| ZrNiPb <sub>0.92</sub> Sn <sub>0.6</sub> Bi <sub>0.02</sub>                                 | 475  | -126.90 | 276964.00 | 5.837 | 0.363 |
| Cu <sub>2.025</sub> Cd <sub>0.975</sub> SnSe <sub>4</sub>                                   | 650  | 200.00  | 6448.00   | 0.854 | 0.196 |
| Ag <sub>0.4</sub> Sb <sub>1.1</sub> Pb <sub>19.6</sub> Te <sub>18.8</sub>                   | 523  | -68.80  | 17450.00  | 1.378 | 0.031 |
| Ba <sub>8.02</sub> Cu <sub>4.98</sub> Si <sub>35</sub> Ge <sub>5.99</sub>                   | 665  | -90.00  | 95350.00  | 2.253 | 0.239 |



|                                                                              |     |         |           |        |       |
|------------------------------------------------------------------------------|-----|---------|-----------|--------|-------|
| AgBi <sub>0.99</sub> Pb <sub>0.01</sub> Se <sub>2.12</sub>                   | 450 | 482.30  | 1095.00   | 0.550  | 0.208 |
| (Sn <sub>0.8</sub> Ge <sub>0.2</sub> ) <sub>0.82</sub> Mn <sub>0.18</sub> Te | 673 | 126.00  | 108900.00 | 1.540  | 0.756 |
| Dy <sub>0.02</sub> Co <sub>4</sub> Sb <sub>12</sub>                          | 550 | -303    | 22600.00  | 3.400  | 0.300 |
| Yb <sub>14</sub> MgSb <sub>11</sub>                                          | 700 | 157.40  | 17800.00  | 0.771  | 0.400 |
| Tl <sub>9.0</sub> Bi <sub>0.95</sub> Te <sub>6.0</sub>                       | 385 | 157.70  | 30000.00  | 0.550  | 0.522 |
| Li <sub>0.03</sub> Cu <sub>1.81</sub> Bi <sub>0.04</sub> Se                  | 606 | 107.70  | 70115.00  | 1.428  | 0.345 |
| Pb <sub>0.98</sub> Tl <sub>0.01</sub> Na <sub>0.01</sub> Te                  | 497 | 193.14  | 55674.00  | 1.563  | 0.661 |
| Sn <sub>1.03</sub> Se <sub>0.12</sub> Te <sub>0.87</sub> Br <sub>0.01</sub>  | 623 | 103.08  | 200000.00 | 2.509  | 0.453 |
| Ca <sub>3</sub> Al <sub>0.95</sub> Zn <sub>0.05</sub> Sb <sub>3</sub>        | 822 | 275.80  | 4130.00   | 0.660  | 0.391 |
| Sb <sub>2</sub> Si <sub>2</sub> Te <sub>6</sub>                              | 773 | 222.28  | 12361.00  | 0.419  | 1.127 |
| FeVSb                                                                        | 600 | -235.00 | 52100.00  | 6.500  | 0.277 |
| Bi <sub>2.0</sub> S <sub>2.79</sub> Se <sub>0.21</sub>                       | 423 | -529.70 | 379.00    | 0.608  | 0.074 |
| Cu <sub>0.995</sub> Pd <sub>0.005</sub> FeS <sub>2</sub>                     | 70  | -487.00 | 264.20    | 29.430 | 0.000 |
| Ag <sub>8</sub> Sn <sub>0.7</sub> Ga <sub>0.3</sub> Se <sub>6</sub>          | 313 | -549.53 | 33.00     | 0.216  | 0.014 |
| Zn <sub>0.9</sub> Cd <sub>0.1</sub> Sc <sub>0.04</sub> O <sub>1.06</sub>     | 300 | -84.30  | 46667.00  | 8.000  | 0.012 |
| Ca <sub>14</sub> MgSb <sub>11</sub>                                          | 500 | 123.00  | 4150.00   | 0.632  | 0.492 |
| La <sub>0.1</sub> Ca <sub>0.9</sub> TiO <sub>3</sub>                         | 538 | -129.40 | 26340.00  | 3.500  | 0.068 |
| Ca <sub>3</sub> Co <sub>2</sub> O <sub>6</sub>                               | 773 | 146.00  | 4570.00   | 4.640  | 0.016 |
| Ag <sub>0.03</sub> Cu <sub>1.945</sub> S <sub>0.5</sub> Se <sub>0.5</sub>    | 673 | 202.13  | 26176.00  | 0.817  | 0.700 |
| Bi <sub>0.94</sub> Ag <sub>0.06</sub> CuSeO                                  | 673 | 322.30  | 1934.00   | 0.487  | 0.278 |
| Cu <sub>2.94</sub> Ag <sub>0.06</sub> SbSe <sub>4</sub>                      | 348 | 428.00  | 5714.00   | 1.850  | 0.197 |
| Mg <sub>0.95</sub> Li <sub>0.05</sub> Ge <sub>0.9</sub> Si <sub>0.1</sub>    | 500 | 293.30  | 11700.00  | 3.031  | 0.166 |
| Ba <sub>1.9</sub> Bi <sub>0.1</sub> CoRuO <sub>6</sub>                       | 318 | 65.40   | 28500.00  | 1.444  | 0.027 |
| Ca <sub>3</sub> Co <sub>3.8</sub> Ti <sub>0.2</sub> O <sub>9</sub>           | 300 | 149.00  | 4967.00   | 2.490  | 0.013 |
| Y <sub>0.2</sub> Bi <sub>1.8</sub> Te <sub>3</sub>                           | 498 | -152.33 | 59045.00  | 0.829  | 0.827 |
| Ta <sub>0.98</sub> Ti <sub>0.02</sub> FeSb                                   | 670 | 278.00  | 40700.00  | 5.593  | 0.375 |
| Zn <sub>0.9</sub> Cd <sub>0.1</sub> Sc <sub>0.01</sub> O <sub>1.015</sub>    | 673 | -112.00 | 44400.00  | 4.394  | 0.085 |
| Ca <sub>5</sub> Ga <sub>1.95</sub> Zn <sub>0.05</sub> Sb <sub>6</sub>        | 724 | 175.60  | 15320.00  | 0.914  | 0.374 |
| Cu <sub>11.6</sub> Gd <sub>0.4</sub> Sb <sub>4</sub> S <sub>13</sub>         | 625 | 118.13  | 86315.00  | 1.394  | 0.540 |
| Tl <sub>9.0</sub> Sb <sub>0.97</sub> Te <sub>6</sub>                         | 327 | 104.00  | 50000.00  | 0.730  | 0.242 |
| Zn <sub>0.9</sub> Cd <sub>0.1</sub> Sc <sub>0.01</sub> O <sub>1.015</sub>    | 773 | -120.50 | 40400.00  | 4.000  | 0.113 |
| Sr <sub>0.21</sub> Yb <sub>0.03</sub> Co <sub>4</sub> Sb <sub>12.12</sub>    | 300 | -109.00 | 342273.00 | 4.230  | 0.288 |
| Cu <sub>1.85</sub> Ag <sub>0.15</sub> SnSe <sub>3</sub>                      | 600 | 342.42  | 1316.00   | 0.410  | 0.226 |

|                                                                                                                     |      |         |           |       |       |
|---------------------------------------------------------------------------------------------------------------------|------|---------|-----------|-------|-------|
| AgBiSe <sub>2.12</sub>                                                                                              | 300  | 636.84  | 44.89     | 0.639 | 0.009 |
| Bi <sub>0.96</sub> Pb <sub>0.02</sub> Yb <sub>0.02</sub> CuSeO                                                      | 640  | 189.47  | 13061.00  | 0.584 | 0.514 |
| NbCo <sub>0.96</sub> Ni <sub>0.04</sub> Sn                                                                          | 704  | -164.41 | 72189.00  | 7.262 | 0.189 |
| Mg <sub>2</sub> Cu <sub>3</sub> In <sub>3</sub> Te <sub>8</sub>                                                     | 720  | 276.00  | 6965.00   | 1.197 | 0.319 |
| Ce <sub>0.75</sub> Fe <sub>3</sub> CoSb <sub>12</sub>                                                               | 513  | 88.60   | 110244.00 | 6.459 | 0.069 |
| Mg <sub>0.97</sub> Li <sub>0.03</sub> Ge <sub>0.9</sub> Si <sub>0.1</sub>                                           | 400  | 216.78  | 33154.00  | 3.805 | 0.164 |
| La <sub>0.2</sub> Ca <sub>0.8</sub> TiO <sub>3</sub>                                                                | 432  | -72.00  | 192473.00 | 3.776 | 0.114 |
| Tl <sub>9.0</sub> Bi <sub>0.97</sub> Te <sub>6.0</sub>                                                              | 443  | 195.00  | 22000.00  | 0.474 | 0.782 |
| EuZn <sub>2</sub> Sb <sub>2</sub>                                                                                   | 600  | 177.00  | 65385.00  | 1.490 | 0.825 |
| Cu <sub>10.5</sub> Ni <sub>1.5</sub> Sb <sub>4</sub> S <sub>13</sub>                                                | 323  | 136.40  | 16380.00  | 0.632 | 0.156 |
| SnS <sub>0.97</sub> Se <sub>0.03</sub>                                                                              | 423  | 252.80  | 41300.00  | 2.190 | 0.508 |
| Mg <sub>3</sub> Sb <sub>1.8</sub> Bi <sub>0.2</sub>                                                                 | 750  | 409.00  | 2500.00   | 0.550 | 0.570 |
| Cu <sub>2.1</sub> Se                                                                                                | 870  | 147.52  | 81081.00  | 1.775 | 0.865 |
| CaTiO <sub>3</sub>                                                                                                  | 1016 | -369.00 | 1400.00   | 2.750 | 0.070 |
| Sr <sub>0.21</sub> Yb <sub>0.03</sub> Co <sub>4</sub> Sb <sub>12.12</sub>                                           | 700  | -170.00 | 194091.00 | 3.600 | 1.091 |
| Ti <sub>0.97</sub> Al <sub>0.03</sub> O <sub>2</sub>                                                                | 296  | -322.67 | 2077.00   | 5.812 | 0.011 |
| Ga <sub>0.03</sub> Co <sub>4</sub> Sb <sub>11.985</sub> Ga <sub>0.015</sub>                                         | 600  | -323    | 11700.00  | 2.300 | 0.300 |
| (Cu <sub>0.003</sub> Pb <sub>0.997</sub> Te)(MnTe) <sub>0.03</sub>                                                  | 723  | -171.05 | 65655.00  | 1.371 | 1.013 |
| Zn <sub>0.9</sub> Cd <sub>0.1</sub> Sc <sub>0.04</sub> O <sub>1.06</sub>                                            | 773  | -131.30 | 31000.00  | 3.955 | 0.104 |
| Cu <sub>3</sub> ErTe <sub>3</sub>                                                                                   | 800  | 101.00  | 46667.00  | 0.700 | 0.544 |
| Mg <sub>2</sub> Cu <sub>3</sub> In <sub>3</sub> Te <sub>8</sub>                                                     | 335  | 311.30  | 1483.00   | 3.577 | 0.013 |
| Ag <sub>0.01</sub> Sn <sub>0.99</sub> Se <sub>0.9</sub> S <sub>0.1</sub>                                            | 418  | 347.44  | 1108.00   | 0.263 | 0.213 |
| Mo <sub>3</sub> Sb <sub>7</sub> I                                                                                   | 623  | 42.49   | 460700.00 | 6.197 | 0.086 |
| CuAgTe <sub>0.6</sub> Se <sub>0.4</sub>                                                                             | 383  | 220.92  | 8060.00   | 0.320 | 0.471 |
| Ta <sub>0.92</sub> Ti <sub>0.08</sub> FeSb                                                                          | 970  | 258.00  | 69750.00  | 3.950 | 1.140 |
| Cu <sub>2</sub> Se <sub>0.92</sub> I <sub>0.08</sub>                                                                | 365  | 154.80  | 10657.00  | 0.248 | 0.376 |
| Mg <sub>2.975</sub> Na <sub>0.025</sub> Sb <sub>2</sub>                                                             | 673  | 142.00  | 33500.00  | 1.210 | 0.376 |
| SnSe <sub>0.9</sub> S <sub>0.1</sub>                                                                                | 300  | 186.08  | 530.00    | 1.416 | 0.004 |
| Ca <sub>3</sub> Co <sub>3.9</sub> Ti <sub>0.1</sub> O <sub>9</sub>                                                  | 1000 | 213.60  | 7100.00   | 2.034 | 0.159 |
| (Ag <sub>0.15</sub> Sb <sub>0.15</sub> Sn <sub>0.7</sub> )(S <sub>0.15</sub> Se <sub>0.15</sub> Te <sub>0.7</sub> ) | 753  | 143.60  | 55140.00  | 1.189 | 0.720 |
| AgSn <sub>15.0</sub> BiTe <sub>17.0</sub>                                                                           | 500  | 123.00  | 121153.00 | 2.090 | 0.438 |
| CoSb <sub>3.0</sub>                                                                                                 | 323  | -224.00 | 3571.00   | 6.900 | 0.008 |

|                                                                                             |      |         |           |       |       |
|---------------------------------------------------------------------------------------------|------|---------|-----------|-------|-------|
| Ag <sub>8</sub> Sn <sub>0.6</sub> Ga <sub>0.4</sub> Se <sub>6</sub>                         | 691  | -159.11 | 16568.00  | 0.298 | 0.974 |
| LiCo <sub>0.98</sub> Ni <sub>0.02</sub> O <sub>2</sub>                                      | 323  | 342.07  | 0.00      | 2.250 | 0.000 |
| Sn <sub>0.8</sub> Ge <sub>0.2</sub> Te                                                      | 473  | 53.70   | 329200.00 | 4.719 | 0.095 |
| YbCd <sub>1.9</sub> Zn <sub>0.1</sub> Sb <sub>2</sub>                                       | 650  | 182.00  | 41600.00  | 1.312 | 0.683 |
| Hf <sub>0.5</sub> Ti <sub>0.5</sub> CoSb <sub>0.8</sub> Sn <sub>0.2</sub>                   | 779  | 238.50  | 37900.00  | 2.465 | 0.685 |
| GeSe <sub>0.75</sub> Te <sub>0.25</sub>                                                     | 630  | 35.69   | 60821.00  | 1.524 | 0.032 |
| Ca <sub>5</sub> Ga <sub>1.7</sub> Zn <sub>0.3</sub> Sb <sub>6</sub>                         | 425  | 70.00   | 56499.00  | 1.677 | 0.070 |
| Cu <sub>2</sub> Se                                                                          | 550  | 125.66  | 64231.00  | 1.130 | 0.494 |
| Cu <sub>26</sub> V <sub>2</sub> Ge <sub>3</sub> Sb <sub>3</sub> S <sub>32</sub>             | 594  | 185.65  | 29781.00  | 1.045 | 0.583 |
| Pb <sub>0.99</sub> Na <sub>0.01</sub> Te                                                    | 696  | 261.76  | 33630.00  | 1.039 | 1.544 |
| Yb <sub>14</sub> MnSb <sub>11</sub>                                                         | 525  | 84.00   | 35500.00  | 1.060 | 0.124 |
| AgBi <sub>0.9</sub> Sb <sub>0.1</sub> Se <sub>2</sub>                                       | 400  | 460.94  | 26.60     | 0.399 | 0.006 |
| Tl <sub>8.98</sub> Sb <sub>1.02</sub> Te <sub>6</sub>                                       | 385  | 140.00  | 34220.00  | 0.540 | 0.478 |
| Eu(Zn <sub>0.7</sub> Cd <sub>0.3</sub> ) <sub>2</sub> Sb <sub>2</sub>                       | 300  | 148.00  | 57000.00  | 1.838 | 0.204 |
| Mo <sub>3</sub> Sb <sub>7</sub> I <sub>1.5</sub>                                            | 823  | 42.60   | 343854.00 | 5.785 | 0.088 |
| Ag <sub>0.03</sub> Cr <sub>1.97</sub> Se <sub>3</sub>                                       | 405  | 114.00  | 34821.00  | 1.514 | 0.124 |
| Cu <sub>2</sub> SnSe <sub>3</sub>                                                           | 423  | 100.85  | 12245.00  | 2.046 | 0.026 |
| Ba <sub>2</sub> CoRuO <sub>6</sub>                                                          | 418  | 26.00   | 102900.00 | 1.462 | 0.020 |
| Ag <sub>2</sub> Se <sub>1.04</sub>                                                          | 377  | -137.02 | 131311.00 | 1.114 | 0.834 |
| Mg <sub>3.5</sub> Gd <sub>0.02</sub> Sb <sub>2</sub>                                        | 700  | -318.66 | 7279.00   | 0.691 | 0.748 |
| Zn <sub>0.85</sub> Cd <sub>0.15</sub> Sc <sub>0.02</sub> O <sub>1.03</sub>                  | 1173 | -133.00 | 12500.00  | 3.150 | 0.082 |
| Ag <sub>3.5</sub> Mo <sub>9</sub> Se <sub>11</sub>                                          | 743  | 138.60  | 32300.00  | 1.100 | 0.419 |
| Zn <sub>0.9</sub> Cd <sub>0.1</sub> Sc <sub>0.04</sub> O <sub>1.06</sub>                    | 973  | -151.00 | 25520.00  | 3.250 | 0.174 |
| Ba <sub>8.01</sub> Ga <sub>15.88</sub> Zn <sub>0.009</sub> Sn <sub>30.11</sub>              | 300  | 368.90  | 7591.00   | 0.948 | 0.327 |
| Ba <sub>0.16</sub> Co <sub>4</sub> Sb <sub>11.85</sub>                                      | 850  | -190    | 113000.00 | 2.500 | 0.800 |
| Cu <sub>1.5</sub> S                                                                         | 350  | 13.87   | 570952.00 | 4.360 | 0.009 |
| In <sub>0.005</sub> Pb <sub>0.995</sub> Te <sub>0.999</sub> I <sub>0.001</sub>              | 585  | -269.00 | 13050.00  | 1.350 | 0.405 |
| (Zn <sub>0.98</sub> In <sub>0.02</sub> ) <sub>4</sub> Sb <sub>3</sub>                       | 373  | 136.20  | 34540.00  | 0.824 | 0.290 |
| Ag(Bi <sub>0.85</sub> Pb <sub>0.15</sub> ) <sub>0.9</sub> Sb <sub>0.1</sub> Se <sub>2</sub> | 478  | 437.50  | 500.00    | 0.508 | 0.090 |
| Mg <sub>3.07</sub> Sb <sub>1.5</sub> Bi <sub>0.48</sub> Se <sub>0.02</sub>                  | 500  | -298.26 | 11689.00  | 0.707 | 0.735 |
| Ag <sub>0.96</sub> Nb <sub>0.04</sub> BiSe <sub>2.0</sub>                                   | 296  | -85.00  | 22100.00  | 0.720 | 0.066 |
| GeSe <sub>0.85</sub> Te <sub>0.15</sub>                                                     | 530  | 28.21   | 59328.00  | 1.718 | 0.015 |
| Rb <sub>2</sub> Bi <sub>8</sub> Se <sub>12.909</sub>                                        | 724  | -194.20 | 9120.00   | 0.625 | 0.398 |

|                                                                                           |     |         |           |       |       |
|-------------------------------------------------------------------------------------------|-----|---------|-----------|-------|-------|
| Mg <sub>1.96</sub> Li <sub>0.04</sub> Zn <sub>0.98</sub> Sb <sub>2</sub>                  | 300 | 52.38   | 153439.00 | 1.417 | 0.089 |
| Cu <sub>2</sub> Se <sub>0.92</sub> I <sub>0.08</sub>                                      | 359 | 191.00  | 8986.00   | 0.140 | 0.841 |
| Ba <sub>8.04</sub> Cu <sub>4.99</sub> Si <sub>18</sub> Ge <sub>22.98</sub>                | 615 | -160.00 | 25000.00  | 1.526 | 0.257 |
| Zn <sub>2</sub> Cu <sub>3</sub> In <sub>3</sub> Te <sub>8</sub>                           | 572 | 190.00  | 13482.00  | 1.613 | 0.173 |
| Pb <sub>6</sub> Bi <sub>2</sub> Se <sub>9</sub>                                           | 323 | -75.00  | 33154.00  | 1.125 | 0.054 |
| Rb <sub>7.88</sub> Au <sub>2.47</sub> Ge <sub>43.53</sub>                                 | 200 | -9.37   | 388.47    | 1.769 | 0.000 |
| Cu <sub>1.875</sub> Ag <sub>0.125</sub> SnSe <sub>3</sub>                                 | 400 | 196.43  | 2571.00   | 0.778 | 0.051 |
| S <sub>0.05</sub> Pd <sub>0.15</sub> Co <sub>3.85</sub> Sb <sub>12.03</sub>               | 300 | -226    | 58000.00  | 3.400 | 0.200 |
| Cu <sub>11.8</sub> Gd <sub>0.2</sub> Sb <sub>4</sub> S <sub>13</sub>                      | 625 | 115.70  | 90019.00  | 1.444 | 0.522 |
| Sn <sub>0.91</sub> Mn <sub>0.09</sub> Te <sub>0.98</sub> I <sub>0.02</sub>                | 622 | 133.51  | 103077.00 | 2.280 | 0.501 |
| AgBi <sub>0.97</sub> Pb <sub>0.03</sub> Se <sub>2.12</sub>                                | 300 | 421.85  | 930.00    | 0.517 | 0.096 |
| Cu <sub>1.97</sub> In <sub>0.03</sub> Se                                                  | 672 | 205.97  | 26174.00  | 0.813 | 0.927 |
| Mg <sub>3.5</sub> Ho <sub>0.04</sub> Sb <sub>1.97</sub> Te <sub>0.03</sub>                | 400 | -210.92 | 24310.00  | 0.992 | 0.436 |
| Ag(Bi <sub>0.8</sub> Pb <sub>0.2</sub> ) <sub>0.7</sub> Sb <sub>0.3</sub> Se <sub>2</sub> | 478 | 291.80  | 1778.00   | 2.342 | 0.031 |
| Li <sub>0.03</sub> Cu <sub>1.85</sub> Se                                                  | 603 | 51.58   | 232692.00 | 2.627 | 0.142 |
| CoAsSb                                                                                    | 500 | -130.82 | 34704.00  | 3.034 | 0.098 |
| Cu <sub>22</sub> Sn <sub>10</sub> S <sub>32</sub>                                         | 400 | 57.03   | 195652.00 | 3.030 | 0.084 |
| AgBiSe <sub>2.0</sub>                                                                     | 478 | -188.00 | 5664.00   | 0.635 | 0.151 |
| BiCu <sub>0.975</sub> SeO                                                                 | 323 | 167.59  | 2330.00   | 0.787 | 0.027 |
| Cu <sub>7</sub> P(S <sub>0.55</sub> Se <sub>0.45</sub> ) <sub>6</sub>                     | 673 | 271.50  | 2300.00   | 0.215 | 0.531 |
| GeSe                                                                                      | 673 | 688.40  | 114.98    | 0.985 | 0.037 |
| Eu <sub>2</sub> Zn <sub>0.98</sub> Sb <sub>2</sub>                                        | 623 | 233.00  | 10646.00  | 0.435 | 0.828 |
| (CaZn <sub>0.4</sub> Ag <sub>0.2</sub> Sb) <sub>0.87</sub> (LiZnSb) <sub>0.13</sub>       | 673 | 193.40  | 20251.00  | 0.548 | 0.930 |
| AgMo <sub>6</sub> Te <sub>8</sub>                                                         | 500 | 13.70   | 168000.00 | 3.990 | 0.004 |
| Cu <sub>1.85</sub> Ag <sub>0.15</sub> SnSe <sub>3</sub>                                   | 300 | 249.00  | 1070.00   | 0.984 | 0.020 |
| Gd <sub>2</sub> Se <sub>2.92</sub>                                                        | 850 | -157.97 | 15031.00  | 1.022 | 0.312 |
| Cu <sub>1.95</sub> In <sub>0.05</sub> Se                                                  | 572 | 271.64  | 6757.00   | 1.700 | 0.198 |
| CsSm <sub>2</sub> Ag <sub>3</sub> Te <sub>5</sub>                                         | 385 | 58.80   | 88.24     | 0.607 | 0.000 |
| Cu <sub>1.875</sub> Ag <sub>0.125</sub> SnSe <sub>3</sub>                                 | 700 | 312.24  | 2847.00   | 0.419 | 0.464 |
| Cu <sub>2</sub> Se <sub>0.98</sub> S <sub>0.02</sub>                                      | 353 | 102.63  | 98235.00  | 0.742 | 0.492 |
| Cu <sub>2</sub> Se <sub>0.96</sub> S <sub>0.04</sub>                                      | 550 | 153.29  | 43490.00  | 0.880 | 0.639 |
| (PbTe)(MnTe) <sub>0.03</sub>                                                              | 773 | -252.98 | 22069.00  | 1.125 | 0.970 |
| Sn <sub>0.8</sub> Ge <sub>0.2</sub> Te                                                    | 373 | 44.70   | 410900.00 | 4.840 | 0.065 |

|                                                                               |     |         |           |        |       |
|-------------------------------------------------------------------------------|-----|---------|-----------|--------|-------|
| Co <sub>9</sub> S <sub>8</sub>                                                | 41  | -2.20   | 41450510  | 33.170 | 0.000 |
| Cu <sub>2</sub> Se <sub>0.5</sub> S <sub>0.5</sub>                            | 333 | 46.04   | 131429.00 | 1.189  | 0.078 |
| MgAgSb <sub>0.995</sub> In <sub>0.005</sub>                                   | 350 | 179.50  | 48545.00  | 1.095  | 0.516 |
| Bi <sub>1.2</sub> Sb <sub>0.8</sub> Se <sub>2.76</sub> Cl <sub>0.24</sub>     | 500 | -143.00 | 23923.00  | 0.650  | 0.376 |
| Bi <sub>2</sub> Si <sub>2</sub> Te <sub>6</sub>                               | 373 | 119.15  | 12037.00  | 0.849  | 0.075 |
| Cu <sub>5</sub> SnSbSe <sub>7</sub>                                           | 673 | 64.83   | 242609.00 | 3.802  | 0.180 |
| Co <sub>0.97</sub> Ni <sub>0.03</sub> GeTe                                    | 776 | -104.26 | 80585.00  | 4.473  | 0.152 |
| CuAgTe <sub>0.7</sub> Se <sub>0.3</sub>                                       | 443 | 246.20  | 6675.00   | 0.310  | 0.579 |
| In <sub>4</sub> Se <sub>2.67</sub> Cl <sub>0.03</sub>                         | 523 | -164.80 | 40910.00  | 0.661  | 0.879 |
| EuCd <sub>2</sub> Sb <sub>2</sub>                                             | 400 | 267.00  | 9260.00   | 1.080  | 0.244 |
| Bi <sub>0.96</sub> Pb <sub>0.04</sub> CuSeO                                   | 150 | 94.33   | 100000.00 | 2.051  | 0.065 |
| Sn <sub>0.965</sub> Pb <sub>0.01</sub> Cd <sub>0.025</sub> Se                 | 823 | 298.34  | 7603.00   | 0.425  | 1.311 |
| (SnTe) <sub>8</sub> Sb <sub>2</sub> Te <sub>3</sub>                           | 623 | 170.90  | 77100.00  | 1.650  | 0.850 |
| In <sub>3.99</sub> Pb <sub>0.01</sub> Se <sub>3</sub>                         | 405 | -221.00 | 10700.00  | 0.970  | 0.218 |
| GeSe                                                                          | 424 | 737.68  | 15.52     | 2.010  | 0.002 |
| Tl <sub>2</sub> GeTe <sub>3</sub>                                             | 473 | 234.50  | 3030.00   | 0.270  | 0.292 |
| TiZr <sub>0.025</sub> NiSn                                                    | 630 | -193.28 | 65846.00  | 2.689  | 0.587 |
| Sn <sub>1.03</sub> Se <sub>0.12</sub> Te <sub>0.88</sub>                      | 623 | 88.20   | 150000.00 | 2.887  | 0.252 |
| Cu <sub>22</sub> Sn <sub>9</sub> SbS <sub>32</sub>                            | 500 | 109.51  | 73711.00  | 1.929  | 0.229 |
| Ca <sub>3</sub> Al <sub>0.95</sub> Zn <sub>0.05</sub> Sb <sub>3</sub>         | 722 | 272.00  | 4283.00   | 0.718  | 0.294 |
| Cu <sub>3</sub> Sb <sub>0.997</sub> In <sub>0.003</sub> Se <sub>4</sub>       | 573 | 288.40  | 8410.00   | 1.115  | 0.364 |
| Pb <sub>0.99</sub> Tl <sub>0.01</sub> Te                                      | 497 | 217.53  | 36622.00  | 1.461  | 0.589 |
| Ag <sub>2.0</sub> Se <sub>0.5</sub> Te <sub>0.5</sub>                         | 300 | -90.70  | 61743.00  | 0.610  | 0.250 |
| Cu <sub>26</sub> V <sub>2</sub> Ge <sub>5</sub> SbS <sub>32</sub>             | 309 | 39.90   | 334375.00 | 3.648  | 0.045 |
| CrO <sub>0.09</sub> N <sub>0.9</sub>                                          | 275 | -46.40  | 33713.00  | 2.681  | 0.007 |
| Rb <sub>2</sub> Bi <sub>8</sub> Se <sub>12.909</sub>                          | 823 | -185.00 | 11200.00  | 0.620  | 0.509 |
| Ag <sub>1.3</sub> Sb <sub>0.9</sub> Pb <sub>15.7</sub> Te <sub>22.0</sub>     | 373 | 448.78  | 940.25    | 1.044  | 0.040 |
| Cu <sub>2</sub> Se <sub>0.98</sub> S <sub>0.02</sub>                          | 750 | 205.97  | 27926.00  | 0.822  | 1.081 |
| Ti <sub>0.98</sub> Mn <sub>0.02</sub> NiSn <sub>0.98</sub> Sb <sub>0.02</sub> | 297 | -107.68 | 162252.00 | 6.128  | 0.091 |
| Cu <sub>2</sub> Zn <sub>0.6</sub> Fe <sub>0.4</sub> SnSe <sub>4</sub>         | 773 | 281.50  | 3670.00   | 0.854  | 0.263 |
| Cu <sub>12</sub> Sb <sub>4</sub> S <sub>13</sub>                              | 625 | 112.69  | 83333.00  | 1.515  | 0.437 |
| FeNb <sub>0.92</sub> Ti <sub>0.08</sub> Sb                                    | 500 | 168.00  | 200000.00 | 9.400  | 0.300 |
| NbCo <sub>0.9</sub> Ni <sub>0.1</sub> Sn                                      | 600 | -170.59 | 78333.00  | 7.274  | 0.188 |

|                                                                                               |       |         |           |       |       |
|-----------------------------------------------------------------------------------------------|-------|---------|-----------|-------|-------|
| CsNd <sub>2</sub> Ag <sub>3</sub> Te <sub>5</sub>                                             | 616   | 150.00  | 694.00    | 0.357 | 0.027 |
| TmCuTe <sub>2</sub>                                                                           | 320   | 73.70   | 95941.00  | 1.577 | 0.106 |
| Cu <sub>2</sub> Se <sub>0.94</sub> S <sub>0.06</sub>                                          | 333   | 102.63  | 102454.00 | 0.732 | 0.491 |
| Cu <sub>11</sub> ZnSb <sub>4</sub> S <sub>13</sub>                                            | 322   | 130.60  | 9622.00   | 0.430 | 0.123 |
| Mg <sub>3.5</sub> Gd <sub>0.045</sub> Sb <sub>2</sub>                                         | 300   | -196.43 | 23049.00  | 1.207 | 0.221 |
| In <sub>0.015</sub> Pb <sub>0.985</sub> Te <sub>0.994</sub> l <sub>0.006</sub>                | 533   | -220.10 | 24200.00  | 1.440 | 0.437 |
| Tl <sub>8.97</sub> Sb <sub>1.03</sub> Te <sub>6</sub>                                         | 385.5 | 148.30  | 33000.00  | 0.580 | 0.475 |
| Al <sub>0.01</sub> Ge <sub>0.99</sub> Te                                                      | 373   | 43.93   | 539286.00 | 6.273 | 0.062 |
| Cu <sub>1.97</sub> In <sub>0.03</sub> Se                                                      | 295   | 95.60   | 107383.00 | 0.862 | 0.336 |
| Bi <sub>1.2</sub> Sb <sub>0.8</sub> Se <sub>2.76</sub> Cl <sub>0.24</sub>                     | 300   | -89.00  | 39724.00  | 0.720 | 0.131 |
| Mo <sub>3</sub> Sb <sub>7</sub> l <sub>1.5</sub>                                              | 523   | 21.10   | 422000.00 | 5.130 | 0.019 |
| LaCo <sub>0.95</sub> Ni <sub>0.05</sub> O <sub>3</sub>                                        | 300   | 302.40  | 1496.00   | 0.551 | 0.072 |
| Cu <sub>26</sub> Ti <sub>2</sub> Sb <sub>3</sub> Ge <sub>3</sub> S <sub>32</sub>              | 596   | 123.20  | 89063.00  | 1.583 | 0.493 |
| FeNb <sub>0.92</sub> Hf <sub>0.08</sub> Sb                                                    | 500   | 167.00  | 214728.00 | 6.840 | 0.438 |
| CrO <sub>0.09</sub> N <sub>0.9</sub>                                                          | 200   | -52.30  | 29773.00  | 4.594 | 0.004 |
| Ge <sub>0.58</sub> Sb <sub>0.22</sub> Te <sub>0.8</sub> (AgSnSe <sub>2</sub> ) <sub>0.2</sub> | 623   | 208.10  | 35500.00  | 0.710 | 1.366 |
| CaZn <sub>0.4</sub> Ag <sub>0.2</sub> Sb                                                      | 573   | 111.30  | 57522.00  | 1.010 | 0.404 |
| Rb <sub>2</sub> Bi <sub>8</sub> Se <sub>12.961</sub>                                          | 428   | -218.50 | 8480.00   | 0.587 | 0.295 |
| Tl <sub>9.0</sub> Bi <sub>0.99</sub> Te <sub>6.0</sub>                                        | 385   | 209.00  | 18400.00  | 0.455 | 0.680 |
| Ge <sub>0.55</sub> Pb <sub>0.45</sub> Te <sub>0.3</sub> Se <sub>0.7</sub>                     | 569   | 299.38  | 4911.00   | 0.636 | 0.484 |
| GeSe <sub>0.6</sub> Te <sub>0.4</sub>                                                         | 776   | 132.78  | 101866.00 | 2.125 | 0.656 |
| Cu <sub>2</sub> ZnSn <sub>0.95</sub> Ag <sub>0.05</sub> Se <sub>4</sub>                       | 473   | 50.70   | 198718.00 | 3.117 | 0.078 |
| Li <sub>0.03</sub> Cu <sub>1.8</sub> Bi <sub>0.05</sub> Se                                    | 761   | 135.50  | 45455.00  | 0.964 | 0.659 |
| (Sn <sub>0.985</sub> In <sub>0.015</sub> Te) <sub>0.9</sub> (AgCl) <sub>0.1</sub>             | 623   | 96.67   | 231461.00 | 3.000 | 0.449 |
| Rb <sub>2</sub> Bi <sub>8</sub> Se <sub>12.9909</sub> Cl <sub>0.0091</sub>                    | 823   | -191.20 | 8750.00   | 0.530 | 0.497 |
| Mg <sub>3.5</sub> Gd <sub>0.03</sub> Sb <sub>2</sub>                                          | 300   | -197.50 | 19493.00  | 1.082 | 0.211 |
| FeNb <sub>0.86</sub> Hf <sub>0.14</sub> Sb                                                    | 300   | 84.47   | 668992.00 | 7.339 | 0.195 |
| Nd <sub>3</sub> Te <sub>4</sub>                                                               | 1073  | -78.10  | 144600.00 | 3.022 | 0.313 |
| In <sub>0.005</sub> Pb <sub>0.995</sub> Te <sub>0.994</sub> l <sub>0.006</sub>                | 533   | -164.00 | 55300.00  | 1.593 | 0.498 |
| Cu <sub>2</sub> ZnSnSe <sub>4</sub>                                                           | 373   | 116.62  | 19531.00  | 3.988 | 0.025 |
| Ag <sub>1.2</sub> Sb <sub>0.8</sub> Pb <sub>14.9</sub> Te <sub>22.7</sub>                     | 473   | 344.00  | 1547.00   | 1.050 | 0.082 |
| Ag <sub>0.94</sub> CuSe                                                                       | 625   | 212.10  | 17589.00  | 0.593 | 0.834 |
| AgBi <sub>0.95</sub> Pb <sub>0.05</sub> Se <sub>2.12</sub>                                    | 350   | 334.00  | 4265.00   | 0.588 | 0.283 |

|                                                                                               |      |         |           |       |       |
|-----------------------------------------------------------------------------------------------|------|---------|-----------|-------|-------|
| In <sub>0.01</sub> Pb <sub>0.99</sub> Te <sub>0.998</sub> l <sub>0.002</sub>                  | 637  | -251.00 | 17000.00  | 1.356 | 0.503 |
| Cu <sub>3</sub> P <sub>0.6</sub> Ge <sub>0.4</sub> S <sub>4</sub>                             | 500  | 82.00   | 73200.00  | 1.520 | 0.162 |
| SnTe <sub>0.25</sub> AgSbSe <sub>2</sub>                                                      | 600  | 132.20  | 77181.00  | 1.608 | 0.503 |
| Tl <sub>8.99</sub> Sb <sub>1.01</sub> Te <sub>6</sub>                                         | 326  | 107.00  | 53300.00  | 0.710 | 0.280 |
| In <sub>0.005</sub> Pb <sub>0.995</sub> Te <sub>0.996</sub> l <sub>0.004</sub>                | 481  | -207.40 | 37350.00  | 1.636 | 0.472 |
| Cu <sub>1.95</sub> In <sub>0.05</sub> Se                                                      | 870  | 328.71  | 2023.00   | 1.938 | 0.194 |
| (SnTe) <sub>0.96</sub> (CuSbTe <sub>2</sub> ) <sub>0.04</sub>                                 | 818  | 164.20  | 93249.00  | 2.137 | 0.963 |
| Bi <sub>0.8</sub> Pb <sub>0.1</sub> Yb <sub>0.1</sub> CuSeO                                   | 543  | 121.71  | 20000.00  | 0.629 | 0.256 |
| (PbTe) <sub>0.15</sub> (Ag <sub>2</sub> Te) <sub>0.85</sub>                                   | 350  | -104.29 | 79473.00  | 0.850 | 0.549 |
| AgCuTe <sub>0.6</sub> Se <sub>0.4</sub>                                                       | 422  | 217.50  | 8835.00   | 0.305 | 0.671 |
| GeSe <sub>0.75</sub> Te <sub>0.25</sub>                                                       | 678  | 39.05   | 72388.00  | 1.685 | 0.044 |
| Cu <sub>2.9</sub> Ag <sub>0.1</sub> ErTe <sub>3</sub>                                         | 700  | 85.00   | 72000.00  | 0.680 | 0.536 |
| Ag <sub>2</sub> Te                                                                            | 550  | -119.70 | 46550.00  | 0.601 | 0.615 |
| Ca <sub>0.15</sub> BaGd <sub>1.85</sub> NiO <sub>5</sub>                                      | 1000 | 173.53  | 425.07    | 1.664 | 0.008 |
| Bi <sub>0.98</sub> Pb <sub>0.02</sub> CuSeO                                                   | 50   | 39.69   | 120913.00 | 3.911 | 0.002 |
| Cu <sub>1.95</sub> S <sub>0.5</sub> Se <sub>0.5</sub>                                         | 375  | 71.92   | 31634.00  | 1.009 | 0.061 |
| BiSb(Se <sub>0.96</sub> Br <sub>0.04</sub> ) <sub>3</sub>                                     | 500  | -169.00 | 16436.00  | 0.550 | 0.427 |
| Mg <sub>3.5</sub> Gd <sub>0.03</sub> Sb <sub>1.97</sub> Te <sub>0.03</sub>                    | 400  | -223.93 | 19198.00  | 0.874 | 0.441 |
| Ba <sub>8.02</sub> Cu <sub>5.04</sub> Si <sub>6</sub> Ge <sub>34.93</sub>                     | 766  | -134.33 | 44660.00  | 1.371 | 0.450 |
| Cu <sub>3</sub> Sb <sub>0.9</sub> Ge <sub>0.1</sub> S <sub>4</sub>                            | 373  | 172.20  | 25800.00  | 1.703 | 0.168 |
| Ba <sub>0.44</sub> Co <sub>4</sub> Sb <sub>11.90</sub>                                        | 300  | -68     | 637800.00 | 2.800 | 0.100 |
| FeNb <sub>0.92</sub> Zr <sub>0.08</sub> Sb                                                    | 500  | 174.50  | 196124.00 | 9.525 | 0.313 |
| Mg <sub>2</sub> Zn <sub>0.96</sub> Sb <sub>2</sub>                                            | 773  | 160.26  | 20921.00  | 0.961 | 0.432 |
| Ge <sub>0.55</sub> Pb <sub>0.45</sub> Te <sub>0.2</sub> Se <sub>0.8</sub>                     | 300  | 384.38  | 2850.00   | 0.805 | 0.010 |
| Li <sub>0.01</sub> Cu <sub>1.85</sub> Se                                                      | 603  | 45.71   | 290385.00 | 3.546 | 0.103 |
| Dy <sub>0.02</sub> Co <sub>4</sub> Sb <sub>12</sub>                                           | 800  | -131    | 32300.00  | 3.900 | 0.100 |
| Cu <sub>2</sub> ZnSn <sub>0.95</sub> Ag <sub>0.05</sub> Se <sub>4</sub>                       | 673  | 77.00   | 133700.00 | 2.134 | 0.255 |
| Ge <sub>0.58</sub> Sb <sub>0.22</sub> Te <sub>0.8</sub> (AgSnSe <sub>2</sub> ) <sub>0.2</sub> | 323  | 151.60  | 43900.00  | 0.740 | 0.440 |
| Nb <sub>0.85</sub> Ta <sub>0.15</sub> CoSn <sub>0.9</sub> Sb <sub>0.1</sub>                   | 338  | -103.27 | 125957.00 | 4.979 | 0.091 |
| (Bi <sub>0.23</sub> Sb <sub>0.77</sub> ) <sub>2</sub> Te <sub>3</sub>                         | 300  | 229.00  | 54942.00  | 0.885 | 0.977 |
| CuAgTe <sub>0.6</sub> Se <sub>0.4</sub>                                                       | 422  | 231.52  | 6783.00   | 0.348 | 0.441 |
| Sn <sub>0.965</sub> Pb <sub>0.01</sub> Cd <sub>0.025</sub> Se                                 | 423  | 347.70  | 3587.00   | 0.696 | 0.264 |
| Co <sub>4</sub> Sb <sub>11.95</sub> Te <sub>0.05</sub>                                        | 850  | -218    | 22200.00  | 4.600 | 0.200 |

|                                                                               |      |         |           |       |       |
|-------------------------------------------------------------------------------|------|---------|-----------|-------|-------|
| Nb <sub>0.9</sub> Ta <sub>0.1</sub> CoSn <sub>0.9</sub> Sb <sub>0.1</sub>     | 628  | -139.05 | 112199.00 | 4.536 | 0.300 |
| Hf <sub>0.9</sub> Ti <sub>0.1</sub> CoSb <sub>0.8</sub> Sn <sub>0.2</sub>     | 1088 | 212.00  | 55035.00  | 3.310 | 0.819 |
| Cu <sub>2.1</sub> Se                                                          | 770  | 126.73  | 104054.00 | 2.025 | 0.635 |
| Cu <sub>3.0</sub> SbSe <sub>4</sub>                                           | 473  | 409.00  | 3227.00   | 1.370 | 0.186 |
| Ba <sub>8</sub> Cu <sub>5</sub> Si <sub>25</sub> Ge <sub>16</sub>             | 760  | -111.00 | 68550.00  | 1.924 | 0.332 |
| Cu <sub>2</sub> Se <sub>0.5</sub> S <sub>0.5</sub>                            | 426  | 52.97   | 148286.00 | 1.616 | 0.110 |
| Cu <sub>3</sub> SbSe <sub>4</sub>                                             | 323  | 387.00  | 2310.00   | 2.796 | 0.040 |
| CaZn <sub>0.4</sub> Ag <sub>0.2</sub> Sb                                      | 472  | 93.36   | 77844.00  | 1.143 | 0.280 |
| Ag <sub>3.4</sub> Mo <sub>9</sub> Se <sub>11</sub>                            | 350  | 71.00   | 58000.00  | 1.260 | 0.080 |
| K <sub>0.995</sub> Ba <sub>0.005</sub> GaSb <sub>4</sub>                      | 602  | -292.86 | 7053.00   | 0.556 | 0.655 |
| La <sub>2.0</sub> Co <sub>4</sub> Sb <sub>12</sub>                            | 373  | -15.40  | 358974.00 | 2.520 | 0.013 |
| Ag <sub>3.5</sub> Mo <sub>9</sub> Se <sub>11</sub>                            | 645  | 123.70  | 36400.00  | 1.124 | 0.320 |
| Ca <sub>3</sub> AlSb <sub>3</sub>                                             | 722  | 419.00  | 500.00    | 0.670 | 0.091 |
| Cu <sub>3</sub> ErTe <sub>3</sub>                                             | 400  | 48.60   | 244890.00 | 2.380 | 0.097 |
| Mg <sub>3.5</sub> Ho <sub>0.01</sub> Sb <sub>1.97</sub> Te <sub>0.03</sub>    | 600  | -281.91 | 12875.00  | 0.789 | 0.778 |
| Cu <sub>2.025</sub> Cd <sub>0.975</sub> SnSe <sub>4</sub>                     | 350  | 176.30  | 5862.00   | 2.236 | 0.029 |
| Cu <sub>1.55</sub> S                                                          | 350  | 13.60   | 536538.00 | 3.908 | 0.009 |
| (Cu <sub>0.004</sub> Pb <sub>0.996</sub> Te)(MnTe) <sub>0.03</sub>            | 773  | -173.68 | 60276.00  | 1.443 | 0.974 |
| Ag <sub>0.4</sub> Sb <sub>1.1</sub> Pb <sub>19.6</sub> Te <sub>18.8</sub>     | 423  | -1.00   | 16247.00  | 1.555 | 0.000 |
| YbCd <sub>1.8</sub> Zn <sub>0.2</sub> Sb <sub>2</sub>                         | 350  | 133.74  | 64873.00  | 1.844 | 0.220 |
| Y <sub>0.2</sub> Bi <sub>1.8</sub> Te <sub>3</sub>                            | 423  | -147.40 | 72086.00  | 0.580 | 1.142 |
| NbCo <sub>0.92</sub> Ni <sub>0.08</sub> Sn                                    | 704  | -116.47 | 111395.00 | 6.774 | 0.157 |
| Cu <sub>1.99</sub> In <sub>0.01</sub> Se                                      | 870  | 245.50  | 20970.00  | 0.775 | 1.445 |
| Ta <sub>0.96</sub> Ti <sub>0.04</sub> FeSb                                    | 570  | 245.60  | 67300.00  | 5.195 | 0.450 |
| Mg <sub>2</sub> Zn <sub>1.02</sub> Sb <sub>2</sub>                            | 673  | 88.74   | 7152.00   | 1.001 | 0.038 |
| Tl <sub>9.0</sub> Sb <sub>0.98</sub> Te <sub>6</sub>                          | 503  | 177.00  | 27100.00  | 0.537 | 0.795 |
| EuZn <sub>2</sub> Sb <sub>2</sub>                                             | 650  | 181.20  | 59000.00  | 1.417 | 0.889 |
| GeSe <sub>0.65</sub> Te <sub>0.35</sub>                                       | 728  | 112.47  | 93657.00  | 1.981 | 0.435 |
| (GeTe) <sub>0.7</sub> (AgSnSe <sub>2</sub> ) <sub>0.3</sub>                   | 523  | 44.10   | 61935.00  | 1.385 | 0.045 |
| Nb <sub>0.85</sub> Ta <sub>0.15</sub> CoSn <sub>0.9</sub> Sb <sub>0.1</sub>   | 728  | -154.10 | 93617.00  | 4.263 | 0.380 |
| Ta <sub>0.96</sub> Ti <sub>0.04</sub> FeSb                                    | 670  | 262.70  | 56925.00  | 4.820 | 0.546 |
| Ba <sub>8.01</sub> Ga <sub>15.89</sub> Zn <sub>0.006</sub> Sn <sub>30.1</sub> | 420  | 382.80  | 11985.00  | 0.877 | 0.841 |
| (GeTe) <sub>0.9</sub> (AgSnSe <sub>2</sub> ) <sub>0.1</sub>                   | 623  | 63.35   | 236129.00 | 3.192 | 0.185 |



|                                                                                                          |      |         |           |        |       |
|----------------------------------------------------------------------------------------------------------|------|---------|-----------|--------|-------|
| Rb <sub>7.88</sub> Au <sub>2.47</sub> Ge <sub>43.53</sub>                                                | 300  | -12.61  | 551.40    | 2.077  | 0.000 |
| Ge <sub>0.99</sub> Mn <sub>0.01</sub> Te                                                                 | 498  | 63.23   | 300000.00 | 4.406  | 0.136 |
| Cu <sub>7</sub> P(S <sub>0.75</sub> Se <sub>0.25</sub> ) <sub>6</sub>                                    | 325  | 402.96  | 16.44     | 0.239  | 0.004 |
| Sm <sub>0.2</sub> Bi <sub>1.8</sub> Te <sub>3</sub>                                                      | 373  | -142.60 | 74600.00  | 0.734  | 0.766 |
| Ti <sub>0.95</sub> Al <sub>0.05</sub> O <sub>2</sub>                                                     | 296  | -238.95 | 2104.00   | 5.670  | 0.006 |
| Bi <sub>0.95</sub> Ba <sub>0.05</sub> CuSeO                                                              | 825  | 289.50  | 3930.00   | 0.600  | 0.453 |
| (Cu <sub>3</sub> SnS <sub>4</sub> ) <sub>0.915</sub> (Ga <sub>2</sub> Te <sub>3</sub> ) <sub>0.085</sub> | 554  | 84.85   | 131670.00 | 3.181  | 0.165 |
| Ba <sub>0.03</sub> Co <sub>4</sub> Sb <sub>12</sub>                                                      | 800  | -161.40 | 37234.00  | 3.830  | 0.204 |
| Sr <sub>0.16</sub> Yb <sub>0.03</sub> Co <sub>4</sub> Sb <sub>11.82</sub>                                | 300  | -116.00 | 296818.00 | 4.050  | 0.296 |
| (SnTe) <sub>10</sub> Sb <sub>2</sub> Te <sub>3</sub>                                                     | 723  | 177.90  | 77080.00  | 1.660  | 1.062 |
| Yb <sub>13</sub> CaMnSb <sub>11</sub>                                                                    | 773  | 153.83  | 25000.00  | 0.877  | 0.468 |
| FeNb <sub>0.88</sub> Ti <sub>0.12</sub> Sb                                                               | 700  | 182.00  | 130000.00 | 6.500  | 0.464 |
| Zn <sub>0.85</sub> Cd <sub>0.15</sub> Sc <sub>0.02</sub> O <sub>1.03</sub>                               | 473  | -70.00  | 20000.00  | 5.750  | 0.008 |
| Ba <sub>2</sub> CoRuO <sub>6</sub>                                                                       | 518  | 17.00   | 223000.00 | 1.455  | 0.023 |
| TaFeSb                                                                                                   | 870  | 114.30  | 4155.00   | 4.644  | 0.010 |
| Bi <sub>0.96</sub> Ag <sub>0.04</sub> CuSeO                                                              | 623  | 288.40  | 1947.00   | 0.520  | 0.194 |
| Yb <sub>7</sub> Ca <sub>6</sub> BaMgSb <sub>11</sub>                                                     | 300  | 59.94   | 10942.00  | 0.528  | 0.022 |
| (Sn <sub>0.985</sub> In <sub>0.015</sub> Te) <sub>0.95</sub> (AgCl) <sub>0.05</sub>                      | 523  | 76.64   | 371910.00 | 4.697  | 0.243 |
| (Cu <sub>0.002</sub> Pb <sub>0.998</sub> Te)(MnTe) <sub>0.03</sub>                                       | 423  | -207.72 | 62069.00  | 1.608  | 0.705 |
| Cu <sub>0.99</sub> Pd <sub>0.01</sub> FeS <sub>2</sub>                                                   | 200  | -345.00 | 5425.00   | 12.840 | 0.010 |
| Cu <sub>11.7</sub> Gd <sub>0.3</sub> Sb <sub>4</sub> S <sub>13</sub>                                     | 723  | 144.10  | 73220.00  | 1.330  | 0.833 |
| Bi <sub>1.9</sub> Nb <sub>0.1</sub> Te <sub>3</sub>                                                      | 366  | -106.30 | 64902.00  | 0.803  | 0.334 |
| AgBiSe <sub>2.0</sub>                                                                                    | 625  | -236.00 | 4000.00   | 0.443  | 0.314 |
| CuAgTe <sub>0.5</sub> Se <sub>0.5</sub>                                                                  | 349  | 143.09  | 9689.00   | 0.463  | 0.150 |
| Cu <sub>1.85</sub> Se                                                                                    | 502  | 32.99   | 348077.00 | 3.939  | 0.048 |
| Ag <sub>2.0</sub> Se <sub>0.5</sub> Te <sub>0.5</sub>                                                    | 345  | -97.84  | 65000.00  | 0.660  | 0.325 |
| FeNb <sub>0.96</sub> Ti <sub>0.04</sub> Sb                                                               | 500  | 206.00  | 113000.00 | 10.310 | 0.233 |
| ZrNiPb <sub>0.9</sub> Sn <sub>0.8</sub> Bi <sub>0.02</sub>                                               | 771  | -181.00 | 133120.00 | 5.626  | 0.598 |
| Ca <sub>0.15</sub> BaGd <sub>1.85</sub> NiO <sub>5</sub>                                                 | 1179 | 205.88  | 500.47    | 1.601  | 0.016 |
| Cu <sub>1.99</sub> In <sub>0.01</sub> Se                                                                 | 473  | 130.00  | 55405.00  | 0.900  | 0.500 |
| Ag <sub>0.97</sub> Cr <sub>0.95</sub> Bi <sub>0.05</sub> Se <sub>2</sub>                                 | 753  | 188.35  | 6601.00   | 0.465  | 0.380 |
| Cu <sub>7</sub> P(S <sub>0.25</sub> Se <sub>0.75</sub> ) <sub>6</sub>                                    | 523  | 221.40  | 4670.00   | 0.312  | 0.384 |
| Co <sub>0.99</sub> Ni <sub>0.01</sub> GeTe                                                               | 327  | -115.11 | 57181.00  | 6.955  | 0.036 |

|                                                                                |     |         |           |        |       |
|--------------------------------------------------------------------------------|-----|---------|-----------|--------|-------|
| Eu <sub>14</sub> MgBi <sub>11</sub>                                            | 326 | 27.95   | 57031.00  | 1.512  | 0.010 |
| (SnTe) <sub>15</sub> Sb <sub>2</sub> Te <sub>3</sub>                           | 623 | 131.03  | 124937.00 | 2.390  | 0.559 |
| (Sn <sub>0.8</sub> Ge <sub>0.2</sub> ) <sub>0.85</sub> Mn <sub>0.15</sub> Te   | 373 | 67.70   | 179000.00 | 1.975  | 0.157 |
| Ca <sub>5</sub> In <sub>1.9</sub> Zn <sub>0.1</sub> Sb <sub>6</sub>            | 422 | 144.00  | 20460.00  | 1.108  | 0.150 |
| In <sub>0.005</sub> Pb <sub>0.995</sub> Te <sub>0.998</sub> l <sub>0.002</sub> | 378 | -222.00 | 33594.00  | 1.644  | 0.382 |
| Cu <sub>2.025</sub> Cd <sub>0.975</sub> SnSe <sub>4</sub>                      | 700 | 204.20  | 6259.00   | 0.750  | 0.244 |
| Li <sub>0.03</sub> Cu <sub>1.81</sub> Bi <sub>0.04</sub> Se                    | 401 | 53.75   | 68966.00  | 1.420  | 0.056 |
| TaFeSb                                                                         | 970 | 117.86  | 5817.00   | 4.457  | 0.018 |
| (SnTe) <sub>0.86</sub> (CuSbTe <sub>2</sub> ) <sub>0.14</sub>                  | 524 | 84.30   | 161100.00 | 2.810  | 0.213 |
| Cu <sub>3</sub> Sb <sub>0.98</sub> Ge <sub>0.02</sub> S <sub>4</sub>           | 323 | 192.00  | 22857.00  | 3.428  | 0.079 |
| Ge <sub>0.9</sub> Mn <sub>0.05</sub> Sb <sub>0.05</sub> Te                     | 298 | 75.50   | 162900.00 | 2.941  | 0.094 |
| CuGa <sub>0.99</sub> Mn <sub>0.01</sub> Te <sub>2</sub>                        | 868 | 231.00  | 29304.00  | 1.645  | 0.830 |
| Ge <sub>0.98</sub> Mn <sub>0.02</sub> Te                                       | 498 | 72.90   | 273196.00 | 4.000  | 0.181 |
| Cr <sub>1.99</sub> Mn <sub>0.01</sub> Ge <sub>2</sub> Te <sub>6</sub>          | 515 | 332.00  | 2734.38   | 0.716  | 0.217 |
| Li <sub>1.1</sub> Co <sub>0.85</sub> Ni <sub>0.15</sub> O <sub>2</sub>         | 923 | 298.00  | 483.69    | 1.607  | 0.025 |
| (PbTe)(MnTe) <sub>0.03</sub>                                                   | 623 | -255.26 | 25379.00  | 1.160  | 0.888 |
| AgBi <sub>0.9</sub> Sb <sub>0.1</sub> Se <sub>2</sub>                          | 525 | 429.69  | 362.60    | 0.419  | 0.071 |
| (Sn <sub>0.8</sub> Ge <sub>0.2</sub> ) <sub>0.94</sub> Mn <sub>0.06</sub> Te   | 773 | 127.20  | 113830.00 | 2.053  | 0.693 |
| Mg <sub>3.07</sub> Sb <sub>1.5</sub> Bi <sub>0.48</sub> Se <sub>0.02</sub>     | 600 | -298.48 | 12053.00  | 0.671  | 0.960 |
| Ag <sub>0.01</sub> Cr <sub>1.99</sub> Se <sub>3</sub>                          | 725 | 159.29  | 22786.00  | 1.750  | 0.240 |
| Cu <sub>3</sub> Sb <sub>0.85</sub> Ge <sub>0.15</sub> S <sub>4</sub>           | 573 | 184.30  | 31350.00  | 1.178  | 0.518 |
| Cu <sub>3.0</sub> SbSe <sub>4</sub>                                            | 348 | 498.00  | 2302.00   | 2.150  | 0.092 |
| Ag <sub>2</sub> Se <sub>0.98</sub>                                             | 307 | -131.00 | 143400.00 | 1.074  | 0.711 |
| Sn <sub>0.99</sub> Ce <sub>0.01</sub> Te                                       | 723 | 123.00  | 107600.00 | 2.600  | 0.453 |
| Li <sub>1.01</sub> Co <sub>0.85</sub> Ni <sub>0.15</sub> O <sub>2</sub>        | 323 | 244.50  | 0.04      | 0.316  | 0.000 |
| Eu(Zn <sub>0.7</sub> Cd <sub>0.3</sub> ) <sub>2</sub> Sb <sub>2</sub>          | 600 | 214.80  | 33333.00  | 1.160  | 0.795 |
| Sr <sub>0.21</sub> Co <sub>4</sub> Sb <sub>12.25</sub>                         | 400 | -147.00 | 195454.00 | 4.290  | 0.394 |
| Mg <sub>3</sub> Sb <sub>1.9</sub> Bi <sub>0.1</sub>                            | 750 | 366.20  | 1888.00   | 0.600  | 0.327 |
| Cu <sub>1.99</sub> S <sub>0.5</sub> Se <sub>0.5</sub>                          | 300 | 153.94  | 3564.00   | 0.413  | 0.061 |
| Ag <sub>2.0</sub> Se <sub>0.9</sub> Te <sub>0.1</sub>                          | 390 | -132.00 | 111376.00 | 0.944  | 0.802 |
| BaGd <sub>2</sub> NiO <sub>5</sub>                                             | 750 | 427.20  | 20.95     | 1.656  | 0.002 |
| AgSb <sub>0.99</sub> Mn <sub>0.01</sub> Te <sub>2</sub>                        | 341 | 85.57   | 49067.00  | 0.963  | 0.127 |
| FeNb <sub>0.88</sub> Ti <sub>0.12</sub> Sb                                     | 300 | 103.00  | 430000.00 | 11.300 | 0.121 |

|                                                                           |     |         |           |       |       |
|---------------------------------------------------------------------------|-----|---------|-----------|-------|-------|
| GeSe <sub>0.8</sub> Te <sub>0.2</sub>                                     | 630 | 35.94   | 66418.00  | 1.762 | 0.031 |
| Ca <sub>0.25</sub> BaGd <sub>1.75</sub> NiO <sub>5</sub>                  | 687 | 155.15  | 212.30    | 1.327 | 0.003 |
| Cu <sub>2</sub> Se                                                        | 374 | 42.57   | 320270.00 | 2.000 | 0.109 |
| CrO <sub>0.09</sub> N <sub>0.9</sub>                                      | 150 | -45.20  | 24147.00  | 4.194 | 0.002 |
| Nd <sub>2.86</sub> Te <sub>4</sub>                                        | 373 | -42.00  | 151400.00 | 2.066 | 0.048 |
| Ba <sub>0.97</sub> K <sub>0.03</sub> Zn <sub>2</sub> As <sub>2</sub>      | 723 | 101.85  | 58182.00  | 2.093 | 0.208 |
| Ca <sub>1.58</sub> Yb <sub>3.42</sub> Al <sub>2</sub> Sb <sub>6</sub>     | 610 | 46.69   | 21964.00  | 3.442 | 0.008 |
| Sn <sub>0.96</sub> Pb <sub>0.01</sub> Cd <sub>0.035</sub> Se              | 573 | 390.67  | 2698.00   | 0.415 | 0.569 |
| K <sub>0.975</sub> Ba <sub>0.025</sub> GaSb <sub>4</sub>                  | 324 | -134.70 | 23542.00  | 1.125 | 0.123 |
| Gd <sub>2</sub> Se <sub>2.98</sub>                                        | 550 | -167.20 | 28600.00  | 1.506 | 0.292 |
| NbCo <sub>0.94</sub> Ni <sub>0.06</sub> Sn                                | 382 | -56.18  | 188941.00 | 9.536 | 0.024 |
| LiCo <sub>0.92</sub> Ni <sub>0.08</sub> O <sub>2</sub>                    | 423 | 302.07  | 0.01      | 1.409 | 0.000 |
| Ca <sub>5</sub> Ga <sub>1.95</sub> Zn <sub>0.05</sub> Sb <sub>6</sub>     | 773 | 170.93  | 14941.00  | 0.905 | 0.373 |
| Tl <sub>9.0</sub> Bi <sub>0.98</sub> Te <sub>6.0</sub>                    | 443 | 217.40  | 17545.00  | 0.420 | 0.875 |
| Cu <sub>11.5</sub> Gd <sub>0.5</sub> Sb <sub>4</sub> S <sub>13</sub>      | 625 | 122.64  | 80821.00  | 1.445 | 0.526 |
| PbTe                                                                      | 428 | -269.84 | 24079.00  | 1.580 | 0.482 |
| Yb <sub>9</sub> Ca <sub>4</sub> BaMgSb <sub>11</sub>                      | 300 | 59.00   | 17350.00  | 0.503 | 0.036 |
| Bi <sub>0.88</sub> Pb <sub>0.06</sub> Yb <sub>0.06</sub> CuSeO            | 640 | 167.11  | 18641.00  | 0.484 | 0.688 |
| Ge <sub>0.87</sub> Mn <sub>0.05</sub> Sb <sub>0.08</sub> Te               | 498 | 163.60  | 85600.00  | 1.665 | 0.700 |
| (SnTe) <sub>0.92</sub> (CuSbTe <sub>2</sub> ) <sub>0.08</sub>             | 526 | 74.00   | 195470.00 | 3.044 | 0.185 |
| Ba <sub>0.15</sub> Yb <sub>0.01</sub> Co <sub>4</sub> Sb <sub>12.08</sub> | 300 | -125    | 178900.00 | 3.000 | 0.200 |
| ZrNiPb <sub>0.9</sub> Sn <sub>0.8</sub> Bi <sub>0.02</sub>                | 871 | -183.60 | 128800.00 | 5.903 | 0.641 |
| CuAgTe <sub>0.5</sub> Se <sub>0.5</sub>                                   | 383 | 129.79  | 8910.00   | 0.391 | 0.147 |
| ZrNiPb <sub>0.96</sub> Sn <sub>0.2</sub> Bi <sub>0.02</sub>               | 871 | -152.20 | 210000.00 | 6.260 | 0.677 |
| Cr <sub>1.99</sub> Mn <sub>0.01</sub> Ge <sub>2</sub> Te <sub>6</sub>     | 416 | 346.90  | 1609.38   | 0.763 | 0.106 |
| Bi <sub>0.875</sub> Ba <sub>0.125</sub> CuSeO                             | 725 | 212.82  | 9471.00   | 0.718 | 0.480 |
| Eu <sub>14</sub> MgBi <sub>11</sub>                                       | 914 | 99.32   | 47700.00  | 1.630 | 0.267 |
| Ge <sub>0.95</sub> Mn <sub>0.05</sub> Te                                  | 398 | 56.77   | 306186.00 | 4.289 | 0.092 |
| Mg <sub>2.9875</sub> Na <sub>0.0125</sub> Sb <sub>2</sub>                 | 373 | 107.80  | 26523.00  | 1.563 | 0.074 |
| SnTe <sub>0.15</sub> AgSbSe <sub>2</sub>                                  | 700 | 140.40  | 76870.00  | 1.710 | 0.626 |
| AgBiSe <sub>2.0</sub>                                                     | 375 | -166.00 | 8310.00   | 0.670 | 0.128 |
| Bi <sub>0.92</sub> Ag <sub>0.08</sub> CuSeO                               | 573 | 293.40  | 2020.00   | 0.425 | 0.234 |
| Ge <sub>0.89</sub> In <sub>0.05</sub> Pb <sub>0.06</sub> Te               | 425 | 170.76  | 52273.00  | 1.213 | 0.534 |

|                                                                                 |     |         |           |       |       |
|---------------------------------------------------------------------------------|-----|---------|-----------|-------|-------|
| Ag <sub>0.97</sub> CuSe                                                         | 468 | 89.17   | 43509.00  | 1.670 | 0.070 |
| Mg <sub>3.5</sub> Ho <sub>0.02</sub> Sb <sub>1.97</sub> Te <sub>0.03</sub>      | 600 | -268.09 | 16496.00  | 0.824 | 0.863 |
| Cu <sub>1.6</sub> S                                                             | 300 | 8.45    | 387019.00 | 3.408 | 0.002 |
| Cu <sub>5</sub> Sn <sub>2</sub> S <sub>7</sub>                                  | 678 | 75.00   | 139506.00 | 2.888 | 0.184 |
| La <sub>0.25</sub> Ca <sub>0.75</sub> TiO <sub>3</sub>                          | 321 | -48.00  | 245200.00 | 4.063 | 0.045 |
| FeNb <sub>0.92</sub> Ti <sub>0.08</sub> Sb                                      | 900 | 240.00  | 79000.00  | 6.300 | 0.650 |
| Ca <sub>10</sub> InSb <sub>9</sub>                                              | 772 | 209.00  | 4250.00   | 0.720 | 0.199 |
| Sn <sub>1.03</sub> Se <sub>0.12</sub> Te <sub>0.87</sub> Br <sub>0.01</sub>     | 523 | 56.17   | 324561.00 | 3.201 | 0.143 |
| Rb <sub>2</sub> Bi <sub>8</sub> Se <sub>12.9415</sub>                           | 724 | -213.60 | 7841.00   | 0.590 | 0.439 |
| La <sub>0.15</sub> Ca <sub>0.85</sub> TiO <sub>3</sub>                          | 538 | -107.00 | 73120.00  | 3.496 | 0.135 |
| AgBiSe <sub>2.0</sub>                                                           | 528 | -213.70 | 3678.00   | 0.574 | 0.155 |
| Zn <sub>0.85</sub> Cd <sub>0.15</sub> Sc <sub>0.02</sub> O <sub>1.03</sub>      | 973 | -121.00 | 15400.00  | 3.330 | 0.066 |
| Ba <sub>7.97</sub> Ga <sub>15.95</sub> Sn <sub>30.09</sub>                      | 500 | 360.56  | 10558.00  | 0.901 | 0.762 |
| BiSbSe <sub>2.88</sub> Cl <sub>0.12</sub>                                       | 600 | -264.00 | 4390.00   | 0.440 | 0.417 |
| Yb <sub>8</sub> Ca <sub>5</sub> BaMgSb <sub>11</sub>                            | 900 | 195.70  | 12400.00  | 0.611 | 0.700 |
| Cu <sub>3</sub> P <sub>0.9</sub> Ge <sub>0.1</sub> S <sub>4</sub>               | 350 | 127.00  | 7375.00   | 0.792 | 0.053 |
| BaBiTe <sub>2.95</sub> Se <sub>0.05</sub>                                       | 525 | -191.80 | 8000.00   | 0.409 | 0.365 |
| GeSe <sub>0.5</sub> Te <sub>0.5</sub>                                           | 630 | 102.10  | 157222.00 | 2.034 | 0.508 |
| Ag <sub>0.02</sub> Cu <sub>1.955</sub> S <sub>0.5</sub> Se <sub>0.5</sub>       | 375 | 151.00  | 5809.00   | 0.633 | 0.079 |
| Ge <sub>0.98</sub> Mn <sub>0.01</sub> Sb <sub>0.01</sub> Te                     | 773 | 147.74  | 143300.00 | 2.674 | 0.904 |
| YbCd <sub>1.9</sub> Zn <sub>0.1</sub> Sb <sub>2</sub>                           | 450 | 166.60  | 51250.00  | 1.645 | 0.389 |
| Ca <sub>1.58</sub> Yb <sub>3.42</sub> Al <sub>2</sub> Sb <sub>6</sub>           | 420 | 29.00   | 23333.00  | 3.825 | 0.002 |
| Al <sub>0.03</sub> Ge <sub>0.97</sub> Te                                        | 473 | 69.11   | 375000.00 | 4.949 | 0.171 |
| (PbTe)(MnTe) <sub>0.03</sub>                                                    | 523 | -246.14 | 31862.00  | 1.323 | 0.763 |
| Cu <sub>26</sub> V <sub>2</sub> Ge <sub>4</sub> Sb <sub>2</sub> S <sub>32</sub> | 309 | 66.51   | 175410.00 | 2.571 | 0.093 |
| Rb <sub>2</sub> Bi <sub>8</sub> Se <sub>12.9935</sub>                           | 823 | -219.60 | 7386.00   | 0.559 | 0.524 |
| Ti <sub>0.99</sub> Mn <sub>0.01</sub> NiSn <sub>0.99</sub> Sb <sub>0.01</sub>   | 697 | -167.30 | 106650.00 | 5.390 | 0.386 |
| PbTe                                                                            | 529 | -307.61 | 17961.00  | 1.300 | 0.713 |
| Ce <sub>0.75</sub> Fe <sub>3</sub> CoSb <sub>12</sub>                           | 783 | 90.20   | 96585.00  | 7.278 | 0.085 |
| SnS <sub>0.94</sub> Se <sub>0.06</sub>                                          | 573 | 305.00  | 20600.00  | 1.330 | 0.826 |
| Bi <sub>1.9</sub> Nb <sub>0.1</sub> Te <sub>3</sub>                             | 572 | -105.50 | 34481.00  | 0.740 | 0.297 |
| Li <sub>1.04</sub> Co <sub>0.85</sub> Ni <sub>0.15</sub> O <sub>2</sub>         | 423 | 249.00  | 0.48      | 2.008 | 0.000 |
| Cu <sub>12</sub> Sb <sub>4</sub> S <sub>13</sub>                                | 522 | 123.20  | 30440.00  | 0.653 | 0.365 |

|                             |      |         |           |       |       |
|-----------------------------|------|---------|-----------|-------|-------|
| ZrNiSn                      | 771  | -158.30 | 78180.00  | 3.585 | 0.421 |
| Bio.88Pb0.06Yb0.06CuSeO     | 446  | 132.57  | 30968.00  | 0.573 | 0.423 |
| Cu26V2Ge3Sb3S32             | 309  | 116.20  | 57368.00  | 1.692 | 0.141 |
| Ge1.04Te                    | 323  | 72.00   | 463000.00 | 5.240 | 0.170 |
| Ba0.11Yb0.03Co4Sb12         | 600  | -166.90 | 119000.00 | 3.113 | 0.634 |
| Ge0.95Mn0.05Te              | 648  | 140.32  | 160825.00 | 2.546 | 0.806 |
| Ba8.07Cu4.89Si41.03         | 763  | -91.00  | 103700.00 | 2.880 | 0.228 |
| Ca1.58Yb3.42Al2Sb6          | 327  | 21.00   | 30357.00  | 4.000 | 0.001 |
| Sn0.96Pb0.01Cd0.035Se       | 823  | 283.77  | 8864.00   | 0.355 | 1.653 |
| Na0.36Co4Sb12               | 850  | -190    | 117000.00 | 1.800 | 1.000 |
| EuZn2Sb2                    | 500  | 161.70  | 78700.00  | 1.674 | 0.615 |
| SnTe                        | 763  | 120.24  | 140828.00 | 2.934 | 0.533 |
| Sr14MgBi11                  | 914  | 127.84  | 50694.00  | 1.350 | 0.561 |
| Cu1.875Ag0.125SnSe3         | 300  | 173.74  | 3184.00   | 1.102 | 0.026 |
| (Cu3SnS4)0.875(Ga2Te3)0.125 | 741  | 170.20  | 34493.00  | 1.385 | 0.535 |
| Li1.1Co0.85Ni0.15O2         | 1023 | 284.50  | 1114.24   | 1.316 | 0.070 |
| Cu5Sn2S6.65Cl0.35           | 300  | 41.48   | 168657.00 | 2.838 | 0.031 |
| Ca9Yb2Sb7Ge3                | 327  | 20.74   | 309.00    | 1.019 | 0.000 |
| (SnTe)0.98(CuSbTe2)0.02     | 320  | 25.55   | 513706.00 | 6.988 | 0.015 |
| Sr0.21Co4Sb12.25            | 600  | -176.00 | 146364.00 | 3.680 | 0.739 |
| Cu2Se0.9S0.1                | 520  | 86.14   | 65143.00  | 0.696 | 0.361 |
| Pb0.985Zn0.03Te             | 622  | -276.36 | 24868.00  | 1.181 | 1.000 |
| Sn1.03Se0.12Te0.875Br0.005  | 723  | 151.13  | 84211.00  | 2.182 | 0.610 |
| Mg3.5Gd0.02Sb2              | 600  | -295.00 | 9147.00   | 0.770 | 0.620 |
| Ca3Co3.9Ti0.1O9             | 500  | 149.46  | 5964.00   | 2.434 | 0.027 |
| Bio.94Pb0.06CuSeO           | 50   | 26.29   | 189824.00 | 2.166 | 0.003 |
| Ge0.89In0.05Pb0.06Te        | 525  | 185.71  | 54245.00  | 1.227 | 0.801 |
| CuMo6Te8                    | 600  | 11.52   | 178000.00 | 3.640 | 0.004 |
| Zn0.9Cd0.1Sc0.02O1.03       | 1173 | -160.00 | 26500.00  | 2.830 | 0.281 |
| Cu22Sn9SbS32                | 400  | 90.58   | 87805.00  | 2.294 | 0.126 |
| AgBi0.85Sb0.15Se2           | 500  | 510.64  | 239.60    | 0.397 | 0.079 |
| In0.005Pb0.995Te0.996I0.004 | 428  | -200.00 | 42700.00  | 1.756 | 0.416 |
| Cu22Sn9.25Sb0.75S32         | 600  | 112.62  | 91139.00  | 1.885 | 0.368 |

|                                                                                            |     |         |           |       |       |
|--------------------------------------------------------------------------------------------|-----|---------|-----------|-------|-------|
| Sm <sub>0.2</sub> Bi <sub>1.8</sub> Te <sub>3</sub>                                        | 398 | -147.70 | 69000.00  | 0.600 | 0.993 |
| Ti <sub>0.925</sub> Mn <sub>0.075</sub> NiSn <sub>0.925</sub> Sb <sub>0.075</sub>          | 297 | -72.22  | 300000.00 | 7.128 | 0.065 |
| Cu <sub>2.82</sub> Ag <sub>0.18</sub> SbSe <sub>4</sub>                                    | 398 | 381.00  | 7510.00   | 1.150 | 0.377 |
| Ge <sub>0.55</sub> Pb <sub>0.45</sub> Te <sub>0.5</sub> Se <sub>0.5</sub>                  | 569 | 293.17  | 7534.00   | 0.502 | 0.788 |
| FeNb <sub>0.80</sub> Ti <sub>0.20</sub> Sb                                                 | 700 | 150.00  | 165000.00 | 5.300 | 0.490 |
| Sn <sub>1.03</sub> Se <sub>0.12</sub> Te <sub>0.875</sub> Br <sub>0.005</sub>              | 823 | 163.00  | 66667.00  | 2.200 | 0.663 |
| (SnTe) <sub>0.88</sub> (CuSbTe <sub>2</sub> ) <sub>0.12</sub>                              | 818 | 151.10  | 92485.00  | 1.776 | 0.972 |
| Ge <sub>0.98</sub> Mn <sub>0.02</sub> Te                                                   | 698 | 145.16  | 137113.00 | 2.385 | 0.846 |
| Ag <sub>8</sub> GeTe <sub>6</sub>                                                          | 607 | 324.00  | 1760.00   | 0.309 | 0.368 |
| K <sub>0.99</sub> Ba <sub>0.01</sub> GaSb <sub>4</sub>                                     | 602 | -245.92 | 11141.00  | 0.612 | 0.663 |
| AgBiSe <sub>2</sub>                                                                        | 500 | 421.88  | 240.00    | 0.518 | 0.041 |
| In <sub>4</sub> Pb <sub>0.01</sub> Sn <sub>0.03</sub> Se <sub>2.9</sub> Cl <sub>0.02</sub> | 323 | -205.00 | 7453.00   | 0.946 | 0.107 |
| (SnTe) <sub>8</sub> Sb <sub>2</sub> Te <sub>3</sub>                                        | 423 | 120.26  | 117848.00 | 1.890 | 0.381 |
| Ta <sub>0.98</sub> Ti <sub>0.02</sub> FeSb                                                 | 570 | 263.00  | 46900.00  | 6.133 | 0.301 |
| Cu <sub>2</sub> Sn <sub>0.95</sub> Fe <sub>0.05</sub> Se <sub>3</sub>                      | 823 | 185.00  | 29592.00  | 1.000 | 0.850 |
| Mg <sub>2.994</sub> Na <sub>0.006</sub> Sb <sub>2</sub>                                    | 663 | 213.00  | 12375.00  | 0.865 | 0.430 |
| BiSbSe <sub>2.76</sub> Cl <sub>0.24</sub>                                                  | 700 | -245.00 | 6188.00   | 0.410 | 0.634 |
| Cu <sub>2</sub> Zn <sub>0.2</sub> Fe <sub>0.8</sub> SnSe <sub>4</sub>                      | 773 | 221.39  | 6210.00   | 0.693 | 0.340 |
| AgBiSe <sub>2.0</sub>                                                                      | 296 | -154.00 | 7232.00   | 0.645 | 0.079 |
| AgCuTe <sub>0.6</sub> Se <sub>0.4</sub>                                                    | 320 | 219.23  | 11068.00  | 0.536 | 0.318 |
| Cu <sub>2.82</sub> Ag <sub>0.18</sub> SbSe <sub>4</sub>                                    | 373 | 370.00  | 8522.00   | 1.240 | 0.360 |
| (Cu <sub>0.001</sub> Pb <sub>0.999</sub> Te)(MnTe) <sub>0.03</sub>                         | 323 | -227.02 | 46069.00  | 1.813 | 0.423 |
| NbCo <sub>0.92</sub> Ni <sub>0.08</sub> Sn                                                 | 600 | -105.00 | 126512.00 | 7.452 | 0.112 |
| Ca <sub>3</sub> Co <sub>3.7</sub> Ti <sub>0.3</sub> O <sub>9</sub>                         | 700 | 248.00  | 5226.00   | 2.012 | 0.112 |
| Cu <sub>10.5</sub> Ni <sub>1.5</sub> Sb <sub>4</sub> S <sub>13</sub>                       | 715 | 194.20  | 23875.00  | 0.793 | 0.811 |
| Cu <sub>3</sub> P <sub>0.7</sub> Ge <sub>0.3</sub> S <sub>4</sub>                          | 500 | 97.00   | 47000.00  | 1.200 | 0.184 |
| (GeTe) <sub>0.7</sub> (AgSnSe <sub>2</sub> ) <sub>0.3</sub>                                | 423 | 36.02   | 67097.00  | 1.375 | 0.027 |
| Cu <sub>11</sub> ZnSb <sub>4</sub> S <sub>13</sub>                                         | 720 | 245.60  | 7710.00   | 0.307 | 1.091 |
| Ag <sub>1.3</sub> Sb <sub>0.9</sub> Pb <sub>15.7</sub> Te <sub>22.0</sub>                  | 623 | 40.00   | 1670.00   | 1.050 | 0.002 |
| Ba <sub>8</sub> Cu <sub>5.18</sub> Si <sub>9.98</sub> Ge <sub>30.85</sub>                  | 466 | -101.00 | 65700.00  | 1.680 | 0.186 |
| Mg <sub>1.98</sub> Ag <sub>0.02</sub> Zn <sub>0.98</sub> Sb <sub>2</sub>                   | 300 | 94.71   | 62222.00  | 1.078 | 0.155 |
| Sn <sub>0.965</sub> Pb <sub>0.01</sub> Cd <sub>0.025</sub> Se                              | 373 | 336.00  | 3317.00   | 0.783 | 0.178 |
| Nb <sub>0.8</sub> Ta <sub>0.2</sub> CoSn <sub>0.9</sub> Sb <sub>0.1</sub>                  | 430 | -116.15 | 118156.00 | 4.727 | 0.145 |

|                                                                                               |      |         |           |       |       |
|-----------------------------------------------------------------------------------------------|------|---------|-----------|-------|-------|
| Cu <sub>1.55</sub> S                                                                          | 400  | 16.24   | 523558.00 | 4.550 | 0.012 |
| Cu <sub>7</sub> P(S <sub>0.65</sub> Se <sub>0.35</sub> ) <sub>6</sub>                         | 422  | 297.40  | 559.00    | 0.209 | 0.100 |
| Ba <sub>8.01</sub> Ga <sub>15.88</sub> Zn <sub>0.009</sub> Sn <sub>30.11</sub>                | 420  | 423.00  | 6360.00   | 0.829 | 0.577 |
| Ca <sub>10</sub> ZnSb <sub>9</sub>                                                            | 473  | 32.46   | 35.77     | 0.596 | 0.000 |
| FeNb <sub>0.88</sub> Hf <sub>0.12</sub> Sb                                                    | 1200 | 246.10  | 82946.00  | 4.186 | 1.457 |
| Tl <sub>9.0</sub> Bi <sub>0.95</sub> Te <sub>6.0</sub>                                        | 325  | 140.00  | 37455.00  | 0.592 | 0.403 |
| Ce <sub>0.75</sub> Fe <sub>3</sub> CoSb <sub>12</sub>                                         | 423  | 79.30   | 132190.00 | 7.025 | 0.050 |
| Ca <sub>10</sub> InSb <sub>9</sub>                                                            | 398  | 125.94  | 2218.00   | 0.791 | 0.018 |
| Al <sub>0.0075</sub> Sb <sub>0.1</sub> Ge <sub>0.8925</sub> Te                                | 823  | 259.90  | 56305.00  | 1.511 | 1.984 |
| Rb <sub>2</sub> Bi <sub>8</sub> Se <sub>12.961</sub>                                          | 823  | -202.00 | 11818.00  | 0.543 | 0.731 |
| AgCuTe <sub>0.5</sub> Se <sub>0.5</sub>                                                       | 320  | 97.32   | 5534.00   | 0.341 | 0.049 |
| Cu <sub>2.5</sub> Sn <sub>0.5</sub> Sb <sub>0.5</sub> Se <sub>3.5</sub>                       | 372  | 34.29   | 455113.00 | 5.026 | 0.040 |
| Al <sub>0.01</sub> Ge <sub>0.99</sub> Te                                                      | 773  | 144.60  | 191071.00 | 3.060 | 0.962 |
| Ag <sub>0.4</sub> Sb <sub>1.1</sub> Pb <sub>19.6</sub> Te <sub>18.8</sub>                     | 673  | -143.00 | 37000.00  | 1.367 | 0.372 |
| CuFe <sub>0.96</sub> In <sub>0.04</sub> S <sub>2</sub>                                        | 390  | -357.90 | 3916.00   | 3.337 | 0.059 |
| Ge <sub>0.55</sub> Sb <sub>0.25</sub> Te <sub>0.8</sub> (AgSnSe <sub>2</sub> ) <sub>0.2</sub> | 723  | 191.30  | 37419.00  | 0.875 | 1.190 |
| Mg <sub>1.98</sub> Li <sub>0.02</sub> Zn <sub>0.98</sub> Sb <sub>2</sub>                      | 573  | 129.63  | 55026.00  | 1.012 | 0.524 |
| Ag <sub>0.97</sub> Cr <sub>0.95</sub> Bi <sub>0.05</sub> Se <sub>2</sub>                      | 603  | 126.69  | 12336.00  | 0.457 | 0.261 |
| Cu <sub>11.6</sub> Gd <sub>0.4</sub> Sb <sub>4</sub> S <sub>13</sub>                          | 724  | 145.20  | 66010.00  | 1.306 | 0.771 |
| Ca <sub>0.99</sub> Yb <sub>4.01</sub> Al <sub>2</sub> Sb <sub>5.84</sub> Ge <sub>0.16</sub>   | 304  | 180.30  | 607.00    | 1.250 | 0.005 |
| Cu <sub>2</sub> CdSnSe <sub>4</sub>                                                           | 350  | 238.00  | 2741.00   | 2.350 | 0.023 |
| Bi <sub>0.825</sub> Ba <sub>0.175</sub> CuSeO                                                 | 725  | 201.28  | 11635.00  | 0.586 | 0.686 |
| Eu(Zn <sub>0.9</sub> Cd <sub>0.1</sub> ) <sub>2</sub> Sb <sub>2</sub>                         | 350  | 138.00  | 95200.00  | 2.080 | 0.305 |
| Ag <sub>2.0</sub> Se <sub>0.5</sub> Te <sub>0.5</sub>                                         | 375  | -104.00 | 64000.00  | 0.670 | 0.387 |
| Er <sub>0.02</sub> (Bi <sub>0.23</sub> Sb <sub>0.77</sub> ) <sub>1.98</sub> Te <sub>3</sub>   | 400  | 237.52  | 40731.00  | 0.845 | 1.088 |
| CuAgTe <sub>0.7</sub> Se <sub>0.3</sub>                                                       | 393  | 261.68  | 7133.00   | 0.216 | 0.887 |
| Ca <sub>0.2</sub> BaGd <sub>1.8</sub> NiO <sub>5</sub>                                        | 489  | 211.03  | 73.47     | 1.654 | 0.001 |
| AgBi <sub>0.85</sub> Sb <sub>0.15</sub> Se <sub>2</sub>                                       | 525  | 526.60  | 238.80    | 0.418 | 0.083 |
| Ge <sub>0.55</sub> Pb <sub>0.45</sub> Te <sub>0.5</sub> Se <sub>0.5</sub>                     | 470  | 300.62  | 6875.00   | 0.529 | 0.580 |
| Rb <sub>2</sub> Bi <sub>8</sub> Se <sub>12.9415</sub>                                         | 428  | -194.40 | 8030.00   | 0.664 | 0.196 |
| Rb <sub>2</sub> Bi <sub>8</sub> Se <sub>12.9805</sub> Cl <sub>0.0195</sub>                    | 823  | -167.55 | 12132.00  | 0.604 | 0.464 |
| TlCr <sub>5</sub> Se <sub>8</sub>                                                             | 723  | 296.00  | 4880.00   | 0.680 | 0.455 |
| Ce <sub>0.2</sub> Bi <sub>1.8</sub> Te <sub>3</sub>                                           | 373  | -141.20 | 84083.00  | 0.577 | 1.084 |

|                                                                                |      |         |           |       |       |
|--------------------------------------------------------------------------------|------|---------|-----------|-------|-------|
| AgBiSe <sub>2.12</sub>                                                         | 350  | 657.90  | 72.00     | 0.645 | 0.017 |
| Mg <sub>3</sub> Sb <sub>2</sub>                                                | 565  | 296.00  | 688.00    | 0.890 | 0.038 |
| Bi <sub>0.92</sub> Ag <sub>0.08</sub> CuSeO                                    | 323  | 184.70  | 2420.00   | 0.526 | 0.051 |
| Sn <sub>0.985</sub> In <sub>0.015</sub> Te                                     | 423  | 63.65   | 420230.00 | 5.722 | 0.126 |
| SnSe <sub>0.9</sub> S <sub>0.1</sub>                                           | 573  | 305.66  | 4189.00   | 0.805 | 0.256 |
| Cu <sub>2.025</sub> Cd <sub>0.975</sub> SnSe <sub>4</sub>                      | 600  | 194.80  | 6879.00   | 0.993 | 0.158 |
| CuGa <sub>0.97</sub> Mn <sub>0.03</sub> Te <sub>2</sub>                        | 525  | 224.00  | 21053.00  | 3.184 | 0.174 |
| LiCoO <sub>2</sub>                                                             | 923  | 742.07  | 27.52     | 2.671 | 0.005 |
| Ag <sub>0.97</sub> Cr <sub>0.97</sub> Sb <sub>0.03</sub> Se <sub>2</sub>       | 703  | 150.00  | 15772.00  | 0.405 | 0.615 |
| Sm <sub>0.15</sub> Co <sub>4</sub> Sb <sub>12</sub>                            | 300  | -131    | 210000.00 | 2.300 | 0.300 |
| CoSb <sub>3.0</sub>                                                            | 373  | -218.00 | 3125.00   | 6.100 | 0.009 |
| Ag <sub>0.01</sub> Sn <sub>0.99</sub> Se <sub>0.9</sub> S <sub>0.1</sub>       | 666  | 410.26  | 837.00    | 0.237 | 0.396 |
| Yb <sub>14</sub> MgBi <sub>11</sub>                                            | 717  | 78.64   | 62393.00  | 1.833 | 0.151 |
| (PbTe) <sub>0.05</sub> (Ag <sub>2</sub> Te) <sub>0.95</sub>                    | 550  | -154.60 | 29000.00  | 0.469 | 0.822 |
| LiGe <sub>11.5</sub> Sb <sub>2</sub> Te <sub>15</sub>                          | 523  | 243.00  | 46630.00  | 1.375 | 1.060 |
| Ag <sub>0.97</sub> Cr <sub>0.99</sub> Bi <sub>0.01</sub> Se <sub>2</sub>       | 503  | 111.86  | 12368.00  | 0.453 | 0.172 |
| Sr <sub>14.8</sub> Ga <sub>28.6</sub> Ge <sub>56.6</sub>                       | 408  | -87.30  | 108391.00 | 2.151 | 0.157 |
| Cu <sub>12</sub> Sb <sub>4</sub> S <sub>13</sub>                               | 324  | 73.68   | 103319.00 | 1.511 | 0.120 |
| Gd <sub>2.79</sub> Se <sub>4</sub>                                             | 850  | -150.40 | 15130.00  | 1.260 | 0.231 |
| Pb <sub>0.98</sub> Zn <sub>0.035</sub> Te                                      | 719  | -273.70 | 25860.00  | 1.141 | 1.221 |
| Mg <sub>3.5</sub> Ho <sub>0.04</sub> Sb <sub>2</sub>                           | 700  | -310.49 | 9655.00   | 0.717 | 0.909 |
| Ca <sub>2</sub> Yb <sub>9</sub> Sb <sub>10</sub>                               | 327  | 1.63    | 150204.00 | 1.780 | 0.000 |
| Sb <sub>2</sub> Si <sub>2</sub> Te <sub>6</sub>                                | 373  | 139.80  | 30275.00  | 0.861 | 0.256 |
| Gd <sub>2.84</sub> Se <sub>4</sub>                                             | 450  | -77.90  | 31600.00  | 1.287 | 0.067 |
| Cu <sub>11.5</sub> Gd <sub>0.5</sub> Sb <sub>4</sub> S <sub>13</sub>           | 425  | 98.55   | 90336.00  | 1.406 | 0.265 |
| Nb <sub>0.8</sub> Co <sub>0.92</sub> Ni <sub>0.08</sub> Sb                     | 1123 | -213.00 | 44510.00  | 1.690 | 0.900 |
| Ag <sub>0.6</sub> Sb <sub>0.9</sub> Pb <sub>19.5</sub> Te <sub>19.1</sub>      | 673  | -198.00 | 27700.00  | 1.700 | 0.420 |
| Sr <sub>14.1</sub> Ga <sub>29.6</sub> Ge <sub>56.3</sub>                       | 669  | -161.00 | 38620.00  | 1.625 | 0.412 |
| In <sub>0.015</sub> Pb <sub>0.985</sub> Te <sub>0.994</sub> l <sub>0.006</sub> | 481  | -219.50 | 25300.00  | 1.515 | 0.389 |
| TiZr <sub>0.015</sub> NiSn                                                     | 423  | -176.49 | 47231.00  | 2.380 | 0.277 |
| Cu <sub>5</sub> SnSbSe <sub>7</sub>                                            | 473  | 43.79   | 370500.00 | 4.629 | 0.073 |
| Ca <sub>3</sub> AlSb <sub>3</sub>                                              | 822  | 390.00  | 516.00    | 0.622 | 0.101 |
| Mg <sub>3.5</sub> Gd <sub>0.045</sub> Sb <sub>2</sub>                          | 500  | -244.29 | 19592.00  | 0.939 | 0.623 |



|                                                                                              |      |         |           |       |       |
|----------------------------------------------------------------------------------------------|------|---------|-----------|-------|-------|
| Sr <sub>0.21</sub> Yb <sub>0.03</sub> Co <sub>4</sub> Sb <sub>12.12</sub>                    | 450  | -136.00 | 260000.00 | 3.850 | 0.562 |
| Cu <sub>2.075</sub> Sn <sub>0.925</sub> S <sub>3</sub>                                       | 500  | 61.15   | 225000.00 | 3.271 | 0.129 |
| Rb <sub>2</sub> Bi <sub>8</sub> Se <sub>12.9805</sub>                                        | 428  | -257.20 | 5455.00   | 0.619 | 0.250 |
| (PbTe) <sub>0.15</sub> (Ag <sub>2</sub> Te) <sub>0.85</sub>                                  | 550  | -174.70 | 24300.00  | 0.523 | 0.772 |
| Ag <sub>0.98</sub> Nb <sub>0.02</sub> BiSe <sub>2.0</sub>                                    | 577  | -223.70 | 6305.00   | 0.487 | 0.374 |
| (Zn <sub>0.95</sub> In <sub>0.05</sub> ) <sub>4</sub> Sb <sub>3</sub>                        | 373  | 155.80  | 24528.00  | 0.843 | 0.263 |
| As <sub>2</sub> Te <sub>2.8</sub> Se <sub>0.2</sub>                                          | 323  | 192.08  | 921.06    | 0.619 | 0.018 |
| ZrNiSn                                                                                       | 376  | -101.04 | 36966.00  | 4.220 | 0.034 |
| Mg <sub>3.07</sub> Sb <sub>1.5</sub> Bi <sub>0.47</sub> Se <sub>0.03</sub>                   | 400  | -293.48 | 8602.00   | 0.735 | 0.403 |
| Yb <sub>12</sub> CaBaMgSb <sub>11</sub>                                                      | 1000 | 207.46  | 13466.00  | 0.678 | 0.855 |
| Ba <sub>0.9</sub> K <sub>0.1</sub> Zn <sub>2</sub> As <sub>2</sub>                           | 623  | 71.00   | 106670.00 | 2.901 | 0.115 |
| Cr <sub>1.99</sub> Fe <sub>0.01</sub> Ge <sub>2</sub> Te <sub>6</sub>                        | 713  | 315.46  | 2488.37   | 0.623 | 0.284 |
| Cu <sub>1.9</sub> Ag <sub>0.1</sub> SnSe <sub>3</sub>                                        | 600  | 194.44  | 4133.00   | 0.629 | 0.149 |
| Ti <sub>0.98</sub> Mn <sub>0.02</sub> NiSn <sub>0.98</sub> Sb <sub>0.02</sub>                | 697  | -153.70 | 152318.00 | 5.560 | 0.451 |
| Ag <sub>8</sub> Sn <sub>0.7</sub> Ga <sub>0.3</sub> Se <sub>6</sub>                          | 426  | -442.99 | 132.00    | 0.243 | 0.069 |
| Yb <sub>13.44</sub> Ce <sub>0.4</sub> Mn <sub>1.09</sub> Sb <sub>11.07</sub>                 | 473  | 102.60  | 28150.00  | 0.742 | 0.189 |
| Bi <sub>0.96</sub> Pb <sub>0.04</sub> CuSeO                                                  | 50   | 29.63   | 213745.00 | 2.790 | 0.003 |
| Bi <sub>2.0</sub> S <sub>2.91</sub> Se <sub>0.09</sub>                                       | 523  | -483.00 | 464.00    | 0.585 | 0.097 |
| Cu <sub>2</sub> SnSe <sub>3</sub>                                                            | 800  | 214.65  | 10333.00  | 0.737 | 0.517 |
| Yb <sub>0.19</sub> Co <sub>4</sub> Sb <sub>12</sub>                                          | 300  | -141    | 164000.00 | 2.900 | 0.300 |
| Cu <sub>2.1</sub> Cd <sub>0.9</sub> SnSe <sub>4</sub>                                        | 400  | 134.70  | 22184.00  | 1.450 | 0.111 |
| Mg <sub>2.16</sub> (Si <sub>0.4</sub> Sn <sub>0.6</sub> ) <sub>0.97</sub> Bi <sub>0.03</sub> | 300  | -120.35 | 203876.00 | 2.765 | 0.320 |
| Ag <sub>8</sub> Sn <sub>0.6</sub> Ga <sub>0.4</sub> Se <sub>6</sub>                          | 601  | -303.50 | 2343.00   | 0.296 | 0.439 |
| Ba <sub>0.24</sub> Co <sub>4</sub> Sb <sub>11.87</sub>                                       | 300  | -88     | 323400.00 | 3.400 | 0.100 |
| Ti <sub>0.95</sub> Mn <sub>0.05</sub> NiSn <sub>0.95</sub> Sb <sub>0.05</sub>                | 797  | -160.00 | 168874.00 | 5.597 | 0.616 |
| Ca <sub>0.15</sub> BaGd <sub>1.85</sub> NiO <sub>5</sub>                                     | 1275 | 221.32  | 546.52    | 1.570 | 0.022 |
| Cu <sub>2</sub> SnSe <sub>3</sub>                                                            | 500  | 125.00  | 15909.00  | 1.060 | 0.117 |
| Cu <sub>3</sub> Sb <sub>0.998</sub> In <sub>0.002</sub> Se <sub>4</sub>                      | 373  | 284.50  | 4444.00   | 1.920 | 0.070 |
| Ag <sub>0.97</sub> Cr <sub>0.95</sub> Bi <sub>0.05</sub> Se <sub>2</sub>                     | 703  | 162.71  | 8902.00   | 0.464 | 0.357 |
| Pb <sub>0.99</sub> Tl <sub>0.01</sub> Te                                                     | 301  | 119.81  | 59076.00  | 2.256 | 0.113 |
| Eu(Zn <sub>0.9</sub> Cd <sub>0.1</sub> ) <sub>2</sub> Sb <sub>2</sub>                        | 450  | 161.50  | 81400.00  | 1.750 | 0.546 |
| Cu <sub>2.5</sub> Sn <sub>0.5</sub> Sb <sub>0.5</sub> Se <sub>3.5</sub>                      | 473  | 42.86   | 370149.00 | 4.645 | 0.069 |
| Cu <sub>2.7</sub> Ag <sub>0.3</sub> ErTe <sub>3</sub>                                        | 800  | 117.00  | 43560.00  | 0.660 | 0.723 |

|                                                                                                                 |      |         |           |       |       |
|-----------------------------------------------------------------------------------------------------------------|------|---------|-----------|-------|-------|
| Cu <sub>2</sub> Se                                                                                              | 303  | 72.70   | 143966.00 | 1.200 | 0.192 |
| AgBiSe <sub>2.0</sub>                                                                                           | 660  | -272.00 | 4251.00   | 0.467 | 0.444 |
| SnS                                                                                                             | 500  | 624.00  | 2.50      | 0.875 | 0.001 |
| Yb <sub>13.44</sub> Ce <sub>0.4</sub> Mn <sub>1.09</sub> Sb <sub>11.07</sub>                                    | 1173 | 230.40  | 11750.00  | 0.726 | 1.008 |
| GeSe <sub>0.9</sub> Te <sub>0.1</sub>                                                                           | 320  | 75.31   | 2974.00   | 1.932 | 0.003 |
| Ca <sub>2</sub> Yb <sub>9</sub> Sb <sub>10</sub>                                                                | 419  | 4.89    | 132653.00 | 1.944 | 0.001 |
| SnTe                                                                                                            | 714  | 99.00   | 177515.00 | 3.328 | 0.379 |
| Ca <sub>0.15</sub> BaGd <sub>1.85</sub> NiO <sub>5</sub>                                                        | 513  | 224.26  | 123.54    | 2.040 | 0.002 |
| Ge <sub>0.99</sub> Mn <sub>0.01</sub> Te                                                                        | 398  | 43.87   | 432990.00 | 5.914 | 0.056 |
| CuFe <sub>0.92</sub> In <sub>0.08</sub> S <sub>2</sub>                                                          | 510  | -372.50 | 2630.00   | 2.037 | 0.091 |
| Cr <sub>2</sub> Ge <sub>2</sub> Te <sub>6</sub>                                                                 | 320  | 573.71  | 46.88     | 0.916 | 0.005 |
| Eu <sub>0.34</sub> Co <sub>4</sub> Sb <sub>12</sub>                                                             | 300  | -71     | 416200.00 | 2.000 | 0.100 |
| Bi <sub>2.0</sub> S <sub>3.0</sub>                                                                              | 523  | -627.00 | 72.40     | 0.505 | 0.029 |
| Ag(Bi <sub>0.85</sub> Pb <sub>0.15</sub> ) <sub>0.9</sub> Sb <sub>0.1</sub> Se <sub>2</sub>                     | 576  | 313.89  | 522.00    | 0.461 | 0.064 |
| Zn <sub>0.85</sub> Cd <sub>0.15</sub> Sc <sub>0.02</sub> O <sub>1.03</sub>                                      | 873  | -108.00 | 16800.00  | 3.800 | 0.045 |
| Yb <sub>12</sub> CaBaMgSb <sub>11</sub>                                                                         | 600  | 127.07  | 21416.00  | 0.719 | 0.289 |
| (Ag <sub>0.1</sub> Sb <sub>0.1</sub> Sn <sub>0.8</sub> )(S <sub>0.1</sub> Se <sub>0.1</sub> Te <sub>0.8</sub> ) | 593  | 129.90  | 82710.00  | 1.392 | 0.595 |
| Ba <sub>0.5</sub> Cr <sub>5</sub> Se <sub>8</sub>                                                               | 743  | 294.26  | 1411.00   | 0.956 | 0.095 |
| S <sub>0.08</sub> Pd <sub>0.20</sub> Co <sub>3.80</sub> Sb <sub>12.04</sub>                                     | 850  | -213    | 47600.00  | 2.800 | 0.500 |
| TiNiSn                                                                                                          | 797  | -154.81 | 103311.00 | 5.678 | 0.348 |
| GeSe <sub>0.6</sub> Te <sub>0.4</sub>                                                                           | 728  | 122.20  | 115672.00 | 2.264 | 0.555 |
| Cu <sub>2.025</sub> Cd <sub>0.975</sub> SnSe <sub>4</sub>                                                       | 300  | 173.00  | 5362.00   | 2.673 | 0.018 |
| Mg <sub>2.16</sub> (Si <sub>0.4</sub> Sn <sub>0.6</sub> ) <sub>0.97</sub> Bi <sub>0.03</sub>                    | 500  | -162.80 | 146100.00 | 2.389 | 0.810 |
| BiCuSeO                                                                                                         | 673  | 363.00  | 1800.00   | 0.493 | 0.324 |
| YbCd <sub>1.8</sub> Zn <sub>0.2</sub> Sb <sub>3</sub>                                                           | 450  | 165.10  | 54813.00  | 1.575 | 0.427 |
| Ca <sub>9</sub> Yb <sub>2</sub> Sb <sub>9</sub> Ge                                                              | 608  | 7.11    | 16907.00  | 0.988 | 0.001 |
| Cu <sub>2</sub> Se <sub>0.94</sub> S <sub>0.06</sub>                                                            | 750  | 223.68  | 22629.00  | 0.744 | 1.141 |
| La <sub>0.3</sub> Co <sub>4</sub> Sb <sub>12</sub>                                                              | 573  | 93.00   | 26217.00  | 3.333 | 0.039 |
| Yb <sub>14</sub> MgBi <sub>11</sub>                                                                             | 1013 | 108.00  | 54670.00  | 1.626 | 0.397 |
| Cu <sub>2</sub> Se <sub>0.92</sub> I <sub>0.08</sub>                                                            | 350  | 175.00  | 11446.00  | 0.256 | 0.479 |
| GeSe <sub>0.65</sub> Te <sub>0.35</sub>                                                                         | 430  | 18.00   | 110075.00 | 1.864 | 0.008 |
| CuFe <sub>0.98</sub> In <sub>0.02</sub> S <sub>2</sub>                                                          | 390  | -348.80 | 4715.00   | 4.000 | 0.056 |
| Sn <sub>0.98</sub> Ce <sub>0.02</sub> Te                                                                        | 423  | 40.86   | 321520.00 | 4.155 | 0.055 |

|                                                                                           |       |         |           |       |       |
|-------------------------------------------------------------------------------------------|-------|---------|-----------|-------|-------|
| TiNiSn                                                                                    | 697   | -172.32 | 91391.00  | 5.255 | 0.360 |
| CaTiO <sub>3</sub>                                                                        | 840   | -295.30 | 2150.00   | 3.140 | 0.050 |
| Ba <sub>0.95</sub> K <sub>0.05</sub> Zn <sub>2</sub> As <sub>2</sub>                      | 323   | 31.00   | 213333.00 | 3.733 | 0.018 |
| GeSe <sub>0.75</sub> Te <sub>0.25</sub>                                                   | 430   | 20.53   | 83955.00  | 1.626 | 0.009 |
| Cu <sub>2</sub> CdSnSe <sub>4</sub>                                                       | 550   | 261.70  | 3465.00   | 1.370 | 0.095 |
| Zn <sub>0.97</sub> Al <sub>0.03</sub> O                                                   | 373   | -68.00  | 49000.00  | 7.400 | 0.011 |
| Zn <sub>0.9</sub> Cd <sub>0.1</sub> Sc <sub>0.03</sub> O <sub>1.045</sub>                 | 673   | -111.00 | 40000.00  | 4.380 | 0.076 |
| (Sn <sub>0.985</sub> In <sub>0.015</sub> Te) <sub>0.85</sub> (AgCl) <sub>0.15</sub>       | 623   | 98.99   | 195506.00 | 2.978 | 0.396 |
| Ti <sub>0.97</sub> Mn <sub>0.03</sub> NiSn <sub>0.97</sub> Sb <sub>0.03</sub>             | 297   | -95.57  | 143709.00 | 5.940 | 0.066 |
| Cu <sub>22</sub> Sn <sub>9</sub> SbS <sub>32</sub>                                        | 300   | 72.46   | 103152.00 | 2.800 | 0.058 |
| YbCd <sub>1.7</sub> Zn <sub>0.3</sub> Sb <sub>2</sub>                                     | 650   | 179.00  | 49043.00  | 1.288 | 0.833 |
| Ag <sub>0.4</sub> Sb <sub>1.1</sub> Pb <sub>19.6</sub> Te <sub>18.8</sub>                 | 623   | -145.60 | 24032.00  | 1.340 | 0.237 |
| Mg <sub>2</sub> Cu <sub>3</sub> In <sub>3</sub> Te <sub>8</sub>                           | 620   | 283.00  | 5950.00   | 1.548 | 0.191 |
| GeSe                                                                                      | 326   | 774.26  | 3.13      | 2.845 | 0.000 |
| Ag <sub>0.98</sub> Nb <sub>0.02</sub> BiSe <sub>2.0</sub>                                 | 478   | -164.70 | 11852.00  | 0.666 | 0.231 |
| Ba <sub>8.01</sub> Ga <sub>15.88</sub> Zn <sub>0.009</sub> Sn <sub>30.11</sub>            | 340   | 389.08  | 7197.00   | 0.883 | 0.420 |
| As <sub>2</sub> Te <sub>2.9</sub> Se <sub>0.1</sub>                                       | 373   | 159.41  | 1063.62   | 0.634 | 0.023 |
| Gd <sub>2.84</sub> Se <sub>4</sub>                                                        | 350   | -58.50  | 35100.00  | 1.283 | 0.033 |
| Ba <sub>0.5</sub> Cr <sub>5</sub> Se <sub>8</sub>                                         | 507.4 | 285.81  | 709.00    | 1.278 | 0.023 |
| Zn <sub>0.9</sub> Cd <sub>0.1</sub> Sc <sub>0.02</sub> O <sub>1.03</sub>                  | 373   | -80.00  | 55500.00  | 6.500 | 0.020 |
| Ag <sub>2.0</sub> Se <sub>0.9</sub> Te <sub>0.1</sub>                                     | 300   | -137.80 | 90000.00  | 0.790 | 0.649 |
| Tl <sub>9.0</sub> Sb <sub>0.98</sub> Te <sub>6</sub>                                      | 326   | 106.00  | 53000.00  | 0.690 | 0.281 |
| Sn <sub>0.97</sub> Mn <sub>0.03</sub> Te                                                  | 527   | 69.92   | 268639.00 | 5.026 | 0.138 |
| Hf <sub>0.8</sub> Ti <sub>0.2</sub> CoSb <sub>0.8</sub> Sn <sub>0.2</sub>                 | 885   | 229.00  | 47670.00  | 2.669 | 0.829 |
| Li <sub>0.02</sub> Cu <sub>1.85</sub> Se                                                  | 502   | 35.71   | 296154.00 | 3.261 | 0.058 |
| Cu <sub>2</sub> SnSe <sub>3</sub>                                                         | 823   | 207.38  | 8844.00   | 0.900 | 0.352 |
| Cu <sub>10.5</sub> Ni <sub>1.3</sub> Zn <sub>0.2</sub> Sb <sub>4</sub> S <sub>13</sub>    | 517   | 177.00  | 22570.00  | 0.658 | 0.562 |
| Ca <sub>2</sub> Yb <sub>9</sub> Sb <sub>10</sub>                                          | 701   | 13.48   | 107292.00 | 2.348 | 0.006 |
| Ca <sub>0.25</sub> BaGd <sub>1.75</sub> NiO <sub>5</sub>                                  | 579   | 163.97  | 131.27    | 1.300 | 0.002 |
| Ba <sub>0.10</sub> La <sub>0.05</sub> Yb <sub>0.10</sub> Co <sub>4</sub> Sb <sub>12</sub> | 850   | -185    | 163100.00 | 0.300 | 1.600 |
| LiCo <sub>0.96</sub> Ni <sub>0.04</sub> O <sub>2</sub>                                    | 323   | 390.34  | 0.00      | 2.034 | 0.000 |
| Ca <sub>0.1</sub> BaGd <sub>1.9</sub> NiO <sub>5</sub>                                    | 939   | 163.97  | 192.81    | 1.875 | 0.003 |
| Cu <sub>22</sub> Sn <sub>10</sub> S <sub>32</sub>                                         | 300   | 44.63   | 246575.00 | 3.514 | 0.042 |

|                                                                                             |      |         |           |       |       |
|---------------------------------------------------------------------------------------------|------|---------|-----------|-------|-------|
| CuAgTe <sub>0.7</sub> Se <sub>0.3</sub>                                                     | 403  | 255.43  | 6695.00   | 0.282 | 0.624 |
| Mg <sub>3.07</sub> Sb <sub>1.5</sub> Bi <sub>0.44</sub> Se <sub>0.06</sub>                  | 500  | -312.69 | 9022.00   | 0.740 | 0.596 |
| Gd <sub>2</sub> Se <sub>2.92</sub>                                                          | 650  | -131.16 | 21329.00  | 1.245 | 0.192 |
| Ca <sub>0.05</sub> BaGd <sub>1.95</sub> NiO <sub>5</sub>                                    | 1037 | 256.62  | 107.19    | 1.384 | 0.005 |
| Ca <sub>1.14</sub> Yb <sub>3.86</sub> Al <sub>1.68</sub> In <sub>0.32</sub> Sb <sub>6</sub> | 330  | 156.90  | 9024.00   | 1.133 | 0.065 |
| Cu <sub>1.99</sub> In <sub>0.01</sub> Se                                                    | 572  | 164.85  | 41892.00  | 0.888 | 0.700 |
| CuGa <sub>0.99</sub> Mn <sub>0.01</sub> Te <sub>2</sub>                                     | 375  | 339.70  | 5702.00   | 4.440 | 0.056 |
| CoAsSb                                                                                      | 900  | -81.70  | 112033.00 | 5.315 | 0.127 |
| FeNb <sub>0.86</sub> Hf <sub>0.14</sub> Sb                                                  | 700  | 165.00  | 217829.00 | 4.966 | 0.836 |
| Ge <sub>0.55</sub> Pb <sub>0.45</sub> Te <sub>0.2</sub> Se <sub>0.8</sub>                   | 470  | 280.63  | 2022.00   | 0.780 | 0.049 |
| NbCo <sub>0.94</sub> Ni <sub>0.06</sub> Sn                                                  | 998  | -112.35 | 91905.00  | 6.071 | 0.191 |
| S <sub>0.04</sub> Pd <sub>0.20</sub> Co <sub>3.80</sub> Sb <sub>11.99</sub>                 | 580  | -216    | 58900.00  | 2.800 | 0.600 |
| (SnTe) <sub>25</sub> Sb <sub>2</sub> Te <sub>3</sub>                                        | 623  | 114.57  | 159250.00 | 2.810 | 0.463 |
| Ag(Bi <sub>0.9</sub> Nb <sub>0.1</sub> ) <sub>0.7</sub> Sb <sub>0.3</sub> Se <sub>2</sub>   | 676  | -278.00 | 2818.00   | 0.558 | 0.264 |
| (CaZn <sub>0.4</sub> Ag <sub>0.2</sub> Sb) <sub>0.83</sub> (LiZnSb) <sub>0.17</sub>         | 472  | 143.51  | 33592.00  | 0.907 | 0.360 |
| Bi <sub>0.96</sub> Ag <sub>0.04</sub> CuSeO                                                 | 873  | 343.00  | 2735.00   | 0.466 | 0.603 |
| As <sub>2</sub> Te <sub>2</sub> Se                                                          | 298  | 224.24  | 6.23      | 0.473 | 0.000 |
| Pb <sub>0.9825</sub> Tl <sub>0.0075</sub> Na <sub>0.01</sub> Te                             | 301  | 105.84  | 108496.00 | 2.522 | 0.145 |
| As <sub>2</sub> Te <sub>2</sub> Se                                                          | 323  | 242.42  | 9.21      | 0.460 | 0.000 |
| YbCd <sub>1.9</sub> Zn <sub>0.1</sub> Sb <sub>2</sub>                                       | 350  | 137.32  | 61377.00  | 1.955 | 0.207 |
| Pb <sub>0.99</sub> Tl <sub>0.01</sub> Te                                                    | 696  | 273.53  | 23824.00  | 0.961 | 1.291 |
| Ti <sub>0.99</sub> Mn <sub>0.01</sub> NiSn <sub>0.99</sub> Sb <sub>0.01</sub>               | 797  | -164.97 | 112583.00 | 5.600 | 0.436 |
| Mg <sub>1.98</sub> K <sub>0.02</sub> Zn <sub>0.98</sub> Sb <sub>2</sub>                     | 373  | 237.04  | 8677.00   | 0.667 | 0.273 |
| In <sub>3.94</sub> Pb <sub>0.06</sub> Se <sub>3</sub>                                       | 480  | -256.00 | 8700.00   | 1.220 | 0.224 |
| Cu <sub>7</sub> P(S <sub>0.6</sub> Se <sub>0.4</sub> ) <sub>6</sub>                         | 325  | 288.70  | 379.00    | 0.220 | 0.047 |
| AgCuTe <sub>0.8</sub> Se <sub>0.2</sub>                                                     | 320  | 97.00   | 29515.00  | 0.635 | 0.140 |
| GeTe                                                                                        | 698  | 142.58  | 162887.00 | 2.514 | 0.919 |
| Rb <sub>2</sub> Bi <sub>8</sub> Se <sub>12.961</sub>                                        | 724  | -228.80 | 8295.00   | 0.526 | 0.598 |
| Yb <sub>8</sub> Ca <sub>5</sub> BaMgSb <sub>11</sub>                                        | 500  | 129.30  | 14600.00  | 0.578 | 0.211 |
| Ca <sub>3</sub> Al <sub>0.98</sub> Zn <sub>0.02</sub> Sb <sub>3</sub>                       | 622  | 248.00  | 4350.00   | 0.830 | 0.205 |
| Li <sub>0.01</sub> Cu <sub>1.85</sub> Se                                                    | 301  | 26.49   | 436538.00 | 2.425 | 0.038 |
| Ag <sub>0.04</sub> Cr <sub>1.96</sub> Se <sub>3</sub>                                       | 405  | 110.39  | 34110.00  | 1.499 | 0.112 |
| AgSb <sub>0.93</sub> Mn <sub>0.07</sub> Te <sub>2</sub>                                     | 442  | 103.83  | 91351.00  | 1.184 | 0.368 |

|                                                                               |     |         |           |        |       |
|-------------------------------------------------------------------------------|-----|---------|-----------|--------|-------|
| $\text{S}_{0.26}\text{Co}_{4}\text{Sb}_{11.11}\text{Te}_{0.73}$               | 300 | -137    | 111000.00 | 1.500  | 0.300 |
| $\text{Mg}_2\text{ZnSb}_2$                                                    | 473 | 150.33  | 1523.00   | 0.741  | 0.022 |
| $\text{Al}_{0.0075}\text{Sb}_{0.1}\text{Ge}_{0.8925}\text{Te}$                | 373 | 167.20  | 53333.00  | 1.491  | 0.373 |
| $(\text{Cu}_3\text{SnS}_4)_{0.895}(\text{Ga}_2\text{Te}_3)_{0.105}$           | 405 | 62.63   | 161268.00 | 2.886  | 0.089 |
| $\text{Gd}_2\text{Se}_{2.98}$                                                 | 650 | -183.80 | 24060.00  | 1.358  | 0.389 |
| $\text{Cu}_{26}\text{V}_2\text{Ge}_6\text{S}_{32}$                            | 309 | 18.81   | 545000.00 | 5.315  | 0.011 |
| $\text{MgAgSb}_{0.985}\text{In}_{0.015}$                                      | 500 | 183.09  | 77838.00  | 1.449  | 0.900 |
| $\text{Ca}_3\text{Co}_2\text{O}_6$                                            | 873 | 142.00  | 8100.00   | 3.870  | 0.037 |
| $\text{Ca}_{1.14}\text{Yb}_{3.86}\text{Al}_{1.68}\text{In}_{0.32}\text{Sb}_6$ | 725 | 143.37  | 6402.00   | 1.025  | 0.093 |
| $\text{Sn}_{0.94}\text{Se}_{0.06}$                                            | 423 | 259.00  | 47100.00  | 1.810  | 0.738 |
| $\text{CrSe}_3$                                                               | 619 | 165.60  | 23036.00  | 1.781  | 0.218 |
| $\text{Co}_4\text{Sb}_{11.7}\text{Te}_{0.3}$                                  | 850 | -231    | 33000.00  | 3.300  | 0.400 |
| $\text{Ga}_{0.03}\text{Co}_4\text{Sb}_{11.985}\text{Ga}_{0.015}$              | 650 | -268    | 11800.00  | 2.400  | 0.200 |
| $\text{Cu}_2\text{Zn}_{0.8}\text{Fe}_{0.2}\text{SnSe}_4$                      | 473 | 360.12  | 155.35    | 1.539  | 0.006 |
| $\text{Al}_{0.03}\text{Ge}_{0.97}\text{Te}$                                   | 323 | 37.50   | 555357.00 | 6.051  | 0.042 |
| $\text{Cu}_5\text{Sn}_2\text{Se}_7$                                           | 500 | 34.42   | 383900.00 | 4.304  | 0.053 |
| $\text{Zn}_{0.95}\text{Cd}_{0.05}\text{Sc}_{0.02}\text{O}_{1.03}$             | 673 | -110.00 | 16000.00  | 5.920  | 0.022 |
| $\text{NbCoSb}$                                                               | 974 | -139.80 | 101380.00 | 3.040  | 0.400 |
| $\text{Ag}(\text{Bi}_{0.9}\text{Nb}_{0.1})_{0.7}\text{Sb}_{0.3}\text{Se}_2$   | 478 | -263.00 | 2089.00   | 0.540  | 0.128 |
| $\text{Yb}_{13.44}\text{Ce}_{0.4}\text{Mn}_{1.09}\text{Sb}_{11.07}$           | 573 | 130.50  | 23502.00  | 0.739  | 0.310 |
| $\text{NbCo}_{0.98}\text{Ni}_{0.02}\text{Sn}$                                 | 605 | -161.76 | 59048.00  | 8.321  | 0.112 |
| $\text{Co}_{0.95}\text{Ni}_{0.05}\text{GeTe}$                                 | 701 | -94.04  | 120899.00 | 4.893  | 0.153 |
| $\text{Sn}_{0.91}\text{Se}_{0.09}$                                            | 423 | 242.50  | 73350.00  | 1.710  | 1.054 |
| $\text{Ca}_5\text{Ga}_{1.8}\text{Zn}_{0.2}\text{Sb}_6$                        | 525 | 85.70   | 45100.00  | 1.510  | 0.115 |
| $\text{Cu}_{0.99}\text{Pd}_{0.01}\text{FeS}_2$                                | 70  | -172.50 | 1382.00   | 29.200 | 0.000 |
| $\text{Li}_{1.1}\text{Co}_{0.85}\text{Ni}_{0.15}\text{O}_2$                   | 523 | 228.50  | 9.40      | 2.721  | 0.000 |
| $\text{La}_{0.2}\text{Ca}_{0.8}\text{TiO}_3$                                  | 840 | -153.00 | 40322.00  | 2.846  | 0.279 |
| $\text{TaFeSb}$                                                               | 770 | 98.00   | 3324.00   | 5.018  | 0.005 |
| $\text{Bi}_{0.92}\text{Pb}_{0.04}\text{Yb}_{0.04}\text{CuSeO}$                | 747 | 223.36  | 7336.00   | 0.454  | 0.603 |
| $\text{Ag}_{0.02}\text{Cu}_{1.955}\text{S}_{0.5}\text{Se}_{0.5}$              | 300 | 141.15  | 4191.00   | 0.446  | 0.056 |
| $\text{Rb}_2\text{Bi}_8\text{Se}_{12.9909}\text{Cl}_{0.0091}$                 | 526 | -201.26 | 6176.00   | 0.537  | 0.245 |
| $(\text{Cu}_{0.004}\text{Pb}_{0.996}\text{Te})(\text{MnTe})_{0.03}$           | 523 | -173.33 | 78759.00  | 1.563  | 0.792 |
| $\text{SnSe}_{0.8}\text{S}_{0.2}$                                             | 573 | 319.81  | 2742.00   | 0.785  | 0.205 |

|                                                                                             |     |         |           |       |       |
|---------------------------------------------------------------------------------------------|-----|---------|-----------|-------|-------|
| Ge <sub>0.96</sub> Mn <sub>0.02</sub> Sb <sub>0.02</sub> Te                                 | 773 | 178.90  | 109278.00 | 2.171 | 1.245 |
| Cu <sub>3</sub> Sb <sub>0.9875</sub> Ge <sub>0.0125</sub> S <sub>4</sub>                    | 573 | 424.30  | 1891.00   | 0.809 | 0.241 |
| CrO <sub>0.09</sub> N <sub>0.9</sub>                                                        | 250 | -56.80  | 34457.00  | 4.388 | 0.006 |
| CuAgTe <sub>0.5</sub> Se <sub>0.5</sub>                                                     | 408 | 225.00  | 7361.00   | 0.302 | 0.503 |
| Sn <sub>1.03</sub> Se <sub>0.12</sub> Te <sub>0.865</sub> Br <sub>0.015</sub>               | 823 | 164.50  | 63158.00  | 2.107 | 0.668 |
| Sn <sub>1.03</sub> Se <sub>0.12</sub> Te <sub>0.875</sub> Br <sub>0.005</sub>               | 623 | 120.00  | 145614.00 | 2.597 | 0.458 |
| CuFeS <sub>2</sub>                                                                          | 300 | -361.60 | 5270.00   | 8.425 | 0.025 |
| Cr <sub>1.99</sub> Fe <sub>0.01</sub> Ge <sub>2</sub> Te <sub>6</sub>                       | 416 | 468.04  | 304.69    | 0.780 | 0.036 |
| Sb <sub>2</sub> Si <sub>2</sub> Te <sub>6</sub>                                             | 673 | 213.37  | 13750.00  | 0.500 | 0.843 |
| Cu <sub>3</sub> P <sub>0.6</sub> Ge <sub>0.4</sub> S <sub>4</sub>                           | 350 | 57.00   | 97400.00  | 1.630 | 0.068 |
| In <sub>4</sub> Se <sub>2.32</sub> Cl <sub>0.03</sub>                                       | 423 | -246.15 | 23400.00  | 0.993 | 0.600 |
| Ag <sub>2</sub> Se                                                                          | 362 | -98.24  | 233115.00 | 1.307 | 0.623 |
| ZrNiPb <sub>0.94</sub> Sn <sub>0.4</sub> Bi <sub>0.02</sub>                                 | 303 | -85.24  | 376450.00 | 5.919 | 0.140 |
| Ba <sub>0.10</sub> La <sub>0.05</sub> Yb <sub>0.20</sub> Co <sub>4</sub> Sb <sub>12</sub>   | 300 | -93     | 336700.00 | 1.000 | 0.300 |
| Co <sub>0.97</sub> Ni <sub>0.03</sub> GeTe                                                  | 394 | -94.89  | 84574.00  | 5.840 | 0.051 |
| Mg <sub>0.98</sub> Li <sub>0.02</sub> Ge <sub>0.9</sub> Si <sub>0.1</sub>                   | 675 | 281.20  | 19385.00  | 2.684 | 0.386 |
| Eu <sub>2</sub> Zn <sub>0.96</sub> Sb <sub>2</sub>                                          | 823 | 193.00  | 15340.00  | 0.500 | 0.941 |
| Sb <sub>0.05</sub> Ge <sub>0.95</sub> Te                                                    | 673 | 189.63  | 118349.00 | 2.218 | 1.291 |
| Bi <sub>1.9</sub> Nb <sub>0.1</sub> Te <sub>3</sub>                                         | 426 | -112.53 | 64706.00  | 0.777 | 0.449 |
| Ge <sub>0.55</sub> Pb <sub>0.45</sub> Te <sub>0.3</sub> Se <sub>0.7</sub>                   | 300 | 258.13  | 4955.00   | 0.788 | 0.163 |
| Mg <sub>3.5</sub> Gd <sub>0.03</sub> Sb <sub>1.97</sub> Te <sub>0.03</sub>                  | 700 | -279.58 | 13218.00  | 0.634 | 1.141 |
| Pb <sub>6</sub> Bi <sub>2</sub> Se <sub>9</sub>                                             | 623 | -189.80 | 11769.00  | 1.120 | 0.236 |
| Nd <sub>2.86</sub> Te <sub>4</sub>                                                          | 573 | -68.80  | 114085.00 | 2.000 | 0.151 |
| CrSe <sub>3</sub>                                                                           | 566 | 159.86  | 24786.00  | 1.758 | 0.204 |
| Ag <sub>0.01</sub> Cu <sub>1.965</sub> S <sub>0.5</sub> Se <sub>0.5</sub>                   | 578 | 112.44  | 37426.00  | 0.920 | 0.306 |
| Yb <sub>9</sub> Ca <sub>4</sub> BaMgSb <sub>11</sub>                                        | 700 | 164.00  | 15350.00  | 0.596 | 0.485 |
| Ag <sub>0.6</sub> Sb <sub>0.9</sub> Pb <sub>19.5</sub> Te <sub>19.1</sub>                   | 623 | -200.00 | 22500.00  | 1.666 | 0.337 |
| Cu <sub>2</sub> Se                                                                          | 400 | 166.70  | 40986.00  | 0.200 | 2.278 |
| Ge <sub>0.55</sub> Pb <sub>0.45</sub> Te <sub>0.2</sub> Se <sub>0.8</sub>                   | 569 | 230.00  | 2321.00   | 0.914 | 0.071 |
| Ca <sub>1.18</sub> Yb <sub>3.82</sub> Al <sub>1.84</sub> In <sub>0.16</sub> Sb <sub>6</sub> | 619 | 41.70   | 32600.00  | 2.492 | 0.012 |
| Ag(Bi <sub>0.9</sub> Nb <sub>0.1</sub> ) <sub>0.9</sub> Sb <sub>0.1</sub> Se <sub>2</sub>   | 526 | -181.00 | 11567.00  | 0.628 | 0.317 |
| Mg <sub>2</sub> Cu <sub>3</sub> In <sub>3</sub> Te <sub>8</sub>                             | 427 | 338.30  | 1793.00   | 2.310 | 0.038 |
| Ca <sub>5</sub> In <sub>1.95</sub> Zn <sub>0.05</sub> Sb <sub>6</sub>                       | 622 | 209.00  | 14350.00  | 0.910 | 0.428 |

|                                                                                             |     |         |           |        |       |
|---------------------------------------------------------------------------------------------|-----|---------|-----------|--------|-------|
| Sn <sub>0.985</sub> In <sub>0.015</sub> Te                                                  | 523 | 75.99   | 316854.00 | 5.056  | 0.189 |
| Yb <sub>0.12</sub> Co <sub>4</sub> Sb <sub>12.11</sub>                                      | 800 | -220    | 68000.00  | 1.600  | 1.000 |
| Sb <sub>0.1</sub> Ge <sub>0.9</sub> Te                                                      | 673 | 240.00  | 60550.00  | 1.454  | 1.592 |
| Cu <sub>3.0</sub> SbSe <sub>4</sub>                                                         | 548 | 369.00  | 5150.00   | 1.200  | 0.320 |
| LiCoO <sub>2</sub>                                                                          | 823 | 788.97  | 13.74     | 3.318  | 0.002 |
| Sr <sub>14.5</sub> Ga <sub>29.2</sub> Ge <sub>56.3</sub>                                    | 774 | -166.67 | 40300.00  | 1.754  | 0.494 |
| LiCo <sub>0.96</sub> Ni <sub>0.04</sub> O <sub>2</sub>                                      | 823 | 718.62  | 17.78     | 1.579  | 0.005 |
| NbCoSn <sub>0.9</sub> Sb <sub>0.1</sub>                                                     | 430 | -99.62  | 140000.00 | 6.177  | 0.097 |
| Sn <sub>0.91</sub> Mn <sub>0.08</sub> Bi <sub>0.01</sub> Te                                 | 523 | 88.00   | 216000.00 | 3.785  | 0.231 |
| Ge <sub>0.6</sub> Sb <sub>0.2</sub> Te <sub>0.8</sub> (AgSnSe <sub>2</sub> ) <sub>0.2</sub> | 523 | 187.00  | 42600.00  | 0.805  | 1.011 |
| Sn <sub>0.96</sub> Pb <sub>0.01</sub> Cd <sub>0.035</sub> Se                                | 673 | 408.00  | 2048.00   | 0.338  | 0.679 |
| Sn <sub>1.03</sub> Se <sub>0.12</sub> Te <sub>0.875</sub> Br <sub>0.005</sub>               | 523 | 62.93   | 256140.00 | 3.340  | 0.148 |
| Rb <sub>2</sub> Bi <sub>8</sub> Se <sub>12.9935</sub> Cl <sub>0.0065</sub>                  | 526 | -269.69 | 3676.00   | 0.477  | 0.295 |
| Cu <sub>2.88</sub> Ag <sub>0.12</sub> SbSe <sub>4</sub>                                     | 498 | 400.00  | 6447.00   | 1.040  | 0.500 |
| FeNb <sub>0.92</sub> Hf <sub>0.08</sub> Sb                                                  | 700 | 205.40  | 132600.00 | 5.626  | 0.696 |
| YbSi <sub>2</sub>                                                                           | 522 | -36.70  | 620500.00 | 10.400 | 0.042 |
| Ca <sub>14</sub> MgSb <sub>11</sub>                                                         | 600 | 130.00  | 5400.00   | 0.665  | 0.082 |
| Yb <sub>13.44</sub> Ce <sub>0.4</sub> Mn <sub>1.09</sub> Sb <sub>11.07</sub>                | 973 | 215.00  | 11800.00  | 0.645  | 0.823 |
| Ba <sub>8</sub> Cu <sub>5</sub> Si <sub>25</sub> Ge <sub>16</sub>                           | 661 | -102.50 | 78400.00  | 1.910  | 0.284 |
| Cu <sub>2</sub> Sn <sub>0.95</sub> Zn <sub>0.05</sub> S <sub>3</sub>                        | 623 | 173.00  | 11800.00  | 0.762  | 0.289 |
| Ba <sub>8.02</sub> Cu <sub>5.04</sub> Si <sub>6</sub> Ge <sub>34.93</sub>                   | 566 | -107.00 | 60700.00  | 1.400  | 0.282 |
| BaBiTe <sub>3</sub>                                                                         | 598 | -183.60 | 8515.00   | 0.430  | 0.399 |
| Rb <sub>2</sub> Bi <sub>8</sub> Se <sub>12.9935</sub> Cl <sub>0.0065</sub>                  | 330 | -199.25 | 9559.00   | 0.622  | 0.201 |
| (Sn <sub>0.8</sub> Ge <sub>0.2</sub> ) <sub>0.88</sub> Mn <sub>0.12</sub> Te                | 298 | 50.00   | 226695.00 | 2.559  | 0.066 |
| Gd <sub>2.79</sub> Se <sub>4</sub>                                                          | 650 | -122.00 | 18170.00  | 1.264  | 0.139 |
| (SnTe) <sub>0.94</sub> (CuSbTe <sub>2</sub> ) <sub>0.06</sub>                               | 320 | 30.20   | 406300.00 | 4.435  | 0.027 |
| Ca <sub>1.11</sub> Yb <sub>3.89</sub> Al <sub>2</sub> Sb <sub>5.77</sub> Ge <sub>0.23</sub> | 373 | 39.00   | 19346.00  | 2.274  | 0.005 |
| Ca <sub>1.14</sub> Yb <sub>3.86</sub> Al <sub>1.68</sub> In <sub>0.32</sub> Sb <sub>6</sub> | 579 | 185.64  | 5305.00   | 0.917  | 0.115 |
| Ag <sub>2.0</sub> Se <sub>0.6</sub> Te <sub>0.4</sub>                                       | 360 | -113.00 | 79266.00  | 0.737  | 0.494 |
| BiSbSe <sub>2.88</sub> Cl <sub>0.12</sub>                                                   | 700 | -289.00 | 3615.00   | 0.416  | 0.508 |
| In <sub>0.005</sub> Pb <sub>0.995</sub> Te <sub>0.999</sub> l <sub>0.001</sub>              | 378 | -254.72 | 23016.00  | 1.734  | 0.322 |
| Ge <sub>4</sub> Sb <sub>2</sub> Te <sub>7</sub>                                             | 523 | 83.40   | 117780.00 | 1.888  | 0.227 |
| Cu <sub>2.7</sub> Ag <sub>0.3</sub> ErTe <sub>3</sub>                                       | 300 | 41.40   | 271000.00 | 2.350  | 0.059 |

|                                                                              |     |         |           |       |       |
|------------------------------------------------------------------------------|-----|---------|-----------|-------|-------|
| Nd <sub>2.78</sub> Te <sub>4</sub>                                           | 773 | -147.40 | 40750.00  | 1.132 | 0.605 |
| Ge <sub>0.55</sub> Pb <sub>0.45</sub> Te <sub>0.3</sub> Se <sub>0.7</sub>    | 370 | 271.88  | 5288.00   | 0.666 | 0.275 |
| Ge <sub>0.89</sub> In <sub>0.05</sub> Pb <sub>0.06</sub> Te                  | 375 | 152.94  | 58081.00  | 1.247 | 0.409 |
| CaZn <sub>0.4</sub> Ag <sub>0.2</sub> Sb                                     | 673 | 136.20  | 40373.00  | 0.853 | 0.591 |
| ZrNiPb <sub>0.993</sub> Bi <sub>0.007</sub>                                  | 771 | -210.20 | 96296.00  | 6.314 | 0.520 |
| Cu <sub>1.95</sub> S <sub>0.5</sub> Se <sub>0.5</sub>                        | 475 | 73.54   | 49010.00  | 1.267 | 0.099 |
| Rb <sub>2</sub> Bi <sub>8</sub> Se <sub>12.9909</sub> Cl <sub>0.0091</sub>   | 724 | -195.30 | 7500.00   | 0.521 | 0.398 |
| La <sub>0.15</sub> Ca <sub>0.85</sub> TiO <sub>3</sub>                       | 432 | -86.00  | 115100.00 | 3.850 | 0.105 |
| (SnTe) <sub>15</sub> Sb <sub>2</sub> Te <sub>3</sub>                         | 723 | 156.92  | 93924.00  | 2.110 | 0.792 |
| Cu <sub>7</sub> PS <sub>6</sub>                                              | 523 | 223.21  | 142.00    | 0.156 | 0.024 |
| Mo <sub>3</sub> Sb <sub>7</sub> l <sub>0.75</sub>                            | 723 | 45.50   | 447150.00 | 6.490 | 0.103 |
| YbCd <sub>1.6</sub> Zn <sub>0.4</sub> Sb <sub>2</sub>                        | 450 | 155.05  | 67582.00  | 1.477 | 0.540 |
| SnTe <sub>0.2</sub> AgSbSe <sub>2</sub>                                      | 300 | 64.00   | 125000.00 | 1.285 | 0.131 |
| Cu <sub>2</sub> CdSnSe <sub>4</sub>                                          | 650 | 285.70  | 3328.00   | 1.122 | 0.157 |
| In <sub>4</sub> Se <sub>2.67</sub> Cl <sub>0.03</sub>                        | 623 | -202.75 | 30451.00  | 0.612 | 1.274 |
| SnTe                                                                         | 873 | 90.00   | 162500.00 | 3.602 | 0.318 |
| Eu <sub>0.10</sub> Co <sub>4</sub> Sb <sub>12</sub>                          | 850 | -217    | 50000.00  | 2.200 | 0.700 |
| (Sn <sub>0.8</sub> Ge <sub>0.2</sub> ) <sub>0.97</sub> Mn <sub>0.03</sub> Te | 573 | 82.00   | 203400.00 | 2.984 | 0.260 |
| MgAgSb                                                                       | 500 | 199.10  | 42000.00  | 1.010 | 0.824 |
| Cu <sub>2</sub> ZnSn <sub>0.95</sub> Ag <sub>0.05</sub> Se <sub>4</sub>      | 373 | 38.87   | 238462.00 | 3.526 | 0.038 |
| Ag <sub>3.9</sub> Mo <sub>9</sub> Se <sub>11</sub>                           | 350 | 98.00   | 30250.00  | 0.780 | 0.130 |
| Nb <sub>0.75</sub> Ta <sub>0.25</sub> CoSn <sub>0.9</sub> Sb <sub>0.1</sub>  | 530 | -134.04 | 105957.00 | 4.345 | 0.232 |
| GeSe <sub>0.6</sub> Te <sub>0.4</sub>                                        | 530 | 94.00   | 133209.00 | 2.110 | 0.296 |
| Sr <sub>14.7</sub> Ga <sub>28.7</sub> Ge <sub>56.6</sub>                     | 666 | -133.60 | 66427.00  | 1.532 | 0.515 |
| Eu <sub>14</sub> MgBi <sub>11</sub>                                          | 817 | 84.85   | 48344.00  | 1.629 | 0.175 |
| Mg <sub>1.98</sub> Li <sub>0.02</sub> Zn <sub>0.98</sub> Sb <sub>2</sub>     | 673 | 146.03  | 45820.00  | 0.993 | 0.662 |
| Ag <sub>1.2</sub> Sb <sub>0.8</sub> Pb <sub>14.9</sub> Te <sub>22.7</sub>    | 523 | 280.00  | 1583.00   | 1.010 | 0.064 |
| CuAgTe <sub>0.5</sub> Se <sub>0.5</sub>                                      | 422 | 211.41  | 5482.00   | 0.306 | 0.338 |
| Ag <sub>0.04</sub> Cr <sub>1.96</sub> Se <sub>3</sub>                        | 619 | 152.11  | 26738.00  | 1.509 | 0.254 |
| Mg <sub>2.994</sub> Na <sub>0.006</sub> Sb <sub>2</sub>                      | 468 | 164.00  | 17660.00  | 1.156 | 0.192 |
| BiCuSeO                                                                      | 446 | 140.13  | 5598.00   | 0.545 | 0.090 |
| (PbTe) <sub>0.1</sub> (Ag <sub>2</sub> Te) <sub>0.9</sub>                    | 550 | -159.40 | 27150.00  | 0.532 | 0.713 |
| Tl <sub>0.8</sub> Co <sub>4</sub> SnSb <sub>11</sub>                         | 100 | 4.05    | 114773.00 | 2.580 | 0.000 |



|                                                                                |     |         |           |       |       |
|--------------------------------------------------------------------------------|-----|---------|-----------|-------|-------|
| Mg <sub>3.5</sub> Ho <sub>0.02</sub> Sb <sub>2</sub>                           | 400 | -250.00 | 11744.00  | 1.066 | 0.275 |
| Ca <sub>0.15</sub> BaGd <sub>1.85</sub> NiO <sub>5</sub>                       | 716 | 175.74  | 271.33    | 1.855 | 0.003 |
| Cu <sub>2</sub> Sn <sub>0.95</sub> Fe <sub>0.05</sub> Se <sub>3</sub>          | 723 | 112.15  | 70608.00  | 1.929 | 0.333 |
| Eu <sub>2</sub> ZnSb <sub>2</sub>                                              | 823 | 220.00  | 6600.00   | 0.470 | 0.559 |
| Ba <sub>0.08</sub> Yb <sub>0.09</sub> Co <sub>4</sub> Sb <sub>12</sub>         | 400 | -145.00 | 172340.00 | 2.530 | 0.570 |
| MgAgSb <sub>0.985</sub> In <sub>0.015</sub>                                    | 550 | 165.45  | 96036.00  | 1.673 | 0.864 |
| Bi <sub>0.95</sub> Ba <sub>0.05</sub> CuSeO                                    | 420 | 252.00  | 5000.00   | 0.767 | 0.174 |
| (Cu <sub>0.001</sub> Pb <sub>0.999</sub> Te)(MnTe) <sub>0.03</sub>             | 623 | -228.25 | 37397.00  | 1.251 | 0.970 |
| Cu <sub>1.85</sub> Se                                                          | 784 | 73.30   | 176923.00 | 3.393 | 0.220 |
| Ca <sub>1.58</sub> Yb <sub>3.42</sub> Al <sub>2</sub> Sb <sub>6</sub>          | 515 | 37.57   | 21726.00  | 3.600 | 0.004 |
| Ba <sub>0.15</sub> Yb <sub>0.01</sub> Co <sub>4</sub> Sb <sub>12</sub>         | 800 | -190.34 | 100000.00 | 3.549 | 0.822 |
| V <sub>0.855</sub> Ti <sub>0.1</sub> CoSb                                      | 300 | -57.90  | 209370.00 | 2.200 | 0.060 |
| Rb <sub>2</sub> Bi <sub>8</sub> Se <sub>12.9805</sub> Cl <sub>0.0195</sub>     | 330 | -112.70 | 21029.00  | 0.800 | 0.110 |
| Ag <sub>2.0</sub> Se <sub>0.5</sub> Te <sub>0.5</sub>                          | 360 | -101.00 | 64587.00  | 0.667 | 0.356 |
| Mg <sub>3.5</sub> Ho <sub>0.01</sub> Sb <sub>1.97</sub> Te <sub>0.03</sub>     | 400 | -233.80 | 17869.00  | 0.989 | 0.395 |
| Ag <sub>0.01</sub> Sn <sub>0.99</sub> Se <sub>0.8</sub> S <sub>0.2</sub>       | 518 | 405.98  | 558.00    | 0.158 | 0.302 |
| Sn <sub>0.97</sub> Pb <sub>0.02</sub> Zn <sub>0.01</sub> Se                    | 373 | 459.64  | 2795.00   | 1.075 | 0.205 |
| Bi <sub>0.92</sub> Pb <sub>0.04</sub> Yb <sub>0.04</sub> CuSeO                 | 847 | 232.00  | 6400.00   | 0.425 | 0.687 |
| In <sub>0.005</sub> Pb <sub>0.995</sub> Te <sub>0.996</sub> l <sub>0.004</sub> | 533 | -208.90 | 34000.00  | 1.548 | 0.511 |
| CuAgTe <sub>0.7</sub> Se <sub>0.3</sub>                                        | 397 | 258.97  | 6982.00   | 0.230 | 0.810 |
| BiSb(Se <sub>0.94</sub> Br <sub>0.06</sub> ) <sub>3</sub>                      | 300 | -112.00 | 26117.00  | 0.640 | 0.154 |
| Zn <sub>0.9</sub> Cd <sub>0.1</sub> Sc <sub>0.01</sub> O <sub>1.015</sub>      | 573 | -101.00 | 49000.00  | 4.940 | 0.058 |
| ZrNiPb <sub>0.9</sub> Sn <sub>0.8</sub> Bi <sub>0.02</sub>                     | 475 | -154.30 | 161842.00 | 5.870 | 0.312 |
| Cu <sub>11.5</sub> Gd <sub>0.5</sub> Sb <sub>4</sub> S <sub>13</sub>           | 525 | 111.14  | 86937.00  | 1.418 | 0.398 |
| Gd <sub>0.04</sub> Co <sub>4</sub> Sb <sub>12</sub>                            | 800 | -222    | 46200.00  | 3.100 | 0.500 |
| Mg <sub>3.5</sub> Ho <sub>0.02</sub> Sb <sub>1.97</sub> Te <sub>0.03</sub>     | 400 | -225.00 | 22442.00  | 0.982 | 0.463 |
| MgAgSb <sub>0.995</sub> In <sub>0.005</sub>                                    | 300 | 163.10  | 64685.00  | 1.229 | 0.438 |
| Ag <sub>0.03</sub> Cr <sub>1.97</sub> Se <sub>3</sub>                          | 566 | 148.40  | 28400.00  | 1.506 | 0.235 |
| GeSe <sub>0.8</sub> Te <sub>0.2</sub>                                          | 776 | 121.40  | 43284.00  | 1.250 | 0.396 |
| Bi <sub>0.96</sub> Ag <sub>0.04</sub> CuSeO                                    | 423 | 267.80  | 1477.00   | 0.538 | 0.083 |
| Ag <sub>0.94</sub> CuSe                                                        | 470 | 112.10  | 44930.00  | 1.241 | 0.257 |
| Rb <sub>2</sub> Bi <sub>8</sub> Se <sub>12.909</sub>                           | 526 | -184.00 | 7600.00   | 0.655 | 0.207 |
| Mg <sub>2</sub> ZnSb <sub>2</sub>                                              | 673 | 104.64  | 5629.00   | 1.026 | 0.040 |

|                                                                                     |      |         |           |       |       |
|-------------------------------------------------------------------------------------|------|---------|-----------|-------|-------|
| CuAgTe <sub>0.7</sub> Se <sub>0.3</sub>                                             | 383  | 263.32  | 7566.00   | 0.278 | 0.724 |
| Ca <sub>11</sub> Sb <sub>10</sub>                                                   | 419  | 15.85   | 2165.00   | 0.831 | 0.000 |
| Ag <sub>0.01</sub> Sn <sub>0.99</sub> Se <sub>0.9</sub> S <sub>0.1</sub>            | 616  | 432.05  | 596.00    | 0.212 | 0.323 |
| Cu <sub>1.99</sub> In <sub>0.01</sub> Se                                            | 295  | 89.11   | 125700.00 | 0.825 | 0.357 |
| (CaZn <sub>0.4</sub> Ag <sub>0.2</sub> Sb) <sub>0.83</sub> (LiZnSb) <sub>0.17</sub> | 573  | 163.88  | 26694.00  | 0.717 | 0.573 |
| Yb <sub>10</sub> LaCdSb <sub>9</sub>                                                | 1023 | 57.74   | 38935.00  | 1.593 | 0.083 |
| AgBi <sub>0.98</sub> Pb <sub>0.02</sub> Se <sub>2.12</sub>                          | 350  | 493.40  | 696.00    | 0.527 | 0.113 |
| Mg <sub>2</sub> Zn <sub>0.98</sub> Sb <sub>2</sub>                                  | 773  | 186.20  | 18618.00  | 0.966 | 0.517 |
| Tl <sub>0.8</sub> Co <sub>4</sub> SnSb <sub>11</sub>                                | 150  | 6.76    | 107447.00 | 2.224 | 0.000 |
| As <sub>2</sub> Te <sub>3</sub>                                                     | 323  | 79.21   | 309.79    | 0.796 | 0.001 |
| Ca <sub>3</sub> Co <sub>4</sub> O <sub>9</sub>                                      | 500  | 136.40  | 6826.00   | 2.600 | 0.024 |
| GeSe <sub>0.5</sub> Te <sub>0.5</sub>                                               | 320  | 46.42   | 241791.00 | 2.956 | 0.056 |
| Cu <sub>2.1</sub> Cd <sub>0.9</sub> SnSe <sub>4</sub>                               | 600  | 148.00  | 21900.00  | 0.720 | 0.400 |
| Ca <sub>5</sub> Ga <sub>2</sub> Sb <sub>6</sub>                                     | 425  | 417.34  | 640.00    | 1.095 | 0.043 |
| Ag <sub>0.6</sub> Sb <sub>0.9</sub> Pb <sub>19.5</sub> Te <sub>19.1</sub>           | 573  | -190.40 | 13350.00  | 1.654 | 0.160 |
| MgAgSb <sub>0.995</sub> In <sub>0.005</sub>                                         | 550  | 182.73  | 54000.00  | 1.115 | 0.907 |
| MgAgSb <sub>0.99</sub> In <sub>0.01</sub>                                           | 450  | 200.72  | 51636.00  | 1.013 | 0.933 |
| Mg <sub>3.5</sub> Ho <sub>0.01</sub> Sb <sub>2</sub>                                | 600  | -296.80 | 2308.00   | 0.768 | 0.159 |
| CuFeS <sub>2</sub>                                                                  | 390  | -359.00 | 5143.00   | 5.787 | 0.045 |
| Sm <sub>0.2</sub> Bi <sub>1.8</sub> Te <sub>3</sub>                                 | 473  | -155.80 | 55600.00  | 0.736 | 0.867 |
| ZrNiPb <sub>0.995</sub> Bi <sub>0.005</sub>                                         | 475  | -209.00 | 101910.00 | 7.124 | 0.297 |
| Cu <sub>2</sub> Sn <sub>0.9</sub> Zn <sub>0.1</sub> S <sub>3</sub>                  | 523  | 107.30  | 41643.00  | 1.368 | 0.183 |
| Ag <sub>3.9</sub> Mo <sub>9</sub> Se <sub>11</sub>                                  | 447  | 124.60  | 25285.00  | 0.770 | 0.228 |
| Sb <sub>0.1</sub> Ge <sub>0.9</sub> Te                                              | 823  | 236.30  | 60550.00  | 1.653 | 1.697 |
| (Sn <sub>0.985</sub> In <sub>0.015</sub> Te) <sub>0.95</sub> (AgCl) <sub>0.05</sub> | 723  | 106.81  | 222472.00 | 3.633 | 0.505 |
| CaZn <sub>0.4</sub> Ag <sub>0.2</sub> Sb                                            | 371  | 74.78   | 101563.00 | 1.164 | 0.181 |
| Yb <sub>13.49</sub> Ce <sub>0.39</sub> Mn <sub>1.05</sub> Sb <sub>11.08</sub>       | 873  | 191.00  | 15850.00  | 0.677 | 0.746 |
| CrSe <sub>3</sub>                                                                   | 512  | 149.00  | 27350.00  | 1.752 | 0.177 |
| Ca <sub>3</sub> Co <sub>3.7</sub> Ti <sub>0.3</sub> O <sub>9</sub>                  | 900  | 276.30  | 5920.00   | 1.890 | 0.215 |
| Sr <sub>14.7</sub> Ga <sub>28.7</sub> Ge <sub>56.6</sub>                            | 563  | -124.00 | 78042.00  | 1.742 | 0.388 |
| SnS                                                                                 | 600  | 653.00  | 17.00     | 0.790 | 0.006 |
| CuAgTe <sub>0.7</sub> Se <sub>0.3</sub>                                             | 349  | 248.64  | 9234.00   | 0.354 | 0.563 |
| SnTe <sub>0.1</sub> AgSbSe <sub>2</sub>                                             | 400  | 70.80   | 170400.00 | 2.443 | 0.140 |

|                                                                                             |      |         |           |        |       |
|---------------------------------------------------------------------------------------------|------|---------|-----------|--------|-------|
| Ba <sub>8.01</sub> Ga <sub>15.89</sub> Zn <sub>0.006</sub> Sn <sub>30.1</sub>               | 380  | 374.30  | 12700.00  | 0.896  | 0.755 |
| Mo <sub>3</sub> Sb <sub>7</sub> I <sub>1.25</sub>                                           | 323  | 21.20   | 571800.00 | 4.704  | 0.018 |
| AgSb <sub>0.99</sub> Mn <sub>0.01</sub> Te <sub>2</sub>                                     | 444  | 123.86  | 40933.00  | 0.952  | 0.293 |
| Ba <sub>8.04</sub> Cu <sub>4.99</sub> Si <sub>18</sub> Ge <sub>22.98</sub>                  | 417  | -154.00 | 28650.00  | 1.300  | 0.218 |
| Cu <sub>5.133</sub> Sn <sub>1.866</sub> S <sub>6.3</sub> Cl <sub>0.7</sub>                  | 327  | 61.93   | 82784.00  | 2.000  | 0.052 |
| Mg <sub>3.07</sub> Sb <sub>1.5</sub> Bi <sub>0.46</sub> Se <sub>0.04</sub>                  | 300  | -281.52 | 7346.00   | 0.740  | 0.236 |
| AgBiSe <sub>2.0</sub>                                                                       | 675  | -251.00 | 4040.00   | 0.460  | 0.373 |
| Cu <sub>7</sub> P(S <sub>0.6</sub> Se <sub>0.4</sub> ) <sub>6</sub>                         | 422  | 313.10  | 687.00    | 0.210  | 0.135 |
| In <sub>0.075</sub> Co <sub>4</sub> Sb <sub>11.975</sub>                                    | 300  | -237    | 44000.00  | 3.500  | 0.200 |
| Cu <sub>2</sub> ZnSn <sub>0.98</sub> Ag <sub>0.02</sub> Se <sub>4</sub>                     | 573  | 113.52  | 44034.00  | 3.175  | 0.102 |
| Yb <sub>7</sub> Ca <sub>6</sub> BaMgSb <sub>11</sub>                                        | 1100 | 223.80  | 11200.00  | 0.675  | 0.914 |
| Ba <sub>0.9</sub> K <sub>0.1</sub> Zn <sub>2</sub> As <sub>2</sub>                          | 523  | 51.85   | 128000.00 | 3.180  | 0.057 |
| Ag(Bi <sub>0.8</sub> Nb <sub>0.2</sub> ) <sub>0.9</sub> Sb <sub>0.1</sub> Se <sub>2</sub>   | 478  | -142.00 | 20706.00  | 0.629  | 0.317 |
| Cu <sub>11.5</sub> Gd <sub>0.5</sub> Sb <sub>4</sub> S <sub>13</sub>                        | 327  | 84.72   | 89851.00  | 1.386  | 0.152 |
| Ca <sub>9</sub> Yb <sub>2</sub> Sb <sub>7</sub> Ge <sub>3</sub>                             | 701  | 78.07   | 825.00    | 1.116  | 0.004 |
| Cu <sub>0.98</sub> Pd <sub>0.02</sub> FeS <sub>2</sub>                                      | 70   | -76.33  | 7880.00   | 17.160 | 0.000 |
| Ag(Bi <sub>0.85</sub> Pb <sub>0.15</sub> ) <sub>0.9</sub> Sb <sub>0.1</sub> Se <sub>2</sub> | 526  | 400.00  | 464.00    | 0.427  | 0.091 |
| Ag <sub>2</sub> Se                                                                          | 334  | -117.04 | 172131.00 | 1.137  | 0.700 |
| (Sn <sub>0.985</sub> In <sub>0.015</sub> Te) <sub>0.95</sub> (AgCl) <sub>0.05</sub>         | 623  | 92.46   | 278652.00 | 4.034  | 0.368 |
| Cu <sub>3</sub> Sb <sub>0.996</sub> In <sub>0.004</sub> Se <sub>4</sub>                     | 423  | 276.20  | 6600.00   | 1.704  | 0.125 |
| Sr <sub>0.21</sub> Co <sub>4</sub> Sb <sub>12.25</sub>                                      | 550  | -170.00 | 155000.00 | 3.800  | 0.648 |
| Nb <sub>0.9</sub> Ta <sub>0.1</sub> CoSn <sub>0.9</sub> Sb <sub>0.1</sub>                   | 530  | -125.77 | 121135.00 | 4.809  | 0.211 |
| Cu <sub>1.9</sub> Ag <sub>0.1</sub> SnSe <sub>3</sub>                                       | 300  | 116.67  | 5143.00   | 1.187  | 0.018 |
| Sn <sub>0.93</sub> Pb <sub>0.06</sub> Zn <sub>0.01</sub> Se                                 | 373  | 498.21  | 1137.00   | 0.708  | 0.162 |
| Li <sub>0.03</sub> Cu <sub>1.82</sub> Bi <sub>0.03</sub> Se                                 | 504  | 56.75   | 139080.00 | 1.652  | 0.137 |
| Cu <sub>12</sub> Sb <sub>4</sub> S <sub>13</sub>                                            | 322  | 95.52   | 14111.00  | 0.492  | 0.083 |
| Bi <sub>0.42</sub> Sb <sub>1.58</sub> Te <sub>3</sub>                                       | 373  | 240.00  | 38600.00  | 0.920  | 0.901 |
| Cu <sub>2</sub> Se <sub>0.88</sub> S <sub>0.12</sub>                                        | 353  | 127.30  | 50900.00  | 0.474  | 0.611 |
| In <sub>0.005</sub> Pb <sub>0.995</sub> Te <sub>0.999</sub> I <sub>0.001</sub>              | 481  | -268.50 | 16000.00  | 1.473  | 0.377 |
| (Cu <sub>0.004</sub> Pb <sub>0.996</sub> Te)(MnTe) <sub>0.03</sub>                          | 623  | -146.14 | 90959.00  | 1.675  | 0.723 |
| Cu <sub>2</sub> S <sub>0.5</sub> Se <sub>0.5</sub>                                          | 673  | 260.20  | 8168.00   | 0.741  | 0.502 |
| BiSb(Se <sub>0.92</sub> Br <sub>0.08</sub> ) <sub>3</sub>                                   | 300  | -110.00 | 27766.00  | 0.630  | 0.160 |
| La <sub>0.5</sub> Co <sub>4</sub> Sb <sub>12</sub>                                          | 673  | 100.00  | 28283.00  | 2.706  | 0.070 |

|                                                                                               |      |         |           |       |       |
|-----------------------------------------------------------------------------------------------|------|---------|-----------|-------|-------|
| Ag <sub>2</sub> Se <sub>1.06</sub>                                                            | 334  | -141.20 | 119016.00 | 0.996 | 0.796 |
| Mg <sub>2</sub> Zn <sub>0.98</sub> Sb <sub>2</sub>                                            | 573  | 241.50  | 7649.00   | 0.740 | 0.351 |
| Cu <sub>5</sub> SnSbSe <sub>6.3</sub>                                                         | 300  | 37.47   | 185345.00 | 2.741 | 0.028 |
| Eu(Zn <sub>0.5</sub> Cd <sub>0.5</sub> ) <sub>2</sub> Sb <sub>2</sub>                         | 400  | 204.00  | 26235.00  | 1.300 | 0.336 |
| Bi <sub>0.92</sub> Pb <sub>0.04</sub> Yb <sub>0.04</sub> CuSeO                                | 548  | 182.57  | 11034.00  | 0.566 | 0.356 |
| Ca <sub>1.11</sub> Yb <sub>3.89</sub> Al <sub>2</sub> Sb <sub>5.77</sub> Ge <sub>0.23</sub>   | 422  | 44.81   | 17944.00  | 2.193 | 0.007 |
| Cu <sub>5</sub> Sn <sub>2</sub> S <sub>6.65</sub> Cl <sub>0.35</sub>                          | 667  | 101.99  | 81884.00  | 1.738 | 0.327 |
| Co <sub>4</sub> Sb <sub>11.46</sub> Te <sub>0.43</sub>                                        | 300  | -120    | 168000.00 | 3.900 | 0.200 |
| Pb <sub>0.99</sub> Na <sub>0.01</sub> Te                                                      | 597  | 222.88  | 50935.00  | 1.356 | 1.114 |
| Cu <sub>2.82</sub> Ag <sub>0.18</sub> SbSe <sub>4</sub>                                       | 348  | 363.00  | 9378.00   | 1.380 | 0.312 |
| Yb <sub>13.6</sub> Ce <sub>0.363</sub> Mn <sub>0.99</sub> Sb <sub>11.05</sub>                 | 773  | 161.59  | 21627.00  | 0.784 | 0.557 |
| Cu <sub>1.99</sub> S <sub>0.5</sub> Se <sub>0.5</sub>                                         | 673  | 220.00  | 15000.00  | 0.678 | 0.721 |
| Cu <sub>5.133</sub> Sn <sub>1.866</sub> S <sub>6.65</sub> Cl <sub>0.35</sub>                  | 515  | 86.93   | 97414.00  | 1.688 | 0.225 |
| Tl <sub>4</sub> SnTe <sub>3</sub>                                                             | 323  | 126.00  | 28700.00  | 0.520 | 0.272 |
| Sn <sub>0.93</sub> Pb <sub>0.06</sub> Zn <sub>0.01</sub> Se                                   | 300  | 473.39  | 1500.00   | 0.854 | 0.134 |
| Ca <sub>0.05</sub> BaGd <sub>1.95</sub> NiO <sub>5</sub>                                      | 736  | 226.47  | 65.90     | 1.568 | 0.002 |
| Ge <sub>0.83</sub> In <sub>0.05</sub> Pb <sub>0.12</sub> Te                                   | 475  | 253.78  | 18489.00  | 0.953 | 0.593 |
| (SnTe) <sub>0.9</sub> (CuSbTe <sub>2</sub> ) <sub>0.1</sub>                                   | 525  | 79.67   | 186056.00 | 3.105 | 0.200 |
| Bi <sub>0.42</sub> Sb <sub>1.58</sub> Te <sub>3</sub>                                         | 523  | 189.21  | 26064.00  | 1.320 | 0.370 |
| Ba <sub>0.15</sub> Yb <sub>0.01</sub> Co <sub>4</sub> Sb <sub>12</sub>                        | 500  | -165.00 | 127500.00 | 3.820 | 0.445 |
| Mn <sub>2</sub> Cu <sub>3</sub> In <sub>3</sub> Te <sub>8</sub>                               | 575  | 447.00  | 170.00    | 1.206 | 0.016 |
| Ge <sub>0.55</sub> Sb <sub>0.25</sub> Te <sub>0.8</sub> (AgSnSe <sub>2</sub> ) <sub>0.2</sub> | 423  | 189.00  | 33548.00  | 0.757 | 0.670 |
| Ca <sub>5</sub> Ga <sub>1.7</sub> Zn <sub>0.3</sub> Sb <sub>6</sub>                           | 724  | 102.30  | 43500.00  | 1.340 | 0.246 |
| CrO <sub>0.09</sub> N <sub>0.9</sub>                                                          | 50   | -23.46  | 11616.00  | 1.220 | 0.000 |
| (Zn <sub>0.95</sub> In <sub>0.05</sub> ) <sub>4</sub> Sb <sub>3</sub>                         | 448  | 177.30  | 23100.00  | 0.810 | 0.402 |
| Eu <sub>0.19</sub> Co <sub>4</sub> Sb <sub>12</sub>                                           | 300  | -118    | 152500.00 | 3.300 | 0.200 |
| MgAgSb <sub>0.985</sub> In <sub>0.015</sub>                                                   | 450  | 186.18  | 67207.00  | 1.275 | 0.822 |
| Nb <sub>0.95</sub> Ta <sub>0.05</sub> CoSn <sub>0.9</sub> Sb <sub>0.1</sub>                   | 728  | -145.14 | 106099.00 | 4.552 | 0.357 |
| Ce <sub>0.75</sub> Fe <sub>3</sub> CoSb <sub>12</sub>                                         | 603  | 95.40   | 97073.00  | 6.049 | 0.088 |
| Zn <sub>0.9</sub> Cd <sub>0.1</sub> Sc <sub>0.03</sub> O <sub>1.045</sub>                     | 1173 | -159.46 | 25000.00  | 2.760 | 0.270 |
| Tl <sub>0.1</sub> Co <sub>4</sub> Sb <sub>12</sub>                                            | 50   | -32.77  | 224444.00 | 4.120 | 0.003 |
| Al <sub>0.03</sub> Ge <sub>0.97</sub> Te                                                      | 773  | 129.11  | 205357.00 | 3.350 | 0.768 |
| (PbTe)(MnTe) <sub>0.03</sub>                                                                  | 423  | -212.30 | 58483.00  | 1.632 | 0.683 |

|                                                                                             |     |         |           |       |       |
|---------------------------------------------------------------------------------------------|-----|---------|-----------|-------|-------|
| AgBi <sub>0.96</sub> Pb <sub>0.04</sub> Se <sub>2.12</sub>                                  | 400 | 358.44  | 4756.00   | 0.609 | 0.401 |
| Cu <sub>7</sub> P(S <sub>0.6</sub> Se <sub>0.4</sub> ) <sub>6</sub>                         | 673 | 293.30  | 2220.00   | 0.204 | 0.630 |
| Ca <sub>1.14</sub> Yb <sub>3.86</sub> Al <sub>1.68</sub> In <sub>0.32</sub> Sb <sub>6</sub> | 528 | 187.02  | 5610.00   | 0.908 | 0.114 |
| Ag(Bi <sub>0.9</sub> Pb <sub>0.1</sub> ) <sub>0.9</sub> Sb <sub>0.1</sub> Se <sub>2</sub>   | 576 | 366.67  | 355.86    | 0.429 | 0.064 |
| Cu <sub>3.0</sub> SbSe <sub>4</sub>                                                         | 573 | 356.00  | 5890.00   | 1.120 | 0.382 |
| Sn <sub>0.97</sub> Pb <sub>0.01</sub> Cd <sub>0.025</sub> Se                                | 573 | 395.67  | 2079.00   | 0.564 | 0.331 |
| Ge <sub>0.6</sub> Sb <sub>0.2</sub> Te <sub>0.8</sub> (AgSnSe <sub>2</sub> ) <sub>0.2</sub> | 623 | 197.52  | 38710.00  | 0.786 | 1.282 |
| Er <sub>0.03</sub> (Bi <sub>0.23</sub> Sb <sub>0.77</sub> ) <sub>1.97</sub> Te <sub>3</sub> | 500 | 196.90  | 31600.00  | 1.122 | 0.546 |
| Cu <sub>7</sub> P(S <sub>0.25</sub> Se <sub>0.75</sub> ) <sub>6</sub>                       | 623 | 221.90  | 6234.00   | 0.319 | 0.600 |
| Rb <sub>2</sub> Bi <sub>8</sub> Se <sub>12.974</sub> Cl <sub>0.026</sub>                    | 330 | -92.10  | 30150.00  | 0.900 | 0.094 |
| Co <sub>0.99</sub> Ni <sub>0.01</sub> GeTe                                                  | 478 | -142.34 | 48138.00  | 5.114 | 0.091 |
| CuGa <sub>0.98</sub> Mn <sub>0.02</sub> Te <sub>2</sub>                                     | 425 | 278.80  | 10439.00  | 4.532 | 0.076 |
| SnTe <sub>0.15</sub> AgSbSe <sub>2</sub>                                                    | 500 | 101.00  | 112400.00 | 2.010 | 0.285 |
| Ca <sub>14</sub> MgBi <sub>11</sub>                                                         | 326 | 56.42   | 19835.00  | 0.753 | 0.027 |
| ZrNiPb <sub>0.995</sub> Bi <sub>0.005</sub>                                                 | 673 | -225.00 | 81483.00  | 6.033 | 0.458 |
| Y <sub>0.2</sub> Bi <sub>1.8</sub> Te <sub>3</sub>                                          | 458 | -150.00 | 66600.00  | 0.740 | 0.925 |
| In <sub>0.01</sub> Pb <sub>0.99</sub> Te <sub>0.994</sub> I <sub>0.006</sub>                | 378 | -179.20 | 57900.00  | 1.774 | 0.396 |
| Mg <sub>3.5</sub> Gd <sub>0.04</sub> Sb <sub>2</sub>                                        | 600 | -290.85 | 12405.00  | 0.709 | 0.888 |
| CaTiO <sub>3</sub>                                                                          | 740 | -280.00 | 2450.00   | 3.350 | 0.042 |
| Ag <sub>0.01</sub> Sn <sub>0.99</sub> Se <sub>0.85</sub> S <sub>0.15</sub>                  | 763 | 362.39  | 1451.00   | 0.130 | 1.118 |
| Yb <sub>13</sub> CaMnSb <sub>11</sub>                                                       | 573 | 109.00  | 32400.00  | 0.897 | 0.242 |
| Rb <sub>2</sub> Bi <sub>8</sub> Se <sub>12.9935</sub>                                       | 428 | -263.60 | 5455.00   | 0.608 | 0.267 |
| In <sub>4</sub> Pb <sub>0.01</sub> Sn <sub>0.03</sub> Se <sub>2.9</sub> Cl <sub>0.02</sub>  | 473 | -229.40 | 13900.00  | 0.744 | 0.472 |
| Ti <sub>0.925</sub> Mn <sub>0.075</sub> NiSn <sub>0.925</sub> Sb <sub>0.075</sub>           | 498 | -97.51  | 255629.00 | 6.450 | 0.188 |
| CoSb <sub>3.0</sub>                                                                         | 623 | 150.00  | 10526.00  | 4.300 | 0.034 |
| MgAgSb                                                                                      | 300 | 172.18  | 49818.00  | 1.066 | 0.416 |
| Ba <sub>0.14</sub> In <sub>0.23</sub> Co <sub>4</sub> Sb <sub>11.84</sub>                   | 300 | -128    | 194400.00 | 1.500 | 0.400 |
| Ba <sub>8.01</sub> Ga <sub>15.89</sub> Zn <sub>0.006</sub> Sn <sub>30.1</sub>               | 540 | 404.60  | 10940.00  | 1.022 | 0.946 |
| TmCuTe <sub>2</sub>                                                                         | 818 | 179.70  | 19177.00  | 0.694 | 0.730 |
| Sr <sub>0.21</sub> Co <sub>4</sub> Sb <sub>12.25</sub>                                      | 800 | -193.00 | 125000.00 | 3.680 | 1.012 |
| Mg <sub>3.5</sub> Gd <sub>0.03</sub> Sb <sub>2</sub>                                        | 600 | -272.89 | 13942.00  | 0.762 | 0.818 |
| Ta <sub>0.96</sub> Ti <sub>0.04</sub> FeSb                                                  | 304 | 178.50  | 77700.00  | 6.920 | 0.109 |
| Ag <sub>0.04</sub> Cr <sub>1.96</sub> Se <sub>3</sub>                                       | 300 | 80.00   | 38107.00  | 1.518 | 0.048 |

|                                                                                             |      |         |           |        |       |
|---------------------------------------------------------------------------------------------|------|---------|-----------|--------|-------|
| Ba <sub>0.99</sub> K <sub>0.01</sub> Zn <sub>2</sub> As <sub>2</sub>                        | 423  | 134.60  | 37209.00  | 1.936  | 0.147 |
| Ag <sub>2</sub> Se <sub>1.04</sub>                                                          | 362  | -141.40 | 126300.00 | 1.080  | 0.847 |
| Cu <sub>2</sub> Se <sub>0.98</sub> S <sub>0.02</sub>                                        | 372  | 113.00  | 72000.00  | 0.574  | 0.596 |
| Zn <sub>0.875</sub> Cd <sub>0.125</sub> Sc <sub>0.02</sub> O <sub>1.03</sub>                | 973  | -139.00 | 25300.00  | 3.000  | 0.159 |
| Ge <sub>0.55</sub> Pb <sub>0.45</sub> Te <sub>0.8</sub> Se <sub>0.2</sub>                   | 470  | 126.70  | 23904.00  | 0.968  | 0.180 |
| Cu <sub>1.85</sub> Ag <sub>0.15</sub> SnSe <sub>3</sub>                                     | 400  | 288.78  | 980.00    | 0.695  | 0.047 |
| YbCd <sub>1.7</sub> Zn <sub>0.3</sub> Sb <sub>2</sub>                                       | 450  | 160.00  | 60200.00  | 1.540  | 0.462 |
| Pb <sub>0.96</sub> Tl <sub>0.02</sub> Na <sub>0.02</sub> Te                                 | 696  | 236.60  | 38860.00  | 0.944  | 1.604 |
| FeNb <sub>0.86</sub> Zr <sub>0.14</sub> Sb                                                  | 400  | 117.96  | 354264.00 | 9.644  | 0.204 |
| Ca <sub>0.99</sub> Yb <sub>4.01</sub> Al <sub>2</sub> Sb <sub>5.84</sub> Ge <sub>0.16</sub> | 565  | 198.58  | 2570.00   | 0.978  | 0.059 |
| CuGa <sub>0.97</sub> Mn <sub>0.03</sub> Te <sub>2</sub>                                     | 575  | 231.00  | 20783.00  | 2.794  | 0.228 |
| Ca <sub>3</sub> Co <sub>2</sub> O <sub>6</sub>                                              | 473  | 213.60  | 111.00    | 6.710  | 0.000 |
| Ba <sub>8.07</sub> Cu <sub>4.89</sub> Si <sub>41.03</sub>                                   | 665  | -82.60  | 115320.00 | 2.723  | 0.192 |
| Tl <sub>8.99</sub> Sb <sub>1.01</sub> Te <sub>6</sub>                                       | 385  | 137.00  | 40400.00  | 0.607  | 0.481 |
| Bi <sub>1.92</sub> Nb <sub>0.08</sub> Te <sub>3</sub>                                       | 426  | -112.53 | 112792.00 | 0.814  | 0.747 |
| ZrNiPb <sub>0.98</sub> Bi <sub>0.02</sub>                                                   | 871  | -155.10 | 186420.00 | 7.140  | 0.547 |
| Ta <sub>0.74</sub> V <sub>0.1</sub> Ti <sub>0.16</sub> FeSb                                 | 969  | 227.70  | 86880.00  | 1.560  | 1.520 |
| (SnTe) <sub>0.88</sub> (CuSbTe <sub>2</sub> ) <sub>0.12</sub>                               | 323  | 40.11   | 299153.00 | 3.516  | 0.044 |
| Sn <sub>0.91</sub> Mn <sub>0.08</sub> Bi <sub>0.01</sub> Te                                 | 323  | 51.00   | 322000.00 | 4.310  | 0.063 |
| Cu <sub>1.95</sub> In <sub>0.05</sub> Se                                                    | 295  | 194.55  | 14865.00  | 1.250  | 0.155 |
| GeSe <sub>0.85</sub> Te <sub>0.15</sub>                                                     | 728  | 71.26   | 27985.00  | 1.583  | 0.065 |
| Zn <sub>0.875</sub> Cd <sub>0.125</sub> Sc <sub>0.02</sub> O <sub>1.03</sub>                | 1173 | -156.00 | 20700.00  | 2.583  | 0.229 |
| Sn <sub>0.92</sub> Ge <sub>0.04</sub> As <sub>0.04</sub> Te                                 | 620  | 65.06   | 343210.00 | 5.233  | 0.382 |
| AgCuSe                                                                                      | 298  | -74.56  | 89860.00  | 1.661  | 0.090 |
| Cu <sub>2</sub> SnSe <sub>3</sub>                                                           | 622  | 212.57  | 4084.00   | 1.280  | 0.090 |
| (SnTe) <sub>10</sub> Sb <sub>2</sub> Te <sub>3</sub>                                        | 423  | 102.93  | 153125.00 | 2.190  | 0.313 |
| Bi <sub>0.825</sub> Ba <sub>0.175</sub> CuSeO                                               | 623  | 191.67  | 13413.00  | 0.605  | 0.631 |
| Al <sub>0.01</sub> Sb <sub>0.1</sub> Ge <sub>0.89</sub> Te                                  | 373  | 181.99  | 48755.00  | 1.424  | 0.365 |
| Co <sub>9</sub> S <sub>8</sub>                                                              | 300  | -19.20  | 1269362   | 10.000 | 0.014 |
| MgAgSb <sub>0.985</sub> In <sub>0.015</sub>                                                 | 300  | 148.90  | 90185.00  | 1.425  | 0.421 |
| Sn <sub>0.91</sub> Mn <sub>0.09</sub> Te <sub>0.98</sub> l <sub>0.02</sub>                  | 331  | 59.28   | 223590.00 | 3.374  | 0.077 |
| Sn <sub>0.98</sub> In <sub>0.02</sub> Se                                                    | 523  | 492.00  | 70.00     | 0.631  | 0.014 |
| GeTe                                                                                        | 373  | 42.86   | 591071.00 | 6.101  | 0.066 |

|                                                                                                                 |      |         |           |       |       |
|-----------------------------------------------------------------------------------------------------------------|------|---------|-----------|-------|-------|
| Sn <sub>0.965</sub> Pb <sub>0.01</sub> Cd <sub>0.025</sub> Se                                                   | 873  | 310.60  | 7413.00   | 0.415 | 1.505 |
| Cd <sub>2</sub> Cu <sub>3</sub> In <sub>3</sub> Te <sub>8</sub>                                                 | 377  | 159.46  | 17034.00  | 1.685 | 0.097 |
| Ta <sub>0.84</sub> Ti <sub>0.16</sub> FeSb                                                                      | 670  | 183.60  | 162953.00 | 4.135 | 0.890 |
| In <sub>4</sub> Se <sub>2.32</sub> Cl <sub>0.03</sub>                                                           | 623  | -296.70 | 12000.00  | 0.738 | 0.892 |
| AgBi <sub>0.85</sub> Sb <sub>0.15</sub> Se <sub>2</sub>                                                         | 575  | 194.15  | 165.90    | 0.327 | 0.011 |
| Pb <sub>0.99</sub> Na <sub>0.01</sub> Te                                                                        | 497  | 164.05  | 88159.00  | 1.872 | 0.630 |
| LiGe <sub>3.5</sub> Sb <sub>2</sub> Te <sub>7</sub>                                                             | 473  | 232.60  | 29000.00  | 0.938 | 0.750 |
| Ca <sub>3</sub> Co <sub>2</sub> O <sub>6</sub>                                                                  | 673  | 157.00  | 2000.00   | 5.330 | 0.006 |
| Cu <sub>2.82</sub> Ag <sub>0.18</sub> SbSe <sub>4</sub>                                                         | 448  | 408.00  | 5851.00   | 1.000 | 0.430 |
| Ag <sub>0.4</sub> Sb <sub>1.1</sub> Pb <sub>19.6</sub> Te <sub>18.8</sub>                                       | 573  | -120.00 | 18400.00  | 1.340 | 0.113 |
| GeSe <sub>0.6</sub> Te <sub>0.4</sub>                                                                           | 630  | 100.00  | 144776.00 | 2.183 | 0.418 |
| Cu <sub>7</sub> P(S <sub>0.55</sub> Se <sub>0.45</sub> ) <sub>6</sub>                                           | 523  | 284.00  | 1580.00   | 0.228 | 0.292 |
| Cu <sub>26</sub> V <sub>2</sub> Ge <sub>3</sub> Sb <sub>3</sub> S <sub>32</sub>                                 | 674  | 206.02  | 24605.00  | 0.955 | 0.737 |
| Mg <sub>0.97</sub> Li <sub>0.03</sub> Ge <sub>0.8</sub> Si <sub>0.2</sub>                                       | 500  | 325.50  | 8923.00   | 2.766 | 0.171 |
| Mg <sub>3.5</sub> Gd <sub>0.01</sub> Sb <sub>2</sub>                                                            | 700  | -323.94 | 5062.00   | 0.725 | 0.513 |
| NbCo <sub>0.98</sub> Ni <sub>0.02</sub> Sn                                                                      | 1001 | -194.71 | 37160.00  | 6.619 | 0.213 |
| Cu <sub>11.8</sub> Gd <sub>0.2</sub> Sb <sub>4</sub> S <sub>13</sub>                                            | 327  | 79.12   | 110412.00 | 1.411 | 0.160 |
| Bi <sub>2.0</sub> S <sub>2.85</sub> Se <sub>0.15</sub>                                                          | 723  | -495.00 | 547.00    | 0.510 | 0.190 |
| Eu(Zn <sub>0.5</sub> Cd <sub>0.5</sub> ) <sub>2</sub> Sb <sub>2</sub>                                           | 450  | 217.00  | 24566.00  | 1.200 | 0.434 |
| (Ag <sub>0.1</sub> Sb <sub>0.1</sub> Sn <sub>0.8</sub> )(S <sub>0.1</sub> Se <sub>0.1</sub> Te <sub>0.8</sub> ) | 303  | 60.79   | 145794.00 | 1.811 | 0.090 |
| GeTe                                                                                                            | 475  | 52.67   | 396552.00 | 4.854 | 0.108 |
| Mg <sub>0.99</sub> Li <sub>0.01</sub> Ge <sub>0.9</sub> Si <sub>0.1</sub>                                       | 600  | 318.12  | 12692.00  | 2.975 | 0.259 |
| Sn <sub>0.99</sub> Ce <sub>0.01</sub> Te                                                                        | 423  | 32.00   | 400000.00 | 5.324 | 0.033 |
| Ca <sub>10</sub> MnSb <sub>9</sub>                                                                              | 473  | 32.09   | 9.57      | 0.655 | 0.000 |
| YbCd <sub>1.7</sub> Zn <sub>0.3</sub> Sb <sub>2</sub>                                                           | 350  | 128.60  | 71800.00  | 1.760 | 0.248 |
| Ba <sub>8.07</sub> Cu <sub>4.89</sub> Si <sub>41.03</sub>                                                       | 811  | -92.50  | 100000.00 | 2.918 | 0.238 |
| Sn <sub>0.87</sub> Mn <sub>0.1</sub> Bi <sub>0.03</sub> Te                                                      | 773  | 144.00  | 100000.00 | 2.670 | 0.593 |
| As <sub>2</sub> Te <sub>1.5</sub> Se <sub>1.5</sub>                                                             | 373  | 587.76  | 13.89     | 0.341 | 0.005 |
| In <sub>3.94</sub> Pb <sub>0.06</sub> Se <sub>3</sub>                                                           | 518  | -256.00 | 8100.00   | 1.174 | 0.234 |
| Ba <sub>0.03</sub> Co <sub>4</sub> Sb <sub>12</sub>                                                             | 400  | -244.30 | 34000.00  | 4.753 | 0.167 |
| Ca <sub>9</sub> Yb <sub>2</sub> Sb <sub>7</sub> Ge <sub>3</sub>                                                 | 419  | 52.00   | 206.00    | 0.997 | 0.000 |
| AgCuTe <sub>0.8</sub> Se <sub>0.2</sub>                                                                         | 623  | 178.42  | 24854.00  | 0.563 | 0.876 |
| Ca <sub>3</sub> Co <sub>2</sub> O <sub>6</sub>                                                                  | 373  | 227.00  | 17.00     | 7.430 | 0.000 |

|                                                                                             |      |         |           |       |       |
|---------------------------------------------------------------------------------------------|------|---------|-----------|-------|-------|
| As <sub>2</sub> Te <sub>2.9</sub> Se <sub>0.1</sub>                                         | 473  | 155.45  | 1930.70   | 0.619 | 0.027 |
| EuCd <sub>2</sub> Sb <sub>2</sub>                                                           | 550  | 307.00  | 7500.00   | 0.810 | 0.480 |
| Cu <sub>1.85</sub> Se                                                                       | 301  | 25.58   | 493269.00 | 2.881 | 0.034 |
| ZrNiPb <sub>0.92</sub> Sn <sub>0.6</sub> Bi <sub>0.02</sub>                                 | 303  | -97.00  | 333333.00 | 5.900 | 0.161 |
| AgCuTe <sub>0.9</sub> Se <sub>0.1</sub>                                                     | 422  | 181.15  | 24078.00  | 0.358 | 0.886 |
| Cu <sub>1.8</sub> Se                                                                        | 295  | 16.80   | 882432.00 | 7.063 | 0.010 |
| Pb <sub>0.97</sub> Tl <sub>0.015</sub> Na <sub>0.015</sub> Te                               | 301  | 119.16  | 95296.00  | 2.139 | 0.190 |
| Yb <sub>13.49</sub> Ce <sub>0.39</sub> Mn <sub>1.05</sub> Sb <sub>11.08</sub>               | 1073 | 222.81  | 12393.00  | 0.662 | 0.997 |
| Ag <sub>8</sub> Sn <sub>0.6</sub> Ga <sub>0.4</sub> Se <sub>6</sub>                         | 640  | -213.79 | 7459.00   | 0.298 | 0.732 |
| Cu <sub>2.88</sub> Ag <sub>0.12</sub> SbSe <sub>4</sub>                                     | 598  | 350.00  | 8000.00   | 0.850 | 0.670 |
| Ca <sub>3</sub> Al <sub>0.98</sub> Zn <sub>0.02</sub> Sb <sub>3</sub>                       | 822  | 277.30  | 3830.00   | 0.672 | 0.360 |
| YbSi <sub>2</sub>                                                                           | 377  | -46.20  | 700000.00 | 9.150 | 0.062 |
| Cu <sub>3</sub> Sb <sub>0.998</sub> In <sub>0.002</sub> Se <sub>4</sub>                     | 323  | 270.00  | 4255.00   | 2.403 | 0.042 |
| AgCuSe                                                                                      | 694  | 230.50  | 9100.00   | 0.529 | 0.607 |
| LiGe <sub>11.5</sub> Sb <sub>2</sub> Te <sub>15</sub>                                       | 623  | 256.70  | 41600.00  | 1.339 | 1.300 |
| AgBiSe <sub>2</sub>                                                                         | 400  | -83.33  | 36.00     | 0.476 | 0.000 |
| Bi <sub>2.0</sub> S <sub>2.79</sub> Se <sub>0.21</sub>                                      | 723  | -536.00 | 419.00    | 0.480 | 0.181 |
| GeSe                                                                                        | 623  | 742.80  | 53.11     | 1.136 | 0.016 |
| Ca <sub>0.99</sub> Yb <sub>4.01</sub> Al <sub>2</sub> Sb <sub>5.84</sub> Ge <sub>0.16</sub> | 517  | 212.74  | 2056.00   | 0.970 | 0.050 |
| Yb <sub>9</sub> Ca <sub>4</sub> BaMgSb <sub>11</sub>                                        | 1200 | 235.90  | 11493.00  | 0.610 | 1.257 |
| AgSb <sub>0.99</sub> Mn <sub>0.01</sub> Te <sub>2</sub>                                     | 301  | 76.70   | 51733.00  | 0.997 | 0.092 |
| Ca <sub>5</sub> Al <sub>1.9</sub> Zn <sub>0.1</sub> Sb <sub>6</sub>                         | 773  | 167.30  | 16313.00  | 0.980 | 0.360 |
| Pb <sub>0.96</sub> Tl <sub>0.02</sub> Na <sub>0.02</sub> Te                                 | 597  | 220.59  | 45914.00  | 1.150 | 1.160 |
| Ag <sub>0.01</sub> Sn <sub>0.99</sub> Se <sub>0.9</sub> S <sub>0.1</sub>                    | 518  | 385.04  | 698.00    | 0.197 | 0.272 |
| Ba <sub>8.03</sub> Cu <sub>5</sub> Ge <sub>40.97</sub>                                      | 465  | -125.00 | 42120.00  | 1.270 | 0.241 |
| Pb <sub>6</sub> Bi <sub>2</sub> Se <sub>9</sub>                                             | 673  | -193.20 | 10962.00  | 1.118 | 0.246 |
| Ag <sub>2.0</sub> Se <sub>0.6</sub> Te <sub>0.4</sub>                                       | 330  | -109.00 | 78350.00  | 0.706 | 0.435 |
| Mg <sub>3</sub> Sb <sub>1.8</sub> Bi <sub>0.2</sub>                                         | 470  | 357.00  | 559.00    | 0.910 | 0.037 |
| SnAgSbSe <sub>2</sub>                                                                       | 800  | 118.20  | 115800.00 | 3.370 | 0.410 |
| Ba <sub>8.01</sub> Ga <sub>15.83</sub> Zn <sub>0.019</sub> Sn <sub>30.15</sub>              | 420  | 466.50  | 4480.00   | 0.757 | 0.541 |
| Bi <sub>0.875</sub> Ba <sub>0.125</sub> CuSeO                                               | 420  | 178.20  | 15000.00  | 0.859 | 0.258 |
| Bi <sub>1.94</sub> Nb <sub>0.06</sub> Te <sub>3</sub>                                       | 505  | -115.60 | 57078.00  | 0.847 | 0.455 |
| Ba <sub>0.11</sub> Yb <sub>0.08</sub> Co <sub>4</sub> Sb <sub>12</sub>                      | 300  | -107.00 | 211500.00 | 2.380 | 0.300 |



|                                                                                             |     |         |           |       |       |
|---------------------------------------------------------------------------------------------|-----|---------|-----------|-------|-------|
| Gd <sub>2</sub> Se <sub>2.94</sub>                                                          | 450 | -109.40 | 30650.00  | 1.774 | 0.093 |
| Ge <sub>12</sub> Sb <sub>2</sub> Te <sub>15</sub>                                           | 523 | 233.30  | 30300.00  | 1.490 | 0.579 |
| SnTe                                                                                        | 500 | 49.00   | 413460.00 | 6.550 | 0.076 |
| Na <sub>0.13</sub> Co <sub>4</sub> Sb <sub>12</sub>                                         | 700 | -259    | 41000.00  | 3.200 | 0.500 |
| Ba <sub>8.04</sub> Cu <sub>4.9</sub> Si <sub>3.23</sub> Ge <sub>37.83</sub>                 | 663 | -129.80 | 55000.00  | 1.506 | 0.408 |
| Cu <sub>11.7</sub> Gd <sub>0.3</sub> Sb <sub>4</sub> S <sub>13</sub>                        | 523 | 106.01  | 108671.00 | 1.434 | 0.446 |
| Ag(Bi <sub>0.8</sub> Nb <sub>0.2</sub> ) <sub>0.9</sub> Sb <sub>0.1</sub> Se <sub>2</sub>   | 378 | -77.00  | 46416.00  | 0.714 | 0.146 |
| Ge <sub>0.96</sub> Mn <sub>0.02</sub> Sb <sub>0.02</sub> Te                                 | 698 | 187.00  | 100000.00 | 1.786 | 1.367 |
| Ge <sub>4</sub> Sb <sub>2</sub> Te <sub>7</sub>                                             | 723 | 132.00  | 72480.00  | 1.765 | 0.517 |
| Mg <sub>3.5</sub> Gd <sub>0.04</sub> Sb <sub>2</sub>                                        | 500 | -278.00 | 13524.00  | 0.806 | 0.649 |
| Cu <sub>5</sub> SnSbSe <sub>6.3</sub>                                                       | 673 | 83.12   | 101724.00 | 2.060 | 0.230 |
| Sr <sub>0.11</sub> Ba <sub>0.18</sub> Co <sub>4</sub> Sb <sub>12.09</sub>                   | 850 | -166.00 | 206818.00 | 3.970 | 1.220 |
| Nd <sub>2.92</sub> Te <sub>4</sub>                                                          | 773 | -68.00  | 129600.00 | 2.765 | 0.168 |
| Cu <sub>2.8</sub> Sn <sub>0.2</sub> Sb <sub>0.8</sub> Se <sub>3.8</sub>                     | 372 | 44.57   | 370149.00 | 5.240 | 0.052 |
| Nb <sub>0.8</sub> Ta <sub>0.2</sub> CoSn <sub>0.9</sub> Sb <sub>0.1</sub>                   | 338 | -104.23 | 122979.00 | 4.918 | 0.092 |
| BiCuSeO                                                                                     | 873 | 326.40  | 2450.00   | 0.437 | 0.521 |
| AgBi <sub>0.7</sub> Sb <sub>0.3</sub> Se <sub>2</sub>                                       | 378 | -361.11 | 400.00    | 0.469 | 0.042 |
| Ca <sub>1.18</sub> Yb <sub>3.82</sub> Al <sub>1.84</sub> In <sub>0.16</sub> Sb <sub>6</sub> | 520 | 36.19   | 28545.00  | 2.700 | 0.007 |
| Cu <sub>11.6</sub> Gd <sub>0.4</sub> Sb <sub>4</sub> S <sub>13</sub>                        | 327 | 81.30   | 102008.00 | 1.300 | 0.170 |
| Cu <sub>10.5</sub> Ni <sub>1.3</sub> Zn <sub>0.2</sub> Sb <sub>4</sub> S <sub>13</sub>      | 715 | 200.70  | 22670.00  | 0.732 | 0.891 |
| BaCu <sub>4.0</sub> S <sub>3.0</sub>                                                        | 700 | 141.00  | 9381.00   | 0.864 | 0.151 |
| NbCoSb                                                                                      | 303 | -59.20  | 239370.00 | 3.980 | 0.040 |
| Li <sub>1.01</sub> Co <sub>0.85</sub> Ni <sub>0.15</sub> O <sub>2</sub>                     | 423 | 269.50  | 0.26      | 0.980 | 0.000 |
| As <sub>2</sub> Te <sub>1.5</sub> Se <sub>1.5</sub>                                         | 323 | 575.51  | 7.80      | 0.347 | 0.002 |
| AgCuTe <sub>0.9</sub> Se <sub>0.1</sub>                                                     | 723 | 225.87  | 17864.00  | 0.578 | 1.140 |
| Ag <sub>2</sub> Se <sub>0.98</sub>                                                          | 332 | -115.60 | 184930.00 | 1.192 | 0.688 |
| Sn <sub>1.03</sub> Se <sub>0.15</sub> Te <sub>0.85</sub>                                    | 623 | 88.88   | 144737.00 | 2.786 | 0.256 |
| (Cu <sub>0.003</sub> Pb <sub>0.997</sub> Te)(MnTe) <sub>0.03</sub>                          | 523 | -173.16 | 83699.00  | 1.584 | 0.829 |
| Ba <sub>8.02</sub> Cu <sub>5.04</sub> Si <sub>6</sub> Ge <sub>34.93</sub>                   | 615 | -115.52 | 56349.00  | 1.377 | 0.336 |
| Cu <sub>2</sub> ZnSnSe <sub>4</sub>                                                         | 673 | 192.00  | 12300.00  | 3.018 | 0.101 |
| Cu <sub>2</sub> Sn <sub>0.95</sub> Fe <sub>0.05</sub> Se <sub>3</sub>                       | 523 | 87.86   | 86824.00  | 2.314 | 0.151 |
| Mg <sub>2</sub> ZnSb <sub>2</sub>                                                           | 300 | 427.50  | 662.00    | 0.734 | 0.049 |
| Ge <sub>0.99</sub> Mn <sub>0.01</sub> Te                                                    | 298 | 32.58   | 589691.00 | 6.781 | 0.028 |

|                                                                                             |      |         |           |        |       |
|---------------------------------------------------------------------------------------------|------|---------|-----------|--------|-------|
| Ag <sub>0.97</sub> Cr <sub>0.99</sub> Sb <sub>0.01</sub> Se <sub>2</sub>                    | 303  | 78.60   | 30323.00  | 0.586  | 0.097 |
| In <sub>0.005</sub> Pb <sub>0.995</sub> Te <sub>0.994</sub> l <sub>0.006</sub>              | 637  | -162.30 | 44450.00  | 1.421  | 0.525 |
| Mn <sub>2</sub> Cu <sub>3</sub> In <sub>3</sub> Te <sub>8</sub>                             | 625  | 432.40  | 320.00    | 1.048  | 0.036 |
| Er <sub>0.01</sub> (Bi <sub>0.23</sub> Sb <sub>0.77</sub> ) <sub>1.99</sub> Te <sub>3</sub> | 350  | 241.79  | 46228.00  | 0.861  | 1.099 |
| (SnTe) <sub>0.86</sub> (CuSbTe <sub>2</sub> ) <sub>0.14</sub>                               | 324  | 42.58   | 278383.00 | 3.391  | 0.048 |
| Ba <sub>8</sub> Cu <sub>5.04</sub> Si <sub>13.01</sub> Ge <sub>27.96</sub>                  | 665  | -116.20 | 57450.00  | 1.814  | 0.284 |
| Ag <sub>8</sub> SnSe <sub>6</sub>                                                           | 640  | -145.10 | 19440.00  | 0.405  | 0.647 |
| Ba <sub>0.10</sub> La <sub>0.05</sub> Yb <sub>0.15</sub> Co <sub>4</sub> Sb <sub>12</sub>   | 850  | -174    | 171500.00 | 0.300  | 1.400 |
| Cu <sub>2</sub> Se <sub>0.9</sub> S <sub>0.1</sub>                                          | 769  | 202.97  | 19811.00  | 0.437  | 1.435 |
| Ge <sub>9</sub> Sb <sub>2</sub> Te <sub>12</sub>                                            | 827  | 168.75  | 95455.00  | 1.687  | 1.333 |
| Ba <sub>8</sub> Cu <sub>5.04</sub> Si <sub>13.01</sub> Ge <sub>27.96</sub>                  | 466  | -91.80  | 74300.00  | 1.870  | 0.156 |
| (GeTe) <sub>0.9</sub> (AgSnSe <sub>2</sub> ) <sub>0.1</sub>                                 | 523  | 53.40   | 291613.00 | 3.515  | 0.124 |
| Tl <sub>9.0</sub> Sb <sub>0.98</sub> Te <sub>6</sub>                                        | 444  | 159.00  | 32455.00  | 0.586  | 0.630 |
| (GeTe) <sub>0.9</sub> (AgSnSe <sub>2</sub> ) <sub>0.1</sub>                                 | 423  | 46.58   | 276129.00 | 2.990  | 0.085 |
| NbCo <sub>0.92</sub> Ni <sub>0.08</sub> Sn                                                  | 1002 | -144.20 | 81429.00  | 5.550  | 0.306 |
| Sn <sub>0.9</sub> Pb <sub>0.09</sub> Zn <sub>0.01</sub> Se                                  | 300  | 507.09  | 274.00    | 1.266  | 0.017 |
| Ba <sub>0.99</sub> K <sub>0.01</sub> Zn <sub>2</sub> As <sub>2</sub>                        | 523  | 158.64  | 29358.00  | 1.681  | 0.230 |
| Ba <sub>0.03</sub> Co <sub>4</sub> Sb <sub>12</sub>                                         | 700  | -184.83 | 32978.00  | 3.729  | 0.211 |
| AgBi <sub>0.97</sub> Pb <sub>0.03</sub> Se <sub>2.12</sub>                                  | 350  | 423.18  | 1301.00   | 0.534  | 0.153 |
| Sn <sub>0.98</sub> Ce <sub>0.02</sub> Te                                                    | 623  | 101.70  | 129114.00 | 2.536  | 0.328 |
| CuFe <sub>0.98</sub> In <sub>0.02</sub> S <sub>2</sub>                                      | 510  | -353.00 | 4800.00   | 2.743  | 0.111 |
| Li <sub>1.04</sub> Co <sub>0.85</sub> Ni <sub>0.15</sub> O <sub>2</sub>                     | 923  | 280.50  | 200.00    | 1.190  | 0.012 |
| BaCu <sub>4.0</sub> S <sub>3.0</sub>                                                        | 600  | 111.00  | 10825.00  | 0.875  | 0.091 |
| Tl <sub>9.0</sub> Bi <sub>0.95</sub> Te <sub>6.0</sub>                                      | 500  | 198.00  | 21000.00  | 0.500  | 0.823 |
| As <sub>2</sub> Te <sub>2.6</sub> Se <sub>0.4</sub>                                         | 298  | 203.96  | 623.22    | 0.619  | 0.012 |
| BaBiTe <sub>2.9</sub> Se <sub>0.1</sub>                                                     | 474  | -191.00 | 4245.00   | 0.396  | 0.185 |
| CuFeS <sub>2</sub>                                                                          | 10   | -97.70  | 1.08      | 11.700 | 0.000 |
| Cu <sub>3</sub> Sb <sub>0.9</sub> Ge <sub>0.1</sub> S <sub>4</sub>                          | 300  | 150.00  | 28400.00  | 2.100  | 0.091 |
| Cu <sub>5</sub> Sn <sub>2</sub> Se <sub>7</sub>                                             | 698  | 51.06   | 233635.00 | 3.314  | 0.128 |
| Yb <sub>10</sub> Ca <sub>3</sub> BaMgSb <sub>11</sub>                                       | 300  | 50.00   | 19826.00  | 0.530  | 0.028 |
| Ga <sub>0.06</sub> Co <sub>4</sub> Sb <sub>11.97</sub> Ga <sub>0.03</sub>                   | 650  | -289    | 19300.00  | 2.300  | 0.400 |
| Ag <sub>8</sub> Sn <sub>0.7</sub> Ga <sub>0.3</sub> Se <sub>6</sub>                         | 673  | -158.41 | 16304.00  | 0.358  | 0.780 |
| BaCu <sub>3.96</sub> S <sub>3.0</sub>                                                       | 500  | 84.00   | 20103.00  | 0.773  | 0.092 |
| Mg <sub>1.98</sub> Ag <sub>0.02</sub> Zn <sub>0.98</sub> Sb <sub>2</sub>                    | 773  | 165.70  | 27513.00  | 0.973  | 0.600 |
| CuFeS <sub>2</sub>                                                                          | 510  | -361.60 | 4880.00   | 3.512  | 0.093 |
| Zn <sub>0.95</sub> Cd <sub>0.05</sub> Sc <sub>0.02</sub> O <sub>1.03</sub>                  | 1073 | -153.00 | 11300.00  | 3.750  | 0.076 |
| SnTe <sub>0.2</sub> AgSbSe <sub>2</sub>                                                     | 600  | 127.93  | 72819.00  | 1.086  | 0.717 |
| ZrNiPb <sub>0.94</sub> Sn <sub>0.4</sub> Bi <sub>0.02</sub>                                 | 475  | -115.61 | 293000.00 | 5.577  | 0.334 |
| In <sub>0.005</sub> Pb <sub>0.995</sub> Te <sub>0.998</sub> l <sub>0.002</sub>              | 663  | -231.00 | 17936.00  | 1.269  | 0.500 |
| Bi <sub>2.0</sub> S <sub>3.0</sub>                                                          | 623  | -601.00 | 83.00     | 0.470  | 0.040 |

|                                                                                                |      |         |           |       |       |
|------------------------------------------------------------------------------------------------|------|---------|-----------|-------|-------|
| ZrCo <sub>0.9</sub> Ni <sub>0.1</sub> Bi <sub>0.85</sub> Sb <sub>0.15</sub>                    | 302  | -111.40 | 95100.00  | 3.250 | 0.090 |
| Bi <sub>0.8</sub> Pb <sub>0.1</sub> Yb <sub>0.1</sub> CuSeO                                    | 446  | 102.96  | 24000.00  | 0.697 | 0.163 |
| Ce <sub>0.15</sub> Co <sub>4</sub> Sb <sub>12</sub>                                            | 300  | -119    | 151500.00 | 2.400 | 0.200 |
| Yb <sub>8</sub> Ca <sub>5</sub> BaMgSb <sub>11</sub>                                           | 1200 | 229.60  | 10923.00  | 0.670 | 1.032 |
| Nd <sub>3</sub> Te <sub>4</sub>                                                                | 773  | -57.00  | 190000.00 | 3.368 | 0.140 |
| Co <sub>0.97</sub> Ni <sub>0.03</sub> GeTe                                                     | 626  | -118.09 | 71542.00  | 4.313 | 0.145 |
| (SnTe) <sub>12</sub> Sb <sub>2</sub> Te <sub>3</sub>                                           | 623  | 143.53  | 105000.00 | 2.000 | 0.674 |
| ZrNiPb <sub>0.96</sub> Sn <sub>0.2</sub> Bi <sub>0.02</sub>                                    | 475  | -110.90 | 351120.00 | 6.342 | 0.323 |
| FeNb <sub>0.80</sub> Ti <sub>0.20</sub> Sb                                                     | 900  | 180.00  | 125000.00 | 4.700 | 0.776 |
| LiCo <sub>0.85</sub> Ni <sub>0.15</sub> O <sub>2</sub>                                         | 423  | 211.03  | 0.21      | 2.034 | 0.000 |
| LiGe <sub>11.5</sub> Sb <sub>2</sub> Te <sub>15</sub>                                          | 723  | 266.00  | 37640.00  | 1.339 | 1.450 |
| Ba <sub>0.19</sub> In <sub>0.07</sub> Co <sub>4</sub> Sb <sub>11.85</sub>                      | 300  | -151    | 161900.00 | 2.000 | 0.400 |
| Ge <sub>0.55</sub> Pb <sub>0.45</sub> Te <sub>0.8</sub> Se <sub>0.2</sub>                      | 668  | 129.81  | 29851.00  | 1.028 | 0.300 |
| SnSe                                                                                           | 823  | 325.33  | 5302.00   | 0.639 | 0.723 |
| Nb <sub>0.8</sub> Ta <sub>0.2</sub> CoSn <sub>0.9</sub> Sb <sub>0.1</sub>                      | 530  | -131.15 | 109078.00 | 4.490 | 0.221 |
| CuFe <sub>0.96</sub> In <sub>0.04</sub> S <sub>2</sub>                                         | 300  | -363.60 | 3488.00   | 4.232 | 0.033 |
| Cu <sub>2.94</sub> Ag <sub>0.06</sub> SbSe <sub>4</sub>                                        | 448  | 435.00  | 4384.00   | 1.310 | 0.284 |
| Bi <sub>1.92</sub> Nb <sub>0.08</sub> Te <sub>3</sub>                                          | 366  | -103.51 | 113961.00 | 0.840 | 0.532 |
| Ag <sub>0.5</sub> Sb <sub>1.1</sub> Pb <sub>19.6</sub> Te <sub>18.8</sub>                      | 573  | -100.00 | 24288.00  | 1.422 | 0.098 |
| Yb <sub>10</sub> LaCdSb <sub>9</sub>                                                           | 473  | 40.73   | 28800.00  | 0.847 | 0.027 |
| Ca <sub>9</sub> Yb <sub>2</sub> Sb <sub>9</sub> Ge                                             | 701  | 15.11   | 18763.00  | 1.113 | 0.003 |
| K <sub>0.985</sub> Ba <sub>0.015</sub> GaSb <sub>4</sub>                                       | 509  | -211.90 | 20000.00  | 0.893 | 0.512 |
| Ca <sub>5</sub> Ga <sub>1.8</sub> Zn <sub>0.2</sub> Sb <sub>6</sub>                            | 624  | 94.60   | 42070.00  | 1.413 | 0.166 |
| Sr <sub>14.5</sub> Ga <sub>29.2</sub> Ge <sub>56.3</sub>                                       | 367  | -113.89 | 81502.00  | 1.600 | 0.242 |
| Hf <sub>0.9</sub> Ti <sub>0.1</sub> CoSb <sub>0.8</sub> Sn <sub>0.2</sub>                      | 473  | 176.00  | 68794.00  | 3.380 | 0.298 |
| YbCd <sub>1.4</sub> Zn <sub>0.6</sub> Sb <sub>2</sub>                                          | 650  | 178.16  | 50000.00  | 1.244 | 0.860 |
| Mg <sub>2.16</sub> (Si <sub>0.4</sub> Sn <sub>0.6</sub> ) <sub>0.985</sub> Bi <sub>0.015</sub> | 400  | -159.00 | 146400.00 | 2.435 | 0.609 |
| Ba <sub>0.95</sub> K <sub>0.05</sub> Zn <sub>2</sub> As <sub>2</sub>                           | 423  | 39.51   | 160000.00 | 3.336 | 0.032 |
| BiSb(Se <sub>0.94</sub> Br <sub>0.06</sub> ) <sub>3</sub>                                      | 400  | -141.00 | 22500.00  | 0.570 | 0.314 |
| Ca <sub>1.14</sub> Yb <sub>3.86</sub> Al <sub>1.68</sub> In <sub>0.32</sub> Sb <sub>6</sub>    | 627  | 175.41  | 5427.00   | 0.933 | 0.112 |
| (Cu <sub>0.001</sub> Pb <sub>0.999</sub> Te)(MnTe) <sub>0.03</sub>                             | 523  | -217.02 | 51103.00  | 1.515 | 0.831 |
| Cu <sub>1.9</sub> Ag <sub>0.1</sub> SnSe <sub>3</sub>                                          | 500  | 163.64  | 4071.00   | 0.727 | 0.075 |
| AgBi <sub>0.95</sub> Pb <sub>0.05</sub> Se <sub>2.12</sub>                                     | 300  | 329.00  | 2735.00   | 0.570 | 0.156 |
| La <sub>0.25</sub> Ca <sub>0.75</sub> TiO <sub>3</sub>                                         | 840  | -146.30 | 36560.00  | 2.900 | 0.227 |
| Co <sub>0.99</sub> Ni <sub>0.01</sub> GeTe                                                     | 776  | -93.83  | 72340.00  | 4.840 | 0.102 |
| Cu <sub>5</sub> Sn <sub>2</sub> S <sub>7</sub>                                                 | 422  | 42.05   | 243011.00 | 4.238 | 0.043 |
| (Sn <sub>0.8</sub> Ge <sub>0.2</sub> ) <sub>0.8</sub> Mn <sub>0.2</sub> Te                     | 773  | 142.00  | 85460.00  | 1.560 | 0.854 |
| LiGe <sub>3.5</sub> Sb <sub>2</sub> Te <sub>7</sub>                                            | 723  | 275.33  | 31111.00  | 0.897 | 1.900 |
| SnS <sub>0.88</sub> Se <sub>0.12</sub>                                                         | 300  | 184.00  | 102724.00 | 2.370 | 0.440 |
| (SnTe) <sub>0.86</sub> (CuSbTe <sub>2</sub> ) <sub>0.14</sub>                                  | 432  | 61.20   | 210400.00 | 3.160 | 0.108 |
| Tl <sub>0.1</sub> Co <sub>4</sub> Sb <sub>12</sub>                                             | 100  | -75.60  | 171180.00 | 4.820 | 0.020 |

|                                                                                         |     |         |           |       |       |
|-----------------------------------------------------------------------------------------|-----|---------|-----------|-------|-------|
| Ag <sub>0.01</sub> Sn <sub>0.99</sub> Se                                                | 763 | 346.58  | 1802.00   | 0.269 | 0.615 |
| Sn <sub>0.98</sub> In <sub>0.02</sub> Se                                                | 473 | 472.00  | 58.00     | 0.670 | 0.008 |
| Yb <sub>9</sub> Ca <sub>4</sub> BaMgSb <sub>11</sub>                                    | 500 | 128.00  | 17200.00  | 0.564 | 0.250 |
| Pb <sub>0.97</sub> Tl <sub>0.015</sub> Na <sub>0.015</sub> Te                           | 696 | 239.22  | 35684.00  | 0.933 | 1.523 |
| (PbTe) <sub>0.15</sub> (Ag <sub>2</sub> Te) <sub>0.85</sub>                             | 450 | -140.60 | 37230.00  | 0.555 | 0.602 |
| Bi <sub>1.2</sub> Sb <sub>0.8</sub> Se <sub>2.88</sub> Cl <sub>0.12</sub>               | 400 | -123.00 | 22652.00  | 0.770 | 0.178 |
| Mg <sub>3.5</sub> Gd <sub>0.02</sub> Sb <sub>2</sub>                                    | 400 | -241.07 | 12249.00  | 0.987 | 0.288 |
| (Sn <sub>0.8</sub> Ge <sub>0.2</sub> ) <sub>0.94</sub> Mn <sub>0.06</sub> Te            | 573 | 86.70   | 173100.00 | 2.460 | 0.302 |
| Cu <sub>1.5</sub> S                                                                     | 550 | 24.59   | 436190.00 | 5.110 | 0.028 |
| (Sn <sub>0.985</sub> In <sub>0.015</sub> Te) <sub>0.9</sub> (AgCl) <sub>0.1</sub>       | 823 | 127.25  | 146067.00 | 2.256 | 0.863 |
| Ag <sub>8</sub> SnSe <sub>6</sub>                                                       | 426 | -440.80 | 495.00    | 0.262 | 0.140 |
| Co <sub>0.99</sub> Ni <sub>0.01</sub> GeTe                                              | 551 | -139.57 | 48404.00  | 4.758 | 0.109 |
| In <sub>0.30</sub> Co <sub>4</sub> Sb <sub>11.90</sub>                                  | 750 | -236    | 78000.00  | 1.600 | 1.200 |
| Ge <sub>0.83</sub> In <sub>0.05</sub> Pb <sub>0.12</sub> Te                             | 325 | 212.44  | 19263.00  | 0.973 | 0.290 |
| Bi <sub>1.2</sub> Sb <sub>0.8</sub> Se <sub>2.88</sub> Cl <sub>0.12</sub>               | 700 | -197.00 | 11320.00  | 0.620 | 0.496 |
| Ba <sub>0.99</sub> K <sub>0.01</sub> Zn <sub>2</sub> As <sub>2</sub>                    | 623 | 191.36  | 23358.00  | 1.475 | 0.361 |
| Bi <sub>2</sub> Te <sub>3</sub>                                                         | 473 | -156.80 | 77300.00  | 0.959 | 0.938 |
| Mo <sub>3</sub> Sb <sub>7</sub>                                                         | 823 | 44.70   | 401150.00 | 6.973 | 0.095 |
| Ag <sub>0.01</sub> Cu <sub>1.965</sub> S <sub>0.5</sub> Se <sub>0.5</sub>               | 300 | 120.00  | 5147.00   | 0.452 | 0.049 |
| Mg <sub>3</sub> Sb <sub>1.8</sub> Bi <sub>0.2</sub>                                     | 332 | 306.00  | 333.00    | 1.170 | 0.009 |
| K <sub>8</sub> Ga <sub>8</sub> Ge <sub>38</sub>                                         | 100 | 0.68    | 170.98    | 1.183 | 0.000 |
| Ag <sub>2.0</sub> Se <sub>0.5</sub> Te <sub>0.5</sub>                                   | 330 | -95.00  | 64495.00  | 0.648 | 0.296 |
| In <sub>0.015</sub> Pb <sub>0.985</sub> Te <sub>0.996</sub> l <sub>0.004</sub>          | 481 | -230.45 | 20780.00  | 1.400 | 0.379 |
| Cu <sub>1.85</sub> Se                                                                   | 603 | 44.42   | 274038.00 | 3.697 | 0.088 |
| Mo <sub>3</sub> Sb <sub>7</sub> l <sub>1.25</sub>                                       | 820 | 57.68   | 400000.00 | 6.214 | 0.175 |
| Nd <sub>2.86</sub> Te <sub>4</sub>                                                      | 973 | -122.00 | 68000.00  | 1.684 | 0.585 |
| Ca <sub>3.2</sub> Yb <sub>1.65</sub> Pr <sub>0.15</sub> Al <sub>2</sub> Sb <sub>6</sub> | 523 | 48.80   | 3750.00   | 1.455 | 0.003 |
| FeNb <sub>0.80</sub> Ti <sub>0.20</sub> Sb                                              | 500 | 111.00  | 270000.00 | 5.900 | 0.282 |
| Ca <sub>5</sub> Ga <sub>1.9</sub> Zn <sub>0.1</sub> Sb <sub>6</sub>                     | 773 | 152.90  | 23180.00  | 1.082 | 0.385 |
| Ag <sub>0.97</sub> CrSe <sub>2</sub>                                                    | 753 | 157.48  | 10000.00  | 0.399 | 0.468 |
| Zn <sub>2</sub> Cu <sub>3</sub> In <sub>3</sub> Te <sub>8</sub>                         | 424 | 159.00  | 17900.00  | 2.452 | 0.078 |
| FeNb <sub>0.86</sub> Zr <sub>0.14</sub> Sb                                              | 500 | 139.08  | 272093.00 | 8.576 | 0.307 |
| Ag <sub>0.97</sub> Cr <sub>0.97</sub> Bi <sub>0.03</sub> Se <sub>2</sub>                | 703 | 151.92  | 12877.00  | 0.396 | 0.528 |
| TiZr <sub>0.005</sub> NiSn                                                              | 423 | -160.00 | 51077.00  | 2.670 | 0.219 |
| (PbTe) <sub>0.05</sub> (Ag <sub>2</sub> Te) <sub>0.95</sub>                             | 350 | -92.50  | 145550.00 | 0.821 | 0.531 |
| ZrNiPb                                                                                  | 871 | -124.90 | 61219.00  | 6.860 | 0.121 |
| Cu <sub>2</sub> Se                                                                      | 425 | 118.00  | 51060.00  | 0.856 | 0.353 |
| Li <sub>1.01</sub> Co <sub>0.85</sub> Ni <sub>0.15</sub> O <sub>2</sub>                 | 623 | 306.00  | 7.46      | 1.170 | 0.000 |
| Cu <sub>2</sub> Se <sub>0.96</sub> S <sub>0.04</sub>                                    | 750 | 210.53  | 25457.00  | 0.800 | 1.058 |
| VFeSb                                                                                   | 700 | -187.20 | 56024.00  | 4.723 | 0.278 |
| Ba <sub>1.9</sub> Bi <sub>0.1</sub> CoRuO <sub>6</sub>                                  | 418 | 30.87   | 86290.00  | 1.433 | 0.024 |

|                                                                                                          |      |         |           |       |       |
|----------------------------------------------------------------------------------------------------------|------|---------|-----------|-------|-------|
| Ba <sub>0.06</sub> La <sub>0.05</sub> Yb <sub>0.06</sub> Co <sub>4</sub> Sb <sub>12</sub>                | 300  | -138    | 183200.00 | 1.900 | 0.400 |
| Rb <sub>2</sub> Bi <sub>8</sub> Se <sub>12.9935</sub>                                                    | 625  | -273.00 | 5000.00   | 0.534 | 0.436 |
| Ba <sub>8.04</sub> Cu <sub>4.9</sub> Si <sub>3.23</sub> Ge <sub>37.83</sub>                              | 466  | -89.80  | 77600.00  | 1.550 | 0.188 |
| (CaZn <sub>0.4</sub> Ag <sub>0.2</sub> Sb) <sub>0.83</sub> (LiZnSb) <sub>0.17</sub>                      | 673  | 185.86  | 20767.00  | 0.646 | 0.747 |
| Mg <sub>3</sub> Sb <sub>1.6</sub> Bi <sub>0.4</sub>                                                      | 750  | 186.40  | 1990.00   | 0.416 | 0.129 |
| Sr <sub>0.21</sub> Co <sub>4</sub> Sb <sub>12.25</sub>                                                   | 700  | -188.00 | 131818.00 | 3.620 | 0.901 |
| Cu <sub>2</sub> Se <sub>0.7</sub> S <sub>0.3</sub>                                                       | 333  | 53.47   | 126000.00 | 0.875 | 0.137 |
| Ta <sub>0.94</sub> Ti <sub>0.06</sub> FeSb                                                               | 570  | 202.40  | 116800.00 | 5.030 | 0.544 |
| Ca <sub>0.99</sub> Yb <sub>4.01</sub> Al <sub>2</sub> Sb <sub>5.84</sub> Ge <sub>0.16</sub>              | 373  | 218.87  | 1075.00   | 1.096 | 0.018 |
| NbCo <sub>0.9</sub> Ni <sub>0.1</sub> Sn                                                                 | 1001 | -210.72 | 48284.00  | 5.500 | 0.390 |
| Ca <sub>5</sub> Ga <sub>2</sub> Sb <sub>6</sub>                                                          | 525  | 274.57  | 863.00    | 1.005 | 0.036 |
| Cu <sub>5</sub> SnSbSe <sub>6.3</sub>                                                                    | 373  | 41.95   | 175862.00 | 2.672 | 0.043 |
| Sn <sub>0.93</sub> Pb <sub>0.06</sub> Zn <sub>0.01</sub> Se                                              | 773  | 402.00  | 5082.00   | 0.338 | 1.860 |
| Pb <sub>0.985</sub> Zn <sub>0.03</sub> Te                                                                | 520  | -265.30 | 29400.00  | 1.390 | 0.782 |
| GeSe <sub>0.65</sub> Te <sub>0.35</sub>                                                                  | 320  | 11.56   | 131716.00 | 1.888 | 0.003 |
| (Cu <sub>3</sub> SnS <sub>4</sub> ) <sub>0.895</sub> (Ga <sub>2</sub> Te <sub>3</sub> ) <sub>0.105</sub> | 746  | 138.30  | 63800.00  | 1.480 | 0.615 |
| Sn <sub>0.97</sub> Mn <sub>0.03</sub> Te                                                                 | 331  | 41.80   | 265089.00 | 6.342 | 0.024 |
| Ge <sub>0.85</sub> In <sub>0.05</sub> Pb <sub>0.1</sub> Te                                               | 475  | 248.40  | 27913.00  | 0.953 | 0.858 |
| YbCd <sub>1.4</sub> Zn <sub>0.6</sub> Sb <sub>2</sub>                                                    | 350  | 125.45  | 75926.00  | 1.670 | 0.250 |
| AgSb <sub>0.95</sub> Mn <sub>0.05</sub> Te <sub>2</sub>                                                  | 545  | 137.60  | 58400.00  | 1.095 | 0.550 |
| Cu <sub>22</sub> Sn <sub>9.25</sub> Sb <sub>0.75</sub> S <sub>32</sub>                                   | 300  | 62.79   | 171429.00 | 2.860 | 0.071 |
| Mg <sub>0.98</sub> Li <sub>0.02</sub> Ge <sub>0.9</sub> Si <sub>0.1</sub>                                | 500  | 290.94  | 13000.00  | 3.302 | 0.167 |
| Cu <sub>2</sub> Sn <sub>0.95</sub> Zn <sub>0.05</sub> S <sub>3</sub>                                     | 723  | 196.00  | 10000.00  | 0.492 | 0.565 |
| Cu <sub>2.94</sub> Ag <sub>0.06</sub> SbSe <sub>4</sub>                                                  | 573  | 368.00  | 5944.00   | 1.000 | 0.470 |
| Ge <sub>0.55</sub> Pb <sub>0.45</sub> Te <sub>0.3</sub> Se <sub>0.7</sub>                                | 668  | 296.25  | 6044.00   | 0.616 | 0.690 |
| FeNb <sub>0.9</sub> Zr <sub>0.1</sub> Sb                                                                 | 700  | 193.00  | 155040.00 | 8.068 | 0.501 |
| Ba <sub>0.9</sub> K <sub>0.1</sub> Zn <sub>2</sub> As <sub>2</sub>                                       | 423  | 37.04   | 168421.00 | 3.464 | 0.028 |
| GeTe                                                                                                     | 473  | 61.61   | 425000.00 | 5.091 | 0.150 |
| Ge <sub>0.83</sub> In <sub>0.05</sub> Pb <sub>0.12</sub> Te                                              | 425  | 254.45  | 16862.00  | 0.927 | 0.501 |
| Sm <sub>0.2</sub> Bi <sub>1.8</sub> Te <sub>3</sub>                                                      | 458  | -154.80 | 56600.00  | 0.690 | 0.920 |
| Tl <sub>4</sub> PbTe <sub>3</sub>                                                                        | 623  | 204.20  | 11200.00  | 0.521 | 0.558 |
| (Cu <sub>3</sub> SnS <sub>4</sub> ) <sub>0.85</sub> (Ga <sub>2</sub> Te <sub>3</sub> ) <sub>0.15</sub>   | 800  | 225.25  | 9856.00   | 0.717 | 0.558 |
| BaHoCo <sub>4</sub> O <sub>7</sub>                                                                       | 368  | 134.00  | 87.00     | 0.580 | 0.001 |
| Mg <sub>2.16</sub> (Si <sub>0.4</sub> Sn <sub>0.6</sub> ) <sub>0.99</sub> Bi <sub>0.01</sub>             | 400  | -175.40 | 107170.00 | 2.244 | 0.588 |
| CoAsSb                                                                                                   | 400  | -128.74 | 22690.00  | 2.817 | 0.053 |
| GeSe <sub>0.9</sub> Te <sub>0.1</sub>                                                                    | 776  | 185.04  | 4153.00   | 0.782 | 0.141 |
| Ca <sub>0.15</sub> BaGd <sub>1.85</sub> NiO <sub>5</sub>                                                 | 611  | 192.65  | 202.08    | 1.952 | 0.002 |
| Cu <sub>1.925</sub> Ag <sub>0.075</sub> SnSe <sub>3</sub>                                                | 300  | 100.00  | 13364.00  | 1.610 | 0.025 |
| Bi <sub>0.95</sub> Ba <sub>0.05</sub> CuSeO                                                              | 522  | 264.00  | 4275.00   | 0.695 | 0.224 |
| Ba <sub>0.38</sub> Co <sub>4</sub> Sb <sub>11.74</sub>                                                   | 850  | -137    | 204400.00 | 0.500 | 0.800 |
| Mg <sub>2.9875</sub> Na <sub>0.0125</sub> Sb <sub>2</sub>                                                | 323  | 100.00  | 24000.00  | 1.730 | 0.045 |

|                                                                                               |      |         |           |        |       |
|-----------------------------------------------------------------------------------------------|------|---------|-----------|--------|-------|
| Ag <sub>0.02</sub> Cu <sub>1.955</sub> S <sub>0.5</sub> Se <sub>0.5</sub>                     | 772  | 206.30  | 23088.00  | 0.761  | 1.211 |
| (Cu <sub>0.005</sub> Pb <sub>0.995</sub> Te)(MnTe) <sub>0.03</sub>                            | 623  | -145.09 | 107671.00 | 1.703  | 0.829 |
| Cu <sub>3</sub> ErTe <sub>3</sub>                                                             | 900  | 124.20  | 33333.00  | 0.620  | 0.746 |
| Ca <sub>0.25</sub> BaGd <sub>1.75</sub> NiO <sub>5</sub>                                      | 1087 | 162.50  | 442.74    | 1.263  | 0.010 |
| Ag(Bi <sub>0.9</sub> Pb <sub>0.1</sub> ) <sub>0.9</sub> Sb <sub>0.1</sub> Se <sub>2</sub>     | 378  | 538.89  | 272.83    | 0.527  | 0.057 |
| Pb <sub>0.985</sub> Zn <sub>0.03</sub> Te                                                     | 419  | -217.12 | 53200.00  | 1.787  | 0.588 |
| AgBi <sub>0.99</sub> Pb <sub>0.01</sub> Se <sub>2.12</sub>                                    | 300  | 565.13  | 142.40    | 0.556  | 0.025 |
| Bi <sub>1.2</sub> Sb <sub>0.8</sub> Se <sub>2.82</sub> Cl <sub>0.18</sub>                     | 300  | -92.00  | 36263.00  | 0.830  | 0.111 |
| Nd <sub>2.92</sub> Te <sub>4</sub>                                                            | 1073 | -96.54  | 93143.00  | 2.405  | 0.387 |
| Mg <sub>3.5</sub> Ho <sub>0.03</sub> Sb <sub>1.97</sub> Te <sub>0.03</sub>                    | 400  | -208.80 | 23829.00  | 0.955  | 0.435 |
| Cu <sub>1.85</sub> Se                                                                         | 399  | 22.99   | 467308.00 | 4.046  | 0.024 |
| Ag <sub>1.1</sub> Sb <sub>0.8</sub> Pb <sub>15.5</sub> Te <sub>22.6</sub>                     | 623  | 326.40  | 3940.00   | 0.908  | 0.288 |
| Ca <sub>0.2</sub> BaGd <sub>1.8</sub> NiO <sub>5</sub>                                        | 999  | 156.62  | 374.69    | 1.535  | 0.006 |
| Cu <sub>2.88</sub> Ag <sub>0.12</sub> SbSe <sub>4</sub>                                       | 623  | 346.00  | 7720.00   | 0.790  | 0.750 |
| Sb <sub>0.1</sub> Ge <sub>0.9</sub> Te                                                        | 473  | 214.07  | 46789.00  | 1.473  | 0.658 |
| In <sub>4</sub> Pb <sub>0.01</sub> Sn <sub>0.03</sub> Se <sub>2.9</sub> Cl <sub>0.02</sub>    | 673  | -262.40 | 13760.00  | 0.568  | 1.122 |
| FeVSb                                                                                         | 500  | -232.00 | 72000.00  | 7.220  | 0.268 |
| Sn <sub>0.97</sub> Pb <sub>0.01</sub> Cd <sub>0.025</sub> Se                                  | 373  | 337.00  | 2889.00   | 0.877  | 0.140 |
| Ag <sub>0.01</sub> Sn <sub>0.99</sub> Se <sub>0.8</sub> S <sub>0.2</sub>                      | 666  | 424.79  | 675.00    | 0.182  | 0.445 |
| Sr <sub>14.5</sub> Ga <sub>29.2</sub> Ge <sub>56.3</sub>                                      | 463  | -130.00 | 70237.00  | 1.572  | 0.350 |
| AgSn <sub>25.0</sub> BiTe <sub>27.0</sub>                                                     | 500  | 93.00   | 150000.00 | 2.870  | 0.226 |
| (CuI) <sub>0.003</sub> Bi <sub>2</sub> Te <sub>3</sub>                                        | 568  | -151.47 | 79900.00  | 1.729  | 0.602 |
| K <sub>0.98</sub> Ba <sub>0.02</sub> GaSb <sub>4</sub>                                        | 649  | -221.43 | 16330.00  | 0.648  | 0.802 |
| Sr <sub>0.16</sub> Yb <sub>0.03</sub> Co <sub>4</sub> Sb <sub>11.82</sub>                     | 600  | -168.00 | 185455.00 | 3.400  | 0.924 |
| Ge <sub>0.58</sub> Sb <sub>0.22</sub> Te <sub>0.8</sub> (AgSnSe <sub>2</sub> ) <sub>0.2</sub> | 723  | 181.40  | 51620.00  | 0.860  | 1.428 |
| Sn <sub>0.98</sub> Pb <sub>0.01</sub> Zn <sub>0.01</sub> Se                                   | 473  | 500.00  | 1560.00   | 0.905  | 0.204 |
| Mg <sub>3.5</sub> Ho <sub>0.01</sub> Sb <sub>2</sub>                                          | 500  | -290.07 | 2561.00   | 0.860  | 0.125 |
| Eu <sub>14</sub> MgBi <sub>11</sub>                                                           | 521  | 42.50   | 52143.00  | 1.626  | 0.030 |
| FeNb <sub>0.92</sub> Ti <sub>0.08</sub> Sb                                                    | 300  | 120.00  | 400000.00 | 13.000 | 0.133 |
| Bi <sub>1.2</sub> Sb <sub>0.8</sub> Se <sub>2.82</sub> Cl <sub>0.18</sub>                     | 400  | -116.00 | 28287.00  | 0.770  | 0.198 |
| CoSb <sub>3.0</sub>                                                                           | 723  | 137.00  | 16129.00  | 4.400  | 0.050 |
| Ca <sub>5</sub> Al <sub>1.9</sub> Zn <sub>0.1</sub> Sb <sub>6</sub>                           | 525  | 133.60  | 21640.00  | 1.175  | 0.174 |
| Ta <sub>0.88</sub> Ti <sub>0.12</sub> FeSb                                                    | 670  | 191.10  | 146657.00 | 4.310  | 0.836 |
| AgCuTe <sub>0.8</sub> Se <sub>0.2</sub>                                                       | 723  | 179.70  | 28835.00  | 0.615  | 1.093 |
| Cu <sub>12</sub> Sb <sub>4</sub> S <sub>13</sub>                                              | 425  | 87.51   | 97672.00  | 1.522  | 0.209 |
| Li <sub>1.01</sub> Co <sub>0.85</sub> Ni <sub>0.15</sub> O <sub>2</sub>                       | 723  | 321.00  | 20.36     | 0.996  | 0.002 |
| Tl <sub>4</sub> SnTe <sub>3</sub>                                                             | 623  | 200.00  | 13000.00  | 0.490  | 0.667 |
| Ca <sub>14</sub> MgBi <sub>11</sub>                                                           | 1013 | 91.79   | 33641.00  | 1.495  | 0.192 |
| In <sub>0.01</sub> Pb <sub>0.99</sub> Te <sub>0.999</sub> I <sub>0.001</sub>                  | 533  | -224.30 | 15560.00  | 1.395  | 0.299 |
| Ba <sub>0.5</sub> Cr <sub>5</sub> Se <sub>8</sub>                                             | 803  | 268.92  | 1640.00   | 0.851  | 0.112 |
| SnTe                                                                                          | 600  | 64.40   | 306730.00 | 5.610  | 0.136 |

|                                                                            |      |         |           |       |       |
|----------------------------------------------------------------------------|------|---------|-----------|-------|-------|
| (SnTe) <sub>15</sub> Sb <sub>2</sub> Te <sub>3</sub>                       | 523  | 100.34  | 170625.00 | 2.880 | 0.312 |
| SnTe                                                                       | 300  | 34.86   | 777885.00 | 7.950 | 0.036 |
| Sn <sub>0.97</sub> Pb <sub>0.02</sub> Zn <sub>0.01</sub> Se                | 473  | 507.09  | 1319.00   | 0.948 | 0.169 |
| Bi <sub>0.92</sub> Pb <sub>0.04</sub> Yb <sub>0.04</sub> CuSeO             | 350  | 149.00  | 16410.00  | 0.710 | 0.180 |
| Nd <sub>3</sub> Te <sub>4</sub>                                            | 973  | -71.00  | 157282.00 | 3.110 | 0.248 |
| (SnTe) <sub>15</sub> Sb <sub>2</sub> Te <sub>3</sub>                       | 423  | 74.20   | 228000.00 | 3.300 | 0.161 |
| Mg <sub>3.07</sub> Sb <sub>1.5</sub> Bi <sub>0.47</sub> Se <sub>0.03</sub> | 600  | -299.89 | 11414.00  | 0.682 | 0.903 |
| GeSe <sub>0.7</sub> Te <sub>0.3</sub>                                      | 320  | 13.84   | 101119.00 | 1.641 | 0.004 |
| Sb <sub>0.05</sub> Ge <sub>0.95</sub> Te                                   | 373  | 81.48   | 269725.00 | 3.491 | 0.191 |
| Cu <sub>3</sub> Sb <sub>0.997</sub> In <sub>0.003</sub> Se <sub>4</sub>    | 373  | 271.00  | 5900.00   | 1.950 | 0.083 |
| Nb <sub>0.8</sub> Ta <sub>0.2</sub> CoSn <sub>0.9</sub> Sb <sub>0.1</sub>  | 628  | -145.19 | 99574.00  | 4.345 | 0.303 |
| BaCu <sub>3.96</sub> S <sub>3.0</sub>                                      | 300  | 55.00   | 26856.00  | 0.685 | 0.036 |
| Ca <sub>5</sub> Al <sub>1.9</sub> Zn <sub>0.1</sub> Sb <sub>6</sub>        | 425  | 118.20  | 23770.00  | 1.270 | 0.111 |
| Ag <sub>0.94</sub> CuSe                                                    | 549  | 202.60  | 20065.00  | 0.616 | 0.734 |
| ZrNiPb                                                                     | 303  | -228.20 | 14590.00  | 7.669 | 0.030 |
| Cu <sub>2</sub> Se                                                         | 372  | 99.84   | 79524.00  | 0.708 | 0.417 |
| Nd <sub>2.9</sub> Te <sub>4</sub>                                          | 773  | -77.00  | 108000.00 | 2.430 | 0.190 |
| Ge <sub>0.55</sub> Pb <sub>0.45</sub> Te <sub>0.4</sub> Se <sub>0.6</sub>  | 569  | 295.00  | 6790.00   | 0.772 | 0.398 |
| Sn <sub>0.97</sub> Pb <sub>0.01</sub> Cd <sub>0.025</sub> Se               | 423  | 350.00  | 3111.00   | 0.788 | 0.205 |
| Sn <sub>0.96</sub> Pb <sub>0.03</sub> Zn <sub>0.01</sub> Se                | 300  | 443.66  | 3578.00   | 1.123 | 0.188 |
| Nb <sub>0.8</sub> Co <sub>0.92</sub> Ni <sub>0.08</sub> Sb                 | 299  | -106.30 | 80100.00  | 3.850 | 0.070 |
| Mg <sub>3.07</sub> Sb <sub>1.5</sub> Bi <sub>0.47</sub> Se <sub>0.03</sub> | 700  | -301.52 | 11448.00  | 0.656 | 1.111 |
| Li <sub>0.03</sub> Cu <sub>1.85</sub> Se                                   | 399  | 42.21   | 167308.00 | 2.313 | 0.051 |
| Tl <sub>9.0</sub> Bi <sub>0.96</sub> Te <sub>6.0</sub>                     | 385  | 167.80  | 28640.00  | 0.560 | 0.554 |
| Mg <sub>3.5</sub> Ho <sub>0.01</sub> Sb <sub>2</sub>                       | 400  | -245.77 | 2632.00   | 0.988 | 0.064 |
| S <sub>0.26</sub> Co <sub>4</sub> Sb <sub>11.11</sub> Te <sub>0.73</sub>   | 850  | -221    | 81000.00  | 0.900 | 1.500 |
| Cu <sub>2.88</sub> Ag <sub>0.12</sub> SbSe <sub>4</sub>                    | 523  | 397.00  | 6877.00   | 1.000 | 0.560 |
| BiCu <sub>0.925</sub> SeO                                                  | 523  | 270.00  | 1760.00   | 1.100 | 0.061 |
| BaBiTe <sub>3</sub>                                                        | 474  | -170.45 | 9563.00   | 0.434 | 0.303 |
| Ba <sub>0.08</sub> Yb <sub>0.09</sub> Co <sub>4</sub> Sb <sub>12</sub>     | 800  | -191.38 | 114400.00 | 2.466 | 1.300 |
| (Cu <sub>0.004</sub> Pb <sub>0.996</sub> Te)(MnTe) <sub>0.03</sub>         | 323  | -203.51 | 58483.00  | 1.795 | 0.436 |
| Li <sub>0.03</sub> Cu <sub>1.83</sub> Bi <sub>0.02</sub> Se                | 711  | 78.46   | 143678.00 | 2.018 | 0.312 |
| Gd <sub>2.75</sub> Se <sub>4</sub>                                         | 850  | -202.90 | 4340.00   | 0.743 | 0.204 |
| NbCo <sub>0.98</sub> Ni <sub>0.02</sub> Sn                                 | 704  | -167.65 | 52619.00  | 7.750 | 0.134 |
| Cu <sub>3</sub> SbSe <sub>4</sub>                                          | 372  | 391.30  | 3590.00   | 2.350 | 0.097 |
| SnTe <sub>0.1</sub> AgSbSe <sub>2</sub>                                    | 700  | 134.00  | 89000.00  | 1.903 | 0.588 |
| Bi <sub>0.96</sub> Ag <sub>0.04</sub> CuSeO                                | 823  | 340.00  | 2675.00   | 0.468 | 0.544 |
| Yb <sub>7</sub> Ca <sub>6</sub> BaMgSb <sub>11</sub>                       | 1200 | 233.80  | 10970.00  | 0.706 | 1.020 |
| Nb <sub>0.83</sub> CoSb                                                    | 1123 | -204.00 | 55880.00  | 1.930 | 0.900 |
| Sn <sub>0.98</sub> In <sub>0.02</sub> Se                                   | 773  | 378.00  | 582.00    | 0.670 | 0.098 |
| Al <sub>0.01</sub> Sb <sub>0.1</sub> Ge <sub>0.89</sub> Te                 | 323  | 151.34  | 54779.00  | 1.380 | 0.237 |

|                                                                                              |     |         |           |       |       |
|----------------------------------------------------------------------------------------------|-----|---------|-----------|-------|-------|
| Ce <sub>0.75</sub> Fe <sub>3</sub> CoSb <sub>12</sub>                                        | 693 | 95.60   | 91707.00  | 6.302 | 0.092 |
| (Sn <sub>0.985</sub> In <sub>0.015</sub> Te) <sub>0.9</sub> (AgCl) <sub>0.1</sub>            | 523 | 83.48   | 289888.00 | 3.322 | 0.318 |
| Ba <sub>8.01</sub> Ga <sub>15.88</sub> Zn <sub>0.009</sub> Sn <sub>30.11</sub>               | 580 | 424.30  | 7300.00   | 1.195 | 0.638 |
| Cu <sub>11.6</sub> Gd <sub>0.4</sub> Sb <sub>4</sub> S <sub>13</sub>                         | 525 | 106.94  | 95734.00  | 1.370 | 0.420 |
| SnS <sub>0.91</sub> Se <sub>0.09</sub>                                                       | 723 | 375.40  | 12200.00  | 0.873 | 1.424 |
| Bi <sub>0.92</sub> Pb <sub>0.08</sub> CuSeO                                                  | 100 | 39.60   | 189824.00 | 2.102 | 0.014 |
| Mg <sub>2.16</sub> (Si <sub>0.4</sub> Sn <sub>0.6</sub> ) <sub>0.98</sub> Bi <sub>0.02</sub> | 400 | -144.80 | 154100.00 | 2.520 | 0.513 |
| Hf <sub>0.8</sub> Ti <sub>0.2</sub> CoSb <sub>0.8</sub> Sn <sub>0.2</sub>                    | 480 | 192.90  | 54894.00  | 2.792 | 0.351 |
| Mg <sub>2</sub> Zn <sub>0.98</sub> Sb <sub>2</sub>                                           | 673 | 208.00  | 12632.00  | 0.842 | 0.437 |
| Ca <sub>10</sub> GaSb <sub>9</sub>                                                           | 473 | 45.90   | 314.00    | 0.648 | 0.000 |
| GeSe <sub>0.5</sub> Te <sub>0.5</sub>                                                        | 776 | 132.70  | 113806.00 | 2.310 | 0.673 |
| NbCo <sub>0.92</sub> Ni <sub>0.08</sub> Sn                                                   | 492 | -89.12  | 146190.00 | 8.285 | 0.069 |
| As <sub>2</sub> Te <sub>1.5</sub> Se <sub>1.5</sub>                                          | 473 | 543.80  | 32.95     | 0.324 | 0.014 |
| Ag(Bi <sub>0.85</sub> Nb <sub>0.15</sub> ) <sub>0.9</sub> Sb <sub>0.1</sub> Se <sub>2</sub>  | 676 | -167.00 | 17666.00  | 0.652 | 0.511 |
| Ca <sub>14</sub> MgBi <sub>11</sub>                                                          | 914 | 85.97   | 33333.00  | 1.400 | 0.161 |
| AgBi <sub>0.95</sub> Sb <sub>0.05</sub> Se <sub>2</sub>                                      | 500 | 175.53  | 141.00    | 0.446 | 0.005 |
| Cu <sub>3</sub> Sb <sub>0.997</sub> In <sub>0.003</sub> Se <sub>4</sub>                      | 423 | 284.00  | 6200.00   | 1.680 | 0.138 |
| CuGa <sub>0.99</sub> Mn <sub>0.01</sub> Te <sub>2</sub>                                      | 525 | 365.00  | 5700.00   | 2.589 | 0.154 |
| Rb <sub>7.88</sub> Au <sub>2.47</sub> Ge <sub>43.53</sub>                                    | 50  | -4.24   | 94.88     | 1.344 | 0.000 |
| Ca <sub>11</sub> Sb <sub>10</sub>                                                            | 701 | 14.96   | 2100.00   | 1.059 | 0.000 |
| Cu <sub>3.0</sub> SbSe <sub>4</sub>                                                          | 598 | 338.00  | 6670.00   | 1.060 | 0.440 |
| Bi <sub>2.0</sub> S <sub>2.85</sub> Se <sub>0.15</sub>                                       | 423 | -470.00 | 718.00    | 0.640 | 0.105 |
| Ba <sub>8</sub> Cu <sub>5.18</sub> Si <sub>9.98</sub> Ge <sub>30.85</sub>                    | 760 | -140.00 | 43500.00  | 1.660 | 0.390 |
| Mg <sub>2.16</sub> (Si <sub>0.4</sub> Sn <sub>0.6</sub> ) <sub>0.99</sub> Bi <sub>0.01</sub> | 500 | -198.60 | 90503.00  | 2.054 | 0.870 |
| Mg <sub>3</sub> Sb <sub>2</sub>                                                              | 332 | 193.00  | 207.00    | 1.340 | 0.002 |
| Ce <sub>0.2</sub> Bi <sub>1.8</sub> Te <sub>3</sub>                                          | 473 | -155.03 | 63090.00  | 0.569 | 1.260 |
| Yb <sub>10</sub> LaCdSb <sub>9</sub>                                                         | 973 | 59.49   | 37440.00  | 1.287 | 0.100 |
| Sr <sub>0.12</sub> Co <sub>4</sub> Sb <sub>12.46</sub>                                       | 850 | -180    | 62500.00  | 2.700 | 0.500 |
| Mg <sub>0.98</sub> Li <sub>0.02</sub> Ge <sub>0.9</sub> Si <sub>0.1</sub>                    | 400 | 272.80  | 11050.00  | 4.032 | 0.082 |
| Li <sub>2</sub> Ge <sub>3</sub> Sb <sub>2</sub> Te <sub>7</sub>                              | 573 | 247.40  | 26944.00  | 0.782 | 1.209 |
| In <sub>0.005</sub> Pb <sub>0.995</sub> Te <sub>0.998</sub> I <sub>0.002</sub>               | 533 | -238.20 | 21550.00  | 1.350 | 0.483 |
| Cu <sub>2</sub> CdSnSe <sub>4</sub>                                                          | 700 | 297.40  | 3103.00   | 1.012 | 0.190 |
| (SnTe) <sub>20</sub> Sb <sub>2</sub> Te <sub>3</sub>                                         | 673 | 135.64  | 114304.00 | 2.510 | 0.564 |
| ZrNiPb <sub>0.995</sub> Bi <sub>0.005</sub>                                                  | 871 | -180.40 | 83600.00  | 7.074 | 0.335 |
| Mo <sub>3</sub> Sb <sub>7</sub> I <sub>1.5</sub>                                             | 423 | 13.70   | 456500.00 | 4.710 | 0.008 |
| Ba <sub>0.08</sub> Yb <sub>0.09</sub> Co <sub>4</sub> Sb <sub>12.12</sub>                    | 300 | -126    | 206800.00 | 1.000 | 0.400 |
| Li <sub>1.1</sub> Co <sub>0.85</sub> Ni <sub>0.15</sub> O <sub>2</sub>                       | 323 | 146.00  | 0.78      | 1.939 | 0.000 |
| LiCo <sub>0.92</sub> Ni <sub>0.08</sub> O <sub>2</sub>                                       | 923 | 561.60  | 40.00     | 1.227 | 0.009 |
| Bi <sub>0.9</sub> Ag <sub>0.1</sub> CuSeO                                                    | 623 | 315.70  | 2030.00   | 0.495 | 0.255 |
| Bi <sub>0.875</sub> Ba <sub>0.125</sub> CuSeO                                                | 522 | 192.95  | 12452.00  | 0.783 | 0.327 |
| Pb <sub>0.99</sub> Tl <sub>0.005</sub> Na <sub>0.005</sub> Te                                | 696 | 273.20  | 25373.00  | 0.983 | 1.341 |



|                                                                                             |      |         |           |        |       |
|---------------------------------------------------------------------------------------------|------|---------|-----------|--------|-------|
| Ge <sub>9</sub> Sb <sub>2</sub> Te <sub>12</sub>                                            | 725  | 135.19  | 108182.00 | 2.535  | 0.565 |
| Ba <sub>0.97</sub> K <sub>0.03</sub> Zn <sub>2</sub> As <sub>2</sub>                        | 423  | 59.88   | 118519.00 | 2.908  | 0.062 |
| Sr <sub>14</sub> MgBi <sub>11</sub>                                                         | 621  | 72.99   | 53480.00  | 1.341  | 0.132 |
| Ba <sub>8.02</sub> Cu <sub>4.98</sub> Si <sub>35</sub> Ge <sub>5.99</sub>                   | 811  | -102.10 | 81700.00  | 2.408  | 0.287 |
| Bi <sub>0.9</sub> Ag <sub>0.1</sub> CuSeO                                                   | 723  | 325.00  | 2130.00   | 0.464  | 0.351 |
| Sr <sub>0.21</sub> Yb <sub>0.03</sub> Co <sub>4</sub> Sb <sub>12.12</sub>                   | 650  | -163.00 | 204091.00 | 3.640  | 0.968 |
| Sn <sub>1.03</sub> Se <sub>0.12</sub> Te <sub>0.865</sub> Br <sub>0.015</sub>               | 323  | 18.27   | 492105.00 | 4.585  | 0.012 |
| Mg <sub>3.07</sub> Sb <sub>1.5</sub> Bi <sub>0.45</sub> Se <sub>0.05</sub>                  | 500  | -305.65 | 9987.00   | 0.738  | 0.633 |
| Li <sub>2</sub> Ge <sub>11</sub> Sb <sub>2</sub> Te <sub>15</sub>                           | 373  | 100.00  | 179400.00 | 1.848  | 0.362 |
| Ag(Bi <sub>0.85</sub> Nb <sub>0.15</sub> ) <sub>0.9</sub> Sb <sub>0.1</sub> Se <sub>2</sub> | 478  | -141.00 | 19638.00  | 0.644  | 0.290 |
| Yb <sub>0.3</sub> Co <sub>4</sub> Sb <sub>12</sub>                                          | 300  | -138    | 198600.00 | 1.900  | 0.400 |
| Ag <sub>0.01</sub> Sn <sub>0.99</sub> Se <sub>0.9</sub> S <sub>0.1</sub>                    | 763  | 362.39  | 1708.00   | 0.223  | 0.767 |
| Ag <sub>0.02</sub> Cu <sub>1.955</sub> S <sub>0.5</sub> Se <sub>0.5</sub>                   | 578  | 149.50  | 24853.00  | 0.841  | 0.519 |
| Rb <sub>2</sub> Bi <sub>8</sub> Se <sub>12.974</sub> Cl <sub>0.026</sub>                    | 526  | -118.30 | 14490.00  | 0.732  | 0.146 |
| MgAgSb <sub>0.98</sub> In <sub>0.02</sub>                                                   | 550  | 154.55  | 90450.00  | 1.647  | 0.766 |
| Cu <sub>3</sub> Sb <sub>0.85</sub> Ge <sub>0.15</sub> S <sub>4</sub>                        | 300  | 114.40  | 51194.00  | 2.183  | 0.092 |
| (Cu <sub>0.005</sub> Pb <sub>0.995</sub> Te)(MnTe) <sub>0.03</sub>                          | 423  | -197.02 | 74110.00  | 1.621  | 0.751 |
| Ca <sub>0.15</sub> BaGd <sub>1.85</sub> NiO <sub>5</sub>                                    | 392  | 285.29  | 45.17     | 2.296  | 0.001 |
| ZrNiPb <sub>0.993</sub> Bi <sub>0.007</sub>                                                 | 303  | -156.40 | 174500.00 | 10.377 | 0.125 |
| Al <sub>0.01</sub> Sb <sub>0.1</sub> Ge <sub>0.89</sub> Te                                  | 823  | 245.97  | 59277.00  | 1.433  | 1.819 |
| Yb <sub>0.5</sub> Co <sub>4</sub> Sb <sub>12</sub>                                          | 300  | -109    | 254000.00 | 1.600  | 0.300 |
| Cu <sub>2.7</sub> Ag <sub>0.3</sub> ErTe <sub>3</sub>                                       | 500  | 56.00   | 228400.00 | 2.070  | 0.173 |
| BaBiTe <sub>2.9</sub> Se <sub>0.1</sub>                                                     | 525  | -199.20 | 4050.00   | 0.391  | 0.216 |
| Zn <sub>0.9</sub> Cd <sub>0.1</sub> Sc <sub>0.03</sub> O <sub>1.045</sub>                   | 873  | -133.00 | 32917.00  | 3.610  | 0.141 |
| Cu <sub>3</sub> P <sub>0.9</sub> Ge <sub>0.1</sub> S <sub>4</sub>                           | 400  | 143.70  | 7600.00   | 0.735  | 0.085 |
| Cu <sub>5</sub> SnSbSe <sub>6.58</sub>                                                      | 573  | 55.86   | 204310.00 | 3.385  | 0.108 |
| Bi <sub>0.875</sub> Ba <sub>0.125</sub> CuSeO                                               | 623  | 207.10  | 10770.00  | 0.743  | 0.402 |
| Yb <sub>8</sub> Ca <sub>5</sub> BaMgSb <sub>11</sub>                                        | 700  | 165.00  | 13500.00  | 0.608  | 0.423 |
| Ba <sub>0.98</sub> K <sub>0.02</sub> Zn <sub>2</sub> As <sub>2</sub>                        | 323  | 76.54   | 139130.00 | 2.844  | 0.093 |
| Bi <sub>0.875</sub> Ba <sub>0.125</sub> CuSeO                                               | 319  | 175.00  | 18942.00  | 0.956  | 0.194 |
| LaCo <sub>0.75</sub> Fe <sub>0.25</sub> O <sub>3</sub>                                      | 300  | 628.70  | 21.50     | 0.310  | 0.007 |
| Cu <sub>7</sub> PSe <sub>6</sub>                                                            | 623  | 220.00  | 3613.00   | 0.321  | 0.340 |
| Li <sub>2</sub> Ge <sub>3</sub> Sb <sub>2</sub> Te <sub>7</sub>                             | 473  | 240.00  | 27230.00  | 0.781  | 0.950 |
| Ba <sub>0.25</sub> Co <sub>4</sub> Sb <sub>11.91</sub>                                      | 300  | -145    | 131200.00 | 4.900  | 0.200 |
| Yb <sub>14</sub> MgSb <sub>11</sub>                                                         | 1083 | 237.00  | 12050.00  | 0.710  | 1.030 |
| Ba <sub>0.9</sub> K <sub>0.1</sub> Zn <sub>2</sub> As <sub>2</sub>                          | 723  | 87.70   | 92754.00  | 2.681  | 0.192 |
| Nd <sub>2.84</sub> Te <sub>4</sub>                                                          | 373  | -42.20  | 128600.00 | 1.934  | 0.044 |
| Ag(Bi <sub>0.85</sub> Pb <sub>0.15</sub> ) <sub>0.7</sub> Sb <sub>0.3</sub> Se <sub>2</sub> | 378  | 397.30  | 681.00    | 0.531  | 0.077 |
| As <sub>2</sub> Te <sub>2.8</sub> Se <sub>0.2</sub>                                         | 523  | 217.17  | 2275.80   | 0.532  | 0.106 |
| Cu <sub>3</sub> ErTe <sub>3</sub>                                                           | 300  | 39.30   | 293000.00 | 2.560  | 0.053 |
| LaCo <sub>0.5</sub> Fe <sub>0.5</sub> O <sub>3</sub>                                        | 300  | 655.45  | 5.30      | 0.220  | 0.002 |

|                                                                                             |     |         |           |       |       |
|---------------------------------------------------------------------------------------------|-----|---------|-----------|-------|-------|
| Ti <sub>0.9</sub> Mn <sub>0.1</sub> NiSn <sub>0.9</sub> Sb <sub>0.1</sub>                   | 598 | -113.60 | 263600.00 | 5.859 | 0.347 |
| Pb <sub>0.98</sub> Zn <sub>0.035</sub> Te                                                   | 618 | -276.30 | 27240.00  | 1.236 | 1.050 |
| Cu <sub>1.6</sub> S                                                                         | 450 | 24.00   | 385577.00 | 4.319 | 0.023 |
| Pb <sub>0.98</sub> Tl <sub>0.01</sub> Na <sub>0.01</sub> Te                                 | 397 | 155.52  | 73245.00  | 1.921 | 0.366 |
| Er <sub>0.01</sub> (Bi <sub>0.23</sub> Sb <sub>0.77</sub> ) <sub>1.99</sub> Te <sub>3</sub> | 450 | 222.11  | 33471.00  | 1.073 | 0.693 |
| Mg <sub>1.98</sub> Ag <sub>0.02</sub> Zn <sub>0.98</sub> Sb <sub>2</sub>                    | 473 | 133.33  | 41693.00  | 0.940 | 0.373 |
| Pb <sub>6</sub> Bi <sub>2</sub> Se <sub>9</sub>                                             | 423 | -112.80 | 23423.00  | 1.123 | 0.112 |
| Sn <sub>0.95</sub> Mn <sub>0.05</sub> Te                                                    | 524 | 69.92   | 289941.00 | 4.750 | 0.156 |
| Ag <sub>8</sub> Sn <sub>0.4</sub> Ga <sub>0.6</sub> Se <sub>6</sub>                         | 720 | -143.00 | 19670.00  | 0.305 | 0.950 |
| Cu <sub>2.2</sub> Se                                                                        | 295 | 77.23   | 145946.00 | 1.213 | 0.212 |
| Rb <sub>2</sub> Bi <sub>8</sub> Se <sub>12.9805</sub> Cl <sub>0.0195</sub>                  | 724 | -169.06 | 10368.00  | 0.623 | 0.344 |
| ZrNiPb <sub>0.985</sub> Bi <sub>0.015</sub>                                                 | 871 | -148.50 | 161052.00 | 7.230 | 0.428 |
| (PbTe) <sub>0.15</sub> (Ag <sub>2</sub> Te) <sub>0.85</sub>                                 | 650 | -214.40 | 11275.00  | 0.464 | 0.763 |
| (CaZn <sub>0.4</sub> Ag <sub>0.2</sub> Sb) <sub>0.91</sub> (LiZnSb) <sub>0.09</sub>         | 673 | 189.02  | 21078.00  | 0.738 | 0.687 |
| GeSe <sub>0.8</sub> Te <sub>0.2</sub>                                                       | 320 | 14.83   | 108955.00 | 2.014 | 0.004 |
| Se <sub>0.17</sub> Co <sub>4</sub> Sb <sub>11.31</sub> Te <sub>0.53</sub>                   | 850 | -220    | 76000.00  | 1.300 | 1.200 |
| AgSb <sub>0.95</sub> Mn <sub>0.05</sub> Te <sub>2</sub>                                     | 494 | 123.51  | 62000.00  | 1.073 | 0.435 |
| FeNb <sub>0.92</sub> Zr <sub>0.08</sub> Sb                                                  | 900 | 246.60  | 84500.00  | 6.525 | 0.709 |
| BaBiTe <sub>3</sub>                                                                         | 372 | -151.80 | 10350.00  | 0.452 | 0.196 |
| Bi <sub>2.0</sub> S <sub>2.79</sub> Se <sub>0.21</sub>                                      | 323 | -508.00 | 444.00    | 0.716 | 0.052 |
| Ba <sub>0.11</sub> Yb <sub>0.08</sub> Co <sub>4</sub> Sb <sub>12</sub>                      | 800 | -178.62 | 112600.00 | 2.320 | 1.239 |
| Ti <sub>0.99</sub> Mn <sub>0.01</sub> NiSn <sub>0.99</sub> Sb <sub>0.01</sub>               | 871 | -154.80 | 117881.00 | 5.893 | 0.418 |
| Ba <sub>8.01</sub> Ga <sub>15.83</sub> Zn <sub>0.019</sub> Sn <sub>30.15</sub>              | 500 | 485.42  | 4202.00   | 0.862 | 0.574 |
| Bi <sub>0.92</sub> Ag <sub>0.08</sub> CuSeO                                                 | 723 | 333.00  | 2310.00   | 0.411 | 0.451 |
| Ag <sub>2.0</sub> Se <sub>0.9</sub> Te <sub>0.1</sub>                                       | 345 | -134.66 | 101743.00 | 0.870 | 0.732 |
| BiSb(Se <sub>0.98</sub> Br <sub>0.02</sub> ) <sub>3</sub>                                   | 700 | -208.00 | 13776.00  | 0.530 | 0.787 |
| Cu <sub>2</sub> Se <sub>0.96</sub> S <sub>0.04</sub>                                        | 450 | 121.05  | 57192.00  | 0.942 | 0.400 |
| Ca <sub>10</sub> GaSb <sub>9</sub>                                                          | 673 | 85.82   | 727.00    | 0.613 | 0.006 |
| AgBi <sub>0.95</sub> Sb <sub>0.05</sub> Se <sub>2</sub>                                     | 600 | -112.00 | 209.40    | 0.334 | 0.005 |
| Sn <sub>0.95</sub> Mn <sub>0.05</sub> Te                                                    | 769 | 126.20  | 144400.00 | 3.170 | 0.558 |
| Cu <sub>5</sub> SnSbSe <sub>6.58</sub>                                                      | 723 | 78.62   | 141379.00 | 2.598 | 0.243 |
| In <sub>0.01</sub> Pb <sub>0.99</sub> Te <sub>0.994</sub> l <sub>0.006</sub>                | 428 | -186.51 | 49000.00  | 1.657 | 0.440 |
| Cu <sub>2</sub> Se <sub>0.5</sub> S <sub>0.5</sub>                                          | 707 | 119.30  | 58000.00  | 0.837 | 0.697 |
| Ca <sub>1.55</sub> Yb <sub>3.45</sub> Al <sub>2</sub> Sb <sub>6</sub>                       | 515 | 178.30  | 900.00    | 0.866 | 0.017 |
| Hf <sub>0.5</sub> Ti <sub>0.5</sub> CoSb <sub>0.8</sub> Sn <sub>0.2</sub>                   | 676 | 236.70  | 38160.00  | 2.467 | 0.592 |
| Bi <sub>0.96</sub> Ag <sub>0.04</sub> CuSeO                                                 | 573 | 283.47  | 1781.00   | 0.513 | 0.160 |
| In <sub>3.96</sub> Pb <sub>0.04</sub> Se <sub>3</sub>                                       | 330 | -192.00 | 7000.00   | 1.243 | 0.069 |
| CoSb <sub>3.0</sub>                                                                         | 673 | 139.00  | 15385.00  | 4.400 | 0.045 |
| Ag(Bi <sub>0.9</sub> Pb <sub>0.1</sub> ) <sub>0.7</sub> Sb <sub>0.3</sub> Se <sub>2</sub>   | 478 | 413.50  | 1059.00   | 0.637 | 0.136 |
| Cu <sub>10.5</sub> Ni <sub>0.5</sub> ZnSb <sub>4</sub> S <sub>13</sub>                      | 420 | 188.00  | 8765.00   | 0.446 | 0.292 |
| Cu <sub>2.075</sub> Sn <sub>0.925</sub> S <sub>3</sub>                                      | 400 | 47.11   | 281250.00 | 3.767 | 0.066 |

|                                                                                               |       |         |           |       |       |
|-----------------------------------------------------------------------------------------------|-------|---------|-----------|-------|-------|
| Hf <sub>0.5</sub> Ti <sub>0.5</sub> CoSb <sub>0.8</sub> Sn <sub>0.2</sub>                     | 885   | 241.00  | 38900.00  | 2.490 | 0.806 |
| Ca <sub>3</sub> Co <sub>3.8</sub> Ti <sub>0.2</sub> O <sub>9</sub>                            | 500   | 169.00  | 5305.00   | 2.306 | 0.033 |
| Ca <sub>0.15</sub> BaGd <sub>1.85</sub> NiO <sub>5</sub>                                      | 907   | 171.32  | 380.78    | 1.717 | 0.006 |
| GeSe <sub>0.6</sub> Te <sub>0.4</sub>                                                         | 430   | 70.80   | 168519.00 | 2.636 | 0.138 |
| Ca <sub>0.05</sub> BaGd <sub>1.95</sub> NiO <sub>5</sub>                                      | 1134  | 260.29  | 118.83    | 1.302 | 0.007 |
| Cu <sub>3</sub> Sb <sub>0.996</sub> In <sub>0.004</sub> Se <sub>4</sub>                       | 523   | 285.00  | 8010.00   | 1.274 | 0.267 |
| Cu <sub>3</sub> Sb <sub>0.95</sub> Ge <sub>0.05</sub> S <sub>4</sub>                          | 300   | 207.78  | 9368.00   | 2.000 | 0.061 |
| Cu <sub>2.2</sub> Sn <sub>0.8</sub> Sb <sub>0.2</sub> Se <sub>3.2</sub>                       | 622   | 87.43   | 129155.00 | 2.573 | 0.239 |
| BiCu <sub>0.90</sub> SeO                                                                      | 523   | 189.00  | 44.00     | 0.914 | 0.001 |
| Bi <sub>1.92</sub> Nb <sub>0.08</sub> Te <sub>3</sub>                                         | 306   | -96.58  | 115325.00 | 0.870 | 0.379 |
| Li <sub>2</sub> Ge <sub>11</sub> Sb <sub>2</sub> Te <sub>15</sub>                             | 473   | 144.00  | 140000.00 | 1.902 | 0.722 |
| In <sub>0.015</sub> Pb <sub>0.985</sub> Te <sub>0.998</sub> l <sub>0.002</sub>                | 663   | -233.20 | 15703.00  | 1.354 | 0.418 |
| Nd <sub>2.84</sub> Te <sub>4</sub>                                                            | 773   | -106.20 | 65060.00  | 1.721 | 0.330 |
| Zn <sub>0.95</sub> Cd <sub>0.05</sub> Sc <sub>0.02</sub> O <sub>1.03</sub>                    | 373   | -71.00  | 17600.00  | 9.750 | 0.003 |
| Ba <sub>0.10</sub> La <sub>0.05</sub> Yb <sub>0.20</sub> Co <sub>4</sub> Sb <sub>12</sub>     | 850   | -164    | 193800.00 | 0.100 | 1.300 |
| Nd <sub>2.84</sub> Te <sub>4</sub>                                                            | 1073  | -149.37 | 41162.00  | 1.404 | 0.702 |
| (Sn <sub>0.985</sub> In <sub>0.015</sub> Te) <sub>0.85</sub> (AgCl) <sub>0.15</sub>           | 723   | 115.07  | 155056.00 | 2.578 | 0.576 |
| Sn <sub>0.91</sub> Mn <sub>0.09</sub> Te <sub>0.98</sub> l <sub>0.02</sub>                    | 524   | 107.20  | 130256.00 | 2.568 | 0.305 |
| Ag(Bi <sub>0.85</sub> Nb <sub>0.15</sub> ) <sub>0.7</sub> Sb <sub>0.3</sub> Se <sub>2</sub>   | 576   | -214.00 | 6761.00   | 0.748 | 0.238 |
| Co <sub>4</sub> Sb <sub>11.7</sub> Te <sub>0.3</sub>                                          | 300   | -148    | 52300.00  | 4.800 | 0.100 |
| Cu <sub>2.2</sub> Se                                                                          | 374   | 105.90  | 85140.00  | 0.672 | 0.531 |
| (Sn <sub>0.8</sub> Ge <sub>0.2</sub> ) <sub>0.94</sub> Mn <sub>0.06</sub> Te                  | 373   | 54.60   | 252358.00 | 2.875 | 0.098 |
| As <sub>2</sub> Te <sub>2.8</sub> Se <sub>0.2</sub>                                           | 373   | 206.93  | 1279.80   | 0.605 | 0.034 |
| Tl <sub>4</sub> PbTe <sub>3</sub>                                                             | 673   | 234.50  | 9800.00   | 0.494 | 0.718 |
| Cu <sub>2.1</sub> Se                                                                          | 473   | 65.90   | 212200.00 | 2.438 | 0.179 |
| (Cu <sub>0.002</sub> Pb <sub>0.998</sub> Te)(MnTe) <sub>0.03</sub>                            | 723   | -198.07 | 51172.00  | 1.280 | 1.134 |
| Sn <sub>0.91</sub> Mn <sub>0.09</sub> Te <sub>0.98</sub> l <sub>0.02</sub>                    | 891   | 213.92  | 43077.00  | 1.481 | 1.186 |
| Na <sub>0.23</sub> Co <sub>4</sub> Sb <sub>12</sub>                                           | 700   | -237    | 61000.00  | 2.800 | 0.700 |
| Zn <sub>0.9</sub> Cd <sub>0.1</sub> Sc <sub>0.02</sub> O <sub>1.03</sub>                      | 673   | -107.60 | 43000.00  | 4.340 | 0.077 |
| Ge <sub>0.58</sub> Sb <sub>0.22</sub> Te <sub>0.8</sub> (AgSnSe <sub>2</sub> ) <sub>0.2</sub> | 423   | 178.88  | 41290.00  | 0.740 | 0.774 |
| Mg <sub>0.97</sub> Li <sub>0.03</sub> Ge <sub>0.9</sub> Si <sub>0.1</sub>                     | 500   | 248.99  | 26000.00  | 3.170 | 0.254 |
| Yb <sub>0.40</sub> Co <sub>4</sub> Sb <sub>12</sub>                                           | 300   | -120    | 234700.00 | 1.600 | 0.400 |
| BaBiTe <sub>2.95</sub> Se <sub>0.05</sub>                                                     | 373   | -165.70 | 7322.00   | 0.432 | 0.174 |
| Sn <sub>0.91</sub> Mn <sub>0.09</sub> Te                                                      | 622   | 112.50  | 134911.00 | 3.000 | 0.354 |
| Ba <sub>8</sub> Ga <sub>15.88</sub> Zn <sub>0.007</sub> Sn <sub>30.12</sub>                   | 380   | 360.00  | 14699.00  | 0.912 | 0.794 |
| Hf <sub>0.9</sub> Ti <sub>0.1</sub> CoSb <sub>0.8</sub> Sn <sub>0.2</sub>                     | 779   | 207.40  | 58582.00  | 3.240 | 0.600 |
| Ge <sub>0.98</sub> Mn <sub>0.01</sub> Sb <sub>0.01</sub> Te                                   | 598   | 106.13  | 172165.00 | 2.610 | 0.444 |
| YbCd <sub>1.9</sub> Zn <sub>0.1</sub> Sb <sub>2</sub>                                         | 550   | 185.20  | 43866.00  | 1.437 | 0.576 |
| (SnTe) <sub>0.96</sub> (CuSbTe <sub>2</sub> ) <sub>0.04</sub>                                 | 722   | 129.67  | 122800.00 | 2.770 | 0.538 |
| Ca <sub>1.18</sub> Yb <sub>3.82</sub> Al <sub>1.84</sub> In <sub>0.16</sub> Sb <sub>6</sub>   | 569.4 | 39.50   | 28970.00  | 2.608 | 0.010 |
| (Sn <sub>0.8</sub> Ge <sub>0.2</sub> ) <sub>0.94</sub> Mn <sub>0.06</sub> Te                  | 673   | 107.00  | 141100.00 | 2.210 | 0.492 |

|                                                                                             |     |         |           |       |       |
|---------------------------------------------------------------------------------------------|-----|---------|-----------|-------|-------|
| Ca <sub>5</sub> In <sub>1.9</sub> Zn <sub>0.1</sub> Sb <sub>6</sub>                         | 722 | 177.70  | 17869.00  | 0.842 | 0.477 |
| Ca <sub>5</sub> In <sub>2</sub> Sb <sub>6</sub>                                             | 422 | 479.50  | 974.00    | 0.866 | 0.109 |
| Nb <sub>0.85</sub> Ta <sub>0.15</sub> CoSn <sub>0.9</sub> Sb <sub>0.1</sub>                 | 924 | -171.24 | 78865.00  | 3.964 | 0.539 |
| In <sub>0.005</sub> Pb <sub>0.995</sub> Te <sub>0.994</sub> l <sub>0.006</sub>              | 428 | -160.20 | 72200.00  | 1.800 | 0.441 |
| Cu <sub>26</sub> V <sub>2</sub> Ge <sub>5</sub> Sb <sub>3</sub> S <sub>32</sub>             | 674 | 104.60  | 125900.00 | 2.297 | 0.404 |
| YbCd <sub>1.3</sub> Zn <sub>0.7</sub> Sb <sub>2</sub>                                       | 650 | 165.30  | 61650.00  | 1.172 | 0.934 |
| CuAgTe <sub>0.5</sub> Se <sub>0.5</sub>                                                     | 397 | 129.52  | 8395.00   | 0.299 | 0.187 |
| Tl <sub>8.99</sub> Bi <sub>1.01</sub> Te <sub>6.0</sub>                                     | 322 | 243.00  | 8350.00   | 0.396 | 0.401 |
| Mg <sub>1.98</sub> Li <sub>0.02</sub> Zn <sub>0.98</sub> Sb <sub>2</sub>                    | 300 | 77.25   | 100529.00 | 1.179 | 0.153 |
| Er <sub>0.03</sub> (Bi <sub>0.23</sub> Sb <sub>0.77</sub> ) <sub>1.97</sub> Te <sub>3</sub> | 400 | 234.63  | 41140.00  | 0.868 | 1.043 |
| Rb <sub>2</sub> Bi <sub>8</sub> Se <sub>12.9909</sub> Cl <sub>0.0091</sub>                  | 625 | -200.75 | 6471.00   | 0.521 | 0.313 |
| Ge <sub>0.55</sub> Pb <sub>0.45</sub> Te <sub>0.4</sub> Se <sub>0.6</sub>                   | 300 | 237.50  | 8088.00   | 0.908 | 0.151 |
| Zn <sub>0.875</sub> Cd <sub>0.125</sub> Sc <sub>0.02</sub> O <sub>1.03</sub>                | 300 | -73.50  | 42857.00  | 6.750 | 0.010 |
| Al <sub>0.005</sub> Sb <sub>0.1</sub> Ge <sub>0.895</sub> Te                                | 473 | 204.01  | 44578.00  | 1.437 | 0.611 |
| Ba <sub>0.07</sub> Co <sub>4</sub> Sb <sub>11.88</sub>                                      | 300 | -139    | 103200.00 | 5.800 | 0.100 |
| FeNb <sub>0.9</sub> Zr <sub>0.1</sub> Sb                                                    | 600 | 176.00  | 193798.00 | 8.729 | 0.413 |
| Ag(Bi <sub>0.9</sub> Nb <sub>0.1</sub> ) <sub>0.7</sub> Sb <sub>0.3</sub> Se <sub>2</sub>   | 526 | -274.00 | 2754.00   | 0.561 | 0.194 |
| Cu <sub>2</sub> Se <sub>0.96</sub> l <sub>0.04</sub>                                        | 425 | 121.00  | 39380.00  | 0.790 | 0.310 |
| Mg <sub>3.5</sub> Gd <sub>0.035</sub> Sb <sub>2</sub>                                       | 500 | -234.60 | 17972.00  | 0.927 | 0.533 |
| Al <sub>0.005</sub> Sb <sub>0.1</sub> Ge <sub>0.895</sub> Te                                | 773 | 253.21  | 54378.00  | 1.467 | 1.793 |
| YbCd <sub>1.6</sub> Zn <sub>0.4</sub> Sb <sub>2</sub>                                       | 350 | 122.22  | 84470.00  | 1.683 | 0.290 |
| Tl <sub>8.95</sub> Bi <sub>1.05</sub> Te <sub>6.0</sub>                                     | 504 | 80.00   | 1054.00   | 0.356 | 0.010 |
| Sn <sub>0.965</sub> Pb <sub>0.01</sub> Cd <sub>0.025</sub> Se                               | 300 | 314.57  | 2286.00   | 1.016 | 0.067 |
| Bi <sub>0.825</sub> Ba <sub>0.175</sub> CuSeO                                               | 522 | 176.92  | 16058.00  | 0.630 | 0.539 |
| Ba <sub>8.04</sub> Cu <sub>4.99</sub> Si <sub>18</sub> Ge <sub>22.98</sub>                  | 514 | -167.80 | 26350.00  | 1.360 | 0.281 |
| Ba <sub>1.7</sub> Bi <sub>0.3</sub> CoRuO <sub>6</sub>                                      | 518 | 29.40   | 123000.00 | 1.300 | 0.042 |
| Tl <sub>8.97</sub> Sb <sub>1.03</sub> Te <sub>6</sub>                                       | 504 | 200.80  | 20000.00  | 0.463 | 0.883 |
| Er <sub>0.03</sub> (Bi <sub>0.23</sub> Sb <sub>0.77</sub> ) <sub>1.97</sub> Te <sub>3</sub> | 450 | 221.42  | 35526.00  | 0.985 | 0.796 |
| AgCuTe <sub>0.8</sub> Se <sub>0.2</sub>                                                     | 522 | 178.56  | 23107.00  | 0.493 | 0.799 |
| Al <sub>0.005</sub> Sb <sub>0.1</sub> Ge <sub>0.895</sub> Te                                | 373 | 159.30  | 55261.00  | 1.515 | 0.349 |
| Co <sub>0.97</sub> Ni <sub>0.03</sub> GeTe                                                  | 551 | -117.02 | 72074.00  | 4.489 | 0.121 |
| Mg <sub>2</sub> Zn <sub>0.96</sub> Sb <sub>2</sub>                                          | 473 | 244.74  | 5695.00   | 0.655 | 0.247 |
| Bi <sub>0.98</sub> Pb <sub>0.02</sub> CuSeO                                                 | 100 | 79.38   | 86851.00  | 2.637 | 0.021 |
| BaBiTe <sub>3</sub>                                                                         | 524 | -178.93 | 9067.00   | 0.428 | 0.356 |
| Cu <sub>1.975</sub> S <sub>0.5</sub> Se <sub>0.5</sub>                                      | 673 | 160.00  | 38020.00  | 0.900 | 0.728 |
| BaGd <sub>2</sub> NiO <sub>5</sub>                                                          | 532 | 463.97  | 10.08     | 2.031 | 0.001 |
| Cu <sub>2</sub> Se <sub>0.88</sub> S <sub>0.12</sub>                                        | 372 | 142.30  | 36100.00  | 0.290 | 0.938 |
| (Sn <sub>0.985</sub> In <sub>0.015</sub> Te) <sub>0.95</sub> (AgCl) <sub>0.05</sub>         | 323 | 50.95   | 577528.00 | 5.567 | 0.087 |
| (Sn <sub>0.8</sub> Ge <sub>0.2</sub> ) <sub>0.8</sub> Mn <sub>0.2</sub> Te                  | 673 | 123.80  | 102700.00 | 1.567 | 0.673 |
| SnSe                                                                                        | 323 | 357.00  | 117.00    | 0.880 | 0.006 |
| GeSe <sub>0.8</sub> Te <sub>0.2</sub>                                                       | 530 | 27.44   | 71642.00  | 1.728 | 0.017 |

|                                                                                                                 |      |         |           |        |       |
|-----------------------------------------------------------------------------------------------------------------|------|---------|-----------|--------|-------|
| Ag <sub>0.97</sub> Cr <sub>0.95</sub> Bi <sub>0.05</sub> Se <sub>2</sub>                                        | 303  | 87.92   | 21364.00  | 0.536  | 0.093 |
| Ca <sub>0.15</sub> BaGd <sub>1.85</sub> NiO <sub>5</sub>                                                        | 811  | 167.65  | 332.24    | 1.779  | 0.004 |
| GeSe                                                                                                            | 524  | 841.25  | 15.25     | 1.461  | 0.004 |
| Cu <sub>2.9</sub> Ag <sub>0.1</sub> ErTe <sub>3</sub>                                                           | 800  | 104.00  | 50000.00  | 0.750  | 0.577 |
| Ag <sub>0.5</sub> Sb <sub>1.1</sub> Pb <sub>19.6</sub> Te <sub>18.8</sub>                                       | 623  | -136.00 | 31140.00  | 1.400  | 0.256 |
| Co <sub>9</sub> S <sub>8</sub>                                                                                  | 89   | -4.50   | 9728543   | 24.050 | 0.001 |
| (PbTe) <sub>0.05</sub> (Ag <sub>2</sub> Te) <sub>0.95</sub>                                                     | 450  | -117.30 | 50213.00  | 0.502  | 0.619 |
| Ge <sub>0.95</sub> Mn <sub>0.05</sub> Te                                                                        | 598  | 124.52  | 187629.00 | 2.791  | 0.623 |
| FeNb <sub>0.9</sub> Hf <sub>0.1</sub> Sb                                                                        | 500  | 153.40  | 323200.00 | 6.844  | 0.556 |
| Mg <sub>1.98</sub> Li <sub>0.02</sub> Zn <sub>0.98</sub> Sb <sub>2</sub>                                        | 373  | 92.06   | 83598.00  | 1.129  | 0.234 |
| Cu <sub>3</sub> Sb <sub>0.925</sub> Ge <sub>0.075</sub> S <sub>4</sub>                                          | 373  | 197.70  | 18700.00  | 1.560  | 0.175 |
| NbCo <sub>0.98</sub> Ni <sub>0.02</sub> Sn                                                                      | 804  | -177.65 | 47337.00  | 7.250  | 0.166 |
| Sr <sub>0.11</sub> Ba <sub>0.18</sub> Co <sub>4</sub> Sb <sub>12.09</sub>                                       | 450  | -123.00 | 309722.00 | 4.160  | 0.507 |
| (CaZn <sub>0.4</sub> Ag <sub>0.2</sub> Sb) <sub>0.87</sub> (LiZnSb) <sub>0.13</sub>                             | 371  | 122.00  | 44070.00  | 0.687  | 0.354 |
| Eu <sub>2</sub> ZnSb <sub>2</sub>                                                                               | 473  | 317.00  | 3027.00   | 0.400  | 0.360 |
| Eu(Zn <sub>0.7</sub> Cd <sub>0.3</sub> ) <sub>2</sub> Sb <sub>2</sub>                                           | 550  | 207.60  | 36640.00  | 1.230  | 0.706 |
| Mg <sub>3.07</sub> Sb <sub>1.5</sub> Bi <sub>0.46</sub> Se <sub>0.04</sub>                                      | 500  | -306.24 | 9823.00   | 0.682  | 0.675 |
| In <sub>3.95</sub> Pb <sub>0.05</sub> Se <sub>3</sub>                                                           | 518  | -259.00 | 10900.00  | 0.810  | 0.468 |
| Cu <sub>2.94</sub> Ag <sub>0.06</sub> SbSe <sub>4</sub>                                                         | 373  | 427.00  | 5288.00   | 1.650  | 0.218 |
| TlCr <sub>5</sub> Se <sub>8</sub>                                                                               | 523  | 267.00  | 5400.00   | 0.705  | 0.286 |
| Se <sub>0.15</sub> Co <sub>4</sub> Sb <sub>11.7</sub> Se <sub>0.3</sub>                                         | 300  | -300    | 7700.00   | 2.500  | 0.100 |
| Sn <sub>0.91</sub> Mn <sub>0.09</sub> Te <sub>0.99</sub> l <sub>0.01</sub>                                      | 720  | 161.86  | 91795.00  | 2.275  | 0.761 |
| SnTe <sub>0.1</sub> AgSbSe <sub>2</sub>                                                                         | 500  | 90.38   | 138255.00 | 2.290  | 0.248 |
| AgCuTe <sub>0.9</sub> Se <sub>0.1</sub>                                                                         | 522  | 195.30  | 23786.00  | 0.375  | 1.446 |
| Ba <sub>0.96</sub> K <sub>0.04</sub> Zn <sub>2</sub> As <sub>2</sub>                                            | 723  | 113.70  | 40506.00  | 1.602  | 0.236 |
| AgBi <sub>0.7</sub> Sb <sub>0.3</sub> Se <sub>2</sub>                                                           | 676  | -305.56 | 1231.00   | 0.329  | 0.236 |
| Cu <sub>3.0</sub> SbSe <sub>4</sub>                                                                             | 298  | 479.00  | 2546.00   | 2.750  | 0.063 |
| In <sub>4</sub> Se <sub>2.67</sub> Cl <sub>0.03</sub>                                                           | 698  | -218.70 | 26300.00  | 0.575  | 1.533 |
| Ge <sub>4</sub> Sb <sub>2</sub> Te <sub>7</sub>                                                                 | 673  | 121.00  | 78090.00  | 1.759  | 0.438 |
| Sn <sub>1.03</sub> Se <sub>0.08</sub> Te <sub>0.92</sub>                                                        | 623  | 91.57   | 154386.00 | 3.440  | 0.234 |
| Mg <sub>2</sub> Sn <sub>0.98</sub> Sb <sub>0.02</sub>                                                           | 350  | -86.29  | 460177.00 | 7.101  | 0.169 |
| CsTb <sub>2</sub> Ag <sub>3</sub> Te <sub>5</sub>                                                               | 298  | 21.30   | 244.44    | 0.534  | 0.000 |
| GeSe <sub>0.8</sub> Te <sub>0.2</sub>                                                                           | 678  | 38.51   | 74254.00  | 1.913  | 0.039 |
| (Ag <sub>0.1</sub> Sb <sub>0.1</sub> Sn <sub>0.8</sub> )(S <sub>0.1</sub> Se <sub>0.1</sub> Te <sub>0.8</sub> ) | 755  | 146.14  | 71963.00  | 1.432  | 0.810 |
| Nd <sub>2.78</sub> Te <sub>4</sub>                                                                              | 1073 | -204.50 | 23930.00  | 0.884  | 1.200 |
| AgBiSe <sub>2</sub>                                                                                             | 525  | 484.30  | 447.00    | 0.537  | 0.102 |
| Pb <sub>0.985</sub> Zn <sub>0.03</sub> Te                                                                       | 825  | -250.00 | 25855.00  | 1.119  | 1.200 |
| Cu <sub>11.7</sub> Gd <sub>0.3</sub> Sb <sub>4</sub> S <sub>13</sub>                                            | 623  | 117.51  | 99280.00  | 1.463  | 0.584 |
| Cu <sub>2.1</sub> Se                                                                                            | 672  | 104.50  | 131081.00 | 2.100  | 0.458 |
| BaBiTe <sub>2.9</sub> Se <sub>0.1</sub>                                                                         | 322  | -154.60 | 4240.00   | 0.413  | 0.079 |
| EuCd <sub>2</sub> Sb <sub>2</sub>                                                                               | 600  | 298.80  | 8110.00   | 0.765  | 0.568 |

|                                                                                                        |      |          |           |        |       |
|--------------------------------------------------------------------------------------------------------|------|----------|-----------|--------|-------|
| Cu <sub>2</sub> SnS <sub>3</sub>                                                                       | 623  | 423.00   | 207.00    | 0.984  | 0.023 |
| Ag <sub>0.97</sub> Cr <sub>0.99</sub> Bi <sub>0.01</sub> Se <sub>2</sub>                               | 303  | 77.75    | 22488.00  | 0.534  | 0.077 |
| Cu <sub>1.97</sub> In <sub>0.03</sub> Se                                                               | 770  | 237.31   | 20270.00  | 0.775  | 1.141 |
| Cu <sub>2</sub> Se <sub>0.92</sub> I <sub>0.08</sub>                                                   | 300  | 144.70   | 15720.00  | 0.474  | 0.208 |
| Li <sub>1.1</sub> Co <sub>0.85</sub> Ni <sub>0.15</sub> O <sub>2</sub>                                 | 423  | 183.00   | 2.07      | 2.800  | 0.000 |
| Cu <sub>2</sub> S <sub>0.5</sub> Se <sub>0.5</sub>                                                     | 578  | 186.26   | 4158.00   | 0.639  | 0.130 |
| AgSbTe <sub>2</sub>                                                                                    | 391  | 117.37   | 33600.00  | 0.961  | 0.188 |
| TiNiSn                                                                                                 | 526  | -145.12  | 71938.00  | 4.054  | 0.217 |
| Cu <sub>5</sub> SnSbSe <sub>7</sub>                                                                    | 723  | 74.71    | 206957.00 | 3.474  | 0.240 |
| ZrNiSn <sub>0.98</sub> Bi <sub>0.02</sub>                                                              | 475  | -178.50  | 45700.00  | 7.837  | 0.088 |
| AgBi <sub>0.97</sub> Pb <sub>0.03</sub> Se <sub>2.12</sub>                                             | 450  | 371.43   | 4864.00   | 0.617  | 0.489 |
| (SnTe) <sub>0.94</sub> (CuSbTe <sub>2</sub> ) <sub>0.06</sub>                                          | 621  | 95.00    | 159750.00 | 3.056  | 0.293 |
| Cu <sub>5</sub> SnSbSe <sub>6.79</sub>                                                                 | 723  | 76.90    | 175862.00 | 3.164  | 0.238 |
| CoS <sub>2</sub>                                                                                       | 89   | -30.00   | 1539044   | 14.750 | 0.008 |
| Se <sub>0.2</sub> Co <sub>4</sub> Sb <sub>11.6</sub> Se <sub>0.4</sub>                                 | 600  | -324     | 11400.00  | 1.800  | 0.400 |
| Gd <sub>2.79</sub> Se <sub>4</sub>                                                                     | 750  | -137.00  | 15440.00  | 1.255  | 0.170 |
| CsTb <sub>2</sub> Ag <sub>3</sub> Te <sub>5</sub>                                                      | 539  | 173.70   | 345.20    | 0.375  | 0.015 |
| Ca <sub>3.46</sub> Yb <sub>1.35</sub> Pr <sub>0.19</sub> Al <sub>2</sub> Sb <sub>6</sub>               | 323  | -119.64  | 271.00    | 1.647  | 0.001 |
| Cu <sub>2</sub> SnSe <sub>3</sub>                                                                      | 623  | 148.13   | 12245.00  | 1.310  | 0.128 |
| Ta <sub>0.84</sub> Ti <sub>0.16</sub> FeSb                                                             | 370  | 118.40   | 339300.00 | 5.168  | 0.342 |
| Sr <sub>0.21</sub> Yb <sub>0.03</sub> Co <sub>4</sub> Sb <sub>12.12</sub>                              | 400  | -127.00  | 287273.00 | 3.940  | 0.470 |
| Sn <sub>0.92</sub> Ge <sub>0.04</sub> As <sub>0.04</sub> Te                                            | 769  | 89.43    | 233333.00 | 3.862  | 0.592 |
| (Cu <sub>3</sub> SnS <sub>4</sub> ) <sub>0.85</sub> (Ga <sub>2</sub> Te <sub>3</sub> ) <sub>0.15</sub> | 331  | 78.79    | 58519.00  | 1.780  | 0.068 |
| ZrNiPb <sub>0.99</sub> Bi <sub>0.01</sub>                                                              | 673  | -189.40  | 129020.00 | 6.510  | 0.478 |
| Zn <sub>0.9</sub> Cd <sub>0.1</sub> Sc <sub>0.04</sub> O <sub>1.06</sub>                               | 373  | -93.00   | 44000.00  | 6.800  | 0.021 |
| Ag <sub>2.0</sub> Se <sub>0.5</sub> Te <sub>0.5</sub>                                                  | 390  | -108.00  | 61927.00  | 0.666  | 0.423 |
| Mg <sub>3.5</sub> Ho <sub>0.03</sub> Sb <sub>1.97</sub> Te <sub>0.03</sub>                             | 500  | -235.21  | 21306.00  | 0.880  | 0.670 |
| Ca <sub>3</sub> Al <sub>0.98</sub> Zn <sub>0.02</sub> Sb <sub>3</sub>                                  | 422  | 200.00   | 3150.00   | 1.103  | 0.046 |
| Hf <sub>0.7</sub> Ti <sub>0.3</sub> CoSb <sub>0.8</sub> Sn <sub>0.2</sub>                              | 305  | 158.80   | 55450.00  | 2.781  | 0.153 |
| Cu <sub>1.02</sub> Fe <sub>0.98</sub> S <sub>2</sub>                                                   | 30   | -1174.00 | 0.00      | 77.160 | 0.000 |
| SnSe <sub>0.8</sub> S <sub>0.2</sub>                                                                   | 300  | 198.42   | 402.00    | 1.267  | 0.004 |
| Sr <sub>0.21</sub> Co <sub>4</sub> Sb <sub>12.25</sub>                                                 | 500  | -162.00  | 165455.00 | 3.920  | 0.554 |
| GeTe                                                                                                   | 823  | 159.00   | 169643.00 | 2.960  | 1.161 |
| Nb <sub>0.88</sub> Hf <sub>0.12</sub> FeSb                                                             | 1200 | 246.10   | 82350.00  | 2.620  | 1.450 |
| As <sub>2</sub> Te <sub>2.6</sub> Se <sub>0.4</sub>                                                    | 473  | 263.50   | 2184.00   | 0.510  | 0.141 |
| Cu <sub>5</sub> Sn <sub>2</sub> Se <sub>7</sub>                                                        | 300  | 21.30    | 662800.00 | 5.280  | 0.017 |
| Tl <sub>4</sub> PbTe <sub>3</sub>                                                                      | 423  | 67.00    | 39900.00  | 0.823  | 0.088 |
| Li <sub>2</sub> Ge <sub>3</sub> Sb <sub>2</sub> Te <sub>7</sub>                                        | 673  | 251.33   | 26111.00  | 0.795  | 1.397 |
| Cr <sub>1.99</sub> Mn <sub>0.01</sub> Ge <sub>2</sub> Te <sub>6</sub>                                  | 614  | 315.46   | 3852.00   | 0.658  | 0.358 |
| Sr <sub>14.1</sub> Ga <sub>29.6</sub> Ge <sub>56.3</sub>                                               | 774  | -160.00  | 31185.00  | 1.891  | 0.327 |
| CuMo <sub>6</sub> Te <sub>8</sub>                                                                      | 800  | 23.92    | 172400.00 | 4.165  | 0.019 |

|                                                                                           |      |         |           |        |       |
|-------------------------------------------------------------------------------------------|------|---------|-----------|--------|-------|
| Ta <sub>0.88</sub> Ti <sub>0.12</sub> FeSb                                                | 470  | 148.40  | 244011.00 | 4.950  | 0.513 |
| LiCo <sub>0.96</sub> Ni <sub>0.04</sub> O <sub>2</sub>                                    | 623  | 926.90  | 0.65      | 1.773  | 0.000 |
| Nb <sub>0.85</sub> Ta <sub>0.15</sub> CoSn <sub>0.9</sub> Sb <sub>0.1</sub>               | 628  | -143.24 | 102837.00 | 4.428  | 0.299 |
| CuGa <sub>0.99</sub> Mn <sub>0.01</sub> Te <sub>2</sub>                                   | 718  | 247.30  | 25300.00  | 1.950  | 0.570 |
| Nd <sub>2.92</sub> Te <sub>4</sub>                                                        | 373  | -31.13  | 213158.00 | 2.699  | 0.029 |
| Ag <sub>2.0</sub> Se <sub>0.8</sub> Te <sub>0.2</sub>                                     | 330  | -126.50 | 96800.00  | 0.782  | 0.654 |
| Ag(Bi <sub>0.8</sub> Nb <sub>0.2</sub> ) <sub>0.7</sub> Sb <sub>0.3</sub> Se <sub>2</sub> | 526  | -222.00 | 4898.00   | 0.598  | 0.212 |
| Mo <sub>3</sub> Sb <sub>7</sub> I                                                         | 823  | 55.07   | 397325.00 | 6.520  | 0.155 |
| La <sub>0.2</sub> Ca <sub>0.8</sub> TiO <sub>3</sub>                                      | 740  | -132.70 | 54840.00  | 2.958  | 0.242 |
| CasIn <sub>1.95</sub> Zn <sub>0.05</sub> Sb <sub>6</sub>                                  | 722  | 214.00  | 12860.00  | 0.830  | 0.512 |
| Pb <sub>0.985</sub> Zn <sub>0.03</sub> Te                                                 | 318  | -171.20 | 105000.00 | 2.420  | 0.397 |
| Li <sub>0.03</sub> Cu <sub>1.8</sub> Bi <sub>0.05</sub> Se                                | 711  | 131.00  | 46200.00  | 1.010  | 0.558 |
| Cu <sub>5</sub> SnSbSe <sub>6.79</sub>                                                    | 673  | 66.67   | 210345.00 | 3.440  | 0.183 |
| In <sub>0.01</sub> Pb <sub>0.99</sub> Te <sub>0.994</sub> I <sub>0.006</sub>              | 533  | -195.24 | 37970.00  | 1.490  | 0.518 |
| Yb <sub>13.44</sub> Ce <sub>0.4</sub> Mn <sub>1.09</sub> Sb <sub>11.07</sub>              | 300  | 44.13   | 36727.00  | 0.750  | 0.029 |
| (SnTe) <sub>0.98</sub> (CuSbTe <sub>2</sub> ) <sub>0.02</sub>                             | 427  | 35.16   | 375837.00 | 6.235  | 0.032 |
| YbCd <sub>1.2</sub> Zn <sub>0.8</sub> Sb <sub>2</sub>                                     | 550  | 134.95  | 80311.00  | 1.347  | 0.620 |
| BaGd <sub>2</sub> NiO <sub>5</sub>                                                        | 426  | 525.00  | 4.67      | 2.382  | 0.000 |
| Cu <sub>0.99</sub> Pd <sub>0.01</sub> FeS <sub>2</sub>                                    | 100  | -248.85 | 2642.00   | 23.180 | 0.001 |
| Cu <sub>2</sub> Se <sub>0.92</sub> S <sub>0.08</sub>                                      | 353  | 116.12  | 77315.00  | 0.586  | 0.628 |
| (Sn <sub>0.8</sub> Ge <sub>0.2</sub> ) <sub>0.88</sub> Mn <sub>0.12</sub> Te              | 873  | 152.00  | 84786.00  | 1.677  | 1.013 |
| In <sub>0.075</sub> Co <sub>4</sub> Sb <sub>11.975</sub>                                  | 600  | -289    | 35000.00  | 2.100  | 0.700 |
| Rb <sub>2</sub> Bi <sub>8</sub> Se <sub>12.9909</sub> Cl <sub>0.0091</sub>                | 330  | -160.00 | 12500.00  | 0.660  | 0.160 |
| EuCd <sub>2</sub> Sb <sub>2</sub>                                                         | 450  | 286.40  | 8285.00   | 0.960  | 0.319 |
| Cu <sub>2</sub> Se <sub>0.96</sub> I <sub>0.04</sub>                                      | 375  | 133.60  | 27140.00  | 0.245  | 0.741 |
| Pb <sub>0.98</sub> Zn <sub>0.035</sub> Te                                                 | 520  | -253.53 | 33400.00  | 1.469  | 0.760 |
| Ag(Bi <sub>0.8</sub> Nb <sub>0.2</sub> ) <sub>0.9</sub> Sb <sub>0.1</sub> Se <sub>2</sub> | 576  | -147.00 | 20710.00  | 0.418  | 0.617 |
| Cu <sub>2.82</sub> Ag <sub>0.18</sub> SbSe <sub>4</sub>                                   | 423  | 392.00  | 6490.00   | 1.080  | 0.400 |
| Cu <sub>2.7</sub> Ag <sub>0.3</sub> ErTe <sub>3</sub>                                     | 400  | 47.80   | 260000.00 | 2.330  | 0.102 |
| Cu <sub>3</sub> Sb <sub>0.998</sub> In <sub>0.002</sub> Se <sub>4</sub>                   | 573  | 310.70  | 7300.00   | 1.120  | 0.361 |
| Ti <sub>0.98</sub> Mn <sub>0.02</sub> NiSn <sub>0.98</sub> Sb <sub>0.02</sub>             | 871  | -144.30 | 149670.00 | 5.852  | 0.470 |
| Bi <sub>0.48</sub> Sb <sub>1.52</sub> Te <sub>3</sub>                                     | 400  | 233.31  | 41620.00  | 1.420  | 0.638 |
| Yb <sub>13.6</sub> Ce <sub>0.363</sub> Mn <sub>0.99</sub> Sb <sub>11.05</sub>             | 1073 | 210.63  | 13686.00  | 0.743  | 0.877 |
| Sn <sub>0.975</sub> Pb <sub>0.01</sub> Cd <sub>0.015</sub> Se                             | 823  | 314.00  | 6254.00   | 0.534  | 0.950 |
| Cu <sub>5.133</sub> Sn <sub>1.866</sub> S <sub>6.3</sub> Cl <sub>0.7</sub>                | 529  | 96.59   | 72204.00  | 1.550  | 0.230 |
| ZrCoBi <sub>0.65</sub> Sb <sub>0.15</sub> Sn <sub>0.20</sub>                              | 303  | 129.90  | 150100.00 | 2.180  | 0.260 |
| Bi <sub>0.9</sub> Pb <sub>0.1</sub> CuSeO                                                 | 250  | 80.90   | 97650.00  | 2.102  | 0.076 |
| Eu(Zn <sub>0.5</sub> Cd <sub>0.5</sub> ) <sub>2</sub> Sb <sub>2</sub>                     | 550  | 236.00  | 21100.00  | 1.030  | 0.628 |
| Nd <sub>3</sub> Te <sub>4</sub>                                                           | 1173 | -85.00  | 132787.00 | 3.120  | 0.361 |
| Bi <sub>1.2</sub> Sb <sub>0.8</sub> Se <sub>2.88</sub> Cl <sub>0.12</sub>                 | 600  | -177.00 | 13700.00  | 0.670  | 0.384 |
| S <sub>0.18</sub> Co <sub>3.4</sub> Ni <sub>0.58</sub> Sb <sub>11.94</sub>                | 850  | -171    | 99000.00  | 1.700  | 0.700 |

|                                                                                                                     |      |         |           |       |       |
|---------------------------------------------------------------------------------------------------------------------|------|---------|-----------|-------|-------|
| (Ag <sub>0.05</sub> Sb <sub>0.05</sub> Sn <sub>0.9</sub> )(S <sub>0.05</sub> Se <sub>0.05</sub> Te <sub>0.9</sub> ) | 303  | 49.31   | 273832.00 | 3.392 | 0.059 |
| La <sub>0.5</sub> Co <sub>4</sub> Sb <sub>12</sub>                                                                  | 373  | 58.50   | 35355.00  | 2.186 | 0.021 |
| Cu <sub>2</sub> SnSe <sub>3</sub>                                                                                   | 372  | 192.57  | 1735.00   | 2.203 | 0.011 |
| Ba <sub>0.08</sub> Yb <sub>0.09</sub> Co <sub>4</sub> Sb <sub>12.12</sub>                                           | 800  | -190    | 116000.00 | 0.600 | 1.400 |
| Ti <sub>0.95</sub> Mn <sub>0.05</sub> NiSn <sub>0.95</sub> Sb <sub>0.05</sub>                                       | 498  | -126.50 | 216600.00 | 6.050 | 0.285 |
| Ba <sub>8</sub> Cu <sub>5.04</sub> Si <sub>13.01</sub> Ge <sub>27.96</sub>                                          | 517  | -99.50  | 69600.00  | 1.864 | 0.191 |
| Hf <sub>0.5</sub> Ti <sub>0.5</sub> CoSb <sub>0.8</sub> Sn <sub>0.2</sub>                                           | 305  | 178.80  | 43000.00  | 2.533 | 0.160 |
| Sn <sub>0.9</sub> Pb <sub>0.09</sub> Zn <sub>0.01</sub> Se                                                          | 673  | 563.21  | 630.50    | 0.559 | 0.241 |
| Bi <sub>0.9</sub> Ag <sub>0.1</sub> CuSeO                                                                           | 673  | 317.40  | 2106.00   | 0.484 | 0.295 |
| ZrNiSn <sub>0.98</sub> Bi <sub>0.02</sub>                                                                           | 771  | -210.00 | 60520.00  | 6.748 | 0.305 |
| Ge <sub>0.87</sub> In <sub>0.05</sub> Pb <sub>0.08</sub> Te                                                         | 525  | 217.14  | 50000.00  | 1.180 | 1.049 |
| Zn <sub>0.9</sub> Cd <sub>0.1</sub> Sc <sub>0.02</sub> O <sub>1.03</sub>                                            | 1073 | -150.00 | 29000.00  | 3.100 | 0.226 |
| CoGeTe                                                                                                              | 394  | -184.60 | 5320.00   | 7.341 | 0.010 |
| Zn <sub>0.85</sub> Cd <sub>0.15</sub> Sc <sub>0.02</sub> O <sub>1.03</sub>                                          | 300  | -49.40  | 19430.00  | 7.580 | 0.002 |
| Cu <sub>26</sub> V <sub>2</sub> Ge <sub>4</sub> Sb <sub>2</sub> S <sub>32</sub>                                     | 594  | 123.15  | 86508.00  | 1.824 | 0.427 |
| K <sub>8</sub> Al <sub>8</sub> Ge <sub>38</sub>                                                                     | 150  | -12.80  | 46000.00  | 0.937 | 0.001 |
| Cu <sub>12</sub> Sb <sub>4</sub> S <sub>13</sub>                                                                    | 422  | 107.20  | 26850.00  | 0.605 | 0.215 |
| Tl <sub>4</sub> SnTe <sub>3</sub>                                                                                   | 373  | 124.30  | 23700.00  | 0.464 | 0.286 |
| GeSe <sub>0.85</sub> Te <sub>0.15</sub>                                                                             | 630  | 36.69   | 53358.00  | 1.685 | 0.027 |
| Cu <sub>2.2</sub> Se                                                                                                | 770  | 196.53  | 35135.00  | 1.038 | 1.007 |
| LiCoO <sub>2</sub>                                                                                                  | 423  | 1052.40 | 0.19      | 7.591 | 0.000 |
| Cu <sub>2</sub> SnSe <sub>3</sub>                                                                                   | 400  | 107.58  | 17545.00  | 1.384 | 0.059 |
| Cu <sub>2</sub> Sn <sub>0.95</sub> Fe <sub>0.05</sub> Se <sub>3</sub>                                               | 323  | 55.48   | 115306.00 | 3.428 | 0.033 |
| Bi <sub>0.95</sub> Ba <sub>0.05</sub> CuSeO                                                                         | 623  | 273.00  | 4130.00   | 0.650 | 0.302 |
| Ge <sub>0.55</sub> Pb <sub>0.45</sub> Te <sub>0.4</sub> Se <sub>0.6</sub>                                           | 470  | 316.25  | 5500.00   | 0.791 | 0.360 |
| Bi <sub>0.96</sub> Pb <sub>0.02</sub> Yb <sub>0.02</sub> CuSeO                                                      | 343  | 138.00  | 27050.00  | 0.800 | 0.221 |
| Cu <sub>2</sub> SnS <sub>3</sub>                                                                                    | 323  | 283.00  | 132.00    | 2.380 | 0.001 |
| Cu <sub>22</sub> Sn <sub>9.25</sub> Sb <sub>0.75</sub> S <sub>32</sub>                                              | 500  | 96.36   | 111801.00 | 2.150 | 0.241 |
| Pb <sub>0.99</sub> Na <sub>0.01</sub> Te                                                                            | 301  | 58.75   | 235400.00 | 3.894 | 0.063 |
| PbZn <sub>0.015</sub> Te                                                                                            | 811  | -239.40 | 27000.00  | 1.137 | 1.097 |
| Cu <sub>2.94</sub> Ag <sub>0.06</sub> SbSe <sub>4</sub>                                                             | 398  | 430.00  | 4923.00   | 1.540 | 0.235 |
| Mg <sub>3</sub> Sb <sub>2</sub>                                                                                     | 470  | 261.00  | 392.00    | 1.130 | 0.011 |
| In <sub>3.99</sub> Pb <sub>0.01</sub> Se <sub>3</sub>                                                               | 330  | -206.00 | 10000.00  | 1.120 | 0.125 |
| Ag <sub>0.97</sub> CrSe <sub>2</sub>                                                                                | 403  | 96.61   | 21364.00  | 0.436 | 0.184 |
| K <sub>0.995</sub> Ba <sub>0.005</sub> GaSb <sub>4</sub>                                                            | 649  | -303.74 | 6490.00   | 0.520 | 0.747 |
| Er <sub>0.01</sub> (Bi <sub>0.23</sub> Sb <sub>0.77</sub> ) <sub>1.99</sub> Te <sub>3</sub>                         | 400  | 242.89  | 38353.00  | 0.928 | 0.975 |
| Mo <sub>3</sub> Sb <sub>7</sub> l <sub>0.75</sub>                                                                   | 523  | 31.56   | 511222.00 | 5.908 | 0.045 |
| CsTb <sub>2</sub> Ag <sub>3</sub> Te <sub>5</sub>                                                                   | 616  | 179.00  | 473.30    | 0.403 | 0.023 |
| AgBi <sub>0.9</sub> Sb <sub>0.1</sub> Se <sub>2</sub>                                                               | 526  | -211.11 | 7943.00   | 0.491 | 0.379 |
| As <sub>2</sub> Te <sub>1.5</sub> Se <sub>1.5</sub>                                                                 | 523  | 527.00  | 50.74     | 0.335 | 0.015 |
| Ge <sub>0.95</sub> Mn <sub>0.05</sub> Te                                                                            | 698  | 154.19  | 140200.00 | 2.396 | 0.971 |



|                                                                               |     |         |           |        |       |
|-------------------------------------------------------------------------------|-----|---------|-----------|--------|-------|
| $\text{Bi}_{0.92}\text{Ag}_{0.08}\text{CuSeO}$                                | 423 | 203.30  | 1910.00   | 0.484  | 0.069 |
| $\text{Ag}(\text{Bi}_{0.9}\text{Pb}_{0.1})_{0.7}\text{Sb}_{0.3}\text{Se}_2$   | 526 | 408.10  | 915.00    | 0.618  | 0.130 |
| $\text{Cu}_{11}\text{ZnSb}_4\text{S}_{13}$                                    | 621 | 185.27  | 10852.00  | 0.396  | 0.584 |
| $\text{As}_2\text{Te}_{2.3}\text{Se}_{0.7}$                                   | 298 | 326.53  | 28.53     | 0.532  | 0.004 |
| $\text{Cu}_{1.85}\text{Ag}_{0.15}\text{SnSe}_3$                               | 700 | 369.70  | 1867.00   | 0.349  | 0.512 |
| $\text{Ag}_2\text{Se}_{1.06}$                                                 | 309 | -142.98 | 110600.00 | 0.907  | 0.793 |
| $\text{Cu}_3\text{Sb}_{0.95}\text{Ge}_{0.05}\text{S}_4$                       | 573 | 286.70  | 7333.00   | 0.865  | 0.415 |
| $\text{Cu}_{1.99}\text{S}_{0.5}\text{Se}_{0.5}$                               | 578 | 153.13  | 10396.00  | 0.648  | 0.218 |
| $\text{CuAgTe}_{0.6}\text{Se}_{0.4}$                                          | 403 | 239.13  | 7398.00   | 0.362  | 0.471 |
| $\text{Yb}_{10}\text{LaCdSb}_9$                                               | 873 | 60.17   | 33669.00  | 1.000  | 0.106 |
| $\text{AgBi}_{0.95}\text{Sb}_{0.05}\text{Se}_2$                               | 525 | 341.15  | 241.00    | 0.458  | 0.032 |
| $\text{Cu}_{5.133}\text{Sn}_{1.866}\text{S}_7$                                | 515 | 42.61   | 313889.00 | 4.275  | 0.069 |
| $\text{PbZn}_{0.015}\text{Te}$                                                | 320 | -248.91 | 57200.00  | 2.075  | 0.550 |
| $\text{Sr}_{0.16}\text{Yb}_{0.03}\text{Co}_4\text{Sb}_{11.82}$                | 650 | -175.00 | 175909.00 | 3.400  | 1.030 |
| $\text{CuAgTe}_{0.7}\text{Se}_{0.3}$                                          | 303 | 215.49  | 11867.00  | 0.393  | 0.425 |
| $(\text{Sn}_{0.985}\text{In}_{0.015}\text{Te})_{0.85}(\text{AgCl})_{0.15}$    | 423 | 70.51   | 317978.00 | 3.589  | 0.186 |
| $\text{Ag}_{0.97}\text{Cr}_{0.99}\text{Sb}_{0.01}\text{Se}_2$                 | 403 | 88.98   | 19184.00  | 0.524  | 0.117 |
| $\text{Ag}_8\text{Sn}_{0.4}\text{Ga}_{0.6}\text{Se}_6$                        | 671 | -178.74 | 12046.00  | 0.304  | 0.849 |
| $\text{Bi}_{0.88}\text{Pb}_{0.06}\text{Yb}_{0.06}\text{CuSeO}$                | 850 | 212.00  | 12800.00  | 0.408  | 1.199 |
| $\text{Sn}_{0.91}\text{Mn}_{0.09}\text{Te}_{0.99}\text{I}_{0.01}$             | 524 | 106.70  | 154872.00 | 3.046  | 0.303 |
| $\text{Ta}_{0.92}\text{Ti}_{0.08}\text{FeSb}$                                 | 470 | 174.20  | 182600.00 | 5.465  | 0.479 |
| $\text{Ag}_{0.01}\text{Sn}_{0.99}\text{Se}_{0.85}\text{S}_{0.15}$             | 322 | 306.00  | 1116.00   | 0.210  | 0.161 |
| $\text{Cu}_5\text{Sn}_2\text{S}_6.65\text{Cl}_{0.35}$                         | 617 | 92.90   | 94958.00  | 1.850  | 0.273 |
| $\text{Cu}_{0.995}\text{Pd}_{0.005}\text{FeS}_2$                              | 100 | -450.38 | 1000.00   | 21.360 | 0.001 |
| $\text{Pb}_{0.9825}\text{Tl}_{0.0075}\text{Na}_{0.01}\text{Te}$               | 696 | 248.04  | 37308.00  | 1.067  | 1.498 |
| $\text{Ag}(\text{Bi}_{0.85}\text{Nb}_{0.15})_{0.9}\text{Sb}_{0.1}\text{Se}_2$ | 526 | -175.00 | 12523.00  | 0.636  | 0.317 |
| $\text{TiZr}_{0.025}\text{NiSn}$                                              | 424 | -180.00 | 40630.00  | 2.781  | 0.211 |
| $\text{CoSb}_{3.0}$                                                           | 573 | 117.00  | 6250.00   | 4.500  | 0.011 |
| $\text{MgAgSb}_{0.99}\text{In}_{0.01}$                                        | 350 | 170.36  | 62523.00  | 0.989  | 0.642 |
| $\text{Cu}_5\text{SnSbSe}_{6.79}$                                             | 373 | 37.59   | 385345.00 | 4.517  | 0.045 |
| $\text{Cu}_{1.7}\text{Se}$                                                    | 473 | 29.70   | 547297.00 | 5.416  | 0.042 |
| $\text{Mg}_{3.5}\text{Gd}_{0.02}\text{Sb}_2$                                  | 500 | -273.94 | 10926.00  | 0.851  | 0.482 |
| $(\text{CuI})_{0.003}\text{Bi}_2\text{Te}_3$                                  | 470 | -169.48 | 84100.00  | 1.452  | 0.782 |
| $\text{AgCuTe}_{0.5}\text{Se}_{0.5}$                                          | 623 | 155.70  | 2913.00   | 0.380  | 0.120 |
| $\text{AgBi}_{0.95}\text{Pb}_{0.05}\text{Se}_{2.12}$                          | 400 | 340.00  | 5497.00   | 0.658  | 0.386 |
| $\text{In}_4\text{Pb}_{0.01}\text{Sn}_{0.03}\text{Se}_{2.9}\text{Cl}_{0.06}$  | 623 | -249.50 | 10335.00  | 0.568  | 0.715 |
| $\text{Ca}_2\text{Yb}_9\text{Sb}_{10}$                                        | 608 | 10.67   | 117917.00 | 2.273  | 0.004 |
| $\text{Cu}_{2.05}\text{Cd}_{0.95}\text{SnSe}_4$                               | 700 | 171.00  | 14330.00  | 0.607  | 0.483 |
| $\text{Ca}_5\text{Ga}_{1.8}\text{Zn}_{0.2}\text{Sb}_6$                        | 773 | 109.25  | 35700.00  | 1.262  | 0.261 |
| $\text{BiCuSeO}$                                                              | 725 | 318.59  | 2864.00   | 0.540  | 0.363 |
| $\text{Al}_{0.0075}\text{Sb}_{0.1}\text{Ge}_{0.8925}\text{Te}$                | 773 | 260.50  | 52048.00  | 1.457  | 1.908 |

|                                                                                              |      |         |           |        |       |
|----------------------------------------------------------------------------------------------|------|---------|-----------|--------|-------|
| Cu <sub>3</sub> Sb <sub>0.9875</sub> Ge <sub>0.0125</sub> S <sub>4</sub>                     | 373  | 381.20  | 1922.00   | 1.480  | 0.070 |
| Mg <sub>2.16</sub> (Si <sub>0.4</sub> Sn <sub>0.6</sub> ) <sub>0.99</sub> Bi <sub>0.01</sub> | 800  | -238.80 | 55426.00  | 2.203  | 1.148 |
| Cu <sub>2.8</sub> Sn <sub>0.2</sub> Sb <sub>0.8</sub> Se <sub>3.8</sub>                      | 523  | 58.86   | 267516.00 | 4.250  | 0.114 |
| Cu <sub>1.975</sub> S <sub>0.5</sub> Se <sub>0.5</sub>                                       | 475  | 103.03  | 14926.00  | 0.733  | 0.103 |
| Eu(Zn <sub>0.7</sub> Cd <sub>0.3</sub> ) <sub>2</sub> Sb <sub>2</sub>                        | 450  | 187.60  | 44270.00  | 1.409  | 0.498 |
| CuMo <sub>6</sub> Te <sub>8</sub>                                                            | 400  | -2.33   | 200346.00 | 3.661  | 0.000 |
| CuFe <sub>0.96</sub> In <sub>0.04</sub> S <sub>2</sub>                                       | 600  | -369.05 | 3640.00   | 1.862  | 0.163 |
| (Bi <sub>0.23</sub> Sb <sub>0.77</sub> ) <sub>2</sub> Te <sub>3</sub>                        | 450  | 220.32  | 32706.00  | 1.052  | 0.679 |
| Ge <sub>0.98</sub> Mn <sub>0.01</sub> Sb <sub>0.01</sub> Te                                  | 648  | 130.00  | 140206.00 | 2.235  | 0.687 |
| Ca <sub>3.2</sub> Yb <sub>1.65</sub> Pr <sub>0.15</sub> Al <sub>2</sub> Sb <sub>6</sub>      | 323  | 46.40   | 2570.00   | 1.470  | 0.001 |
| La <sub>0.2</sub> Ca <sub>0.8</sub> TiO <sub>3</sub>                                         | 321  | -52.00  | 339247.00 | 4.273  | 0.069 |
| Cu <sub>2.88</sub> Ag <sub>0.12</sub> SbSe <sub>4</sub>                                      | 473  | 408.00  | 6282.00   | 1.090  | 0.454 |
| Ge <sub>0.55</sub> Pb <sub>0.45</sub> Te                                                     | 472  | 84.47   | 48000.00  | 2.031  | 0.080 |
| Cu <sub>22</sub> Sn <sub>9.25</sub> Sb <sub>0.75</sub> S <sub>32</sub>                       | 700  | 127.70  | 73171.00  | 1.655  | 0.505 |
| CoS <sub>2</sub>                                                                             | 66   | -32.60  | 2500000   | 14.170 | 0.012 |
| Bi <sub>0.96</sub> Pb <sub>0.02</sub> Yb <sub>0.02</sub> CuSeO                               | 847  | 221.05  | 9360.00   | 0.494  | 0.784 |
| Ag <sub>0.01</sub> Sn <sub>0.99</sub> Se <sub>0.8</sub> S <sub>0.2</sub>                     | 418  | 362.82  | 868.00    | 0.170  | 0.281 |
| Cu <sub>2.5</sub> Sn <sub>0.5</sub> Sb <sub>0.5</sub> Se <sub>3.5</sub>                      | 723  | 74.29   | 211300.00 | 3.486  | 0.242 |
| FeNb <sub>0.86</sub> Hf <sub>0.14</sub> Sb                                                   | 1100 | 220.00  | 106977.00 | 4.200  | 1.356 |
| (SnTe) <sub>15</sub> Sb <sub>2</sub> Te <sub>3</sub>                                         | 673  | 146.92  | 105443.00 | 2.180  | 0.703 |
| Gd <sub>2</sub> Se <sub>2.94</sub>                                                           | 350  | -84.70  | 35600.00  | 2.130  | 0.042 |
| Ag <sub>0.02</sub> Cr <sub>1.98</sub> Se <sub>3</sub>                                        | 405  | 118.14  | 32979.00  | 1.541  | 0.121 |
| (SnTe) <sub>40</sub> Sb <sub>2</sub> Te <sub>3</sub>                                         | 523  | 66.47   | 235414.00 | 4.386  | 0.124 |
| Mg <sub>1.98</sub> Ag <sub>0.02</sub> Zn <sub>0.98</sub> Sb <sub>2</sub>                     | 573  | 151.40  | 34921.00  | 0.915  | 0.501 |
| Hf <sub>0.8</sub> Ti <sub>0.2</sub> CoSb <sub>0.8</sub> Sn <sub>0.2</sub>                    | 987  | 226.60  | 48500.00  | 2.670  | 0.921 |
| Nb <sub>0.75</sub> Ta <sub>0.25</sub> CoSn <sub>0.9</sub> Sb <sub>0.1</sub>                  | 338  | -105.00 | 121986.00 | 4.603  | 0.099 |
| Bi <sub>2</sub> Si <sub>2</sub> Te <sub>6</sub>                                              | 573  | 182.00  | 8520.00   | 0.709  | 0.228 |
| Rb <sub>2</sub> Bi <sub>8</sub> Se <sub>12.9935</sub> Cl <sub>0.0065</sub>                   | 625  | -260.63 | 3824.00   | 0.474  | 0.343 |
| Ba <sub>0.11</sub> Yb <sub>0.03</sub> Co <sub>4</sub> Sb <sub>12</sub>                       | 400  | -136.55 | 150000.00 | 3.278  | 0.341 |
| Bi <sub>0.96</sub> Pb <sub>0.04</sub> CuSeO                                                  | 100  | 57.73   | 149712.00 | 2.344  | 0.021 |
| GeSe <sub>0.55</sub> Te <sub>0.45</sub>                                                      | 728  | 121.36  | 121269.00 | 2.279  | 0.571 |
| Al <sub>0.01</sub> Ge <sub>0.99</sub> Te                                                     | 573  | 94.20   | 287500.00 | 4.263  | 0.343 |
| AgBiSe <sub>2.0</sub>                                                                        | 418  | -145.00 | 20928.00  | 0.590  | 0.312 |
| Yb <sub>12</sub> CaBaMgSb <sub>11</sub>                                                      | 400  | 84.25   | 29599.00  | 0.693  | 0.121 |
| Mg <sub>3.5</sub> Gd <sub>0.035</sub> Sb <sub>2</sub>                                        | 300  | -190.10 | 21413.00  | 1.190  | 0.195 |
| Sn <sub>0.91</sub> Mn <sub>0.09</sub> Te <sub>0.99</sub> I <sub>0.01</sub>                   | 891  | 219.07  | 51282.00  | 1.595  | 1.374 |
| Ag <sub>2.0</sub> Se <sub>0.8</sub> Te <sub>0.2</sub>                                        | 345  | -126.64 | 99080.00  | 0.800  | 0.685 |
| Ba <sub>0.15</sub> Yb <sub>0.01</sub> Co <sub>4</sub> Sb <sub>12</sub>                       | 400  | -146.20 | 144000.00 | 4.040  | 0.319 |
| Ag <sub>3.8</sub> Mo <sub>9</sub> Se <sub>11</sub>                                           | 547  | 138.50  | 25900.00  | 0.820  | 0.331 |
| In <sub>0.015</sub> Pb <sub>0.985</sub> Te <sub>0.994</sub> I <sub>0.006</sub>               | 378  | -201.60 | 30470.00  | 1.735  | 0.270 |
| Mg <sub>2</sub> Zn <sub>1.04</sub> Sb <sub>2</sub>                                           | 573  | 95.39   | 3013.00   | 0.694  | 0.023 |

|                                                                                |      |         |           |        |       |
|--------------------------------------------------------------------------------|------|---------|-----------|--------|-------|
| FeNb <sub>0.92</sub> Zr <sub>0.08</sub> Sb                                     | 1000 | 258.74  | 72093.00  | 6.237  | 0.774 |
| CoSi                                                                           | 320  | -79.40  | 555190.00 | 13.694 | 0.082 |
| Sb <sub>0.05</sub> Ge <sub>0.95</sub> Te                                       | 773  | 208.90  | 90826.00  | 1.945  | 1.610 |
| Mg <sub>3.5</sub> Hg <sub>0.02</sub> Sb <sub>2</sub>                           | 600  | -313.64 | 8261.00   | 0.826  | 0.590 |
| In <sub>0.005</sub> Pb <sub>0.995</sub> Te <sub>0.996</sub> l <sub>0.004</sub> | 663  | -203.20 | 28100.00  | 1.425  | 0.540 |
| PbTe                                                                           | 821  | -264.13 | 13026.00  | 1.310  | 0.570 |
| FeNb <sub>0.88</sub> Hf <sub>0.12</sub> Sb                                     | 600  | 159.70  | 245740.00 | 5.590  | 0.673 |
| Ba <sub>0.15</sub> Yb <sub>0.01</sub> Co <sub>4</sub> Sb <sub>12</sub>         | 300  | -125.10 | 179700.00 | 4.350  | 0.194 |
| GeSe <sub>0.65</sub> Te <sub>0.35</sub>                                        | 530  | 24.10   | 85450.00  | 1.748  | 0.015 |
| As <sub>2</sub> Te <sub>3</sub>                                                | 373  | 47.52   | 585.95    | 0.725  | 0.001 |
| SnTe <sub>0.15</sub> AgSbSe <sub>2</sub>                                       | 300  | 60.90   | 161200.00 | 2.190  | 0.082 |
| GeSe <sub>0.9</sub> Te <sub>0.1</sub>                                          | 530  | 130.05  | 2245.00   | 1.223  | 0.016 |
| CoSb <sub>3.0</sub>                                                            | 523  | 25.60   | 4400.00   | 4.790  | 0.000 |
| Zn <sub>0.875</sub> Cd <sub>0.125</sub> Sc <sub>0.02</sub> O <sub>1.03</sub>   | 773  | -117.60 | 30100.00  | 3.580  | 0.088 |
| GeSe <sub>0.75</sub> Te <sub>0.25</sub>                                        | 776  | 120.60  | 60821.00  | 1.213  | 0.566 |
| Mg <sub>3.07</sub> Sb <sub>1.5</sub> Bi <sub>0.48</sub> Se <sub>0.02</sub>     | 700  | -302.17 | 11567.00  | 0.632  | 1.170 |
| AgSn <sub>25.0</sub> BiTe <sub>27.0</sub>                                      | 600  | 122.00  | 115385.00 | 2.530  | 0.407 |
| Sn <sub>1.03</sub> Te                                                          | 323  | 14.20   | 634211.00 | 9.176  | 0.005 |
| Cu <sub>22</sub> Sn <sub>9.25</sub> Sb <sub>0.75</sub> S <sub>32</sub>         | 400  | 79.02   | 138462.00 | 2.450  | 0.141 |
| Li <sub>1.04</sub> Co <sub>0.85</sub> Ni <sub>0.15</sub> O <sub>2</sub>        | 523  | 282.00  | 2.69      | 1.911  | 0.000 |
| NbCo <sub>0.9</sub> Ni <sub>0.1</sub> Sn                                       | 382  | -132.94 | 103529.00 | 9.262  | 0.075 |
| Ag <sub>0.94</sub> CuSe                                                        | 298  | -88.54  | 196825.00 | 1.667  | 0.284 |
| (Cu <sub>0.005</sub> Pb <sub>0.995</sub> Te)(MnTe) <sub>0.03</sub>             | 723  | -147.02 | 89178.00  | 1.643  | 0.848 |
| Bi <sub>0.42</sub> Sb <sub>1.58</sub> Te <sub>3</sub>                          | 573  | 155.20  | 26064.00  | 1.551  | 0.232 |
| Cu <sub>7</sub> PSe <sub>6</sub>                                               | 325  | 132.74  | 507.30    | 0.249  | 0.012 |
| Cu <sub>22</sub> Sn <sub>9</sub> Sb <sub>32</sub>                              | 600  | 126.45  | 62830.00  | 1.681  | 0.359 |
| AgBi <sub>0.99</sub> Pb <sub>0.01</sub> Se <sub>2.12</sub>                     | 350  | 579.00  | 173.84    | 0.539  | 0.038 |
| Tl <sub>8.98</sub> Sb <sub>1.02</sub> Te <sub>6</sub>                          | 326  | 113.00  | 42000.00  | 0.593  | 0.292 |
| Cu <sub>2</sub> Se <sub>0.96</sub> l <sub>0.04</sub>                           | 385  | 94.00   | 40986.00  | 0.644  | 0.216 |
| Ba <sub>7.97</sub> Ga <sub>15.95</sub> Sn <sub>30.08</sub>                     | 540  | 353.87  | 10560.00  | 1.020  | 0.700 |
| Rb <sub>2</sub> Bi <sub>8</sub> Se <sub>12.974</sub> Cl <sub>0.026</sub>       | 724  | -145.40 | 14338.00  | 0.703  | 0.312 |
| Cu <sub>26</sub> V <sub>2</sub> Ge <sub>6</sub> S <sub>32</sub>                | 497  | 49.08   | 302778.00 | 3.865  | 0.094 |
| Ag <sub>0.5</sub> Sb <sub>1.1</sub> Pb <sub>19.6</sub> Te <sub>18.8</sub>      | 523  | -49.60  | 26110.00  | 1.474  | 0.023 |
| Li <sub>1.01</sub> Co <sub>0.85</sub> Ni <sub>0.15</sub> O <sub>2</sub>        | 923  | 269.00  | 154.14    | 0.956  | 0.011 |
| CrSe <sub>3</sub>                                                              | 405  | 124.70  | 32900.00  | 1.771  | 0.117 |
| Sn <sub>1.03</sub> Se <sub>0.12</sub> Te <sub>0.875</sub> Br <sub>0.005</sub>  | 423  | 34.74   | 390351.00 | 4.195  | 0.048 |
| Mg <sub>2</sub> Sn <sub>0.98</sub> Sb <sub>0.02</sub>                          | 646  | -141.38 | 229200.00 | 4.674  | 0.633 |
| Bi <sub>2.0</sub> S <sub>3.0</sub>                                             | 723  | -501.00 | 346.00    | 0.440  | 0.143 |
| Ba <sub>0.05</sub> Yb <sub>0.09</sub> Co <sub>4</sub> Sb <sub>12</sub>         | 400  | -186.00 | 100000.00 | 2.750  | 0.510 |
| Cu <sub>2</sub> CdSnSe <sub>4</sub>                                            | 600  | 275.00  | 3450.00   | 1.250  | 0.125 |
| Cu <sub>1.7</sub> Se                                                           | 374  | 20.30   | 763514.00 | 5.963  | 0.020 |

|                                                                                          |      |         |           |       |       |
|------------------------------------------------------------------------------------------|------|---------|-----------|-------|-------|
| ZrCoBi <sub>0.65</sub> Sb <sub>0.15</sub> Sn <sub>0.20</sub>                             | 973  | 232.20  | 73580.00  | 1.590 | 1.420 |
| NbCo <sub>0.92</sub> Ni <sub>0.08</sub> Sn                                               | 804  | -129.71 | 98810.00  | 6.238 | 0.214 |
| Ba <sub>0.19</sub> In <sub>0.07</sub> Co <sub>4</sub> Sb <sub>11.85</sub>                | 850  | -199    | 93500.00  | 1.200 | 1.100 |
| Ca <sub>3.46</sub> Yb <sub>1.35</sub> Pr <sub>0.19</sub> Al <sub>2</sub> Sb <sub>6</sub> | 723  | -111.79 | 1604.00   | 1.295 | 0.011 |
| K <sub>8</sub> Al <sub>8</sub> Ge <sub>38</sub>                                          | 50   | -2.80   | 49139.00  | 0.708 | 0.000 |
| YbCd <sub>1.1</sub> Zn <sub>0.9</sub> Sb <sub>2</sub>                                    | 350  | 86.30   | 135370.00 | 1.707 | 0.192 |
| Tl <sub>8.99</sub> Bi <sub>1.01</sub> Te <sub>6.0</sub>                                  | 499  | 307.00  | 4300.00   | 0.322 | 0.628 |
| Cu <sub>2</sub> Se <sub>0.7</sub> S <sub>0.3</sub>                                       | 769  | 145.54  | 42000.00  | 0.744 | 0.920 |
| As <sub>2</sub> Te <sub>3</sub>                                                          | 473  | 36.63   | 1154.78   | 0.672 | 0.001 |
| Eu <sub>2</sub> Zn <sub>0.98</sub> Sb <sub>2</sub>                                       | 473  | 197.00  | 13470.00  | 0.460 | 0.538 |
| Cu <sub>1.975</sub> S <sub>0.5</sub> Se <sub>0.5</sub>                                   | 300  | 99.39   | 15891.00  | 0.502 | 0.094 |
| Ca <sub>0.25</sub> BaGd <sub>1.75</sub> NiO <sub>5</sub>                                 | 1179 | 175.74  | 480.92    | 1.278 | 0.014 |
| CsSm <sub>2</sub> Ag <sub>3</sub> Te <sub>5</sub>                                        | 616  | 197.69  | 358.52    | 0.463 | 0.019 |
| Zn <sub>0.9</sub> Cd <sub>0.1</sub> Sc <sub>0.04</sub> O <sub>1.06</sub>                 | 873  | -141.40 | 28125.00  | 3.560 | 0.138 |
| SnTe <sub>0.25</sub> AgSbSe <sub>2</sub>                                                 | 650  | 139.20  | 73100.00  | 1.590 | 0.579 |
| NbCo <sub>0.94</sub> Ni <sub>0.06</sub> Sn                                               | 697  | -85.59  | 128372.00 | 7.202 | 0.091 |
| Bi <sub>2</sub> Te <sub>3</sub>                                                          | 398  | -147.44 | 98421.00  | 0.842 | 1.012 |
| Tl <sub>9.0</sub> Bi <sub>0.96</sub> Te <sub>6.0</sub>                                   | 325  | 148.40  | 36000.00  | 0.650 | 0.396 |
| Cu <sub>3</sub> Sb <sub>0.997</sub> In <sub>0.003</sub> Se <sub>4</sub>                  | 623  | 286.00  | 8950.00   | 1.010 | 0.452 |
| Dy <sub>0.02</sub> Co <sub>4</sub> Sb <sub>12</sub>                                      | 300  | -268    | 25800.00  | 5.200 | 0.100 |
| In <sub>4</sub> Se <sub>2.67</sub> Cl <sub>0.03</sub>                                    | 473  | -151.20 | 50000.00  | 0.683 | 0.792 |
| ZrNiPb <sub>0.985</sub> Bi <sub>0.015</sub>                                              | 771  | -158.00 | 171250.00 | 7.114 | 0.465 |
| Ta <sub>0.96</sub> Ti <sub>0.04</sub> FeSb                                               | 970  | 299.00  | 36100.00  | 3.845 | 0.814 |
| Yb <sub>11</sub> Ca <sub>2</sub> BaMgSb <sub>11</sub>                                    | 800  | 170.00  | 15160.00  | 0.672 | 0.522 |
| CuGa <sub>0.99</sub> Mn <sub>0.01</sub> Te <sub>2</sub>                                  | 818  | 232.60  | 27900.00  | 1.752 | 0.707 |
| CsSm <sub>2</sub> Ag <sub>3</sub> Te <sub>5</sub>                                        | 539  | 189.35  | 188.24    | 0.483 | 0.008 |
| Ba <sub>8</sub> Cu <sub>5</sub> Si <sub>25</sub> Ge <sub>16</sub>                        | 809  | -112.00 | 65700.00  | 2.050 | 0.324 |
| Li <sub>1.04</sub> Co <sub>0.85</sub> Ni <sub>0.15</sub> O <sub>2</sub>                  | 823  | 297.00  | 87.02     | 1.332 | 0.005 |
| La <sub>0.15</sub> Ca <sub>0.85</sub> TiO <sub>3</sub>                                   | 640  | -126.00 | 48925.00  | 3.210 | 0.155 |
| Sn <sub>0.91</sub> Mn <sub>0.09</sub> Te <sub>0.97</sub> l <sub>0.03</sub>               | 891  | 215.46  | 44615.00  | 1.553 | 1.188 |
| Ca <sub>0.25</sub> BaGd <sub>1.75</sub> NiO <sub>5</sub>                                 | 486  | 212.50  | 72.46     | 1.274 | 0.001 |
| Cu <sub>3</sub> P <sub>0.9</sub> Ge <sub>0.1</sub> S <sub>4</sub>                        | 500  | 177.00  | 7940.00   | 0.675 | 0.184 |
| Ag <sub>0.8</sub> Sb <sub>0.8</sub> Pb <sub>18.3</sub> Te <sub>20.0</sub>                | 473  | -315.00 | 6900.00   | 0.810 | 0.380 |
| Sn <sub>1.03</sub> Se <sub>0.12</sub> Te <sub>0.88</sub>                                 | 723  | 135.00  | 85088.00  | 2.296 | 0.488 |
| Tl <sub>0.7</sub> Co <sub>4</sub> Sn <sub>0.75</sub> Sb <sub>11.25</sub>                 | 200  | -40.88  | 46544.00  | 2.290 | 0.007 |
| Bi <sub>0.84</sub> Pb <sub>0.08</sub> Yb <sub>0.08</sub> CuSeO                           | 347  | 89.14   | 27429.00  | 0.728 | 0.104 |
| Ba <sub>8</sub> Cu <sub>5</sub> Si <sub>25</sub> Ge <sub>16</sub>                        | 415  | -66.20  | 107000.00 | 1.880 | 0.104 |
| Bi <sub>0.8</sub> Pb <sub>0.1</sub> Yb <sub>0.1</sub> CuSeO                              | 744  | 158.50  | 10213.00  | 0.510 | 0.374 |
| LiCo <sub>0.85</sub> Ni <sub>0.15</sub> O <sub>2</sub>                                   | 823  | 406.85  | 96.11     | 1.477 | 0.009 |
| Gd <sub>2.75</sub> Se <sub>4</sub>                                                       | 350  | -93.12  | 7107.00   | 0.879 | 0.025 |
| (Hf <sub>0.3</sub> Zr <sub>0.7</sub> ) <sub>0.88</sub> Nb <sub>0.12</sub> CoSb           | 1123 | -228.20 | 45100.00  | 2.220 | 0.850 |

|                                                                                               |      |         |           |        |       |
|-----------------------------------------------------------------------------------------------|------|---------|-----------|--------|-------|
| Ba <sub>8.01</sub> Ga <sub>15.83</sub> Zn <sub>0.019</sub> Sn <sub>30.15</sub>                | 380  | 449.30  | 4709.00   | 0.787  | 0.459 |
| (Cu <sub>0.003</sub> Pb <sub>0.997</sub> Te)(MnTe) <sub>0.03</sub>                            | 623  | -151.40 | 90822.00  | 1.669  | 0.777 |
| Se <sub>0.3</sub> Co <sub>4</sub> Sb <sub>11.4</sub> Se <sub>0.6</sub>                        | 750  | -233    | 21400.00  | 1.900  | 0.400 |
| Bi <sub>2</sub> Si <sub>2</sub> Te <sub>6</sub>                                               | 673  | 153.00  | 7454.00   | 0.679  | 0.173 |
| (PbTe) <sub>0.1</sub> (Ag <sub>2</sub> Te) <sub>0.9</sub>                                     | 350  | -95.00  | 127450.00 | 0.784  | 0.515 |
| Ba <sub>0.15</sub> In <sub>0.20</sub> Co <sub>4</sub> Sb <sub>11.84</sub>                     | 850  | -198    | 97700.00  | 1.100  | 1.200 |
| Ce <sub>0.2</sub> Bi <sub>1.8</sub> Te <sub>3</sub>                                           | 423  | -150.18 | 72257.00  | 0.539  | 1.280 |
| Ba <sub>0.98</sub> K <sub>0.02</sub> Zn <sub>2</sub> As <sub>2</sub>                          | 623  | 130.00  | 62745.00  | 1.851  | 0.357 |
| NbCo <sub>0.98</sub> Ni <sub>0.02</sub> Sn                                                    | 387  | -127.65 | 84286.00  | 10.548 | 0.050 |
| Zn <sub>0.85</sub> Cd <sub>0.15</sub> Sc <sub>0.02</sub> O <sub>1.03</sub>                    | 1073 | -128.00 | 13800.00  | 3.250  | 0.075 |
| Yb <sub>13.43</sub> Ce <sub>0.44</sub> Mn <sub>1.07</sub> Sb <sub>11.07</sub>                 | 973  | 217.70  | 13700.00  | 0.619  | 1.021 |
| Ag <sub>3.4</sub> Mo <sub>9</sub> Se <sub>11</sub>                                            | 447  | 87.00   | 48800.00  | 1.225  | 0.135 |
| Tl <sub>9.0</sub> Bi <sub>0.95</sub> Te <sub>6.0</sub>                                        | 443  | 182.20  | 24460.00  | 0.520  | 0.692 |
| Ge <sub>0.55</sub> Sb <sub>0.25</sub> Te <sub>0.8</sub> (AgSnSe <sub>2</sub> ) <sub>0.2</sub> | 323  | 167.70  | 34839.00  | 0.757  | 0.427 |
| Sn <sub>0.91</sub> Mn <sub>0.09</sub> Te <sub>0.97</sub> l <sub>0.03</sub>                    | 622  | 138.66  | 104615.00 | 2.409  | 0.519 |
| Mg <sub>3.5</sub> Gd <sub>0.045</sub> Sb <sub>2</sub>                                         | 400  | -213.93 | 22244.00  | 1.045  | 0.390 |
| AgSn <sub>25.0</sub> BiTe <sub>27.0</sub>                                                     | 400  | 66.00   | 200000.00 | 3.190  | 0.109 |
| Zn <sub>0.9</sub> Cd <sub>0.1</sub> Sc <sub>0.006</sub> O <sub>1.009</sub>                    | 773  | -122.00 | 36700.00  | 4.230  | 0.100 |
| Ag <sub>0.9</sub> Sb <sub>0.9</sub> Pb <sub>18.3</sub> Te <sub>19.9</sub>                     | 523  | -296.00 | 8625.00   | 0.858  | 0.461 |
| Hf <sub>0.9</sub> Ti <sub>0.1</sub> CoSb <sub>0.8</sub> Sn <sub>0.2</sub>                     | 305  | 141.10  | 81000.00  | 3.450  | 0.142 |
| Gd <sub>2.79</sub> Se <sub>4</sub>                                                            | 450  | -86.20  | 19360.00  | 1.283  | 0.050 |
| Sb <sub>0.05</sub> Ge <sub>0.95</sub> Te                                                      | 323  | 66.67   | 319444.00 | 3.691  | 0.124 |
| GeSe <sub>0.65</sub> Te <sub>0.35</sub>                                                       | 776  | 123.05  | 86194.00  | 1.607  | 0.630 |
| Al <sub>0.0075</sub> Sb <sub>0.1</sub> Ge <sub>0.8925</sub> Te                                | 473  | 205.70  | 43534.00  | 1.420  | 0.638 |
| AgBi <sub>0.98</sub> Pb <sub>0.02</sub> Se <sub>2.12</sub>                                    | 400  | 453.95  | 1477.00   | 0.570  | 0.214 |
| SnTe <sub>0.1</sub> AgSbSe <sub>2</sub>                                                       | 750  | 140.30  | 84900.00  | 1.881  | 0.669 |
| Ag <sub>3.8</sub> Mo <sub>9</sub> Se <sub>11</sub>                                            | 743  | 171.50  | 20400.00  | 0.784  | 0.569 |
| Rb <sub>7.88</sub> Au <sub>2.47</sub> Ge <sub>43.53</sub>                                     | 250  | -11.14  | 471.00    | 1.879  | 0.000 |
| Se <sub>0.1</sub> Co <sub>4</sub> Sb <sub>11.8</sub> Se <sub>0.2</sub>                        | 600  | -328    | 9600.00   | 2.300  | 0.300 |
| Cu <sub>5</sub> SnSbSe <sub>7</sub>                                                           | 373  | 34.25   | 457391.00 | 5.034  | 0.040 |
| Ca <sub>0.05</sub> BaGd <sub>1.95</sub> NiO <sub>5</sub>                                      | 839  | 230.88  | 82.07     | 1.496  | 0.002 |
| Ca <sub>3</sub> Co <sub>2</sub> O <sub>6</sub>                                                | 973  | 149.00  | 11111.00  | 3.170  | 0.076 |
| Cu <sub>2.1</sub> Cd <sub>0.9</sub> SnSe <sub>4</sub>                                         | 650  | 151.30  | 20100.00  | 0.598  | 0.500 |
| NbCo <sub>0.92</sub> Ni <sub>0.08</sub> Sn                                                    | 904  | -135.00 | 90240.00  | 5.833  | 0.255 |
| (CaZn <sub>0.4</sub> Ag <sub>0.2</sub> Sb) <sub>0.95</sub> (LiZnSb) <sub>0.05</sub>           | 371  | 102.31  | 69519.00  | 1.049  | 0.257 |
| Cu <sub>3.0</sub> SbSe <sub>4</sub>                                                           | 373  | 483.00  | 2367.00   | 1.900  | 0.108 |
| Bi <sub>0.9</sub> Ag <sub>0.1</sub> CuSeO                                                     | 323  | 159.80  | 2600.00   | 0.560  | 0.038 |
| ZnSc <sub>0.02</sub> O <sub>1.03</sub>                                                        | 1073 | -281.00 | 5280.00   | 6.750  | 0.066 |
| (GeTe) <sub>0.8</sub> (AgSnSe <sub>2</sub> ) <sub>0.2</sub>                                   | 423  | 37.27   | 223220.00 | 2.308  | 0.057 |
| Ba <sub>0.97</sub> K <sub>0.03</sub> Zn <sub>2</sub> As <sub>2</sub>                          | 523  | 71.60   | 94118.00  | 2.579  | 0.098 |
| In <sub>0.075</sub> Co <sub>4</sub> Sb <sub>11.975</sub>                                      | 800  | -221    | 34000.00  | 2.900  | 0.400 |

|                                                                                                        |     |         |           |        |       |
|--------------------------------------------------------------------------------------------------------|-----|---------|-----------|--------|-------|
| Ca <sub>10</sub> MnSb <sub>9</sub>                                                                     | 573 | 75.00   | 17.34     | 0.620  | 0.000 |
| Ca <sub>10</sub> InSb <sub>9</sub>                                                                     | 673 | 195.11  | 4016.00   | 0.712  | 0.145 |
| Co <sub>0.99</sub> Ni <sub>0.01</sub> GeTe                                                             | 701 | -107.66 | 61170.00  | 4.664  | 0.107 |
| Sn <sub>0.98</sub> Pb <sub>0.01</sub> Zn <sub>0.01</sub> Se                                            | 573 | 533.00  | 872.00    | 0.768  | 0.185 |
| Cu <sub>11.9</sub> Gd <sub>0.1</sub> Sb <sub>4</sub> S <sub>13</sub>                                   | 525 | 103.21  | 97870.00  | 1.503  | 0.364 |
| Se <sub>0.03</sub> Co <sub>4</sub> Sb <sub>11.94</sub> Se <sub>0.06</sub>                              | 300 | -361    | 10400.00  | 5.200  | 0.100 |
| Na <sub>0.48</sub> Co <sub>4</sub> Sb <sub>12</sub>                                                    | 300 | -111    | 277000.00 | 3.800  | 0.200 |
| Cu <sub>2.5</sub> Sn <sub>0.5</sub> Sb <sub>0.5</sub> Se <sub>3.5</sub>                                | 622 | 56.60   | 275600.00 | 4.060  | 0.140 |
| Ge <sub>9</sub> Sb <sub>2</sub> Te <sub>12</sub>                                                       | 324 | 53.25   | 229091.00 | 2.899  | 0.073 |
| (Cu <sub>0.005</sub> Pb <sub>0.995</sub> Te)(MnTe) <sub>0.03</sub>                                     | 523 | -172.63 | 88082.00  | 1.598  | 0.859 |
| (Sn <sub>0.985</sub> In <sub>0.015</sub> Te) <sub>0.9</sub> (AgCl) <sub>0.1</sub>                      | 323 | 57.37   | 464045.00 | 3.889  | 0.127 |
| NbCoSn <sub>0.9</sub> Sb <sub>0.1</sub>                                                                | 628 | -129.23 | 120993.00 | 5.396  | 0.235 |
| Ag(Bi <sub>0.8</sub> Pb <sub>0.2</sub> ) <sub>0.9</sub> Sb <sub>0.1</sub> Se <sub>2</sub>              | 478 | 219.44  | 681.00    | 0.507  | 0.031 |
| Tl <sub>0.22</sub> Co <sub>4</sub> Sb <sub>12</sub>                                                    | 200 | -92.57  | 134667.00 | 3.564  | 0.065 |
| Pb <sub>0.9825</sub> Tl <sub>0.0075</sub> Na <sub>0.01</sub> Te                                        | 397 | 146.75  | 85267.00  | 2.056  | 0.355 |
| Ca <sub>0.25</sub> BaGd <sub>1.75</sub> NiO <sub>5</sub>                                               | 987 | 151.47  | 394.20    | 1.285  | 0.007 |
| Cu <sub>3</sub> SbSe <sub>4</sub>                                                                      | 573 | 320.00  | 4700.00   | 1.204  | 0.229 |
| Ba <sub>0.03</sub> Co <sub>4</sub> Sb <sub>12</sub>                                                    | 300 | -219.66 | 39900.00  | 5.414  | 0.107 |
| Sn <sub>0.99</sub> Ce <sub>0.01</sub> Te                                                               | 523 | 53.00   | 278500.00 | 4.340  | 0.094 |
| La <sub>0.1</sub> Ca <sub>0.9</sub> TiO <sub>3</sub>                                                   | 840 | -184.00 | 12000.00  | 2.940  | 0.116 |
| Cu <sub>2.7</sub> Ag <sub>0.3</sub> ErTe <sub>3</sub>                                                  | 900 | 145.00  | 31000.00  | 0.610  | 0.962 |
| Ba <sub>8.01</sub> Ga <sub>15.89</sub> Zn <sub>0.006</sub> Sn <sub>30.1</sub>                          | 460 | 391.00  | 11429.00  | 0.871  | 0.922 |
| Cu <sub>5.133</sub> Sn <sub>1.866</sub> S <sub>6.65</sub> Cl <sub>0.35</sub>                           | 300 | 47.73   | 139506.00 | 2.325  | 0.041 |
| Rb <sub>2</sub> Bi <sub>8</sub> Se <sub>12.909</sub>                                                   | 625 | -193.20 | 7955.00   | 0.629  | 0.295 |
| Sr <sub>0.22</sub> Co <sub>4</sub> Sb <sub>12.72</sub>                                                 | 300 | -119    | 179100.00 | 4.100  | 0.200 |
| Cu <sub>2.05</sub> Cd <sub>0.95</sub> SnSe <sub>4</sub>                                                | 400 | 144.80  | 13595.00  | 1.677  | 0.068 |
| Tl <sub>8.95</sub> Bi <sub>1.05</sub> Te <sub>6.0</sub>                                                | 444 | -103.00 | 570.00    | 0.340  | 0.008 |
| Cu <sub>2</sub> ZnSn <sub>0.98</sub> Ag <sub>0.02</sub> Se <sub>4</sub>                                | 323 | 67.61   | 34910.00  | 4.363  | 0.012 |
| Ag <sub>2</sub> Se <sub>1.02</sub>                                                                     | 377 | -132.98 | 148033.00 | 1.182  | 0.835 |
| (Cu <sub>3</sub> SnS <sub>4</sub> ) <sub>0.85</sub> (Ga <sub>2</sub> Te <sub>3</sub> ) <sub>0.15</sub> | 674 | 160.60  | 28782.00  | 1.203  | 0.416 |
| CuFeS <sub>2</sub>                                                                                     | 200 | -375.57 | 5830.00   | 16.140 | 0.010 |
| YbCd <sub>1.3</sub> Zn <sub>0.7</sub> Sb <sub>2</sub>                                                  | 550 | 160.40  | 64200.00  | 1.242  | 0.731 |
| Li <sub>0.02</sub> Cu <sub>1.85</sub> Se                                                               | 706 | 61.30   | 202885.00 | 3.052  | 0.176 |
| Li <sub>0.03</sub> Cu <sub>1.82</sub> Bi <sub>0.03</sub> Se                                            | 606 | 73.08   | 132184.00 | 1.723  | 0.248 |
| Nb <sub>0.9</sub> Ta <sub>0.1</sub> CoSn <sub>0.9</sub> Sb <sub>0.1</sub>                              | 338 | -100.96 | 134326.00 | 5.320  | 0.087 |
| SnSe                                                                                                   | 623 | 384.00  | 469.00    | 0.590  | 0.073 |
| FeNb <sub>0.88</sub> Hf <sub>0.12</sub> Sb                                                             | 800 | 195.63  | 154300.00 | 4.830  | 0.988 |
| Ti <sub>0.97</sub> Mn <sub>0.03</sub> NiSn <sub>0.97</sub> Sb <sub>0.03</sub>                          | 498 | -128.43 | 141722.00 | 5.456  | 0.213 |
| LiCo <sub>0.92</sub> Ni <sub>0.08</sub> O <sub>2</sub>                                                 | 823 | 619.18  | 12.69     | 1.200  | 0.003 |
| GeSe <sub>0.9</sub> Te <sub>0.1</sub>                                                                  | 430 | 104.96  | 2584.00   | 1.534  | 0.008 |
| Pb <sub>0.99</sub> Tl <sub>0.005</sub> Na <sub>0.005</sub> Te                                          | 497 | 212.42  | 44080.00  | 1.511  | 0.654 |

|                                                                                             |     |         |           |        |       |
|---------------------------------------------------------------------------------------------|-----|---------|-----------|--------|-------|
| Ge <sub>0.96</sub> Mn <sub>0.02</sub> Sb <sub>0.02</sub> Te                                 | 598 | 163.64  | 113402.00 | 2.011  | 0.903 |
| V <sub>0.855</sub> Ti <sub>0.1</sub> CoSb                                                   | 972 | -147.50 | 118840.00 | 1.730  | 0.670 |
| CuMo <sub>6</sub> Te <sub>8</sub>                                                           | 500 | 4.20    | 186200.00 | 3.653  | 0.000 |
| Mg <sub>3.5</sub> Gd <sub>0.02</sub> Sb <sub>2</sub>                                        | 300 | -220.00 | 11583.00  | 1.136  | 0.148 |
| Sn <sub>1.03</sub> Se <sub>0.12</sub> Te <sub>0.87</sub> Br <sub>0.01</sub>                 | 723 | 144.14  | 110526.00 | 2.107  | 0.676 |
| Ge <sub>0.95</sub> Mn <sub>0.05</sub> Te                                                    | 298 | 45.16   | 379381.00 | 4.791  | 0.048 |
| Sn <sub>0.98</sub> Pb <sub>0.01</sub> Zn <sub>0.01</sub> Se                                 | 673 | 516.31  | 971.00    | 0.667  | 0.261 |
| Mg <sub>2.994</sub> Na <sub>0.006</sub> Sb <sub>2</sub>                                     | 565 | 190.00  | 15500.00  | 0.980  | 0.323 |
| Ag <sub>0.02</sub> Cr <sub>1.98</sub> Se <sub>3</sub>                                       | 566 | 152.43  | 26750.00  | 1.530  | 0.234 |
| Ge <sub>0.98</sub> Mn <sub>0.02</sub> Te                                                    | 298 | 41.60   | 475258.00 | 5.850  | 0.042 |
| Ba <sub>0.11</sub> Yb <sub>0.08</sub> Co <sub>4</sub> Sb <sub>12</sub>                      | 500 | -144.50 | 154000.00 | 2.390  | 0.673 |
| FeNb <sub>0.9</sub> Zr <sub>0.1</sub> Sb                                                    | 900 | 225.30  | 105500.00 | 7.117  | 0.677 |
| SnTe <sub>0.2</sub> AgSbSe <sub>2</sub>                                                     | 800 | 140.38  | 69799.00  | 1.210  | 0.934 |
| MgAgSb <sub>0.995</sub> In <sub>0.005</sub>                                                 | 450 | 204.90  | 41050.00  | 1.016  | 0.800 |
| ZrNiPb <sub>0.96</sub> Sn <sub>0.2</sub> Bi <sub>0.02</sub>                                 | 673 | -141.20 | 258298.00 | 5.950  | 0.582 |
| La <sub>0.7</sub> Co <sub>4</sub> Sb <sub>12</sub>                                          | 373 | -177.66 | 33300.00  | 3.157  | 0.124 |
| Ba <sub>8.01</sub> Ga <sub>15.83</sub> Zn <sub>0.019</sub> Sn <sub>30.15</sub>              | 340 | 430.90  | 4929.00   | 0.826  | 0.377 |
| (Sn <sub>0.8</sub> Ge <sub>0.2</sub> ) <sub>0.97</sub> Mn <sub>0.03</sub> Te                | 673 | 99.40   | 163610.00 | 2.679  | 0.406 |
| Hf <sub>0.7</sub> Ti <sub>0.3</sub> CoSb <sub>0.8</sub> Sn <sub>0.2</sub>                   | 779 | 221.70  | 46800.00  | 2.850  | 0.630 |
| YbSi <sub>2</sub>                                                                           | 426 | -43.60  | 671200.00 | 9.500  | 0.057 |
| (Sn <sub>0.8</sub> Ge <sub>0.2</sub> ) <sub>0.97</sub> Mn <sub>0.03</sub> Te                | 873 | 141.24  | 102300.00 | 2.039  | 0.874 |
| Ag <sub>0.98</sub> Nb <sub>0.02</sub> BiSe <sub>2.0</sub>                                   | 675 | -242.40 | 6430.00   | 0.480  | 0.531 |
| Cu <sub>2.1</sub> Cd <sub>0.9</sub> SnSe <sub>4</sub>                                       | 700 | 156.70  | 18960.00  | 0.500  | 0.652 |
| ZnSc <sub>0.02</sub> O <sub>1.03</sub>                                                      | 573 | -214.70 | 4428.00   | 19.583 | 0.006 |
| Sn <sub>0.985</sub> In <sub>0.015</sub> Te                                                  | 723 | 106.70  | 189326.00 | 3.678  | 0.424 |
| Ca <sub>1.11</sub> Yb <sub>3.89</sub> Al <sub>2</sub> Sb <sub>5.77</sub> Ge <sub>0.23</sub> | 304 | 33.02   | 21308.00  | 2.341  | 0.003 |
| Ag <sub>2.0</sub> Se <sub>0.6</sub> Te <sub>0.4</sub>                                       | 345 | -111.00 | 78990.00  | 0.720  | 0.466 |
| Ti <sub>0.82</sub> PtSb                                                                     | 301 | -78.10  | 133900.00 | 2.530  | 0.080 |
| Cu <sub>2.2</sub> Se                                                                        | 572 | 141.70  | 55410.00  | 1.110  | 0.573 |
| Bi <sub>1.94</sub> Nb <sub>0.06</sub> Te <sub>3</sub>                                       | 572 | -100.67 | 37597.00  | 0.852  | 0.256 |
| GeSe <sub>0.85</sub> Te <sub>0.15</sub>                                                     | 430 | 22.15   | 73881.00  | 1.893  | 0.008 |
| Cd <sub>2</sub> Cu <sub>3</sub> In <sub>3</sub> Te <sub>8</sub>                             | 427 | 171.00  | 15000.00  | 1.476  | 0.127 |
| Li <sub>1.04</sub> Co <sub>0.85</sub> Ni <sub>0.15</sub> O <sub>2</sub>                     | 623 | 308.00  | 9.11      | 1.688  | 0.000 |
| Eu(Zn <sub>0.7</sub> Cd <sub>0.3</sub> ) <sub>2</sub> Sb <sub>2</sub>                       | 500 | 198.46  | 40100.00  | 1.306  | 0.605 |
| Ag <sub>8</sub> Sn <sub>0.7</sub> Ga <sub>0.3</sub> Se <sub>6</sub>                         | 474 | -421.90 | 430.00    | 0.255  | 0.142 |
| Ba <sub>8</sub> Cu <sub>5</sub> Si <sub>25</sub> Ge <sub>16</sub>                           | 711 | -108.00 | 72800.00  | 1.914  | 0.313 |
| (SnTe) <sub>40</sub> Sb <sub>2</sub> Te <sub>3</sub>                                        | 673 | 110.43  | 143567.00 | 3.158  | 0.373 |
| BiSbSe <sub>2.82</sub> Cl <sub>0.18</sub>                                                   | 400 | -152.00 | 14800.00  | 0.580  | 0.236 |
| Co <sub>0.95</sub> Ni <sub>0.05</sub> GeTe                                                  | 825 | -96.17  | 121693.00 | 5.229  | 0.178 |
| As <sub>2</sub> Te <sub>2.8</sub> Se <sub>0.2</sub>                                         | 423 | 221.21  | 1671.90   | 0.571  | 0.061 |
| Cu <sub>2.2</sub> Se                                                                        | 870 | 215.35  | 29730.00  | 0.962  | 1.260 |

|                                                                                 |      |         |           |        |       |
|---------------------------------------------------------------------------------|------|---------|-----------|--------|-------|
| Cu <sub>26</sub> V <sub>2</sub> Ge <sub>4</sub> Sb <sub>2</sub> S <sub>32</sub> | 400  | 84.00   | 140800.00 | 2.263  | 0.176 |
| BaDyCo <sub>4</sub> O <sub>7</sub>                                              | 368  | 142.90  | 77.00     | 0.613  | 0.001 |
| Cu <sub>2.1</sub> Cd <sub>0.9</sub> SnSe <sub>4</sub>                           | 300  | 129.50  | 20517.00  | 2.050  | 0.050 |
| K <sub>8</sub> Ga <sub>8</sub> Ge <sub>38</sub>                                 | 150  | 1.06    | 136.89    | 1.173  | 0.000 |
| (PbTe)(MnTe) <sub>0.03</sub>                                                    | 323  | -165.09 | 103699.00 | 2.085  | 0.438 |
| SnAgSbSe <sub>2</sub>                                                           | 600  | 60.00   | 285000.00 | 5.145  | 0.120 |
| Ca <sub>14</sub> MgSb <sub>11</sub>                                             | 1000 | 171.80  | 6688.00   | 0.720  | 0.274 |
| Mg <sub>3.5</sub> Ho <sub>0.01</sub> Sb <sub>1.97</sub> Te <sub>0.03</sub>      | 300  | -214.10 | 19512.00  | 1.143  | 0.235 |
| BiSb(Se <sub>0.94</sub> Br <sub>0.06</sub> ) <sub>3</sub>                       | 800  | -219.00 | 15479.00  | 0.440  | 1.350 |
| Zn <sub>0.95</sub> Cd <sub>0.05</sub> Sc <sub>0.02</sub> O <sub>1.03</sub>      | 573  | -100.00 | 16800.00  | 6.750  | 0.014 |
| Mg <sub>2.994</sub> Na <sub>0.006</sub> Sb <sub>2</sub>                         | 370  | 139.00  | 16444.00  | 1.379  | 0.085 |
| Li <sub>1.1</sub> Co <sub>0.85</sub> Ni <sub>0.15</sub> O <sub>2</sub>          | 823  | 304.50  | 223.35    | 1.911  | 0.009 |
| ZrNiSn <sub>0.98</sub> Bi <sub>0.02</sub>                                       | 303  | -136.00 | 42687.00  | 9.720  | 0.025 |
| Cu <sub>22</sub> Sn <sub>9</sub> SbS <sub>32</sub>                              | 700  | 147.60  | 52326.00  | 1.473  | 0.542 |
| Rb <sub>2</sub> Bi <sub>8</sub> Se <sub>12.909</sub>                            | 428  | -166.00 | 10795.00  | 0.714  | 0.178 |
| CuAgTe <sub>0.6</sub> Se <sub>0.4</sub>                                         | 330  | 209.51  | 9916.00   | 0.433  | 0.332 |
| Sn <sub>0.97</sub> Pb <sub>0.02</sub> Zn <sub>0.01</sub> Se                     | 773  | 411.97  | 4000.00   | 0.565  | 0.928 |
| Ti <sub>0.95</sub> Mn <sub>0.05</sub> NiSn <sub>0.95</sub> Sb <sub>0.05</sub>   | 697  | -154.20 | 179500.00 | 5.644  | 0.527 |
| SnS <sub>0.97</sub> Se <sub>0.03</sub>                                          | 300  | 215.00  | 73400.00  | 2.920  | 0.349 |
| Cu <sub>0.9</sub> Pd <sub>0.1</sub> FeS <sub>2</sub>                            | 30   | -30.53  | 57255.00  | 13.400 | 0.000 |
| Ba <sub>8.04</sub> Cu <sub>4.99</sub> Si <sub>18</sub> Ge <sub>22.98</sub>      | 466  | -162.65 | 27400.00  | 1.307  | 0.258 |
| AgBi <sub>0.9</sub> Sb <sub>0.1</sub> Se <sub>2</sub>                           | 575  | 75.52   | 174.60    | 0.331  | 0.002 |
| CoS <sub>2</sub>                                                                | 300  | -40.20  | 667884.00 | 11.200 | 0.029 |
| CoS <sub>2</sub>                                                                | 41   | -28.80  | 5214000   | 10.800 | 0.016 |
| Mo <sub>3</sub> Sb <sub>7</sub> l <sub>0.75</sub>                               | 823  | 49.13   | 421810.00 | 6.560  | 0.128 |
| Ag <sub>0.01</sub> Sn <sub>0.99</sub> Se <sub>0.8</sub> S <sub>0.2</sub>        | 322  | 313.68  | 1031.00   | 0.199  | 0.164 |
| Ti <sub>0.99</sub> Mn <sub>0.01</sub> NiSn <sub>0.99</sub> Sb <sub>0.01</sub>   | 297  | -127.14 | 88742.00  | 6.235  | 0.068 |
| Cu <sub>1.875</sub> Ag <sub>0.125</sub> SnSe <sub>3</sub>                       | 500  | 229.29  | 2510.00   | 0.635  | 0.104 |
| Cu <sub>2</sub> ZnSn <sub>0.925</sub> Ag <sub>0.075</sub> Se <sub>4</sub>       | 573  | 88.17   | 56985.00  | 2.331  | 0.109 |
| CuGa <sub>0.99</sub> Mn <sub>0.01</sub> Te <sub>2</sub>                         | 325  | 332.00  | 6053.00   | 5.383  | 0.040 |
| Ca <sub>14</sub> MgSb <sub>11</sub>                                             | 1083 | 182.00  | 6700.00   | 0.740  | 0.322 |
| AgMo <sub>6</sub> Te <sub>8</sub>                                               | 800  | 34.00   | 168200.00 | 4.513  | 0.034 |
| Rb <sub>2</sub> Bi <sub>8</sub> Se <sub>12.9805</sub>                           | 330  | -223.20 | 8106.00   | 0.740  | 0.180 |
| BaZn <sub>2</sub> As <sub>2</sub>                                               | 523  | 250.00  | 4557.00   | 1.255  | 0.119 |
| AgBi <sub>0.85</sub> Sb <sub>0.15</sub> Se <sub>2</sub>                         | 550  | 354.17  | 127.50    | 0.372  | 0.024 |
| Sr <sub>15</sub> Ga <sub>29.5</sub> Ge <sub>55.6</sub>                          | 375  | -167.00 | 35082.00  | 1.022  | 0.363 |
| Cu <sub>7</sub> P(S <sub>0.5</sub> Se <sub>0.5</sub> ) <sub>6</sub>             | 325  | 256.21  | 1000.00   | 0.253  | 0.084 |
| Zn <sub>0.9</sub> Cd <sub>0.1</sub> Sc <sub>0.04</sub> O <sub>1.06</sub>        | 1173 | -166.40 | 21145.00  | 2.700  | 0.254 |
| Eu <sub>0.27</sub> Co <sub>4</sub> Sb <sub>12</sub>                             | 850  | -163    | 141400.00 | 1.200  | 0.900 |
| Bi <sub>2</sub> Te <sub>3</sub>                                                 | 478  | -127.73 | 22792.00  | 0.909  | 0.196 |
| Sr <sub>14</sub> MgBi <sub>11</sub>                                             | 326  | 32.50   | 63203.00  | 1.253  | 0.017 |



|                                                                                              |     |         |           |        |       |
|----------------------------------------------------------------------------------------------|-----|---------|-----------|--------|-------|
| Sn <sub>0.96</sub> Pb <sub>0.01</sub> Cd <sub>0.035</sub> Se                                 | 423 | 342.05  | 3889.00   | 0.574  | 0.335 |
| Co <sub>4</sub> Sb <sub>11.95</sub> Te <sub>0.05</sub>                                       | 300 | -194    | 45100.00  | 7.300  | 0.100 |
| Cu <sub>2.82</sub> Ag <sub>0.18</sub> SbSe <sub>4</sub>                                      | 473 | 411.00  | 5782.00   | 0.930  | 0.497 |
| Cu <sub>7</sub> PSe <sub>6</sub>                                                             | 523 | 204.76  | 4078.70   | 0.300  | 0.298 |
| La <sub>0.5</sub> Co <sub>4</sub> Sb <sub>12</sub>                                           | 773 | 92.00   | 26820.00  | 3.420  | 0.051 |
| Sr <sub>0.22</sub> Co <sub>4</sub> Sb <sub>12.72</sub>                                       | 850 | -179    | 99000.00  | 1.700  | 0.800 |
| Cu <sub>2.94</sub> Ag <sub>0.06</sub> SbSe <sub>4</sub>                                      | 523 | 403.00  | 5134.00   | 1.100  | 0.390 |
| Ba <sub>8</sub> Cu <sub>5</sub> Si <sub>25</sub> Ge <sub>16</sub>                            | 514 | -83.10  | 94600.00  | 1.885  | 0.178 |
| Ag <sub>2</sub> Se <sub>1.01</sub>                                                           | 312 | -142.00 | 118525.00 | 1.020  | 0.731 |
| BiSb(S <sub>0.98</sub> Br <sub>0.02</sub> ) <sub>3</sub>                                     | 300 | -109.00 | 21915.00  | 0.680  | 0.120 |
| Sn <sub>0.975</sub> Pb <sub>0.01</sub> Cd <sub>0.015</sub> Se                                | 723 | 400.20  | 2127.00   | 0.519  | 0.474 |
| Ge <sub>0.87</sub> Mn <sub>0.05</sub> Sb <sub>0.08</sub> Te                                  | 598 | 192.90  | 82474.00  | 1.617  | 1.135 |
| Ca <sub>3</sub> Al <sub>0.95</sub> Zn <sub>0.05</sub> Sb <sub>3</sub>                        | 622 | 236.70  | 4900.00   | 0.810  | 0.211 |
| Nb <sub>0.95</sub> Ta <sub>0.05</sub> CoSn <sub>0.9</sub> Sb <sub>0.1</sub>                  | 430 | -102.89 | 135035.00 | 5.245  | 0.117 |
| La <sub>0.1</sub> Co <sub>4</sub> Sb <sub>12</sub>                                           | 673 | 113.80  | 26120.00  | 3.814  | 0.060 |
| CoS <sub>2</sub>                                                                             | 107 | -27.40  | 1190412   | 14.120 | 0.007 |
| Ta <sub>0.88</sub> Ti <sub>0.12</sub> FeSb                                                   | 370 | 125.40  | 325500.00 | 5.450  | 0.348 |
| Sn <sub>1.03</sub> Te                                                                        | 423 | 27.07   | 434211.00 | 7.855  | 0.017 |
| (SnTe) <sub>0.94</sub> (CuSbTe <sub>2</sub> ) <sub>0.06</sub>                                | 427 | 44.20   | 297300.00 | 4.236  | 0.059 |
| MgAgSb <sub>0.99</sub> In <sub>0.01</sub>                                                    | 400 | 187.82  | 53273.00  | 0.951  | 0.791 |
| CuAgTe <sub>0.5</sub> Se <sub>0.5</sub>                                                      | 443 | 203.80  | 4807.00   | 0.325  | 0.272 |
| Zn <sub>0.9</sub> Cd <sub>0.1</sub> Sc <sub>0.02</sub> O <sub>1.03</sub>                     | 873 | -130.00 | 35700.00  | 3.583  | 0.147 |
| Y <sub>0.2</sub> Bi <sub>1.8</sub> Te <sub>3</sub>                                           | 398 | -143.30 | 78100.00  | 0.596  | 1.071 |
| Sn <sub>1.03</sub> Te                                                                        | 623 | 85.90   | 173900.00 | 4.950  | 0.162 |
| Gd <sub>2</sub> Se <sub>2.98</sub>                                                           | 450 | -147.46 | 34430.00  | 1.710  | 0.197 |
| Mo <sub>3</sub> Sb <sub>7</sub> l <sub>0.75</sub>                                            | 623 | 38.54   | 477200.00 | 6.290  | 0.070 |
| Cu <sub>1.8</sub> Se                                                                         | 672 | 60.89   | 258110.00 | 4.025  | 0.160 |
| SnS                                                                                          | 723 | 413.00  | 6500.00   | 1.032  | 0.788 |
| Ag <sub>0.03</sub> Cu <sub>1.945</sub> S <sub>0.5</sub> Se <sub>0.5</sub>                    | 300 | 144.59  | 3235.00   | 0.313  | 0.065 |
| Co <sub>0.95</sub> Ni <sub>0.05</sub> GeTe                                                   | 626 | -87.87  | 125397.00 | 4.908  | 0.123 |
| Bi <sub>2</sub> Te <sub>3</sub>                                                              | 498 | -158.16 | 72257.00  | 0.939  | 0.959 |
| Mg <sub>2.16</sub> (Si <sub>0.4</sub> Sn <sub>0.6</sub> ) <sub>0.98</sub> Bi <sub>0.02</sub> | 500 | -168.10 | 129500.00 | 2.365  | 0.774 |
| Mg <sub>2</sub> Zn <sub>0.98</sub> Sb <sub>2</sub>                                           | 373 | 296.71  | 4570.00   | 0.674  | 0.223 |
| Ge <sub>0.95</sub> Mn <sub>0.05</sub> Te                                                     | 773 | 159.00  | 131900.00 | 2.481  | 1.039 |
| Ag <sub>0.01</sub> Sn <sub>0.99</sub> Se <sub>0.65</sub> S <sub>0.35</sub>                   | 763 | 392.00  | 877.00    | 0.205  | 0.502 |
| Zn <sub>0.97</sub> Al <sub>0.03</sub> O                                                      | 473 | -78.00  | 45000.00  | 6.700  | 0.019 |
| Sn <sub>0.91</sub> Mn <sub>0.09</sub> Te <sub>0.98</sub> l <sub>0.02</sub>                   | 867 | 211.86  | 46154.00  | 1.473  | 1.219 |
| Ag <sub>2</sub> Se                                                                           | 524 | -100.00 | 118621.00 | 3.100  | 0.190 |
| CuAgTe <sub>0.6</sub> Se <sub>0.4</sub>                                                      | 349 | 216.30  | 9186.00   | 0.413  | 0.363 |
| Ag <sub>0.01</sub> Sn <sub>0.99</sub> Se                                                     | 518 | 380.77  | 698.00    | 0.286  | 0.183 |
| CsPr <sub>2</sub> Ag <sub>3</sub> Te <sub>5</sub>                                            | 385 | 43.52   | 69.12     | 0.655  | 0.000 |

|                                                                                                                 |      |         |           |       |       |
|-----------------------------------------------------------------------------------------------------------------|------|---------|-----------|-------|-------|
| FeNb <sub>0.88</sub> Hf <sub>0.12</sub> Sb                                                                      | 300  | 93.72   | 590700.00 | 8.320 | 0.188 |
| Bi <sub>2</sub> Te <sub>3</sub>                                                                                 | 505  | -113.00 | 20649.00  | 0.924 | 0.144 |
| Ba <sub>8</sub> Cu <sub>5.04</sub> Si <sub>13.01</sub> Ge <sub>27.96</sub>                                      | 713  | -120.40 | 53800.00  | 1.810 | 0.309 |
| In <sub>4</sub> Pb <sub>0.01</sub> Sn <sub>0.03</sub> Se <sub>2.9</sub> Cl <sub>0.06</sub>                      | 323  | -199.20 | 3050.00   | 0.944 | 0.038 |
| Ag <sub>0.01</sub> Cr <sub>1.99</sub> Se <sub>3</sub>                                                           | 566  | 152.40  | 26500.00  | 1.614 | 0.216 |
| Ge <sub>0.87</sub> In <sub>0.05</sub> Pb <sub>0.08</sub> Te                                                     | 425  | 207.39  | 43511.00  | 1.100 | 0.723 |
| Pb <sub>0.9825</sub> Tl <sub>0.0075</sub> Na <sub>0.01</sub> Te                                                 | 497  | 195.10  | 60854.00  | 1.614 | 0.713 |
| In <sub>0.005</sub> Pb <sub>0.995</sub> Te <sub>0.999</sub> I <sub>0.001</sub>                                  | 663  | -255.00 | 11770.00  | 1.373 | 0.366 |
| Bi <sub>0.42</sub> Sb <sub>1.58</sub> Te <sub>3</sub>                                                           | 323  | 224.50  | 51064.00  | 0.934 | 0.890 |
| SnTe                                                                                                            | 616  | 63.28   | 269822.00 | 4.434 | 0.150 |
| Ag <sub>0.02</sub> Cu <sub>1.955</sub> S <sub>0.5</sub> Se <sub>0.5</sub>                                       | 673  | 180.98  | 27574.00  | 0.828 | 0.914 |
| Bi <sub>2.0</sub> S <sub>2.85</sub> Se <sub>0.15</sub>                                                          | 623  | -516.00 | 403.00    | 0.530 | 0.126 |
| (Cu <sub>3</sub> Sn <sub>4</sub> ) <sub>0.85</sub> (Ga <sub>2</sub> Te <sub>3</sub> ) <sub>0.15</sub>           | 624  | 149.75  | 31853.00  | 1.236 | 0.361 |
| Bi <sub>0.8</sub> Ba <sub>0.2</sub> CuSeO                                                                       | 522  | 189.50  | 13510.00  | 0.743 | 0.457 |
| La <sub>0.25</sub> Ca <sub>0.75</sub> TiO <sub>3</sub>                                                          | 538  | -86.00  | 97300.00  | 3.300 | 0.117 |
| In <sub>3.95</sub> Pb <sub>0.05</sub> Se <sub>3</sub>                                                           | 480  | -242.00 | 11200.00  | 0.860 | 0.366 |
| Rb <sub>2</sub> Bi <sub>8</sub> Se <sub>12.9935</sub>                                                           | 724  | -262.40 | 5420.00   | 0.530 | 0.510 |
| Ca <sub>5</sub> In <sub>1.98</sub> Zn <sub>0.02</sub> Sb <sub>6</sub>                                           | 722  | 290.00  | 4612.00   | 0.666 | 0.405 |
| Cu <sub>3</sub> Sb <sub>0.998</sub> In <sub>0.002</sub> Se <sub>4</sub>                                         | 523  | 317.48  | 5952.00   | 1.250 | 0.251 |
| LiCoO <sub>2</sub>                                                                                              | 1023 | 653.79  | 57.36     | 2.716 | 0.009 |
| Sb <sub>0.15</sub> Ge <sub>0.85</sub> Te                                                                        | 773  | 265.19  | 42110.00  | 1.473 | 1.554 |
| SnS <sub>0.88</sub> Se <sub>0.12</sub>                                                                          | 872  | 378.00  | 6200.00   | 1.000 | 0.720 |
| TmCuTe <sub>2</sub>                                                                                             | 503  | 110.00  | 57326.00  | 1.183 | 0.295 |
| Cu <sub>3</sub> Sb <sub>0.996</sub> In <sub>0.004</sub> Se <sub>4</sub>                                         | 323  | 230.00  | 5800.00   | 2.522 | 0.039 |
| Cu <sub>2</sub> Zn <sub>0.2</sub> Fe <sub>0.8</sub> SnSe <sub>4</sub>                                           | 373  | 232.95  | 2645.00   | 1.740 | 0.031 |
| Li <sub>0.03</sub> Cu <sub>1.83</sub> Bi <sub>0.02</sub> Se                                                     | 303  | 52.50   | 89655.00  | 1.063 | 0.070 |
| (Cu <sub>0.001</sub> Pb <sub>0.999</sub> Te)(MnTe) <sub>0.03</sub>                                              | 723  | -237.19 | 31507.00  | 1.149 | 1.115 |
| BiSbSe <sub>2.82</sub> Cl <sub>0.18</sub>                                                                       | 500  | -182.00 | 11770.00  | 0.550 | 0.354 |
| Ag <sub>0.01</sub> Cr <sub>1.99</sub> Se <sub>3</sub>                                                           | 671  | 162.00  | 23290.00  | 1.680 | 0.244 |
| Cu <sub>7</sub> PS <sub>6</sub>                                                                                 | 623  | 270.24  | 370.00    | 0.195 | 0.086 |
| La <sub>0.7</sub> Co <sub>4</sub> Sb <sub>12</sub>                                                              | 573  | -201.00 | 35088.00  | 4.460 | 0.182 |
| Yb <sub>14</sub> MgSb <sub>11</sub>                                                                             | 500  | 106.40  | 23650.00  | 0.825 | 0.162 |
| Ca <sub>10</sub> ZnSb <sub>9</sub>                                                                              | 373  | 19.40   | 37.35     | 0.643 | 0.000 |
| CoGeTe                                                                                                          | 551  | -140.00 | 7181.00   | 5.970 | 0.013 |
| In <sub>0.01</sub> Pb <sub>0.99</sub> Te <sub>0.994</sub> I <sub>0.006</sub>                                    | 585  | -200.00 | 34600.00  | 1.420 | 0.563 |
| Mg <sub>2.16</sub> (Si <sub>0.4</sub> Sn <sub>0.6</sub> ) <sub>0.97</sub> Bi <sub>0.03</sub>                    | 700  | -198.60 | 105555.00 | 2.279 | 1.279 |
| GeTe                                                                                                            | 550  | 75.40   | 280488.00 | 4.000 | 0.219 |
| (Ag <sub>0.1</sub> Sb <sub>0.1</sub> Sn <sub>0.8</sub> )(S <sub>0.1</sub> Se <sub>0.1</sub> Te <sub>0.8</sub> ) | 825  | 148.50  | 79907.00  | 1.500 | 0.969 |
| Cu <sub>2</sub> Se <sub>0.7</sub> S <sub>0.3</sub>                                                              | 707  | 131.68  | 48571.00  | 0.781 | 0.762 |
| As <sub>2</sub> Te <sub>2.8</sub> Se <sub>0.2</sub>                                                             | 298  | 181.19  | 649.40    | 0.657 | 0.010 |
| K <sub>0.09</sub> Co <sub>4</sub> Sb <sub>12</sub>                                                              | 800  | -193    | 41000.00  | 3.800 | 0.300 |

|                                                                                               |      |         |           |       |       |
|-----------------------------------------------------------------------------------------------|------|---------|-----------|-------|-------|
| Ag <sub>0.9</sub> Sb <sub>0.9</sub> Pb <sub>18.3</sub> Te <sub>19.9</sub>                     | 373  | -372.80 | 1872.00   | 1.038 | 0.093 |
| CsPr <sub>2</sub> Ag <sub>3</sub> Te <sub>5</sub>                                             | 462  | 133.94  | 98.53     | 0.616 | 0.001 |
| La <sub>0.2</sub> Ca <sub>0.8</sub> TiO <sub>3</sub>                                          | 1016 | -200.00 | 26000.00  | 2.610 | 0.405 |
| Cd <sub>2</sub> Cu <sub>3</sub> In <sub>3</sub> Te <sub>8</sub>                               | 675  | 216.20  | 8200.00   | 0.714 | 0.362 |
| Ca <sub>3</sub> Co <sub>3.9</sub> Ti <sub>0.1</sub> O <sub>9</sub>                            | 300  | 131.00  | 5623.00   | 2.590 | 0.011 |
| NbCo <sub>0.9</sub> Ni <sub>0.1</sub> Sn                                                      | 492  | -151.76 | 90952.00  | 8.095 | 0.127 |
| Al <sub>0.02</sub> Ge <sub>0.98</sub> Te                                                      | 823  | 142.50  | 178571.00 | 3.182 | 0.928 |
| Ag <sub>0.8</sub> Sb <sub>0.8</sub> Pb <sub>18.3</sub> Te <sub>20.0</sub>                     | 373  | -336.00 | 4080.00   | 0.917 | 0.187 |
| Nd <sub>2.86</sub> Te <sub>4</sub>                                                            | 773  | -97.17  | 86170.00  | 1.900 | 0.311 |
| Ca <sub>9</sub> Yb <sub>2</sub> Sb <sub>10</sub>                                              | 608  | 15.30   | 50612.00  | 0.953 | 0.008 |
| Mg <sub>2</sub> Cu <sub>3</sub> In <sub>3</sub> Te <sub>8</sub>                               | 572  | 290.70  | 4862.00   | 1.730 | 0.136 |
| Hf <sub>0.9</sub> Ti <sub>0.1</sub> CoSb <sub>0.8</sub> Sn <sub>0.2</sub>                     | 989  | 218.00  | 54752.00  | 3.292 | 0.781 |
| LaCo <sub>0.5</sub> (Ni <sub>0.5</sub> Fe <sub>0.5</sub> ) <sub>0.5</sub> O <sub>3</sub>      | 300  | 109.00  | 1060.00   | 0.070 | 0.052 |
| Ag <sub>0.5</sub> Sb <sub>1.1</sub> Pb <sub>19.6</sub> Te <sub>18.8</sub>                     | 423  | 1.60    | 29875.00  | 1.633 | 0.000 |
| GeSe <sub>0.95</sub> Te <sub>0.05</sub>                                                       | 681  | 551.75  | 239.21    | 0.762 | 0.065 |
| SnS                                                                                           | 573  | 305.20  | 19318.00  | 1.466 | 0.694 |
| Ag <sub>0.97</sub> CrSe <sub>2</sub>                                                          | 703  | 144.07  | 11217.00  | 0.395 | 0.414 |
| Pb <sub>0.99</sub> Na <sub>0.01</sub> Te                                                      | 798  | 279.41  | 24450.00  | 0.899 | 1.695 |
| Sn <sub>0.91</sub> Mn <sub>0.09</sub> Te                                                      | 720  | 139.84  | 106509.00 | 2.579 | 0.581 |
| As <sub>2</sub> Te <sub>2.3</sub> Se <sub>0.7</sub>                                           | 373  | 347.96  | 160.46    | 0.487 | 0.015 |
| Pb <sub>0.975</sub> Zn <sub>0.04</sub> Te                                                     | 622  | -251.30 | 30600.00  | 1.278 | 0.941 |
| Bi <sub>0.94</sub> Ag <sub>0.06</sub> CuSeO                                                   | 473  | 260.30  | 1470.00   | 0.497 | 0.095 |
| TiNiSn                                                                                        | 598  | -177.08 | 79470.00  | 5.087 | 0.293 |
| Mo <sub>3</sub> Sb <sub>7</sub> I <sub>1.5</sub>                                              | 323  | 6.60    | 497000.00 | 4.310 | 0.002 |
| Ag <sub>2</sub> Se <sub>0.98</sub>                                                            | 376  | -92.50  | 293100.00 | 1.626 | 0.580 |
| Cu <sub>10.5</sub> Ni <sub>0.5</sub> ZnSb <sub>4</sub> S <sub>13</sub>                        | 323  | 168.20  | 6860.00   | 0.398 | 0.158 |
| BaLuCo <sub>4</sub> O <sub>7</sub>                                                            | 368  | 128.00  | 99.00     | 0.590 | 0.001 |
| Mg <sub>2.16</sub> (Si <sub>0.4</sub> Sn <sub>0.6</sub> ) <sub>0.97</sub> Bi <sub>0.03</sub>  | 600  | -180.40 | 124603.00 | 2.298 | 1.059 |
| Se <sub>0.05</sub> Co <sub>4</sub> Sb <sub>11.9</sub> Se <sub>0.1</sub>                       | 600  | -354    | 12100.00  | 2.800 | 0.300 |
| Ba <sub>8.04</sub> Cu <sub>4.9</sub> Si <sub>3.23</sub> Ge <sub>37.83</sub>                   | 712  | -137.00 | 50825.00  | 1.514 | 0.449 |
| GeSe <sub>0.95</sub> Te <sub>0.05</sub>                                                       | 633  | 567.22  | 134.52    | 0.859 | 0.032 |
| ZrNiPb <sub>0.99</sub> Bi <sub>0.01</sub>                                                     | 475  | -160.30 | 171240.00 | 7.736 | 0.270 |
| Ge <sub>0.55</sub> Sb <sub>0.25</sub> Te <sub>0.8</sub> (AgSnSe <sub>2</sub> ) <sub>0.2</sub> | 623  | 209.94  | 25806.00  | 0.740 | 1.090 |
| Cu <sub>5</sub> Sn <sub>2</sub> Se <sub>7</sub>                                               | 400  | 26.34   | 500000.00 | 4.774 | 0.029 |
| FeNb <sub>0.92</sub> Ti <sub>0.08</sub> Sb                                                    | 700  | 207.00  | 110000.00 | 7.400 | 0.446 |
| (SnTe) <sub>0.86</sub> (CuSbTe <sub>2</sub> ) <sub>0.14</sub>                                 | 723  | 145.50  | 95550.00  | 2.112 | 0.692 |
| Cu <sub>1.55</sub> S                                                                          | 550  | 26.03   | 415385.00 | 4.791 | 0.032 |
| Sn <sub>0.97</sub> Ce <sub>0.03</sub> Te                                                      | 623  | 150.00  | 73420.00  | 2.245 | 0.480 |
| In <sub>0.01</sub> Pb <sub>0.99</sub> Te <sub>0.998</sub> l <sub>0.002</sub>                  | 428  | -238.70 | 23350.00  | 1.610 | 0.354 |
| Ba <sub>8.01</sub> Ga <sub>15.89</sub> Zn <sub>0.006</sub> Sn <sub>30.1</sub>                 | 500  | 398.90  | 11050.00  | 0.908 | 0.968 |
| Gd <sub>2.75</sub> Se <sub>4</sub>                                                            | 550  | -147.00 | 7230.00   | 0.811 | 0.106 |

|                                                                                                       |       |         |           |       |       |
|-------------------------------------------------------------------------------------------------------|-------|---------|-----------|-------|-------|
| Ca <sub>10</sub> InSb <sub>9</sub>                                                                    | 573   | 178.57  | 3577.00   | 0.720 | 0.091 |
| Cu <sub>2</sub> ZnSnSe <sub>4</sub>                                                                   | 473   | 144.80  | 16500.00  | 3.760 | 0.044 |
| YbCd <sub>1.5</sub> Zn <sub>0.5</sub> Sb <sub>2</sub>                                                 | 350   | 121.03  | 91450.00  | 1.613 | 0.330 |
| BiCuSeO                                                                                               | 420   | 421.15  | 874.00    | 0.690 | 0.094 |
| Ag <sub>0.01</sub> Sn <sub>0.99</sub> Se <sub>0.9</sub> S <sub>0.1</sub>                              | 567   | 415.80  | 569.00    | 0.192 | 0.291 |
| S <sub>0.18</sub> Co <sub>3.4</sub> Ni <sub>0.58</sub> Sb <sub>11.94</sub>                            | 300   | -90     | 108000.00 | 2.200 | 0.100 |
| Cu <sub>12</sub> Sb <sub>4</sub> S <sub>13</sub>                                                      | 720   | 219.52  | 8570.00   | 0.448 | 0.664 |
| Tl <sub>9.0</sub> Sb <sub>0.97</sub> Te <sub>6</sub>                                                  | 507   | 173.00  | 26330.00  | 0.550 | 0.726 |
| NbCoSn <sub>0.9</sub> Sb <sub>0.1</sub>                                                               | 924   | -160.00 | 90780.00  | 4.526 | 0.474 |
| Zn <sub>0.96</sub> Al <sub>0.04</sub> O                                                               | 573   | -81.00  | 50500.00  | 3.700 | 0.051 |
| Ag <sub>0.01</sub> Sn <sub>0.99</sub> Se <sub>0.85</sub> S <sub>0.15</sub>                            | 518   | 395.30  | 571.00    | 0.162 | 0.286 |
| Mg <sub>3.5</sub> Gd <sub>0.01</sub> Sb <sub>2</sub>                                                  | 500   | -285.92 | 6711.00   | 0.881 | 0.311 |
| Bi <sub>0.985</sub> Na <sub>0.015</sub> CuSeO                                                         | 923   | 318.00  | 4700.00   | 0.500 | 0.910 |
| (Cu <sub>3</sub> Sn <sub>4</sub> ) <sub>0.85</sub> (Ga <sub>2</sub> Te <sub>3</sub> ) <sub>0.15</sub> | 741   | 183.33  | 19467.00  | 1.039 | 0.467 |
| Ba <sub>0.11</sub> Yb <sub>0.03</sub> Co <sub>4</sub> Sb <sub>12.07</sub>                             | 300   | -115    | 178700.00 | 1.900 | 0.200 |
| Bi <sub>0.98</sub> Pb <sub>0.02</sub> CuSeO                                                           | 250   | 203.61  | 22230.00  | 1.720 | 0.134 |
| Ge <sub>0.9</sub> Mn <sub>0.05</sub> Sb <sub>0.05</sub> Te                                            | 648   | 189.00  | 86700.00  | 1.711 | 1.173 |
| Cu <sub>5.133</sub> Sn <sub>1.866</sub> S <sub>6.65</sub> Cl <sub>0.35</sub>                          | 415   | 68.75   | 118325.00 | 1.938 | 0.120 |
| (SnTe) <sub>20</sub> Sb <sub>2</sub> Te <sub>3</sub>                                                  | 723   | 149.49  | 100127.00 | 2.370 | 0.683 |
| BiCuSeO                                                                                               | 639   | 177.63  | 3871.00   | 0.455 | 0.171 |
| Sn <sub>0.98</sub> In <sub>0.02</sub> Se                                                              | 623   | 493.00  | 125.00    | 0.620 | 0.029 |
| Mg <sub>3.5</sub> Gd <sub>0.01</sub> Sb <sub>2</sub>                                                  | 300   | -239.64 | 5971.00   | 1.191 | 0.086 |
| Cu <sub>3.0</sub> SbSe <sub>4</sub>                                                                   | 448   | 427.00  | 2803.00   | 1.500 | 0.153 |
| PbZn <sub>0.015</sub> Te                                                                              | 618   | -296.60 | 18800.00  | 1.122 | 0.937 |
| Cu <sub>5.133</sub> Sn <sub>1.866</sub> S <sub>6.65</sub> Cl <sub>0.35</sub>                          | 617   | 106.25  | 76610.00  | 1.500 | 0.356 |
| Sn <sub>0.96</sub> Pb <sub>0.01</sub> Cd <sub>0.035</sub> Se                                          | 723   | 377.33  | 3238.00   | 0.338 | 0.986 |
| Ag <sub>0.01</sub> Sn <sub>0.99</sub> Se <sub>0.65</sub> S <sub>0.35</sub>                            | 322   | 304.70  | 550.00    | 0.293 | 0.056 |
| Ba <sub>0.98</sub> K <sub>0.02</sub> Zn <sub>2</sub> As <sub>2</sub>                                  | 823   | 166.20  | 39530.00  | 1.521 | 0.591 |
| CuFeS <sub>2</sub>                                                                                    | 600   | -380.00 | 3914.00   | 2.615 | 0.130 |
| AgSn <sub>25.0</sub> BiTe <sub>27.0</sub>                                                             | 300   | 46.00   | 254808.00 | 3.410 | 0.047 |
| Mg <sub>0.99</sub> Li <sub>0.01</sub> Ge <sub>0.9</sub> Si <sub>0.1</sub>                             | 675   | 309.06  | 14769.00  | 2.660 | 0.358 |
| Ca <sub>1.58</sub> Yb <sub>3.42</sub> Al <sub>2</sub> Sb <sub>6</sub>                                 | 702   | 53.87   | 21250.00  | 3.250 | 0.013 |
| (CaZn <sub>0.4</sub> Ag <sub>0.2</sub> Sb) <sub>0.87</sub> (LiZnSb) <sub>0.13</sub>                   | 773   | 196.69  | 19428.00  | 0.574 | 1.039 |
| AgBi <sub>0.9</sub> Sb <sub>0.1</sub> Se <sub>2</sub>                                                 | 676   | -247.22 | 5464.00   | 0.401 | 0.563 |
| Ca <sub>14</sub> MgSb <sub>11</sub>                                                                   | 700   | 139.40  | 6250.00   | 0.680 | 0.125 |
| Hf <sub>0.5</sub> Ti <sub>0.5</sub> CoSb <sub>0.8</sub> Sn <sub>0.2</sub>                             | 574.6 | 225.67  | 39000.00  | 2.510 | 0.452 |
| AgBi <sub>0.94</sub> Pb <sub>0.06</sub> Se <sub>2.12</sub>                                            | 300   | 302.00  | 4080.00   | 0.600 | 0.186 |
| Rb <sub>2</sub> Bi <sub>8</sub> Se <sub>12.909</sub>                                                  | 330   | -142.30 | 15700.00  | 0.840 | 0.125 |
| Cu <sub>2</sub> Se <sub>0.92</sub> S <sub>0.08</sub>                                                  | 450   | 138.49  | 46648.00  | 0.794 | 0.507 |
| Cu <sub>11.9</sub> Gd <sub>0.1</sub> Sb <sub>4</sub> S <sub>13</sub>                                  | 425   | 90.62   | 103987.00 | 1.498 | 0.242 |
| Ta <sub>0.98</sub> Ti <sub>0.02</sub> FeSb                                                            | 470   | 237.00  | 51500.00  | 6.805 | 0.200 |

|                                                                                                         |     |         |           |       |       |
|---------------------------------------------------------------------------------------------------------|-----|---------|-----------|-------|-------|
| Ag <sub>8</sub> Sn <sub>0.5</sub> Ga <sub>0.5</sub> Se <sub>6</sub>                                     | 313 | -566.36 | 17.00     | 0.210 | 0.005 |
| Cr <sub>1.99</sub> Mn <sub>0.01</sub> Ge <sub>2</sub> Te <sub>6</sub>                                   | 713 | 292.78  | 4710.94   | 0.628 | 0.459 |
| Cu <sub>2.025</sub> Cd <sub>0.975</sub> SnSe <sub>4</sub>                                               | 450 | 183.40  | 6552.00   | 1.555 | 0.064 |
| Cu <sub>2</sub> Se <sub>0.88</sub> S <sub>0.12</sub>                                                    | 650 | 217.33  | 19622.00  | 0.644 | 0.935 |
| Mg <sub>3.5</sub> Ho <sub>0.03</sub> Sb <sub>1.97</sub> Te <sub>0.03</sub>                              | 300 | -200.00 | 27081.00  | 1.164 | 0.279 |
| Tl <sub>8.99</sub> Sb <sub>1.01</sub> Te <sub>6</sub>                                                   | 445 | 165.70  | 31743.00  | 0.570 | 0.680 |
| Cu <sub>2.88</sub> Ag <sub>0.12</sub> SbSe <sub>4</sub>                                                 | 573 | 361.00  | 7597.00   | 0.900 | 0.610 |
| TmCuTe <sub>2</sub>                                                                                     | 600 | 128.00  | 44182.00  | 1.164 | 0.373 |
| Ag <sub>8</sub> SnSe <sub>6</sub>                                                                       | 650 | -136.70 | 21890.00  | 0.427 | 0.623 |
| Ag <sub>0.01</sub> Sn <sub>0.99</sub> Se <sub>0.85</sub> S <sub>0.15</sub>                              | 813 | 314.96  | 2247.00   | 0.116 | 1.557 |
| Ce <sub>0.16</sub> Co <sub>4</sub> Sb <sub>12</sub>                                                     | 300 | -118    | 196000.00 | 2.200 | 0.200 |
| Ca <sub>3</sub> Al <sub>0.99</sub> Zn <sub>0.01</sub> Sb <sub>3</sub>                                   | 822 | 264.00  | 5100.00   | 0.718 | 0.437 |
| Sn <sub>0.95</sub> Mn <sub>0.05</sub> Te                                                                | 424 | 55.47   | 375148.00 | 5.316 | 0.092 |
| Ge <sub>0.89</sub> In <sub>0.05</sub> Pb <sub>0.06</sub> Te                                             | 325 | 136.81  | 63889.00  | 1.287 | 0.302 |
| Cu <sub>2</sub> Sn <sub>0.95</sub> Zn <sub>0.05</sub> S <sub>3</sub>                                    | 423 | 125.00  | 16438.00  | 1.210 | 0.090 |
| Ba <sub>8</sub> Ga <sub>15.88</sub> Zn <sub>0.007</sub> Sn <sub>30.12</sub>                             | 580 | 384.70  | 11890.00  | 1.251 | 0.816 |
| Rb <sub>2</sub> Bi <sub>8</sub> Se <sub>12.9935</sub> Cl <sub>0.0065</sub>                              | 823 | -215.35 | 5441.00   | 0.485 | 0.428 |
| (Cu <sub>3</sub> Sn <sub>4</sub> ) <sub>0.875</sub> (Ga <sub>2</sub> Te <sub>3</sub> ) <sub>0.125</sub> | 624 | 140.40  | 52117.00  | 1.681 | 0.381 |
| (SnTe) <sub>0.84</sub> (CuSbTe <sub>2</sub> ) <sub>0.16</sub>                                           | 625 | 105.40  | 141200.00 | 2.460 | 0.399 |
| SnTe <sub>0.2</sub> AgSbSe <sub>2</sub>                                                                 | 500 | 104.25  | 89262.00  | 1.200 | 0.466 |
| AgBi <sub>0.9</sub> Sb <sub>0.1</sub> Se <sub>2</sub>                                                   | 300 | 133.00  | 2.20      | 0.464 | 0.000 |
| Cu <sub>2</sub> ZnSn <sub>0.95</sub> Ag <sub>0.05</sub> Se <sub>4</sub>                                 | 323 | 34.37   | 258333.00 | 4.211 | 0.023 |
| Cu <sub>2</sub> Sn <sub>0.8</sub> Zn <sub>0.2</sub> S <sub>3</sub>                                      | 323 | 44.00   | 137534.00 | 2.575 | 0.033 |
| Ge <sub>0.85</sub> In <sub>0.05</sub> Pb <sub>0.1</sub> Te                                              | 375 | 219.50  | 29040.00  | 0.954 | 0.550 |
| (Cu <sub>3</sub> Sn <sub>4</sub> ) <sub>0.915</sub> (Ga <sub>2</sub> Te <sub>3</sub> ) <sub>0.085</sub> | 700 | 111.62  | 94370.00  | 2.769 | 0.297 |
| (CaZn <sub>0.4</sub> Ag <sub>0.2</sub> Sb) <sub>0.95</sub> (LiZnSb) <sub>0.05</sub>                     | 773 | 168.40  | 29020.00  | 0.795 | 0.800 |
| Ba <sub>8.02</sub> Cu <sub>4.98</sub> Si <sub>35</sub> Ge <sub>5.99</sub>                               | 763 | -99.70  | 85119.00  | 2.355 | 0.274 |
| (V <sub>0.6</sub> Nb <sub>0.4</sub> ) <sub>0.8</sub> Ti <sub>0.2</sub> FeSb                             | 300 | 143.50  | 114270.00 | 3.090 | 0.190 |
| Ba <sub>0.05</sub> Yb <sub>0.09</sub> Co <sub>4</sub> Sb <sub>12</sub>                                  | 600 | -225.86 | 82600.00  | 2.470 | 1.024 |
| Pb <sub>0.98</sub> Zn <sub>0.035</sub> Te                                                               | 821 | -255.80 | 26450.00  | 1.160 | 1.240 |
| Ag <sub>0.02</sub> Cr <sub>1.98</sub> Se <sub>3</sub>                                                   | 619 | 161.87  | 24800.00  | 1.551 | 0.259 |
| Ti <sub>0.98</sub> Mn <sub>0.02</sub> NiSn <sub>0.98</sub> Sb <sub>0.02</sub>                           | 797 | -149.40 | 150331.00 | 5.642 | 0.474 |
| PbTe                                                                                                    | 629 | -320.38 | 13224.00  | 1.186 | 0.736 |
| AgCuTe <sub>0.9</sub> Se <sub>0.1</sub>                                                                 | 623 | 214.00  | 21650.00  | 0.554 | 1.115 |
| ZrNiSn                                                                                                  | 972 | -151.40 | 96111.00  | 3.951 | 0.542 |
| Cu <sub>2</sub> Se <sub>0.96</sub> S <sub>0.04</sub>                                                    | 650 | 182.57  | 32745.00  | 0.832 | 0.853 |
| Mg <sub>3</sub> Sb <sub>1.6</sub> Bi <sub>0.4</sub>                                                     | 565 | 246.00  | 2010.00   | 0.530 | 0.130 |
| Cu <sub>1.975</sub> S <sub>0.5</sub> Se <sub>0.5</sub>                                                  | 772 | 186.00  | 31800.00  | 0.874 | 0.972 |
| Ba <sub>0.16</sub> Co <sub>4</sub> Sb <sub>11.85</sub>                                                  | 300 | -132    | 213800.00 | 4.600 | 0.200 |
| AgSn <sub>5.0</sub> BiTe <sub>7.0</sub>                                                                 | 500 | 137.00  | 77885.00  | 1.824 | 0.401 |
| Ag <sub>1.3</sub> Sb <sub>0.9</sub> Pb <sub>15.7</sub> Te <sub>22.0</sub>                               | 673 | 140.80  | 2317.00   | 1.060 | 0.029 |

|                                                                                             |      |         |           |        |       |
|---------------------------------------------------------------------------------------------|------|---------|-----------|--------|-------|
| Sr <sub>0.21</sub> Yb <sub>0.03</sub> Co <sub>4</sub> Sb <sub>12.12</sub>                   | 550  | -153.00 | 227273.00 | 3.720  | 0.787 |
| Sn <sub>0.98</sub> Ce <sub>0.02</sub> Te                                                    | 523  | 66.00   | 213924.00 | 3.330  | 0.146 |
| Sn <sub>0.91</sub> Mn <sub>0.09</sub> Te                                                    | 424  | 75.00   | 235503.00 | 3.671  | 0.153 |
| Bi <sub>0.8</sub> Pb <sub>0.1</sub> Yb <sub>0.1</sub> CuSeO                                 | 347  | 81.25   | 30000.00  | 0.776  | 0.089 |
| Cu <sub>5.133</sub> Sn <sub>1.866</sub> S <sub>6.3</sub> Cl <sub>0.7</sub>                  | 685  | 126.99  | 51954.00  | 1.325  | 0.433 |
| Cu <sub>0.995</sub> Pd <sub>0.005</sub> FeS <sub>2</sub>                                    | 200  | -395.40 | 3652.00   | 12.160 | 0.009 |
| Cu <sub>2</sub> Mo <sub>6</sub> Te <sub>8</sub>                                             | 500  | 3.24    | 214200.00 | 3.310  | 0.000 |
| Cu <sub>2.1</sub> Se                                                                        | 572  | 84.30   | 162200.00 | 2.263  | 0.291 |
| In <sub>0.15</sub> Co <sub>4</sub> Sb <sub>11.95</sub>                                      | 300  | -202    | 103000.00 | 2.600  | 0.400 |
| VFeSb                                                                                       | 550  | -204.60 | 75900.00  | 4.964  | 0.343 |
| Bi <sub>0.84</sub> Pb <sub>0.08</sub> Yb <sub>0.08</sub> CuSeO                              | 446  | 107.89  | 22326.00  | 0.655  | 0.177 |
| NbCoSn <sub>0.9</sub> Sb <sub>0.1</sub>                                                     | 530  | -115.05 | 130000.00 | 5.792  | 0.157 |
| CoSi <sub>0.995</sub> B <sub>0.005</sub>                                                    | 320  | -82.28  | 705300.00 | 14.060 | 0.108 |
| Cu <sub>2</sub> Se <sub>0.5</sub> S <sub>0.5</sub>                                          | 613  | 97.52   | 79143.00  | 1.005  | 0.459 |
| BiCu <sub>0.975</sub> SeO                                                                   | 923  | 279.00  | 5220.00   | 0.477  | 0.786 |
| Ag <sub>2</sub> Se <sub>1.04</sub>                                                          | 311  | -145.32 | 106721.00 | 0.944  | 0.767 |
| GeTe                                                                                        | 598  | 89.35   | 243299.00 | 3.380  | 0.344 |
| YbCd <sub>1.1</sub> Zn <sub>0.9</sub> Sb <sub>2</sub>                                       | 650  | 134.50  | 79800.00  | 1.330  | 0.670 |
| Ba <sub>8.03</sub> Cu <sub>5</sub> Ge <sub>40.97</sub>                                      | 661  | -166.80 | 30340.00  | 1.280  | 0.437 |
| Ca <sub>0.05</sub> BaGd <sub>1.95</sub> NiO <sub>5</sub>                                    | 939  | 244.85  | 95.06     | 1.439  | 0.004 |
| Cu <sub>2</sub> Zn <sub>0.4</sub> Fe <sub>0.6</sub> SnSe <sub>4</sub>                       | 473  | 214.45  | 4302.00   | 1.425  | 0.066 |
| Ag <sub>3.5</sub> Mo <sub>9</sub> Se <sub>11</sub>                                          | 447  | 89.60   | 48100.00  | 1.180  | 0.146 |
| Bi <sub>1.9</sub> Nb <sub>0.1</sub> Te <sub>3</sub>                                         | 306  | -100.40 | 64510.00  | 0.856  | 0.232 |
| Ag <sub>2</sub> Se <sub>1.01</sub>                                                          | 377  | -134.47 | 141200.00 | 1.140  | 0.840 |
| AgSb <sub>0.93</sub> Mn <sub>0.07</sub> Te <sub>2</sub>                                     | 541  | 133.51  | 77973.00  | 1.197  | 0.628 |
| Eu(Zn <sub>0.7</sub> Cd <sub>0.3</sub> ) <sub>2</sub> Sb <sub>2</sub>                       | 350  | 163.00  | 53100.00  | 1.670  | 0.296 |
| Cu <sub>2</sub> Se <sub>0.98</sub> S <sub>0.02</sub>                                        | 333  | 94.41   | 114384.00 | 0.840  | 0.404 |
| (Sn <sub>0.985</sub> In <sub>0.015</sub> Te) <sub>0.9</sub> (AgCl) <sub>0.1</sub>           | 723  | 112.90  | 180899.00 | 2.622  | 0.636 |
| K <sub>0.995</sub> Ba <sub>0.005</sub> GaSb <sub>4</sub>                                    | 509  | -268.37 | 6822.00   | 0.669  | 0.374 |
| Sr <sub>0.16</sub> Yb <sub>0.03</sub> Co <sub>4</sub> Sb <sub>11.82</sub>                   | 400  | -136.00 | 249091.00 | 3.740  | 0.493 |
| Cu <sub>1.5</sub> S                                                                         | 500  | 21.24   | 473810.00 | 5.147  | 0.021 |
| Ag(Bi <sub>0.85</sub> Pb <sub>0.15</sub> ) <sub>0.7</sub> Sb <sub>0.3</sub> Se <sub>2</sub> | 326  | 389.19  | 605.00    | 0.564  | 0.053 |
| Bi <sub>2</sub> Si <sub>2</sub> Te <sub>6</sub>                                             | 473  | 160.64  | 10694.00  | 0.754  | 0.173 |
| Sr <sub>14.1</sub> Ga <sub>29.6</sub> Ge <sub>56.3</sub>                                    | 568  | -150.70 | 46800.00  | 1.740  | 0.347 |
| FeNb <sub>0.88</sub> Hf <sub>0.12</sub> Sb                                                  | 1100 | 235.44  | 94600.00  | 4.270  | 1.360 |
| Ag <sub>0.5</sub> Sb <sub>1.1</sub> Pb <sub>19.6</sub> Te <sub>18.8</sub>                   | 373  | 4.80    | 31795.00  | 1.725  | 0.000 |
| Mg <sub>2</sub> Zn <sub>1.02</sub> Sb <sub>2</sub>                                          | 473  | 96.69   | 2052.00   | 0.732  | 0.012 |
| Ti <sub>0.97</sub> Mn <sub>0.03</sub> NiSn <sub>0.97</sub> Sb <sub>0.03</sub>               | 797  | -146.12 | 137100.00 | 5.475  | 0.426 |
| (PbTe) <sub>0.15</sub> (Ag <sub>2</sub> Te) <sub>0.85</sub>                                 | 300  | -102.50 | 95750.00  | 0.976  | 0.420 |
| Ba <sub>0.15</sub> In <sub>0.16</sub> Co <sub>4</sub> Sb <sub>11.83</sub>                   | 300  | -139    | 182900.00 | 1.600  | 0.400 |
| (Sn <sub>0.8</sub> Ge <sub>0.2</sub> ) <sub>0.82</sub> Mn <sub>0.18</sub> Te                | 873  | 153.00  | 80600.00  | 1.512  | 1.089 |

|                                                                                                       |     |         |           |        |       |
|-------------------------------------------------------------------------------------------------------|-----|---------|-----------|--------|-------|
| Cu <sub>1.55</sub> S                                                                                  | 300 | 8.30    | 539423.00 | 3.843  | 0.003 |
| Cu <sub>0.98</sub> Pd <sub>0.02</sub> FeS <sub>2</sub>                                                | 100 | -116.00 | 9306.00   | 13.980 | 0.001 |
| Se <sub>0.05</sub> Co <sub>4</sub> Sb <sub>11.9</sub> Se <sub>0.1</sub>                               | 800 | -172    | 21900.00  | 3.100  | 0.200 |
| Ag(Bi <sub>0.8</sub> Nb <sub>0.2</sub> ) <sub>0.7</sub> Sb <sub>0.3</sub> Se <sub>2</sub>             | 478 | -225.00 | 2818.00   | 0.493  | 0.138 |
| Yb <sub>14</sub> MgSb <sub>11</sub>                                                                   | 900 | 205.07  | 13816.00  | 0.711  | 0.736 |
| Al <sub>0.02</sub> Ge <sub>0.98</sub> Te                                                              | 673 | 118.39  | 258929.00 | 3.838  | 0.636 |
| Ca <sub>5</sub> Al <sub>1.9</sub> Zn <sub>0.1</sub> Sb <sub>6</sub>                                   | 624 | 149.20  | 19350.00  | 1.096  | 0.245 |
| Zn <sub>0.95</sub> Cd <sub>0.05</sub> Sc <sub>0.02</sub> O <sub>1.03</sub>                            | 300 | -60.00  | 18000.00  | 11.500 | 0.002 |
| (Sn <sub>0.985</sub> In <sub>0.015</sub> Te) <sub>0.85</sub> (AgCl) <sub>0.15</sub>                   | 823 | 132.46  | 122472.00 | 2.180  | 0.811 |
| Ag <sub>0.01</sub> Sn <sub>0.99</sub> Se                                                              | 616 | 416.00  | 653.00    | 0.290  | 0.240 |
| Yb <sub>14</sub> MgSb <sub>11</sub>                                                                   | 400 | 81.50   | 27500.00  | 0.810  | 0.090 |
| Cu <sub>2</sub> ZnSn <sub>0.925</sub> Ag <sub>0.075</sub> Se <sub>4</sub>                             | 323 | 45.07   | 79487.00  | 3.936  | 0.013 |
| Zn <sub>0.9</sub> Cd <sub>0.1</sub> Sc <sub>0.03</sub> O <sub>1.045</sub>                             | 573 | -92.70  | 44000.00  | 4.930  | 0.044 |
| (Cu <sub>3</sub> Sn <sub>4</sub> ) <sub>0.85</sub> (Ga <sub>2</sub> Te <sub>3</sub> ) <sub>0.15</sub> | 429 | 102.02  | 50000.00  | 1.632  | 0.137 |
| ZrNiPb <sub>0.98</sub> Bi <sub>0.02</sub>                                                             | 771 | -156.33 | 204869.00 | 7.110  | 0.543 |
| Zn <sub>0.9</sub> Cd <sub>0.1</sub> Sc <sub>0.02</sub> O <sub>1.03</sub>                              | 573 | -99.00  | 47570.00  | 5.000  | 0.053 |
| Al <sub>0.03</sub> Ge <sub>0.97</sub> Te                                                              | 373 | 47.68   | 483929.00 | 5.626  | 0.073 |
| CuGaTe <sub>2</sub>                                                                                   | 818 | 248.40  | 23700.00  | 2.240  | 0.534 |
| CuAgTe <sub>0.6</sub> Se <sub>0.4</sub>                                                               | 408 | 237.77  | 7229.00   | 0.340  | 0.491 |
| (SnTe) <sub>0.9</sub> (CuSbTe <sub>2</sub> ) <sub>0.1</sub>                                           | 723 | 146.70  | 102498.00 | 2.025  | 0.788 |
| Ag <sub>1.3</sub> Sb <sub>0.9</sub> Pb <sub>15.7</sub> Te <sub>22.0</sub>                             | 573 | -91.20  | 1250.00   | 1.028  | 0.006 |
| (Cu <sub>0.002</sub> Pb <sub>0.998</sub> Te)(MnTe) <sub>0.03</sub>                                    | 523 | -168.95 | 84247.00  | 1.645  | 0.764 |
| Sn <sub>0.9</sub> Pb <sub>0.09</sub> Zn <sub>0.01</sub> Se                                            | 473 | 578.93  | 306.00    | 0.750  | 0.065 |
| Bi <sub>1.92</sub> Nb <sub>0.08</sub> Te <sub>3</sub>                                                 | 505 | -121.20 | 98571.00  | 0.779  | 0.939 |
| Ti <sub>0.95</sub> Mn <sub>0.05</sub> NiSn <sub>0.95</sub> Sb <sub>0.05</sub>                         | 871 | -155.50 | 162300.00 | 5.715  | 0.598 |
| (Bi <sub>0.23</sub> Sb <sub>0.77</sub> ) <sub>2</sub> Te <sub>3</sub>                                 | 350 | 244.00  | 44766.00  | 0.880  | 1.060 |
| Mg <sub>0.97</sub> Li <sub>0.03</sub> Ge <sub>0.8</sub> Si <sub>0.2</sub>                             | 400 | 315.44  | 7308.00   | 3.340  | 0.087 |
| SnAgSbSe <sub>2</sub>                                                                                 | 750 | 102.56  | 153061.00 | 3.770  | 0.323 |
| Ba <sub>8.04</sub> Cu <sub>4.9</sub> Si <sub>3.23</sub> Ge <sub>37.83</sub>                           | 810 | -143.10 | 45500.00  | 1.526  | 0.495 |
| BiSb(Se <sub>0.96</sub> Br <sub>0.04</sub> ) <sub>3</sub>                                             | 400 | -141.00 | 19000.00  | 0.590  | 0.280 |
| Bi <sub>1.2</sub> Sb <sub>0.8</sub> Se <sub>2.76</sub> Cl <sub>0.24</sub>                             | 700 | -188.00 | 15900.00  | 0.570  | 0.690 |
| Ge <sub>0.99</sub> Te                                                                                 | 673 | 133.50  | 281188.00 | 3.500  | 0.963 |
| Sn <sub>1.03</sub> Se <sub>0.08</sub> Te <sub>0.92</sub>                                              | 823 | 157.20  | 65800.00  | 2.520  | 0.540 |
| Ca <sub>5</sub> In <sub>1.98</sub> Zn <sub>0.02</sub> Sb <sub>6</sub>                                 | 622 | 299.40  | 4794.00   | 0.728  | 0.358 |
| Mg <sub>3.5</sub> Gd <sub>0.04</sub> Sb <sub>2</sub>                                                  | 700 | -303.80 | 11322.00  | 0.626  | 1.168 |
| Eu(Zn <sub>0.7</sub> Cd <sub>0.3</sub> ) <sub>2</sub> Sb <sub>2</sub>                                 | 650 | 221.00  | 30500.00  | 1.117  | 0.867 |
| Cu <sub>1.95</sub> In <sub>0.05</sub> Se                                                              | 770 | 336.63  | 1351.00   | 1.663  | 0.181 |
| Se <sub>0.15</sub> Co <sub>4</sub> Sb <sub>11.7</sub> Se <sub>0.3</sub>                               | 600 | -339    | 10200.00  | 1.900  | 0.400 |
| Ba <sub>0.25</sub> Co <sub>4</sub> Sb <sub>11.91</sub>                                                | 850 | -192    | 77500.00  | 3.200  | 0.500 |
| Cu <sub>1.85</sub> Se                                                                                 | 706 | 57.76   | 221154.00 | 3.439  | 0.151 |
| Ca <sub>3</sub> Co <sub>3.7</sub> Ti <sub>0.3</sub> O <sub>9</sub>                                    | 500 | 217.00  | 4580.00   | 2.172  | 0.050 |

|                                                                                                                     |     |         |           |       |       |
|---------------------------------------------------------------------------------------------------------------------|-----|---------|-----------|-------|-------|
| SnTe                                                                                                                | 519 | 37.50   | 397633.00 | 5.671 | 0.051 |
| Hf <sub>0.5</sub> Ti <sub>0.5</sub> CoSb <sub>0.8</sub> Sn <sub>0.2</sub>                                           | 473 | 212.45  | 40000.00  | 2.514 | 0.340 |
| BiCuSeO                                                                                                             | 737 | 213.16  | 3238.00   | 0.383 | 0.283 |
| CoGeTe                                                                                                              | 478 | -171.10 | 6120.00   | 6.455 | 0.013 |
| CsTb <sub>2</sub> Ag <sub>3</sub> Te <sub>5</sub>                                                                   | 385 | 61.93   | 272.59    | 0.508 | 0.001 |
| Cu <sub>2</sub> Se <sub>0.92</sub> I <sub>0.08</sub>                                                                | 450 | 209.00  | 9353.00   | 0.518 | 0.355 |
| Ta <sub>0.92</sub> Ti <sub>0.08</sub> FeSb                                                                          | 870 | 246.00  | 80100.00  | 4.180 | 1.009 |
| Sm <sub>0.2</sub> Bi <sub>1.8</sub> Te <sub>3</sub>                                                                 | 423 | -152.27 | 64000.00  | 0.621 | 1.011 |
| In <sub>0.015</sub> Pb <sub>0.985</sub> Te <sub>0.996</sub> I <sub>0.004</sub>                                      | 533 | -231.30 | 20100.00  | 1.330 | 0.431 |
| Ge <sub>0.55</sub> Pb <sub>0.45</sub> Te <sub>0.4</sub> Se <sub>0.6</sub>                                           | 370 | 257.50  | 8070.00   | 0.799 | 0.248 |
| GeTe                                                                                                                | 648 | 117.10  | 192784.00 | 2.813 | 0.609 |
| SnS                                                                                                                 | 400 | 579.00  | 0.50      | 1.090 | 0.000 |
| Cu <sub>1.8</sub> Se                                                                                                | 374 | 22.28   | 691892.00 | 5.950 | 0.022 |
| Sb <sub>0.05</sub> Ge <sub>0.95</sub> Te                                                                            | 573 | 156.30  | 136488.00 | 2.382 | 0.802 |
| Ca <sub>5</sub> Ga <sub>1.7</sub> Zn <sub>0.3</sub> Sb <sub>6</sub>                                                 | 525 | 79.80   | 56855.00  | 1.550 | 0.123 |
| AgMo <sub>6</sub> Te <sub>8</sub>                                                                                   | 700 | 25.53   | 170069.00 | 4.398 | 0.018 |
| LiGe <sub>3.5</sub> Sb <sub>2</sub> Te <sub>7</sub>                                                                 | 523 | 241.00  | 34400.00  | 0.947 | 1.040 |
| Cu <sub>2</sub> Zn <sub>0.6</sub> Fe <sub>0.4</sub> SnSe <sub>4</sub>                                               | 373 | 263.87  | 86.92     | 2.488 | 0.001 |
| Er <sub>0.02</sub> (Bi <sub>0.23</sub> Sb <sub>0.77</sub> ) <sub>1.98</sub> Te <sub>3</sub>                         | 450 | 222.11  | 35000.00  | 0.949 | 0.819 |
| CrSe <sub>3</sub>                                                                                                   | 671 | 164.30  | 22000.00  | 1.826 | 0.218 |
| Ti <sub>0.5</sub> Zr <sub>0.25</sub> Hf <sub>0.25</sub> NiSn <sub>0.998</sub> Sb <sub>0.002</sub>                   | 824 | -206.50 | 85460.00  | 0.760 | 1.210 |
| ZrNiPb <sub>0.98</sub> Bi <sub>0.02</sub>                                                                           | 475 | -121.22 | 306000.00 | 8.590 | 0.249 |
| AgSn <sub>5.0</sub> BiTe <sub>7.0</sub>                                                                             | 400 | 131.25  | 83700.00  | 1.630 | 0.354 |
| Nb <sub>0.8</sub> CoSb                                                                                              | 299 | -174.20 | 20330.00  | 4.170 | 0.040 |
| Ag <sub>0.98</sub> Nb <sub>0.02</sub> BiSe <sub>2.0</sub>                                                           | 296 | -121.40 | 13800.00  | 0.700 | 0.086 |
| Bi <sub>0.48</sub> Sb <sub>1.52</sub> Te <sub>3</sub>                                                               | 300 | 228.20  | 64770.00  | 1.258 | 0.804 |
| Mg <sub>1.96</sub> Li <sub>0.04</sub> Zn <sub>0.98</sub> Sb <sub>2</sub>                                            | 573 | 90.48   | 84233.00  | 1.175 | 0.336 |
| Mg <sub>2.16</sub> (Si <sub>0.4</sub> Sn <sub>0.6</sub> ) <sub>0.98</sub> Bi <sub>0.02</sub>                        | 600 | -188.10 | 110670.00 | 2.285 | 1.028 |
| EuZn <sub>2</sub> Sb <sub>2</sub>                                                                                   | 350 | 130.00  | 103700.00 | 2.260 | 0.271 |
| Ag <sub>2</sub> Se <sub>1.0025</sub>                                                                                | 305 | -139.79 | 118033.00 | 0.912 | 0.771 |
| Cu <sub>2</sub> Se <sub>0.92</sub> I <sub>0.08</sub>                                                                | 385 | 180.00  | 10760.00  | 0.506 | 0.266 |
| SnTe <sub>0.1</sub> AgSbSe <sub>2</sub>                                                                             | 800 | 143.25  | 83893.00  | 1.912 | 0.720 |
| YbSi <sub>2</sub>                                                                                                   | 330 | -51.00  | 730100.00 | 8.760 | 0.072 |
| TiNiSn                                                                                                              | 871 | -139.20 | 120861.00 | 6.322 | 0.323 |
| Pb <sub>0.995</sub> Zn <sub>0.02</sub> Te                                                                           | 318 | -213.00 | 80921.00  | 2.280 | 0.503 |
| In <sub>3.96</sub> Pb <sub>0.04</sub> Se <sub>3</sub>                                                               | 480 | -245.00 | 10000.00  | 0.910 | 0.317 |
| Ag(Bi <sub>0.8</sub> Nb <sub>0.2</sub> ) <sub>0.7</sub> Sb <sub>0.3</sub> Se <sub>2</sub>                           | 326 | -149.00 | 12303.00  | 0.810 | 0.110 |
| (Ag <sub>0.05</sub> Sb <sub>0.05</sub> Sn <sub>0.9</sub> )(S <sub>0.05</sub> Se <sub>0.05</sub> Te <sub>0.9</sub> ) | 594 | 106.93  | 137383.00 | 2.500 | 0.373 |
| Ge <sub>12</sub> Sb <sub>2</sub> Te <sub>15</sub>                                                                   | 723 | 257.00  | 42700.00  | 1.480 | 1.384 |
| Nb <sub>0.95</sub> Ta <sub>0.05</sub> CoSn <sub>0.9</sub> Sb <sub>0.1</sub>                                         | 530 | -119.04 | 127092.00 | 4.958 | 0.193 |
| Cu <sub>1.97</sub> In <sub>0.03</sub> Se                                                                            | 473 | 139.11  | 47651.00  | 0.900 | 0.490 |



|                                                                                            |      |         |           |       |       |
|--------------------------------------------------------------------------------------------|------|---------|-----------|-------|-------|
| TiNiSn                                                                                     | 297  | -165.41 | 32450.00  | 4.705 | 0.056 |
| Ba <sub>0.98</sub> K <sub>0.02</sub> Zn <sub>2</sub> As <sub>2</sub>                       | 523  | 113.58  | 80000.00  | 2.078 | 0.260 |
| ZrNiSn <sub>0.98</sub> Bi <sub>0.02</sub>                                                  | 673  | -211.00 | 54100.00  | 6.846 | 0.237 |
| Yb <sub>12</sub> CaBaMgSb <sub>11</sub>                                                    | 800  | 167.68  | 16623.00  | 0.714 | 0.524 |
| (Cu <sub>0.002</sub> Pb <sub>0.998</sub> Te)(MnTe) <sub>0.03</sub>                         | 323  | -218.95 | 49517.00  | 1.789 | 0.429 |
| LiGe <sub>3.5</sub> Sb <sub>2</sub> Te <sub>7</sub>                                        | 623  | 260.80  | 33300.00  | 0.924 | 1.362 |
| BiSb(Se <sub>0.92</sub> Br <sub>0.08</sub> ) <sub>3</sub>                                  | 400  | -138.00 | 23883.00  | 0.570 | 0.319 |
| (Cu <sub>0.001</sub> Pb <sub>0.999</sub> Te)(MnTe) <sub>0.03</sub>                         | 823  | -247.36 | 26200.00  | 1.150 | 1.147 |
| Ba <sub>0.08</sub> La <sub>0.05</sub> Yb <sub>0.08</sub> Co <sub>4</sub> Sb <sub>12</sub>  | 850  | -198    | 134400.00 | 0.400 | 1.700 |
| ZrNiSn <sub>0.98</sub> Bi <sub>0.02</sub>                                                  | 871  | -197.35 | 69570.00  | 7.000 | 0.337 |
| Ba <sub>8.02</sub> Cu <sub>4.98</sub> Si <sub>35</sub> Ge <sub>5.99</sub>                  | 566  | -78.50  | 109000.00 | 2.250 | 0.168 |
| NbCo <sub>0.9</sub> Ni <sub>0.1</sub> Sn                                                   | 902  | -206.67 | 54201.00  | 5.833 | 0.358 |
| Ca <sub>11</sub> Sb <sub>10</sub>                                                          | 608  | 15.10   | 2268.00   | 1.009 | 0.000 |
| CuAgTe <sub>0.6</sub> Se <sub>0.4</sub>                                                    | 393  | 228.53  | 7771.00   | 0.237 | 0.672 |
| Y <sub>0.2</sub> Bi <sub>1.8</sub> Te <sub>3</sub>                                         | 473  | -152.13 | 62334.00  | 0.753 | 0.906 |
| NbCo <sub>0.94</sub> Ni <sub>0.06</sub> Sn                                                 | 798  | -95.29  | 112558.00 | 6.726 | 0.121 |
| In <sub>4</sub> Pb <sub>0.01</sub> Sn <sub>0.03</sub> Se <sub>2.9</sub> Cl <sub>0.06</sub> | 473  | -222.00 | 7700.00   | 0.720 | 0.520 |
| (GeTe) <sub>0.8</sub> (AgSnSe <sub>2</sub> ) <sub>0.2</sub>                                | 623  | 55.90   | 185806.00 | 2.510 | 0.144 |
| Ge <sub>0.98</sub> Mn <sub>0.02</sub> Te                                                   | 598  | 109.68  | 190722.00 | 3.027 | 0.453 |
| Bi <sub>0.88</sub> Pb <sub>0.06</sub> Yb <sub>0.06</sub> CuSeO                             | 543  | 148.68  | 25600.00  | 0.523 | 0.588 |
| Ag(Bi <sub>0.8</sub> Pb <sub>0.2</sub> ) <sub>0.9</sub> Sb <sub>0.1</sub> Se <sub>2</sub>  | 576  | 136.11  | 838.00    | 0.604 | 0.015 |
| Cu <sub>7</sub> P(S <sub>0.75</sub> Se <sub>0.25</sub> ) <sub>6</sub>                      | 623  | 310.06  | 1585.00   | 0.220 | 0.432 |
| Cu <sub>1.97</sub> In <sub>0.03</sub> Se                                                   | 374  | 120.30  | 71141.00  | 0.613 | 0.628 |
| Yb <sub>13.6</sub> Ce <sub>0.363</sub> Mn <sub>0.99</sub> Sb <sub>11.05</sub>              | 1173 | 221.25  | 12999.00  | 0.770 | 0.969 |
| Y <sub>0.2</sub> Bi <sub>1.8</sub> Te <sub>3</sub>                                         | 373  | -138.40 | 84900.00  | 0.631 | 0.963 |
| Ca <sub>3</sub> Co <sub>3.8</sub> Ti <sub>0.2</sub> O <sub>9</sub>                         | 700  | 203.46  | 6054.00   | 2.110 | 0.083 |
| (Sn <sub>0.8</sub> Ge <sub>0.2</sub> ) <sub>0.91</sub> Mn <sub>0.09</sub> Te               | 773  | 132.70  | 107400.00 | 1.945 | 0.752 |
| Cu <sub>2.9</sub> Ag <sub>0.1</sub> ErTe <sub>3</sub>                                      | 900  | 133.00  | 35000.00  | 0.660 | 0.844 |
| Pb <sub>0.99</sub> Tl <sub>0.005</sub> Na <sub>0.005</sub> Te                              | 397  | 159.30  | 63900.00  | 1.949 | 0.330 |
| Cu <sub>2</sub> Se                                                                         | 375  | 114.57  | 64785.00  | 0.540 | 0.591 |
| Cu <sub>2</sub> Se <sub>0.92</sub> S <sub>0.08</sub>                                       | 333  | 106.91  | 93820.00  | 0.684 | 0.522 |
| AgSb <sub>0.93</sub> Mn <sub>0.07</sub> Te <sub>2</sub>                                    | 344  | 71.30   | 111141.00 | 1.125 | 0.173 |
| AgCuTe <sub>0.9</sub> Se <sub>0.1</sub>                                                    | 320  | 172.00  | 34854.00  | 0.453 | 0.745 |
| Sn <sub>0.93</sub> Pb <sub>0.06</sub> Zn <sub>0.01</sub> Se                                | 473  | 532.62  | 656.00    | 0.591 | 0.155 |
| Mg <sub>3.5</sub> Gd <sub>0.01</sub> Sb <sub>2</sub>                                       | 600  | -308.80 | 5926.00   | 0.786 | 0.431 |
| Yb <sub>13.6</sub> Ce <sub>0.363</sub> Mn <sub>0.99</sub> Sb <sub>11.05</sub>              | 300  | 31.25   | 49029.00  | 0.857 | 0.017 |
| Sr <sub>0.16</sub> Yb <sub>0.03</sub> Co <sub>4</sub> Sb <sub>11.82</sub>                  | 750  | -184.00 | 160000.00 | 3.460 | 1.174 |
| Ag <sub>0.97</sub> Cr <sub>0.97</sub> Sb <sub>0.03</sub> Se <sub>2</sub>                   | 303  | 74.15   | 32414.00  | 0.544 | 0.099 |
| Sn <sub>0.91</sub> Mn <sub>0.09</sub> Te <sub>0.97</sub> l <sub>0.03</sub>                 | 867  | 213.92  | 47179.00  | 1.534 | 1.220 |
| Tl <sub>9.0</sub> Sb <sub>0.98</sub> Te <sub>6</sub>                                       | 385  | 133.00  | 40734.00  | 0.637 | 0.435 |
| Ba <sub>0.03</sub> Co <sub>4</sub> Sb <sub>12.05</sub>                                     | 300  | -220    | 39900.00  | 5.100 | 0.100 |

|                                                                                            |      |         |           |        |       |
|--------------------------------------------------------------------------------------------|------|---------|-----------|--------|-------|
| La <sub>0.1</sub> Co <sub>4</sub> Sb <sub>12</sub>                                         | 373  | 70.74   | 25688.00  | 3.686  | 0.013 |
| Ag <sub>0.01</sub> Sn <sub>0.99</sub> Se <sub>0.8</sub> S <sub>0.2</sub>                   | 616  | 449.60  | 452.00    | 0.160  | 0.351 |
| Mg <sub>2</sub> Cu <sub>3</sub> In <sub>3</sub> Te <sub>8</sub>                            | 473  | 334.20  | 2275.00   | 2.075  | 0.058 |
| In <sub>4</sub> Se <sub>2.67</sub> Cl <sub>0.03</sub>                                      | 423  | -137.08 | 71050.00  | 0.742  | 0.761 |
| Ag <sub>3.4</sub> Mo <sub>9</sub> Se <sub>11</sub>                                         | 547  | 104.40  | 41950.00  | 1.200  | 0.205 |
| BiCuSeO                                                                                    | 573  | 390.00  | 1218.00   | 0.541  | 0.196 |
| Eu(Zn <sub>0.5</sub> Cd <sub>0.5</sub> ) <sub>2</sub> Sb <sub>2</sub>                      | 300  | 172.50  | 31480.00  | 1.595  | 0.176 |
| In <sub>4</sub> Pb <sub>0.01</sub> Sn <sub>0.03</sub> Se <sub>2.9</sub> Cl <sub>0.04</sub> | 323  | -197.80 | 6700.00   | 0.911  | 0.093 |
| Cu <sub>3</sub> Sb <sub>0.996</sub> In <sub>0.004</sub> Se <sub>4</sub>                    | 473  | 290.00  | 7000.00   | 1.420  | 0.196 |
| Se <sub>0.2</sub> Co <sub>4</sub> Sb <sub>11.6</sub> Se <sub>0.4</sub>                     | 800  | -218    | 21500.00  | 2.200  | 0.300 |
| GeSe <sub>0.5</sub> Te <sub>0.5</sub>                                                      | 530  | 88.91   | 157407.00 | 2.269  | 0.291 |
| As <sub>2</sub> Te <sub>2.9</sub> Se <sub>0.1</sub>                                        | 298  | 161.39  | 507.41    | 0.721  | 0.018 |
| SnS <sub>0.88</sub> Se <sub>0.12</sub>                                                     | 573  | 250.00  | 23000.00  | 1.270  | 0.704 |
| Eu <sub>0.03</sub> Co <sub>4</sub> Sb <sub>12</sub>                                        | 300  | -235    | 28900.00  | 6.000  | 0.100 |
| CuFeS <sub>2</sub>                                                                         | 50   | -486.00 | 132.00    | 30.450 | 0.000 |
| (Zr <sub>0.4</sub> Hf <sub>0.6</sub> ) <sub>0.88</sub> Nb <sub>0.12</sub> CoSb             | 1174 | -212.70 | 58890.00  | 2.040  | 0.990 |
| Ge <sub>0.99</sub> Mn <sub>0.01</sub> Te                                                   | 648  | 144.84  | 136082.00 | 2.471  | 0.749 |
| Sn <sub>0.9</sub> Pb <sub>0.09</sub> Zn <sub>0.01</sub> Se                                 | 773  | 386.62  | 4275.00   | 0.480  | 1.028 |
| Yb <sub>11</sub> Ca <sub>2</sub> BaMgSb <sub>11</sub>                                      | 600  | 130.40  | 18950.00  | 0.671  | 0.288 |
| Ge <sub>0.55</sub> Pb <sub>0.45</sub> Te <sub>0.2</sub> Se <sub>0.8</sub>                  | 721  | 210.63  | 6790.00   | 0.865  | 0.031 |
| Ag <sub>1.2</sub> Sb <sub>0.8</sub> Pb <sub>14.9</sub> Te <sub>22.7</sub>                  | 573  | 289.60  | 2112.00   | 0.955  | 0.106 |
| (SnTe) <sub>20</sub> Sb <sub>2</sub> Te <sub>3</sub>                                       | 523  | 87.41   | 186370.00 | 3.420  | 0.218 |
| Mg <sub>3.5</sub> Ho <sub>0.04</sub> Sb <sub>1.97</sub> Te <sub>0.03</sub>                 | 600  | -254.00 | 18676.00  | 0.838  | 0.863 |
| Li <sub>2</sub> Ge <sub>11</sub> Sb <sub>2</sub> Te <sub>15</sub>                          | 623  | 180.67  | 103889.00 | 1.737  | 1.217 |
| Yb <sub>14</sub> MgBi <sub>11</sub>                                                        | 424  | 36.14   | 70192.00  | 1.679  | 0.023 |
| MgAgSb                                                                                     | 450  | 206.36  | 36909.00  | 0.971  | 0.729 |
| Mg <sub>3</sub> Sb <sub>1.6</sub> Bi <sub>0.4</sub>                                        | 332  | 142.00  | 3455.00   | 0.950  | 0.024 |
| Tl <sub>4</sub> SnTe <sub>3</sub>                                                          | 423  | 145.00  | 20000.00  | 0.448  | 0.390 |
| Cu <sub>1.99</sub> In <sub>0.01</sub> Se                                                   | 672  | 193.50  | 31757.00  | 0.838  | 0.966 |
| Ag(Bi <sub>0.9</sub> Pb <sub>0.1</sub> ) <sub>0.7</sub> Sb <sub>0.3</sub> Se <sub>2</sub>  | 326  | 413.50  | 702.00    | 0.634  | 0.062 |
| Cu <sub>2</sub> Sn <sub>0.8</sub> Zn <sub>0.2</sub> S <sub>3</sub>                         | 623  | 95.40   | 81200.00  | 1.554  | 0.296 |
| Yb <sub>13.49</sub> Ce <sub>0.39</sub> Mn <sub>1.05</sub> Sb <sub>11.08</sub>              | 300  | 40.00   | 43723.00  | 0.769  | 0.027 |
| Zn <sub>0.9</sub> Cd <sub>0.1</sub> Sc <sub>0.03</sub> O <sub>1.045</sub>                  | 373  | -83.20  | 52600.00  | 6.600  | 0.021 |
| K <sub>0.975</sub> Ba <sub>0.025</sub> GaSb <sub>4</sub>                                   | 416  | -176.87 | 24338.00  | 0.977  | 0.324 |
| Ag <sub>0.97</sub> Cr <sub>0.97</sub> Bi <sub>0.03</sub> Se <sub>2</sub>                   | 403  | 85.38   | 18008.00  | 0.430  | 0.123 |
| FeNb <sub>0.88</sub> Hf <sub>0.12</sub> Sb                                                 | 700  | 179.70  | 192250.00 | 5.186  | 0.845 |
| CoGeTe                                                                                     | 776  | -79.15  | 14894.00  | 6.038  | 0.012 |
| Ge <sub>4</sub> Sb <sub>2</sub> Te <sub>7</sub>                                            | 623  | 107.00  | 88335.00  | 1.785  | 0.357 |
| Pb <sub>0.975</sub> Zn <sub>0.04</sub> Te                                                  | 323  | -150.00 | 130530.00 | 2.753  | 0.345 |
| (SnTe) <sub>0.92</sub> (CuSbTe <sub>2</sub> ) <sub>0.08</sub>                              | 430  | 51.37   | 259589.00 | 3.788  | 0.078 |
| GeTe                                                                                       | 298  | 27.10   | 741237.00 | 8.043  | 0.020 |

|                                                                                            |     |         |           |       |       |
|--------------------------------------------------------------------------------------------|-----|---------|-----------|-------|-------|
| Bi <sub>0.92</sub> Ag <sub>0.08</sub> CuSeO                                                | 523 | 255.00  | 1880.00   | 0.440 | 0.145 |
| In <sub>4</sub> Pb <sub>0.01</sub> Sn <sub>0.03</sub> Se <sub>2.9</sub> Cl <sub>0.06</sub> | 523 | -233.00 | 8910.00   | 0.666 | 0.390 |
| CasIn <sub>1.9</sub> Zn <sub>0.1</sub> Sb <sub>6</sub>                                     | 522 | 162.00  | 20860.00  | 1.008 | 0.273 |
| Mn <sub>2</sub> Cu <sub>3</sub> In <sub>3</sub> Te <sub>8</sub>                            | 675 | 415.00  | 565.00    | 0.895 | 0.073 |
| (Cu <sub>0.003</sub> Pb <sub>0.997</sub> Te)(MnTe) <sub>0.03</sub>                         | 323 | -225.44 | 56000.00  | 1.771 | 0.519 |
| Mg <sub>3.5</sub> Ho <sub>0.01</sub> Sb <sub>2</sub>                                       | 300 | -199.30 | 2217.00   | 1.118 | 0.024 |
| Tl <sub>0.22</sub> Co <sub>4</sub> Sb <sub>12</sub>                                        | 50  | -23.30  | 306060.00 | 2.903 | 0.003 |
| Cu <sub>2</sub> Se <sub>0.9</sub> S <sub>0.1</sub>                                         | 426 | 57.92   | 66000.00  | 0.635 | 0.149 |
| Bi <sub>0.9</sub> Ag <sub>0.1</sub> CuSeO                                                  | 873 | 336.00  | 2600.00   | 0.425 | 0.603 |
| Cu <sub>5</sub> Sn <sub>2</sub> Se <sub>7</sub>                                            | 598 | 44.20   | 302200.00 | 3.856 | 0.092 |
| (SnTe) <sub>0.84</sub> (CuSbTe <sub>2</sub> ) <sub>0.16</sub>                              | 529 | 73.90   | 196271.00 | 3.056 | 0.186 |
| ZrNiSn <sub>0.99</sub> Sb <sub>0.01</sub>                                                  | 309 | -129.20 | 160460.00 | 7.350 | 0.100 |
| Mg <sub>3.5</sub> Ho <sub>0.04</sub> Sb <sub>2</sub>                                       | 400 | -226.10 | 18673.00  | 1.139 | 0.335 |
| Sn <sub>0.87</sub> Mn <sub>0.1</sub> Bi <sub>0.03</sub> Te                                 | 423 | 72.00   | 218000.00 | 4.000 | 0.120 |
| Cu <sub>5</sub> Sn <sub>2</sub> S <sub>6.65</sub> Cl <sub>0.35</sub>                       | 415 | 58.24   | 143949.00 | 2.400 | 0.084 |
| Sn <sub>0.97</sub> Mn <sub>0.03</sub> Te                                                   | 772 | 138.10  | 121893.00 | 3.053 | 0.588 |
| Sn <sub>0.8</sub> Ge <sub>0.2</sub> Te                                                     | 573 | 67.60   | 256000.00 | 4.367 | 0.153 |
| Sn <sub>0.8</sub> Ge <sub>0.2</sub> Te                                                     | 673 | 85.80   | 203850.00 | 3.663 | 0.276 |
| Eu <sub>2</sub> ZnSb <sub>2</sub>                                                          | 300 | 250.00  | 3231.00   | 0.430 | 0.141 |
| Ba <sub>8</sub> Ga <sub>15.88</sub> Zn <sub>0.007</sub> Sn <sub>30.12</sub>                | 500 | 400.00  | 12310.00  | 0.919 | 1.072 |
| (Sn <sub>0.985</sub> In <sub>0.015</sub> Te) <sub>0.85</sub> (AgCl) <sub>0.15</sub>        | 323 | 58.53   | 420225.00 | 4.000 | 0.116 |
| K <sub>0.99</sub> Ba <sub>0.01</sub> GaSb <sub>4</sub>                                     | 324 | -143.20 | 11614.00  | 1.120 | 0.069 |
| Sn <sub>1.03</sub> Te                                                                      | 723 | 126.90  | 98200.00  | 3.704 | 0.309 |
| Sn <sub>0.99</sub> Mn <sub>0.01</sub> Te                                                   | 524 | 48.44   | 383432.00 | 6.342 | 0.074 |
| Ba <sub>8.02</sub> Cu <sub>4.98</sub> Si <sub>35</sub> Ge <sub>5.99</sub>                  | 466 | -65.30  | 121200.00 | 2.190 | 0.110 |
| Ag <sub>2</sub> Se <sub>1.03</sub>                                                         | 362 | -137.23 | 131311.00 | 1.166 | 0.768 |
| (SnTe) <sub>12</sub> Sb <sub>2</sub> Te <sub>3</sub>                                       | 323 | 64.14   | 224000.00 | 2.910 | 0.102 |
| Rb <sub>2</sub> Bi <sub>8</sub> Se <sub>13</sub>                                           | 724 | -237.00 | 1403.00   | 0.480 | 0.119 |
| Cu <sub>2.9</sub> Ag <sub>0.1</sub> ErTe <sub>3</sub>                                      | 400 | 50.00   | 221778.00 | 2.240 | 0.099 |
| TiZr <sub>0.025</sub> NiSn                                                                 | 526 | -191.20 | 54620.00  | 2.678 | 0.409 |
| NbCo <sub>0.9</sub> Ni <sub>0.1</sub> Sn                                                   | 703 | -184.71 | 68571.00  | 6.691 | 0.246 |
| (CuI) <sub>0.003</sub> Bi <sub>2</sub> Te <sub>3</sub>                                     | 420 | -170.86 | 93431.00  | 1.385 | 0.827 |
| In <sub>3.95</sub> Pb <sub>0.05</sub> Se <sub>3</sub>                                      | 330 | -207.00 | 5150.00   | 1.055 | 0.069 |
| Cu <sub>3.0</sub> SbSe <sub>4</sub>                                                        | 623 | 330.00  | 7471.00   | 1.020 | 0.497 |
| Cu <sub>2</sub> ZnSnSe <sub>4</sub>                                                        | 323 | 105.92  | 21008.00  | 4.567 | 0.017 |
| BiSb(Se <sub>0.98</sub> Br <sub>0.02</sub> ) <sub>3</sub>                                  | 500 | -173.00 | 16702.00  | 0.580 | 0.420 |
| Cu <sub>2.1</sub> Se                                                                       | 295 | 51.00   | 260830.00 | 1.688 | 0.119 |
| In <sub>0.005</sub> Pb <sub>0.995</sub> Te <sub>0.994</sub> I <sub>0.006</sub>             | 585 | -162.00 | 49048.00  | 1.494 | 0.504 |
| Cu <sub>2</sub> Zn <sub>0.8</sub> Fe <sub>0.2</sub> SnSe <sub>4</sub>                      | 573 | 365.32  | 725.89    | 1.039 | 0.053 |
| Ag <sub>0.02</sub> Cr <sub>1.98</sub> Se <sub>3</sub>                                      | 300 | 85.43   | 37643.00  | 1.558 | 0.053 |
| Sb <sub>0.1</sub> Ge <sub>0.9</sub> Te                                                     | 373 | 171.20  | 55050.00  | 1.581 | 0.384 |

|                                                                                             |     |         |           |       |       |
|---------------------------------------------------------------------------------------------|-----|---------|-----------|-------|-------|
| Mg <sub>2</sub> Sn <sub>0.98</sub> Sb <sub>0.02</sub>                                       | 544 | -117.30 | 304464.00 | 5.170 | 0.441 |
| Yb <sub>13.49</sub> Ce <sub>0.39</sub> Mn <sub>1.05</sub> Sb <sub>11.08</sub>               | 673 | 149.38  | 22616.00  | 0.734 | 0.463 |
| Cu <sub>7</sub> P(S <sub>0.75</sub> Se <sub>0.25</sub> ) <sub>6</sub>                       | 673 | 313.61  | 1667.00   | 0.216 | 0.512 |
| Cu <sub>2.5</sub> Sn <sub>0.5</sub> Sb <sub>0.5</sub> Se <sub>3.5</sub>                     | 300 | 28.00   | 532716.00 | 5.310 | 0.024 |
| Nb <sub>0.75</sub> Ta <sub>0.25</sub> CoSn <sub>0.9</sub> Sb <sub>0.1</sub>                 | 728 | -160.95 | 87234.00  | 3.906 | 0.421 |
| Ba <sub>8.07</sub> Cu <sub>4.89</sub> Si <sub>41.03</sub>                                   | 517 | -66.00  | 136190.00 | 2.700 | 0.114 |
| GeTe                                                                                        | 398 | 36.45   | 538144.00 | 6.727 | 0.042 |
| Sn <sub>1.03</sub> Se <sub>0.12</sub> Te <sub>0.865</sub> Br <sub>0.015</sub>               | 523 | 56.00   | 243860.00 | 3.100 | 0.142 |
| In <sub>0.005</sub> Pb <sub>0.995</sub> Te <sub>0.996</sub> l <sub>0.004</sub>              | 637 | -207.42 | 28900.00  | 1.434 | 0.543 |
| NbCoSn                                                                                      | 972 | -284.90 | 16020.00  | 4.360 | 0.260 |
| Ce <sub>0.2</sub> Bi <sub>1.8</sub> Te <sub>3</sub>                                         | 458 | -152.58 | 67400.00  | 0.566 | 1.242 |
| Pb <sub>0.98</sub> Zn <sub>0.035</sub> Te                                                   | 419 | -208.90 | 59400.00  | 1.908 | 0.565 |
| Ca <sub>1.11</sub> Yb <sub>3.89</sub> Al <sub>2</sub> Sb <sub>5.77</sub> Ge <sub>0.23</sub> | 567 | 56.13   | 21402.00  | 1.963 | 0.019 |
| BiSbSe <sub>2.76</sub> Cl <sub>0.24</sub>                                                   | 500 | -192.00 | 8730.00   | 0.490 | 0.328 |
| Ba <sub>0.11</sub> Yb <sub>0.03</sub> Co <sub>4</sub> Sb <sub>12.07</sub>                   | 800 | -179    | 110000.00 | 1.300 | 0.900 |
| Ag <sub>0.97</sub> CuSe                                                                     | 479 | 190.44  | 14569.00  | 0.632 | 0.400 |
| Sn <sub>0.91</sub> Mn <sub>0.09</sub> Te <sub>0.97</sub> l <sub>0.03</sub>                  | 331 | 56.70   | 233846.00 | 3.527 | 0.071 |
| GeSe                                                                                        | 772 | 522.06  | 400.00    | 0.762 | 0.110 |
| Tl <sub>9.0</sub> Bi <sub>0.97</sub> Te <sub>6.0</sub>                                      | 385 | 173.60  | 27100.00  | 0.500 | 0.629 |
| (CaZn <sub>0.4</sub> Ag <sub>0.2</sub> Sb) <sub>0.87</sub> (LiZnSb) <sub>0.13</sub>         | 573 | 170.15  | 26694.00  | 0.554 | 0.799 |
| Ca <sub>5</sub> In <sub>1.98</sub> Zn <sub>0.02</sub> Sb <sub>6</sub>                       | 922 | 238.55  | 5349.00   | 0.698 | 0.402 |
| GeSe <sub>0.7</sub> Te <sub>0.3</sub>                                                       | 776 | 119.70  | 70149.00  | 1.316 | 0.593 |
| CuGa <sub>0.99</sub> Mn <sub>0.01</sub> Te <sub>2</sub>                                     | 425 | 356.50  | 5000.00   | 3.460 | 0.078 |
| AgBi <sub>0.96</sub> Pb <sub>0.04</sub> Se <sub>2.12</sub>                                  | 300 | 377.30  | 1560.00   | 0.548 | 0.122 |
| Ge <sub>0.6</sub> Sb <sub>0.2</sub> Te <sub>0.8</sub> (AgSnSe <sub>2</sub> ) <sub>0.2</sub> | 723 | 175.78  | 55484.00  | 0.930 | 1.369 |
| (SnTe) <sub>0.84</sub> (CuSbTe <sub>2</sub> ) <sub>0.16</sub>                               | 432 | 51.92   | 259589.00 | 3.789 | 0.080 |
| Ag <sub>0.01</sub> Sn <sub>0.99</sub> Se <sub>0.85</sub> S <sub>0.15</sub>                  | 666 | 409.83  | 710.00    | 0.136 | 0.586 |
| Mg <sub>1.96</sub> Li <sub>0.04</sub> Zn <sub>0.98</sub> Sb <sub>2</sub>                    | 673 | 104.76  | 70053.00  | 1.122 | 0.461 |
| Ba <sub>1.6</sub> Bi <sub>0.4</sub> CoRuO <sub>6</sub>                                      | 318 | 157.20  | 12500.00  | 1.324 | 0.074 |
| Cu <sub>0.9</sub> Pd <sub>0.1</sub> FeS <sub>2</sub>                                        | 300 | -168.00 | 27384.00  | 5.227 | 0.044 |
| Ti <sub>0.925</sub> Mn <sub>0.075</sub> NiSn <sub>0.925</sub> Sb <sub>0.075</sub>           | 797 | -120.00 | 200000.00 | 5.899 | 0.389 |
| Ag(Bi <sub>0.8</sub> Nb <sub>0.2</sub> ) <sub>0.9</sub> Sb <sub>0.1</sub> Se <sub>2</sub>   | 526 | -170.00 | 14107.00  | 0.529 | 0.405 |
| Cu <sub>1.925</sub> Ag <sub>0.075</sub> SnSe <sub>3</sub>                                   | 400 | 113.13  | 10727.00  | 1.092 | 0.050 |
| Sn <sub>0.985</sub> In <sub>0.015</sub> Te                                                  | 623 | 90.72   | 246067.00 | 4.292 | 0.294 |
| Sr <sub>14.5</sub> Ga <sub>29.2</sub> Ge <sub>56.3</sub>                                    | 564 | -143.52 | 59949.00  | 1.800 | 0.387 |
| CsPr <sub>2</sub> Ag <sub>3</sub> Te <sub>5</sub>                                           | 298 | -49.08  | 52.94     | 0.647 | 0.000 |
| TlCr <sub>5</sub> Se <sub>8</sub>                                                           | 423 | 247.40  | 5878.00   | 0.706 | 0.216 |
| Ba <sub>1.6</sub> Bi <sub>0.4</sub> CoRuO <sub>6</sub>                                      | 418 | 74.00   | 37870.00  | 1.279 | 0.068 |
| CoGeTe                                                                                      | 327 | -176.00 | 5850.00   | 8.295 | 0.007 |
| Ba <sub>8.03</sub> Cu <sub>5</sub> Ge <sub>40.97</sub>                                      | 415 | -113.73 | 45700.00  | 1.320 | 0.186 |
| Mg <sub>2</sub> Zn <sub>1.04</sub> Sb <sub>2</sub>                                          | 773 | 121.80  | 8709.00   | 0.883 | 0.113 |

|                                                                                                          |     |         |           |        |       |
|----------------------------------------------------------------------------------------------------------|-----|---------|-----------|--------|-------|
| (Sn <sub>0.8</sub> Ge <sub>0.2</sub> ) <sub>0.88</sub> Mn <sub>0.12</sub> Te                             | 373 | 60.90   | 204200.00 | 2.486  | 0.114 |
| Ag <sub>8</sub> Sn <sub>0.6</sub> Ga <sub>0.4</sub> Se <sub>6</sub>                                      | 330 | -559.35 | 70.00     | 0.210  | 0.052 |
| ZnSc <sub>0.02</sub> O <sub>1.03</sub>                                                                   | 673 | -230.00 | 5714.00   | 15.083 | 0.013 |
| Cu <sub>10.5</sub> Ni <sub>0.5</sub> ZnSb <sub>4</sub> S <sub>13</sub>                                   | 617 | 221.00  | 10590.00  | 0.501  | 0.637 |
| Zn <sub>0.9</sub> Cd <sub>0.1</sub> Sc <sub>0.02</sub> O <sub>1.03</sub>                                 | 773 | -119.40 | 39430.00  | 3.830  | 0.113 |
| Zn <sub>0.9</sub> Cd <sub>0.1</sub> Sc <sub>0.04</sub> O <sub>1.06</sub>                                 | 473 | -102.00 | 41146.00  | 5.700  | 0.036 |
| (SnTe) <sub>15</sub> Sb <sub>2</sub> Te <sub>3</sub>                                                     | 773 | 161.54  | 90380.00  | 2.130  | 0.856 |
| Cu <sub>2</sub> ZnSnSe <sub>4</sub>                                                                      | 573 | 165.43  | 15060.00  | 3.298  | 0.072 |
| Li <sub>2</sub> Ge <sub>3</sub> Sb <sub>2</sub> Te <sub>7</sub>                                          | 523 | 246.60  | 26650.00  | 0.782  | 1.070 |
| Tl <sub>8.98</sub> Sb <sub>1.02</sub> Te <sub>6</sub>                                                    | 503 | 192.00  | 22400.00  | 0.460  | 0.906 |
| Hf <sub>0.8</sub> Ti <sub>0.2</sub> CoSb <sub>0.8</sub> Sn <sub>0.2</sub>                                | 305 | 158.00  | 61600.00  | 2.764  | 0.170 |
| BiSb(Se <sub>0.98</sub> Br <sub>0.02</sub> ) <sub>3</sub>                                                | 600 | -190.00 | 15000.00  | 0.560  | 0.580 |
| Ag <sub>3</sub> RbMo <sub>9</sub> Se <sub>11</sub>                                                       | 324 | 71.15   | 4267.00   | 0.681  | 0.010 |
| BiSbSe <sub>2.76</sub> Cl <sub>0.24</sub>                                                                | 400 | -159.00 | 11050.00  | 0.540  | 0.207 |
| Ag <sub>2.0</sub> Se <sub>0.6</sub> Te <sub>0.4</sub>                                                    | 375 | -115.00 | 78990.00  | 0.752  | 0.521 |
| Sr <sub>15</sub> Ga <sub>29.5</sub> Ge <sub>55.6</sub>                                                   | 774 | -193.00 | 21700.00  | 1.555  | 0.402 |
| BaGd <sub>2</sub> NiO <sub>5</sub>                                                                       | 975 | 453.68  | 29.12     | 1.498  | 0.004 |
| LaCo <sub>0.9</sub> (Ni <sub>0.5</sub> Fe <sub>0.5</sub> ) <sub>0.1</sub> O <sub>3</sub>                 | 300 | 327.50  | 828.60    | 0.480  | 0.056 |
| Ge <sub>12</sub> Sb <sub>2</sub> Te <sub>15</sub>                                                        | 573 | 236.00  | 42150.00  | 1.504  | 0.900 |
| CuGa <sub>0.98</sub> Mn <sub>0.02</sub> Te <sub>2</sub>                                                  | 475 | 292.40  | 9342.00   | 3.957  | 0.096 |
| Al <sub>0.005</sub> Sb <sub>0.1</sub> Ge <sub>0.895</sub> Te                                             | 673 | 247.60  | 57030.00  | 1.470  | 1.601 |
| Ag <sub>1.3</sub> Sb <sub>0.9</sub> Pb <sub>15.7</sub> Te <sub>22.0</sub>                                | 473 | -99.20  | 733.00    | 0.993  | 0.003 |
| Hf <sub>0.9</sub> Ti <sub>0.1</sub> CoSb <sub>0.8</sub> Sn <sub>0.2</sub>                                | 377 | 158.28  | 74752.00  | 3.390  | 0.207 |
| SnSe <sub>0.8</sub> S <sub>0.2</sub>                                                                     | 673 | 365.41  | 2727.00   | 0.710  | 0.345 |
| AgBi <sub>0.9</sub> Sb <sub>0.1</sub> Se <sub>2</sub>                                                    | 478 | -152.78 | 20535.00  | 0.475  | 0.483 |
| (Zn <sub>0.9</sub> In <sub>0.1</sub> ) <sub>4</sub> Sb <sub>3</sub>                                      | 373 | 175.00  | 13095.00  | 0.835  | 0.179 |
| Mg <sub>2</sub> Cu <sub>3</sub> In <sub>3</sub> Te <sub>8</sub>                                          | 668 | 279.30  | 6690.00   | 1.372  | 0.254 |
| Ba <sub>8</sub> Cu <sub>5.04</sub> Si <sub>13.01</sub> Ge <sub>27.96</sub>                               | 811 | -124.20 | 49200.00  | 1.810  | 0.340 |
| Mg <sub>3.07</sub> Sb <sub>1.5</sub> Bi <sub>0.45</sub> Se <sub>0.05</sub>                               | 400 | -293.90 | 8507.00   | 0.796  | 0.369 |
| Ag <sub>0.8</sub> Sb <sub>0.8</sub> Pb <sub>18.3</sub> Te <sub>20.0</sub>                                | 673 | -242.00 | 19116.00  | 0.701  | 1.075 |
| (Cu <sub>3</sub> SnS <sub>4</sub> ) <sub>0.915</sub> (Ga <sub>2</sub> Te <sub>3</sub> ) <sub>0.085</sub> | 741 | 120.00  | 84000.00  | 1.980  | 0.453 |
| Ca <sub>5</sub> Ga <sub>2</sub> Sb <sub>6</sub>                                                          | 624 | 112.70  | 1466.00   | 1.032  | 0.010 |
| Ag <sub>2</sub> Mo <sub>6</sub> Te <sub>8</sub>                                                          | 800 | 24.56   | 182699.00 | 4.208  | 0.021 |
| Ba <sub>8</sub> Cu <sub>5.18</sub> Si <sub>9.98</sub> Ge <sub>30.85</sub>                                | 613 | -126.00 | 52780.00  | 1.700  | 0.302 |
| Bi <sub>0.88</sub> Pb <sub>0.06</sub> Yb <sub>0.06</sub> CuSeO                                           | 741 | 192.00  | 15865.00  | 0.427  | 1.015 |
| Ta <sub>0.84</sub> Ti <sub>0.16</sub> FeSb                                                               | 470 | 142.00  | 258200.00 | 4.740  | 0.516 |
| In <sub>4</sub> Pb <sub>0.01</sub> Sn <sub>0.03</sub> Se <sub>2.9</sub> Cl <sub>0.04</sub>               | 673 | -261.50 | 13762.00  | 0.554  | 1.143 |
| TiZr <sub>0.025</sub> NiSn                                                                               | 736 | -186.56 | 74462.00  | 2.989  | 0.645 |
| CsTb <sub>2</sub> Ag <sub>3</sub> Te <sub>5</sub>                                                        | 462 | 115.60  | 281.50    | 0.405  | 0.004 |
| Ba <sub>1.9</sub> Bi <sub>0.1</sub> CoRuO <sub>6</sub>                                                   | 518 | 20.33   | 184500.00 | 1.367  | 0.029 |
| La <sub>0.3</sub> Co <sub>4</sub> Sb <sub>12</sub>                                                       | 473 | 80.30   | 26565.00  | 3.530  | 0.023 |

|                                                                                             |      |         |           |        |       |
|---------------------------------------------------------------------------------------------|------|---------|-----------|--------|-------|
| SnS                                                                                         | 423  | 256.40  | 38149.00  | 2.155  | 0.492 |
| Zn <sub>0.9</sub> Cd <sub>0.1</sub> Sc <sub>0.006</sub> O <sub>1.009</sub>                  | 1073 | -148.00 | 27710.00  | 3.200  | 0.204 |
| Co <sub>0.97</sub> Ni <sub>0.03</sub> GeTe                                                  | 327  | -81.28  | 90957.00  | 6.333  | 0.031 |
| Ag(Bi <sub>0.85</sub> Nb <sub>0.15</sub> ) <sub>0.7</sub> Sb <sub>0.3</sub> Se <sub>2</sub> | 676  | -228.00 | 7079.00   | 0.937  | 0.265 |
| (PbTe) <sub>0.15</sub> (Ag <sub>2</sub> Te) <sub>0.85</sub>                                 | 500  | -160.50 | 30700.00  | 0.543  | 0.726 |
| BiCuSeO                                                                                     | 839  | 256.91  | 2783.00   | 0.380  | 0.406 |
| Ag(Bi <sub>0.85</sub> Pb <sub>0.15</sub> ) <sub>0.9</sub> Sb <sub>0.1</sub> Se <sub>2</sub> | 326  | 430.56  | 197.18    | 0.507  | 0.024 |
| Ti <sub>0.98</sub> Al <sub>0.02</sub> O <sub>2</sub>                                        | 296  | -376.00 | 1990.00   | 5.875  | 0.014 |
| FeNb <sub>0.92</sub> Zr <sub>0.08</sub> Sb                                                  | 300  | 122.82  | 330233.00 | 13.270 | 0.113 |
| Cu <sub>2</sub> Se <sub>0.96</sub> S <sub>0.04</sub>                                        | 353  | 104.28  | 91758.00  | 0.712  | 0.495 |
| Bi <sub>0.9</sub> Pb <sub>0.1</sub> CuSeO                                                   | 50   | 26.29   | 246463.00 | 2.038  | 0.004 |
| Tl <sub>4</sub> PbTe <sub>3</sub>                                                           | 373  | 46.53   | 53500.00  | 1.025  | 0.042 |
| Ge <sub>0.98</sub> Mn <sub>0.01</sub> Sb <sub>0.01</sub> Te                                 | 698  | 147.42  | 143299.00 | 2.150  | 1.011 |
| Ge <sub>0.83</sub> In <sub>0.05</sub> Pb <sub>0.12</sub> Te                                 | 550  | 235.63  | 26995.00  | 1.087  | 0.787 |
| Yb <sub>13.43</sub> Ce <sub>0.44</sub> Mn <sub>1.07</sub> Sb <sub>11.07</sub>               | 1173 | 238.40  | 12520.00  | 0.688  | 1.213 |
| Ag <sub>0.9</sub> Sb <sub>0.9</sub> Pb <sub>18.3</sub> Te <sub>19.9</sub>                   | 423  | -360.00 | 3168.00   | 0.955  | 0.182 |
| Ag <sub>0.01</sub> Sn <sub>0.99</sub> Se                                                    | 322  | 296.15  | 1547.00   | 0.532  | 0.082 |
| Cu <sub>10.5</sub> NiZn <sub>0.5</sub> Sb <sub>4</sub> S <sub>13</sub>                      | 323  | 160.00  | 14530.00  | 0.500  | 0.240 |
| Yb <sub>13.43</sub> Ce <sub>0.44</sub> Mn <sub>1.07</sub> Sb <sub>11.07</sub>               | 1073 | 232.10  | 12500.00  | 0.629  | 1.149 |
| Ag <sub>0.01</sub> Sn <sub>0.99</sub> Se <sub>0.8</sub> S <sub>0.2</sub>                    | 567  | 433.33  | 432.00    | 0.159  | 0.289 |
| In <sub>4</sub> Pb <sub>0.01</sub> Sn <sub>0.03</sub> Se <sub>2.9</sub> Cl <sub>0.06</sub>  | 373  | 219.00  | 3820.00   | 0.844  | 0.081 |
| Ag <sub>2</sub> Se <sub>1.03</sub>                                                          | 377  | -135.32 | 136800.00 | 1.174  | 0.804 |
| (SnTe) <sub>12</sub> Sb <sub>2</sub> Te <sub>3</sub>                                        | 423  | 84.83   | 181125.00 | 2.700  | 0.204 |
| Cu <sub>26</sub> V <sub>2</sub> Ge <sub>6</sub> S <sub>32</sub>                             | 674  | 79.00   | 191500.00 | 3.011  | 0.268 |
| Ti <sub>0.95</sub> Mn <sub>0.05</sub> NiSn <sub>0.95</sub> Sb <sub>0.05</sub>               | 398  | -108.32 | 237748.00 | 6.328  | 0.175 |
| CaZn <sub>0.4</sub> Ag <sub>0.2</sub> Sb                                                    | 873  | 137.91  | 36932.00  | 1.022  | 0.600 |
| Cu <sub>2</sub> Zn <sub>0.2</sub> Fe <sub>0.8</sub> SnSe <sub>4</sub>                       | 473  | 238.15  | 2835.00   | 1.276  | 0.060 |
| TiNiSn                                                                                      | 424  | -114.42 | 69767.00  | 4.103  | 0.105 |
| Co <sub>0.95</sub> Ni <sub>0.05</sub> GeTe                                                  | 776  | -96.38  | 120370.00 | 5.038  | 0.172 |
| Ca <sub>11</sub> Sb <sub>10</sub>                                                           | 513  | 16.00   | 2060.00   | 0.922  | 0.000 |
| AgCuTe <sub>0.6</sub> Se <sub>0.4</sub>                                                     | 522  | 245.83  | 8155.00   | 0.379  | 0.679 |
| EuCd <sub>2</sub> Sb <sub>2</sub>                                                           | 650  | 274.40  | 10216.00  | 0.740  | 0.676 |
| Ca <sub>0.05</sub> BaGd <sub>1.95</sub> NiO <sub>5</sub>                                    | 1230 | 285.29  | 130.54    | 1.281  | 0.010 |
| Bi <sub>0.92</sub> Ag <sub>0.08</sub> CuSeO                                                 | 773  | 335.50  | 2325.00   | 0.404  | 0.501 |
| AgCuTe <sub>0.6</sub> Se <sub>0.4</sub>                                                     | 723  | 258.10  | 6699.00   | 0.643  | 0.495 |
| Mg <sub>2</sub> Sn <sub>0.995</sub> Sb <sub>0.005</sub>                                     | 350  | -148.10 | 195614.00 | 5.107  | 0.294 |
| Ca <sub>5</sub> Ga <sub>1.8</sub> Zn <sub>0.2</sub> Sb <sub>6</sub>                         | 425  | 72.30   | 47700.00  | 1.640  | 0.065 |
| Li <sub>0.01</sub> Cu <sub>1.85</sub> Se                                                    | 784  | 74.34   | 187500.00 | 3.386  | 0.240 |
| Li <sub>0.03</sub> Cu <sub>1.85</sub> Se                                                    | 502  | 37.92   | 281731.00 | 2.605  | 0.078 |
| Cu <sub>2</sub> Se <sub>0.94</sub> S <sub>0.06</sub>                                        | 353  | 111.84  | 87895.00  | 0.654  | 0.593 |
| Ag <sub>0.97</sub> Cr <sub>0.99</sub> Sb <sub>0.01</sub> Se <sub>2</sub>                    | 703  | 167.74  | 10240.00  | 0.457  | 0.443 |

|                                                                                                                     |      |         |           |        |       |
|---------------------------------------------------------------------------------------------------------------------|------|---------|-----------|--------|-------|
| Cu <sub>2</sub> Se <sub>0.5</sub> S <sub>0.5</sub>                                                                  | 769  | 131.19  | 53429.00  | 0.773  | 0.915 |
| Ag <sub>8</sub> Sn <sub>0.4</sub> Ga <sub>0.6</sub> Se <sub>6</sub>                                                 | 710  | -151.40 | 18020.00  | 0.289  | 1.015 |
| Ag <sub>0.97</sub> Cr <sub>0.99</sub> Sb <sub>0.01</sub> Se <sub>2</sub>                                            | 503  | 111.23  | 15016.00  | 0.507  | 0.184 |
| FeNb <sub>0.92</sub> Hf <sub>0.08</sub> Sb                                                                          | 400  | 145.40  | 276400.00 | 7.860  | 0.297 |
| La <sub>0.1</sub> Ca <sub>0.9</sub> TiO <sub>3</sub>                                                                | 640  | -145.80 | 19900.00  | 3.238  | 0.084 |
| Cu <sub>26</sub> Ti <sub>2</sub> Sb <sub>3</sub> Ge <sub>3</sub> S <sub>32</sub>                                    | 400  | 85.05   | 139024.00 | 1.861  | 0.216 |
| Al <sub>0.01</sub> Sb <sub>0.1</sub> Ge <sub>0.89</sub> Te                                                          | 673  | 268.01  | 54165.00  | 1.396  | 1.774 |
| Ca <sub>0.25</sub> BaGd <sub>1.75</sub> NiO <sub>5</sub>                                                            | 791  | 146.32  | 295.36    | 1.351  | 0.004 |
| Tl <sub>0.7</sub> Co <sub>4</sub> Sn <sub>0.75</sub> Sb <sub>11.25</sub>                                            | 150  | -31.76  | 46977.00  | 2.333  | 0.003 |
| K <sub>8</sub> Ga <sub>8</sub> Ge <sub>38</sub>                                                                     | 50   | 0.30    | 231.01    | 1.006  | 0.000 |
| Ge <sub>0.9</sub> Mn <sub>0.05</sub> Sb <sub>0.05</sub> Te                                                          | 498  | 133.23  | 100000.00 | 2.086  | 0.424 |
| AgSb <sub>0.99</sub> Mn <sub>0.01</sub> Te <sub>2</sub>                                                             | 493  | 140.00  | 38667.00  | 0.920  | 0.406 |
| Ta <sub>0.88</sub> Ti <sub>0.12</sub> FeSb                                                                          | 570  | 172.00  | 185933.00 | 4.604  | 0.681 |
| Ca <sub>0.2</sub> BaGd <sub>1.8</sub> NiO <sub>5</sub>                                                              | 1275 | 205.88  | 483.12    | 1.634  | 0.016 |
| Cu <sub>26</sub> V <sub>2</sub> Ge <sub>6</sub> S <sub>32</sub>                                                     | 400  | 32.57   | 389286.00 | 4.427  | 0.037 |
| Ti <sub>0.97</sub> Mn <sub>0.03</sub> NiSn <sub>0.97</sub> Sb <sub>0.03</sub>                                       | 697  | -147.20 | 138500.00 | 5.400  | 0.387 |
| (Ag <sub>0.05</sub> Sb <sub>0.05</sub> Sn <sub>0.9</sub> )(S <sub>0.05</sub> Se <sub>0.05</sub> Te <sub>0.9</sub> ) | 823  | 146.53  | 95413.00  | 2.070  | 0.800 |
| (Cu <sub>3</sub> Sn <sub>4</sub> ) <sub>0.915</sub> (Ga <sub>2</sub> Te <sub>3</sub> ) <sub>0.085</sub>             | 798  | 183.00  | 27960.00  | 0.930  | 0.803 |
| Sn <sub>1.03</sub> Se <sub>0.12</sub> Te <sub>0.88</sub>                                                            | 423  | 26.62   | 369298.00 | 4.459  | 0.025 |
| Ta <sub>0.92</sub> Ti <sub>0.08</sub> FeSb                                                                          | 670  | 213.30  | 115950.00 | 4.708  | 0.752 |
| SnSe                                                                                                                | 523  | 371.00  | 336.00    | 0.600  | 0.040 |
| NbCo <sub>0.96</sub> Ni <sub>0.04</sub> Sn                                                                          | 382  | -119.41 | 112426.00 | 9.655  | 0.063 |
| Yb <sub>7</sub> Ca <sub>6</sub> BaMgSb <sub>11</sub>                                                                | 700  | 166.50  | 12100.00  | 0.595  | 0.395 |
| Mg <sub>3.5</sub> Gd <sub>0.04</sub> Sb <sub>2</sub>                                                                | 300  | -220.36 | 15045.00  | 1.101  | 0.199 |
| Mg <sub>3.07</sub> Sb <sub>1.5</sub> Bi <sub>0.45</sub> Se <sub>0.05</sub>                                          | 700  | -306.30 | 10690.00  | 0.667  | 1.053 |
| Ge <sub>0.55</sub> Pb <sub>0.45</sub> Te <sub>0.5</sub> Se <sub>0.5</sub>                                           | 370  | 249.00  | 10000.00  | 0.600  | 0.400 |
| Sn <sub>0.93</sub> Pb <sub>0.06</sub> Zn <sub>0.01</sub> Se                                                         | 573  | 550.00  | 315.00    | 0.516  | 0.106 |
| Gd <sub>2.84</sub> Se <sub>4</sub>                                                                                  | 550  | -95.70  | 28734.00  | 1.272  | 0.114 |
| La <sub>0.1</sub> Co <sub>4</sub> Sb <sub>12</sub>                                                                  | 773  | 101.60  | 24867.00  | 4.500  | 0.044 |
| BiCuSeO                                                                                                             | 100  | 103.09  | 1.43      | 2.854  | 0.000 |
| Ti <sub>0.9</sub> Mn <sub>0.1</sub> NiSn <sub>0.9</sub> Sb <sub>0.1</sub>                                           | 871  | -131.89 | 205960.00 | 5.547  | 0.563 |
| Cu <sub>26</sub> V <sub>2</sub> Ge <sub>5</sub> Sb <sub>3</sub> S <sub>32</sub>                                     | 497  | 71.10   | 201887.00 | 2.780  | 0.182 |
| CsNd <sub>2</sub> Ag <sub>3</sub> Te <sub>5</sub>                                                                   | 462  | 135.78  | 195.60    | 0.349  | 0.005 |
| LiGe <sub>3.5</sub> Sb <sub>2</sub> Te <sub>7</sub>                                                                 | 573  | 252.00  | 35550.00  | 0.946  | 1.280 |
| Na <sub>0.13</sub> Co <sub>4</sub> Sb <sub>12</sub>                                                                 | 850  | -200    | 39000.00  | 2.600  | 0.400 |
| Cu <sub>3</sub> SbSe <sub>4</sub>                                                                                   | 723  | 244.60  | 7760.00   | 1.113  | 0.360 |
| Bi <sub>2.0</sub> S <sub>2.79</sub> Se <sub>0.21</sub>                                                              | 623  | -561.00 | 268.00    | 0.510  | 0.103 |
| In <sub>4</sub> Pb <sub>0.01</sub> Sn <sub>0.03</sub> Se <sub>2.9</sub> Cl <sub>0.06</sub>                          | 573  | -246.80 | 10100.00  | 0.614  | 0.574 |
| Ba <sub>8.07</sub> Cu <sub>4.89</sub> Si <sub>41.03</sub>                                                           | 466  | -60.00  | 143000.00 | 2.715  | 0.089 |
| SnTe                                                                                                                | 298  | 29.20   | 768116.00 | 6.500  | 0.040 |
| CoS <sub>2</sub>                                                                                                    | 250  | -36.97  | 759413.00 | 11.940 | 0.022 |

|                                                                                                          |     |         |           |       |       |
|----------------------------------------------------------------------------------------------------------|-----|---------|-----------|-------|-------|
| GeTe                                                                                                     | 498 | 56.45   | 368041.00 | 4.963 | 0.118 |
| Zn <sub>2</sub> Cu <sub>3</sub> In <sub>3</sub> Te <sub>8</sub>                                          | 473 | 169.00  | 16275.00  | 2.150 | 0.102 |
| Cu <sub>2.05</sub> Cd <sub>0.95</sub> SnSe <sub>4</sub>                                                  | 450 | 147.40  | 16236.00  | 1.394 | 0.114 |
| Ag <sub>2</sub> Te                                                                                       | 600 | -123.20 | 43100.00  | 0.630 | 0.623 |
| Sr <sub>14.8</sub> Ga <sub>28.6</sub> Ge <sub>56.6</sub>                                                 | 510 | -101.00 | 92545.00  | 2.160 | 0.223 |
| Mo <sub>3</sub> Sb <sub>7</sub> l <sub>0.75</sub>                                                        | 423 | 24.50   | 569400.00 | 5.556 | 0.026 |
| La <sub>0.25</sub> Ca <sub>0.75</sub> TiO <sub>3</sub>                                                   | 640 | -105.50 | 66500.00  | 3.070 | 0.154 |
| Ag <sub>8.0</sub> GeTe <sub>6.0</sub>                                                                    | 770 | -20.00  | 1111.00   | 0.300 | 0.001 |
| (Cu <sub>3</sub> SnS <sub>4</sub> ) <sub>0.895</sub> (Ga <sub>2</sub> Te <sub>3</sub> ) <sub>0.105</sub> | 798 | 180.80  | 29628.00  | 0.832 | 0.929 |
| Cu <sub>2.05</sub> Cd <sub>0.95</sub> SnSe <sub>4</sub>                                                  | 500 | 152.00  | 18427.00  | 1.150 | 0.185 |
| Ba <sub>8.07</sub> Cu <sub>4.89</sub> Si <sub>41.03</sub>                                                | 566 | -72.60  | 128829.00 | 2.685 | 0.143 |
| Sn <sub>1.03</sub> Se <sub>0.08</sub> Te <sub>0.92</sub>                                                 | 523 | 49.17   | 258772.00 | 4.384 | 0.075 |
| Ba <sub>8</sub> Cu <sub>5.04</sub> Si <sub>13.01</sub> Ge <sub>27.96</sub>                               | 566 | -106.00 | 65100.00  | 1.843 | 0.225 |
| Cu <sub>1.95</sub> S <sub>0.5</sub> Se <sub>0.5</sub>                                                    | 300 | 62.63   | 33861.00  | 0.613 | 0.065 |
| Mo <sub>3</sub> Sb <sub>7</sub>                                                                          | 723 | 39.17   | 425000.00 | 6.820 | 0.069 |
| Cu <sub>3</sub> ErTe <sub>3</sub>                                                                        | 500 | 56.20   | 216000.00 | 2.180 | 0.156 |
| (SnTe) <sub>12</sub> Sb <sub>2</sub> Te <sub>3</sub>                                                     | 673 | 156.70  | 93000.00  | 1.900 | 0.809 |
| Yb <sub>13.49</sub> Ce <sub>0.39</sub> Mn <sub>1.05</sub> Sb <sub>11.08</sub>                            | 473 | 98.40   | 33007.00  | 0.774 | 0.195 |
| Cu <sub>2.05</sub> Cd <sub>0.95</sub> SnSe <sub>4</sub>                                                  | 600 | 160.70  | 16910.00  | 0.835 | 0.314 |
| Rb <sub>2</sub> Bi <sub>8</sub> Se <sub>12.961</sub>                                                     | 526 | -241.00 | 6060.00   | 0.535 | 0.346 |
| Ca <sub>5</sub> In <sub>1.9</sub> Zn <sub>0.1</sub> Sb <sub>6</sub>                                      | 622 | 171.00  | 19940.00  | 0.922 | 0.379 |
| Sr <sub>0.21</sub> Co <sub>4</sub> Sb <sub>12.25</sub>                                                   | 350 | -136.00 | 217727.00 | 4.580 | 0.308 |
| La <sub>0.5</sub> Co <sub>4</sub> Sb <sub>12</sub>                                                       | 573 | 86.70   | 30700.00  | 2.310 | 0.057 |
| Yb <sub>14</sub> MgBi <sub>11</sub>                                                                      | 817 | 88.64   | 59592.00  | 1.728 | 0.221 |
| Cu <sub>2</sub> Zn <sub>0.6</sub> Fe <sub>0.4</sub> SnSe <sub>4</sub>                                    | 473 | 330.92  | 306.87    | 1.760 | 0.009 |
| (Sn <sub>0.985</sub> In <sub>0.015</sub> Te) <sub>0.95</sub> (AgCl) <sub>0.05</sub>                      | 423 | 63.21   | 478652.00 | 5.189 | 0.156 |
| Cu <sub>1.925</sub> Ag <sub>0.075</sub> SnSe <sub>3</sub>                                                | 700 | 165.15  | 8667.00   | 0.571 | 0.290 |
| (SnTe) <sub>0.84</sub> (CuSbTe <sub>2</sub> ) <sub>0.16</sub>                                            | 719 | 139.29  | 107240.00 | 2.087 | 0.717 |
| Ba <sub>8</sub> Cu <sub>5.04</sub> Si <sub>13.01</sub> Ge <sub>27.96</sub>                               | 763 | -124.78 | 50710.00  | 1.810 | 0.333 |
| LiCo <sub>0.85</sub> Ni <sub>0.15</sub> O <sub>2</sub>                                                   | 623 | 398.62  | 5.40      | 1.943 | 0.000 |
| Ag <sub>0.97</sub> CrSe <sub>2</sub>                                                                     | 503 | 118.43  | 14157.00  | 0.415 | 0.241 |
| In <sub>0.015</sub> Pb <sub>0.985</sub> Te <sub>0.996</sub> l <sub>0.004</sub>                           | 637 | -225.39 | 19800.00  | 1.262 | 0.510 |
| Sn <sub>0.97</sub> Pb <sub>0.01</sub> Cd <sub>0.025</sub> Se                                             | 300 | 314.24  | 2095.00   | 1.130 | 0.055 |
| SnS                                                                                                      | 700 | 620.00  | 80.00     | 0.754 | 0.029 |
| (Cu <sub>0.003</sub> Pb <sub>0.997</sub> Te)(MnTe) <sub>0.03</sub>                                       | 773 | -182.98 | 53517.00  | 1.331 | 1.041 |
| Cu <sub>3</sub> Sb <sub>0.998</sub> In <sub>0.002</sub> Se <sub>4</sub>                                  | 473 | 324.50  | 5200.00   | 1.376 | 0.188 |
| ZrNiPb <sub>0.993</sub> Bi <sub>0.007</sub>                                                              | 871 | -180.41 | 100900.00 | 6.826 | 0.419 |
| In <sub>4</sub> Pb <sub>0.01</sub> Sn <sub>0.03</sub> Se <sub>2.9</sub> Cl <sub>0.02</sub>               | 523 | -231.10 | 16660.00  | 0.692 | 0.680 |
| Bi <sub>0.48</sub> Sb <sub>1.52</sub> Te <sub>3</sub>                                                    | 450 | 211.82  | 37584.00  | 1.720 | 0.441 |
| Nb <sub>0.85</sub> Ta <sub>0.15</sub> CoSn <sub>0.9</sub> Sb <sub>0.1</sub>                              | 530 | -130.29 | 111915.00 | 4.696 | 0.214 |
| Cu <sub>2</sub> Se                                                                                       | 650 | 152.30  | 49118.00  | 1.064 | 0.696 |



|                                                                                |     |         |           |       |       |
|--------------------------------------------------------------------------------|-----|---------|-----------|-------|-------|
| BiSbSe <sub>2.82</sub> Cl <sub>0.18</sub>                                      | 600 | -212.00 | 9834.00   | 0.520 | 0.510 |
| In <sub>0.005</sub> Pb <sub>0.995</sub> Te <sub>0.994</sub> l <sub>0.006</sub> | 378 | -153.20 | 81875.00  | 1.882 | 0.375 |
| (Sn <sub>0.8</sub> Ge <sub>0.2</sub> ) <sub>0.94</sub> Mn <sub>0.06</sub> Te   | 473 | 69.40   | 210600.00 | 2.580 | 0.186 |
| AgCuTe <sub>0.7</sub> Se <sub>0.3</sub>                                        | 522 | 231.35  | 13301.00  | 0.367 | 1.013 |
| Sr <sub>0.16</sub> Yb <sub>0.03</sub> Co <sub>4</sub> Sb <sub>11.82</sub>      | 450 | -145.00 | 225455.00 | 3.630 | 0.588 |
| BiSb(Se <sub>0.92</sub> Br <sub>0.08</sub> ) <sub>3</sub>                      | 500 | -163.00 | 20850.00  | 0.530 | 0.523 |
| LiGe <sub>11.5</sub> Sb <sub>2</sub> Te <sub>15</sub>                          | 473 | 242.70  | 39890.00  | 1.326 | 0.838 |
| Sn <sub>1.03</sub> Se <sub>0.12</sub> Te <sub>0.87</sub> Br <sub>0.01</sub>    | 823 | 164.66  | 80802.00  | 2.170 | 0.750 |
| Cr <sub>1.99</sub> Mn <sub>0.01</sub> Ge <sub>2</sub> Te <sub>6</sub>          | 320 | 360.30  | 593.75    | 0.820 | 0.030 |
| Cu <sub>2.94</sub> Ag <sub>0.06</sub> SbSe <sub>4</sub>                        | 498 | 415.00  | 4824.00   | 1.150 | 0.360 |
| Ca <sub>9</sub> Yb <sub>2</sub> Sb <sub>10</sub>                               | 327 | 14.81   | 42490.00  | 0.644 | 0.005 |
| Cu <sub>2</sub> Se <sub>0.5</sub> S <sub>0.5</sub>                             | 520 | 67.82   | 117429.00 | 1.390 | 0.186 |
| AgCuSe                                                                         | 621 | 226.00  | 10130.00  | 0.530 | 0.606 |
| CsPr <sub>2</sub> Ag <sub>3</sub> Te <sub>5</sub>                              | 539 | 141.74  | 169.00    | 0.523 | 0.003 |
| Gd <sub>2</sub> Se <sub>2.92</sub>                                             | 450 | -99.46  | 30316.00  | 1.604 | 0.084 |
| Yb <sub>8</sub> Ca <sub>5</sub> BaMgSb <sub>11</sub>                           | 300 | 63.50   | 14150.00  | 0.529 | 0.030 |
| ZrNiPb <sub>0.94</sub> Sn <sub>0.4</sub> Bi <sub>0.02</sub>                    | 871 | -152.56 | 192500.00 | 5.512 | 0.708 |
| LaCo <sub>0.9</sub> Fe <sub>0.1</sub> O <sub>3</sub>                           | 300 | 598.80  | 39.40     | 0.257 | 0.019 |
| Ag <sub>0.97</sub> Cr <sub>0.99</sub> Sb <sub>0.01</sub> Se <sub>2</sub>       | 753 | 197.01  | 7556.00   | 0.459 | 0.481 |
| Yb <sub>13.43</sub> Ce <sub>0.44</sub> Mn <sub>1.07</sub> Sb <sub>11.07</sub>  | 773 | 173.75  | 19060.00  | 0.655 | 0.679 |
| Ca <sub>6</sub> Yb <sub>5</sub> Sb <sub>10</sub>                               | 701 | 16.74   | 45918.00  | 1.703 | 0.005 |
| CuGa <sub>0.97</sub> Mn <sub>0.03</sub> Te <sub>2</sub>                        | 625 | 232.60  | 21565.00  | 4.072 | 0.179 |
| GeSe <sub>0.7</sub> Te <sub>0.3</sub>                                          | 630 | 34.96   | 61940.00  | 1.563 | 0.031 |
| Cu <sub>2</sub> CdSnSe <sub>4</sub>                                            | 400 | 241.60  | 3138.00   | 2.024 | 0.036 |
| Cu <sub>5.133</sub> Sn <sub>1.866</sub> S <sub>6.3</sub> Cl <sub>0.7</sub>     | 633 | 117.05  | 60267.00  | 1.400 | 0.373 |
| Sn <sub>0.95</sub> Mn <sub>0.05</sub> Te                                       | 720 | 112.70  | 169231.00 | 3.461 | 0.447 |
| Cu <sub>2</sub> Se                                                             | 473 | 58.70   | 241800.00 | 2.733 | 0.144 |
| ZrNiPb <sub>0.94</sub> Sn <sub>0.4</sub> Bi <sub>0.02</sub>                    | 673 | -142.32 | 224655.00 | 5.309 | 0.577 |
| Nd <sub>3</sub> Te <sub>4</sub>                                                | 573 | -43.00  | 245500.00 | 3.280 | 0.075 |
| As <sub>2</sub> Te <sub>2.9</sub> Se <sub>0.1</sub>                            | 523 | 143.56  | 2230.00   | 0.601 | 0.029 |
| Ag <sub>0.02</sub> Cr <sub>1.98</sub> Se <sub>3</sub>                          | 671 | 163.40  | 23723.00  | 1.588 | 0.268 |
| Ba <sub>8.02</sub> Cu <sub>4.98</sub> Si <sub>35</sub> Ge <sub>5.99</sub>      | 615 | -84.30  | 103623.00 | 2.250 | 0.204 |
| Tl <sub>0.22</sub> Co <sub>4</sub> Sb <sub>12</sub>                            | 250 | -105.40 | 118824.00 | 3.515 | 0.094 |
| Cu <sub>2.82</sub> Ag <sub>0.18</sub> SbSe <sub>4</sub>                        | 548 | 383.50  | 7000.00   | 0.830 | 0.690 |
| Ag <sub>0.97</sub> Cr <sub>0.97</sub> Bi <sub>0.03</sub> Se <sub>2</sub>       | 603 | 120.34  | 15410.00  | 0.398 | 0.339 |
| Nb <sub>0.95</sub> Ta <sub>0.05</sub> CoSn <sub>0.9</sub> Sb <sub>0.1</sub>    | 924 | -167.05 | 88227.00  | 4.237 | 0.537 |
| Al <sub>0.0075</sub> Sb <sub>0.1</sub> Ge <sub>0.8925</sub> Te                 | 573 | 214.60  | 52450.00  | 1.428 | 1.000 |
| Sn <sub>0.97</sub> Ce <sub>0.03</sub> Te                                       | 523 | 107.00  | 149480.00 | 2.830 | 0.300 |
| Sn <sub>0.91</sub> Mn <sub>0.09</sub> Te <sub>0.97</sub> l <sub>0.03</sub>     | 720 | 174.23  | 76410.00  | 1.920 | 0.870 |
| In <sub>0.15</sub> Co <sub>4</sub> Sb <sub>11.95</sub>                         | 800 | -243    | 56000.00  | 1.900 | 1.000 |
| BiSbSe <sub>2.76</sub> Cl <sub>0.24</sub>                                      | 300 | -132.00 | 13260.00  | 0.580 | 0.120 |

|                                                                                              |     |         |           |        |       |
|----------------------------------------------------------------------------------------------|-----|---------|-----------|--------|-------|
| Ag <sub>2</sub> Se                                                                           | 350 | -114.03 | 240896.00 | 1.495  | 0.734 |
| (SnTe) <sub>0.96</sub> (CuSbTe <sub>2</sub> ) <sub>0.04</sub>                                | 525 | 59.34   | 246077.00 | 4.385  | 0.104 |
| Sn <sub>0.97</sub> Pb <sub>0.02</sub> Zn <sub>0.01</sub> Se                                  | 673 | 518.44  | 900.00    | 0.696  | 0.234 |
| Cu <sub>2</sub> SnSe <sub>3</sub>                                                            | 700 | 178.28  | 12121.00  | 0.800  | 0.337 |
| Gd <sub>2</sub> Se <sub>2.98</sub>                                                           | 350 | -123.55 | 41835.00  | 2.030  | 0.110 |
| Gd <sub>2.84</sub> Se <sub>4</sub>                                                           | 850 | -139.00 | 21582.00  | 1.290  | 0.275 |
| (Sn <sub>0.8</sub> Ge <sub>0.2</sub> ) <sub>0.8</sub> Mn <sub>0.2</sub> Te                   | 573 | 111.00  | 112869.00 | 1.677  | 0.457 |
| Ca <sub>0.2</sub> BaGd <sub>1.8</sub> NiO <sub>5</sub>                                       | 587 | 166.91  | 129.33    | 1.653  | 0.001 |
| Ag <sub>2</sub> Se <sub>1.02</sub>                                                           | 308 | -141.00 | 125410.00 | 0.975  | 0.800 |
| Sn <sub>1.03</sub> Se <sub>0.15</sub> Te <sub>0.85</sub>                                     | 423 | 25.70   | 361739.00 | 4.283  | 0.024 |
| LiGe <sub>3.5</sub> Sb <sub>2</sub> Te <sub>7</sub>                                          | 673 | 270.00  | 32200.00  | 0.889  | 1.647 |
| Ge <sub>0.55</sub> Pb <sub>0.45</sub> Te                                                     | 671 | 112.42  | 41667.00  | 1.770  | 0.207 |
| BiCuSeO                                                                                      | 423 | 443.00  | 500.00    | 0.658  | 0.063 |
| BiSb(Se <sub>0.94</sub> Br <sub>0.06</sub> ) <sub>3</sub>                                    | 700 | -203.00 | 16277.00  | 0.500  | 0.939 |
| MgAgSb <sub>0.995</sub> In <sub>0.005</sub>                                                  | 500 | 202.36  | 46000.00  | 1.046  | 0.941 |
| Mg <sub>2.16</sub> (Si <sub>0.4</sub> Sn <sub>0.6</sub> ) <sub>0.98</sub> Bi <sub>0.02</sub> | 300 | -122.00 | 185000.00 | 2.770  | 0.298 |
| Zn <sub>2</sub> Cu <sub>3</sub> In <sub>3</sub> Te <sub>8</sub>                              | 668 | 191.40  | 12965.00  | 1.180  | 0.269 |
| AgBi <sub>0.98</sub> Pb <sub>0.02</sub> Se <sub>2.12</sub>                                   | 450 | 400.60  | 4150.00   | 0.621  | 0.483 |
| Ge <sub>0.99</sub> Te                                                                        | 523 | 85.40   | 369792.00 | 3.710  | 0.380 |
| Ta <sub>0.88</sub> Ti <sub>0.12</sub> FeSb                                                   | 770 | 206.70  | 119498.00 | 4.070  | 0.968 |
| In <sub>0.005</sub> Pb <sub>0.995</sub> Te <sub>0.998</sub> l <sub>0.002</sub>               | 481 | -239.00 | 23968.00  | 1.450  | 0.450 |
| SnSe <sub>0.9</sub> S <sub>0.1</sub>                                                         | 673 | 346.23  | 4220.00   | 0.690  | 0.502 |
| Cr <sub>1.99</sub> Fe <sub>0.01</sub> Ge <sub>2</sub> Te <sub>6</sub>                        | 812 | 264.43  | 3820.31   | 0.642  | 0.338 |
| Cu <sub>11.8</sub> Gd <sub>0.2</sub> Sb <sub>4</sub> S <sub>13</sub>                         | 724 | 138.00  | 65650.00  | 1.305  | 0.708 |
| Ba <sub>0.08</sub> La <sub>0.05</sub> Yb <sub>0.08</sub> Co <sub>4</sub> Sb <sub>12</sub>    | 300 | -126    | 239800.00 | 1.300  | 0.400 |
| YbCd <sub>2</sub> Sb <sub>2</sub>                                                            | 550 | 148.87  | 72770.00  | 1.295  | 0.685 |
| Sn <sub>1.03</sub> Se <sub>0.12</sub> Te <sub>0.87</sub> Br <sub>0.01</sub>                  | 323 | 20.75   | 609649.00 | 4.610  | 0.018 |
| Ba <sub>8.04</sub> Cu <sub>4.99</sub> Si <sub>18</sub> Ge <sub>22.98</sub>                   | 566 | -169.80 | 25500.00  | 1.416  | 0.294 |
| Al <sub>0.01</sub> Sb <sub>0.1</sub> Ge <sub>0.89</sub> Te                                   | 573 | 241.13  | 46104.00  | 1.380  | 1.067 |
| Tl <sub>8.97</sub> Sb <sub>1.03</sub> Te <sub>6</sub>                                        | 326 | 118.20  | 43300.00  | 0.671  | 0.291 |
| AgSb <sub>0.99</sub> Mn <sub>0.01</sub> Te <sub>2</sub>                                      | 544 | 150.96  | 35333.00  | 0.911  | 0.481 |
| Eu(Zn <sub>0.5</sub> Cd <sub>0.5</sub> ) <sub>2</sub> Sb <sub>2</sub>                        | 500 | 228.00  | 22487.00  | 1.115  | 0.524 |
| Ba <sub>0.97</sub> K <sub>0.03</sub> Zn <sub>2</sub> As <sub>2</sub>                         | 623 | 86.00   | 72727.00  | 2.300  | 0.146 |
| Sr <sub>0.12</sub> Co <sub>4</sub> Sb <sub>12.46</sub>                                       | 300 | -137    | 90360.00  | 5.100  | 0.100 |
| Cu <sub>1.02</sub> Fe <sub>0.98</sub> S <sub>2</sub>                                         | 50  | -972.73 | 0.17      | 54.250 | 0.000 |
| Zn <sub>0.9</sub> Cd <sub>0.1</sub> Sc <sub>0.04</sub> O <sub>1.06</sub>                     | 573 | -110.20 | 37604.00  | 4.955  | 0.053 |
| EuZn <sub>2</sub> Sb <sub>2</sub>                                                            | 550 | 170.00  | 72000.00  | 1.574  | 0.727 |
| Mg <sub>2</sub> ZnSb <sub>2</sub>                                                            | 773 | 119.87  | 8974.00   | 1.189  | 0.084 |
| Cu <sub>10.5</sub> Ni <sub>1.5</sub> Sb <sub>4</sub> S <sub>13</sub>                         | 617 | 181.00  | 24800.00  | 0.758  | 0.651 |
| Ga <sub>0.10</sub> Co <sub>4</sub> Sb <sub>11.95</sub> Ga <sub>0.05</sub>                    | 600 | -285    | 36700.00  | 2.100  | 0.700 |
| Sr <sub>0.11</sub> Ba <sub>0.18</sub> Co <sub>4</sub> Sb <sub>12.09</sub>                    | 350 | -105.00 | 367593.00 | 4.450  | 0.319 |

|                                                                                |      |         |           |       |       |
|--------------------------------------------------------------------------------|------|---------|-----------|-------|-------|
| PbZn <sub>0.015</sub> Te                                                       | 716  | -269.00 | 23200.00  | 1.089 | 1.097 |
| Cu <sub>2</sub> Se                                                             | 1000 | 236.84  | 21802.00  | 0.868 | 1.409 |
| Ag <sub>8</sub> Sn <sub>0.5</sub> Ga <sub>0.5</sub> Se <sub>6</sub>            | 388  | -520.79 | 66.00     | 0.220 | 0.046 |
| Cu <sub>7</sub> PS <sub>6</sub>                                                | 325  | 97.62   | 2.34      | 0.233 | 0.000 |
| CrO <sub>0.09</sub> N <sub>0.9</sub>                                           | 300  | -48.65  | 35660.00  | 2.750 | 0.009 |
| Pb <sub>0.99</sub> Tl <sub>0.005</sub> Na <sub>0.005</sub> Te                  | 798  | 278.10  | 21238.00  | 0.938 | 1.397 |
| Cu <sub>2</sub> Se <sub>0.92</sub> S <sub>0.08</sub>                           | 850  | 257.28  | 17328.00  | 0.644 | 1.514 |
| Ag <sub>8</sub> SnSe <sub>6</sub>                                              | 330  | -543.00 | 99.00     | 0.213 | 0.045 |
| Ba <sub>0.96</sub> K <sub>0.04</sub> Zn <sub>2</sub> As <sub>2</sub>           | 323  | 45.06   | 145455.00 | 2.950 | 0.032 |
| Li <sub>0.03</sub> Cu <sub>1.8</sub> Bi <sub>0.05</sub> Se                     | 303  | 56.25   | 81609.00  | 0.893 | 0.088 |
| FeNb <sub>0.86</sub> Hf <sub>0.14</sub> Sb                                     | 1000 | 208.50  | 124810.00 | 4.290 | 1.265 |
| Ba <sub>0.11</sub> Yb <sub>0.08</sub> Co <sub>4</sub> Sb <sub>12</sub>         | 700  | -167.93 | 123404.00 | 2.316 | 1.052 |
| Ag <sub>0.97</sub> CuSe                                                        | 298  | -98.10  | 179710.00 | 1.465 | 0.352 |
| Cu <sub>0.98</sub> Pd <sub>0.02</sub> FeS <sub>2</sub>                         | 300  | -306.87 | 9305.00   | 7.386 | 0.036 |
| CuFe <sub>0.98</sub> In <sub>0.02</sub> S <sub>2</sub>                         | 600  | -369.80 | 3936.00   | 2.147 | 0.150 |
| Co <sub>0.99</sub> Ni <sub>0.01</sub> GeTe                                     | 626  | -125.32 | 52926.00  | 4.595 | 0.113 |
| Ag <sub>1.2</sub> Sb <sub>0.8</sub> Pb <sub>14.9</sub> Te <sub>22.7</sub>      | 623  | 316.80  | 3147.00   | 0.920 | 0.214 |
| Yb <sub>7</sub> Ca <sub>6</sub> BaMgSb <sub>11</sub>                           | 500  | 132.40  | 12260.00  | 0.555 | 0.194 |
| TiNiSn                                                                         | 735  | -148.53 | 89147.00  | 4.141 | 0.397 |
| Mg <sub>2</sub> Cu <sub>3</sub> In <sub>3</sub> Te <sub>8</sub>                | 377  | 326.00  | 1620.00   | 2.750 | 0.024 |
| Zn <sub>0.9</sub> Cd <sub>0.1</sub> Sc <sub>0.03</sub> O <sub>1.045</sub>      | 773  | -123.00 | 36040.00  | 3.940 | 0.107 |
| CuGaTe <sub>2</sub>                                                            | 718  | 265.00  | 19450.00  | 2.568 | 0.382 |
| Cu <sub>3</sub> Sb <sub>0.9875</sub> Ge <sub>0.0125</sub> S <sub>4</sub>       | 473  | 404.40  | 2020.00   | 1.072 | 0.147 |
| Ag <sub>0.98</sub> Nb <sub>0.02</sub> BiSe <sub>2.0</sub>                      | 375  | -138.00 | 16000.00  | 0.690 | 0.166 |
| Hf <sub>0.8</sub> Ti <sub>0.2</sub> CoSb <sub>0.8</sub> Sn <sub>0.2</sub>      | 580  | 204.50  | 52300.00  | 2.800 | 0.453 |
| Cu <sub>2</sub> Se                                                             | 850  | 202.30  | 30812.00  | 0.938 | 1.143 |
| Ba <sub>8.04</sub> Cu <sub>4.99</sub> Si <sub>18</sub> Ge <sub>22.98</sub>     | 712  | -132.30 | 25850.00  | 1.760 | 0.183 |
| Cu <sub>2.025</sub> Cd <sub>0.975</sub> SnSe <sub>4</sub>                      | 500  | 186.40  | 6793.00   | 1.315 | 0.090 |
| Ge <sub>1.04</sub> Te                                                          | 673  | 182.00  | 154013.00 | 2.237 | 1.535 |
| Pb <sub>0.975</sub> Zn <sub>0.04</sub> Te                                      | 825  | -242.40 | 27829.00  | 1.183 | 1.144 |
| ZrNiPb <sub>0.96</sub> Sn <sub>0.2</sub> Bi <sub>0.02</sub>                    | 303  | -84.50  | 445128.00 | 6.600 | 0.146 |
| Cu <sub>1.95</sub> In <sub>0.05</sub> Se                                       | 473  | 177.72  | 21622.00  | 1.988 | 0.167 |
| GeSe <sub>0.8</sub> Te <sub>0.2</sub>                                          | 430  | 21.54   | 91045.00  | 1.879 | 0.010 |
| Pb <sub>0.98</sub> Tl <sub>0.01</sub> Na <sub>0.01</sub> Te                    | 696  | 237.91  | 37585.00  | 1.028 | 1.440 |
| Sn <sub>0.87</sub> Mn <sub>0.1</sub> Bi <sub>0.03</sub> Te                     | 623  | 106.00  | 154760.00 | 3.366 | 0.322 |
| In <sub>0.015</sub> Pb <sub>0.985</sub> Te <sub>0.998</sub> l <sub>0.002</sub> | 637  | -232.80 | 15750.00  | 1.355 | 0.403 |
| Cu <sub>5.133</sub> Sn <sub>1.866</sub> S <sub>7</sub>                         | 415  | 32.10   | 370492.00 | 5.213 | 0.030 |
| (Sn <sub>0.8</sub> Ge <sub>0.2</sub> ) <sub>0.85</sub> Mn <sub>0.15</sub> Te   | 673  | 119.30  | 116900.00 | 1.550 | 0.722 |
| Cu <sub>3</sub> SbS <sub>4</sub>                                               | 300  | 670.33  | 89.30     | 1.865 | 0.006 |
| Ag <sub>2.0</sub> Se <sub>0.9</sub> Te <sub>0.1</sub>                          | 360  | -133.80 | 105413.00 | 0.896 | 0.758 |
| Mg <sub>3</sub> Sb <sub>2</sub>                                                | 750  | 288.00  | 2400.00   | 0.600 | 0.249 |

|                                                                                                                     |     |         |           |        |       |
|---------------------------------------------------------------------------------------------------------------------|-----|---------|-----------|--------|-------|
| (Ag <sub>0.15</sub> Sb <sub>0.15</sub> Sn <sub>0.7</sub> )(S <sub>0.15</sub> Se <sub>0.15</sub> Te <sub>0.7</sub> ) | 432 | 113.10  | 64206.00  | 1.189  | 0.298 |
| CuGa <sub>0.99</sub> Mn <sub>0.01</sub> Te <sub>2</sub>                                                             | 475 | 366.85  | 4825.00   | 2.957  | 0.104 |
| Yb <sub>14</sub> MgSb <sub>11</sub>                                                                                 | 800 | 182.26  | 15441.00  | 0.737  | 0.557 |
| TiZr <sub>0.015</sub> NiSn                                                                                          | 729 | -200.92 | 81085.00  | 2.743  | 0.885 |
| Ag(Bi <sub>0.9</sub> Nb <sub>0.1</sub> ) <sub>0.7</sub> Sb <sub>0.3</sub> Se <sub>2</sub>                           | 576 | -270.00 | 3090.00   | 0.544  | 0.238 |
| Yb <sub>10</sub> LaCdSb <sub>9</sub>                                                                                | 773 | 56.54   | 31707.00  | 0.914  | 0.086 |
| AgBi <sub>0.94</sub> Pb <sub>0.06</sub> Se <sub>2.12</sub>                                                          | 400 | 329.00  | 6298.00   | 0.680  | 0.401 |
| Gd <sub>0.04</sub> Co <sub>4</sub> Sb <sub>12</sub>                                                                 | 300 | -226    | 54800.00  | 4.100  | 0.200 |
| Eu <sub>14</sub> MgBi <sub>11</sub>                                                                                 | 717 | 70.30   | 48993.00  | 1.631  | 0.106 |
| Sr <sub>15</sub> Ga <sub>29.5</sub> Ge <sub>55.6</sub>                                                              | 669 | -207.60 | 22733.00  | 1.220  | 0.533 |
| Sn <sub>0.95</sub> Mn <sub>0.05</sub> Te                                                                            | 622 | 89.06   | 224852.00 | 4.105  | 0.270 |
| Tl <sub>8.95</sub> Bi <sub>1.05</sub> Te <sub>6.0</sub>                                                             | 322 | -220.00 | 170.00    | 0.338  | 0.008 |
| Cu <sub>2.05</sub> Cd <sub>0.95</sub> SnSe <sub>4</sub>                                                             | 550 | 156.00  | 18258.00  | 0.965  | 0.253 |
| Cu <sub>0.99</sub> Pd <sub>0.01</sub> FeS <sub>2</sub>                                                              | 50  | -140.46 | 723.40    | 32.500 | 0.000 |
| Pd <sub>0.20</sub> Co <sub>3.80</sub> Sb <sub>12.01</sub>                                                           | 300 | -177    | 125200.00 | 4.900  | 0.200 |
| Li <sub>1.04</sub> Co <sub>0.85</sub> Ni <sub>0.15</sub> O <sub>2</sub>                                             | 723 | 319.50  | 30.90     | 1.421  | 0.002 |
| Sn <sub>1.03</sub> Se <sub>0.15</sub> Te <sub>0.85</sub>                                                            | 323 | 10.83   | 517391.00 | 4.874  | 0.004 |
| CaTiO <sub>3</sub>                                                                                                  | 538 | -257.00 | 2600.00   | 3.670  | 0.025 |
| FeNb <sub>0.88</sub> Ti <sub>0.12</sub> Sb                                                                          | 500 | 140.00  | 250000.00 | 8.240  | 0.297 |
| Ce <sub>0.16</sub> Co <sub>4</sub> Sb <sub>12</sub>                                                                 | 850 | -184    | 128000.00 | 1.000  | 1.200 |
| AgBi <sub>0.99</sub> Pb <sub>0.01</sub> Se <sub>2.12</sub>                                                          | 400 | 548.68  | 379.00    | 0.531  | 0.086 |
| SnTe <sub>0.25</sub> AgSbSe <sub>2</sub>                                                                            | 300 | 65.80   | 133500.00 | 1.854  | 0.094 |
| Ba <sub>8.02</sub> Cu <sub>4.98</sub> Si <sub>35</sub> Ge <sub>5.99</sub>                                           | 517 | -72.00  | 115320.00 | 2.225  | 0.138 |
| Co <sub>0.97</sub> Ni <sub>0.03</sub> GeTe                                                                          | 825 | -97.87  | 86436.00  | 4.679  | 0.146 |
| Mg <sub>3.5</sub> Ho <sub>0.01</sub> Sb <sub>1.97</sub> Te <sub>0.03</sub>                                          | 500 | -261.35 | 15661.00  | 0.873  | 0.613 |
| In <sub>0.015</sub> Pb <sub>0.985</sub> Te <sub>0.994</sub> I <sub>0.006</sub>                                      | 428 | -212.50 | 27700.00  | 1.592  | 0.336 |
| Cu <sub>2.82</sub> Ag <sub>0.18</sub> SbSe <sub>4</sub>                                                             | 598 | 370.00  | 7809.00   | 0.760  | 0.841 |
| Rb <sub>2</sub> Bi <sub>8</sub> Se <sub>12.9935</sub> Cl <sub>0.0065</sub>                                          | 428 | -237.48 | 6029.00   | 0.529  | 0.275 |
| Ag(Bi <sub>0.8</sub> Pb <sub>0.2</sub> ) <sub>0.7</sub> Sb <sub>0.3</sub> Se <sub>2</sub>                           | 526 | 281.10  | 1728.00   | 3.265  | 0.022 |
| AgSn <sub>15.0</sub> BiTe <sub>17.0</sub>                                                                           | 600 | 149.00  | 97115.00  | 1.765  | 0.733 |
| Bi <sub>0.84</sub> Pb <sub>0.08</sub> Yb <sub>0.08</sub> CuSeO                                                      | 847 | 156.74  | 11566.00  | 0.446  | 0.540 |
| Cu <sub>2</sub> SnS <sub>3</sub>                                                                                    | 423 | 340.00  | 170.00    | 1.630  | 0.005 |
| In <sub>0.15</sub> Co <sub>4</sub> Sb <sub>11.95</sub>                                                              | 700 | -259    | 57000.00  | 1.700  | 1.100 |
| Tl <sub>9.0</sub> Bi <sub>0.98</sub> Te <sub>6.0</sub>                                                              | 503 | 239.30  | 14545.00  | 0.390  | 1.074 |
| Eu(Zn <sub>0.5</sub> Cd <sub>0.5</sub> ) <sub>2</sub> Sb <sub>2</sub>                                               | 600 | 244.00  | 19676.00  | 1.000  | 0.703 |
| (SnTe) <sub>40</sub> Sb <sub>2</sub> Te <sub>3</sub>                                                                | 623 | 93.20   | 172994.00 | 3.564  | 0.263 |
| Cu <sub>2.1</sub> Cd <sub>0.9</sub> SnSe <sub>4</sub>                                                               | 500 | 141.00  | 25517.00  | 1.008  | 0.252 |
| NbFe <sub>0.94</sub> Ir <sub>0.06</sub> Sb                                                                          | 300 | -76.80  | 170020.00 | 6.210  | 0.040 |
| Nd <sub>0.15</sub> Co <sub>4</sub> Sb <sub>12</sub>                                                                 | 300 | -133    | 162400.00 | 2.100  | 0.300 |
| (SnTe) <sub>0.94</sub> (CuSbTe <sub>2</sub> ) <sub>0.06</sub>                                                       | 722 | 134.60  | 113100.00 | 2.435  | 0.608 |
| Cu <sub>1.9</sub> Ag <sub>0.1</sub> SnSe <sub>3</sub>                                                               | 700 | 236.87  | 3980.00   | 0.521  | 0.300 |

|                                                                                                |      |         |           |        |       |
|------------------------------------------------------------------------------------------------|------|---------|-----------|--------|-------|
| Sr <sub>0.28</sub> Co <sub>4</sub> Sb <sub>12.88</sub>                                         | 300  | -110    | 271700.00 | 3.400  | 0.200 |
| Co <sub>0.99</sub> Ni <sub>0.01</sub> GeTe                                                     | 394  | -131.49 | 52128.00  | 6.114  | 0.058 |
| Cu <sub>1.5</sub> S                                                                            | 600  | 29.07   | 396154.00 | 5.079  | 0.040 |
| Na <sub>0.36</sub> Co <sub>4</sub> Sb <sub>12</sub>                                            | 300  | -117    | 247000.00 | 4.700  | 0.200 |
| Mo <sub>3</sub> Sb <sub>7</sub> I <sub>1.25</sub>                                              | 623  | 43.20   | 451050.00 | 5.870  | 0.089 |
| Cu <sub>2</sub> Zn <sub>0.6</sub> Fe <sub>0.4</sub> SnSe <sub>4</sub>                          | 673  | 299.13  | 2169.00   | 1.028  | 0.127 |
| FeNb <sub>0.86</sub> Hf <sub>0.14</sub> Sb                                                     | 900  | 195.30  | 148000.00 | 4.447  | 1.142 |
| Ca <sub>3</sub> Co <sub>3.8</sub> Ti <sub>0.2</sub> O <sub>9</sub>                             | 1000 | 239.40  | 6508.00   | 1.918  | 0.194 |
| (Cu <sub>0.001</sub> Pb <sub>0.999</sub> Te)(MnTe) <sub>0.03</sub>                             | 423  | -208.00 | 55724.00  | 1.594  | 0.640 |
| Mg <sub>2.16</sub> Si <sub>0.4</sub> Sn <sub>0.6</sub>                                         | 620  | -204.80 | 5600.00   | 1.696  | 0.084 |
| GeSe                                                                                           | 723  | 629.21  | 231.01    | 0.874  | 0.076 |
| CuAgTe <sub>0.6</sub> Se <sub>0.4</sub>                                                        | 303  | 198.37  | 10945.00  | 0.452  | 0.289 |
| (SnTe) <sub>0.94</sub> (CuSbTe <sub>2</sub> ) <sub>0.06</sub>                                  | 525  | 64.50   | 222000.00 | 3.814  | 0.127 |
| AgBiSe <sub>2.0</sub>                                                                          | 577  | -239.00 | 3478.00   | 0.430  | 0.267 |
| CuFeS <sub>2</sub>                                                                             | 70   | -508.40 | 407.00    | 27.950 | 0.000 |
| Zr <sub>0.5</sub> Hf <sub>0.5</sub> CoSb <sub>0.8</sub> Sn <sub>0.2</sub>                      | 301  | 146.30  | 88760.00  | 2.850  | 0.170 |
| Cu <sub>5</sub> SnSbSe <sub>6.3</sub>                                                          | 573  | 65.17   | 124138.00 | 2.285  | 0.132 |
| Na <sub>0.48</sub> Co <sub>4</sub> Sb <sub>12</sub>                                            | 850  | -203    | 121000.00 | 1.300  | 1.300 |
| Ca <sub>1.18</sub> Yb <sub>3.82</sub> Al <sub>1.84</sub> In <sub>0.16</sub> Sb <sub>6</sub>    | 718  | 48.30   | 27697.00  | 2.342  | 0.016 |
| Ge <sub>0.6</sub> Sb <sub>0.2</sub> Te <sub>0.8</sub> (AgSnSe <sub>2</sub> ) <sub>0.2</sub>    | 323  | 137.27  | 56774.00  | 0.827  | 0.418 |
| AgBi <sub>0.97</sub> Pb <sub>0.03</sub> Se <sub>2.12</sub>                                     | 400  | 375.50  | 3723.00   | 0.595  | 0.353 |
| Sr <sub>0.21</sub> Co <sub>4</sub> Sb <sub>12.25</sub>                                         | 450  | -156.00 | 178636.00 | 4.110  | 0.476 |
| S <sub>0.04</sub> Pd <sub>0.20</sub> Co <sub>3.80</sub> Sb <sub>11.99</sub>                    | 300  | -189    | 85300.00  | 3.200  | 0.300 |
| Sn <sub>0.91</sub> Mn <sub>0.09</sub> Te <sub>0.98</sub> I <sub>0.02</sub>                     | 424  | 80.93   | 178974.00 | 3.023  | 0.164 |
| In <sub>0.01</sub> Pb <sub>0.99</sub> Te <sub>0.998</sub> I <sub>0.002</sub>                   | 663  | -247.70 | 16984.00  | 1.346  | 0.511 |
| Tl <sub>0.1</sub> Co <sub>4</sub> Sb <sub>12</sub>                                             | 250  | -159.00 | 86325.00  | 3.927  | 0.139 |
| Ba <sub>8.02</sub> Cu <sub>4.98</sub> Si <sub>35</sub> Ge <sub>5.99</sub>                      | 713  | -94.63  | 90500.00  | 2.290  | 0.256 |
| In <sub>4</sub> Se <sub>2.32</sub> Cl <sub>0.03</sub>                                          | 323  | -213.10 | 31000.00  | 1.247  | 0.368 |
| Ag <sub>0.8</sub> Sb <sub>0.8</sub> Pb <sub>18.3</sub> Te <sub>20.0</sub>                      | 423  | -337.00 | 4608.00   | 0.856  | 0.259 |
| Cu <sub>7</sub> P(S <sub>0.55</sub> Se <sub>0.45</sub> ) <sub>6</sub>                          | 325  | 283.43  | 398.00    | 0.237  | 0.044 |
| Cr <sub>2</sub> Ge <sub>2</sub> Te <sub>6</sub>                                                | 812  | 264.95  | 3257.80   | 0.630  | 0.295 |
| Rb <sub>2</sub> Bi <sub>8</sub> Se <sub>12.9935</sub> Cl <sub>0.0065</sub>                     | 724  | -250.00 | 4007.00   | 0.495  | 0.366 |
| Sr <sub>0.11</sub> Ba <sub>0.18</sub> Co <sub>4</sub> Sb <sub>12.09</sub>                      | 750  | -158.00 | 222273.00 | 3.900  | 1.067 |
| Hf <sub>0.8</sub> Ti <sub>0.2</sub> CoSb <sub>0.8</sub> Sn <sub>0.2</sub>                      | 1088 | 228.00  | 49500.00  | 2.750  | 1.012 |
| Sn <sub>0.93</sub> Pb <sub>0.06</sub> Zn <sub>0.01</sub> Se                                    | 673  | 525.18  | 710.00    | 0.435  | 0.303 |
| Yb <sub>11</sub> Ca <sub>2</sub> BaMgSb <sub>11</sub>                                          | 400  | 81.77   | 23198.00  | 0.647  | 0.096 |
| CuGaTe <sub>2</sub>                                                                            | 868  | 240.00  | 24300.00  | 2.087  | 0.582 |
| Yb <sub>9</sub> Ca <sub>4</sub> BaMgSb <sub>11</sub>                                           | 900  | 199.70  | 13550.00  | 0.602  | 0.808 |
| LiCoO <sub>2</sub>                                                                             | 523  | 962.76  | 0.40      | 5.898  | 0.000 |
| In <sub>0.005</sub> Pb <sub>0.995</sub> Te <sub>0.998</sub> I <sub>0.002</sub>                 | 637  | -233.50 | 18260.00  | 1.275  | 0.500 |
| Mg <sub>2.16</sub> (Si <sub>0.4</sub> Sn <sub>0.6</sub> ) <sub>0.995</sub> Bi <sub>0.005</sub> | 760  | -262.60 | 37600.00  | 2.035  | 0.974 |

|                                                                                           |      |         |           |        |       |
|-------------------------------------------------------------------------------------------|------|---------|-----------|--------|-------|
| Bi <sub>0.9</sub> Pb <sub>0.1</sub> CuSeO                                                 | 150  | 54.64   | 149712.00 | 2.166  | 0.031 |
| AgSb <sub>0.95</sub> Mn <sub>0.05</sub> Te <sub>2</sub>                                   | 342  | 73.91   | 79733.00  | 1.050  | 0.142 |
| Sr <sub>0.21</sub> Yb <sub>0.03</sub> Co <sub>4</sub> Sb <sub>12.12</sub>                 | 600  | -158.00 | 214545.00 | 3.680  | 0.873 |
| Bi <sub>2.0</sub> S <sub>2.79</sub> Se <sub>0.21</sub>                                    | 523  | -553.00 | 292.00    | 0.550  | 0.085 |
| Cu <sub>2</sub> Se <sub>0.94</sub> S <sub>0.06</sub>                                      | 650  | 194.08  | 29298.00  | 0.770  | 0.932 |
| Cu <sub>7</sub> P(S <sub>0.65</sub> Se <sub>0.35</sub> ) <sub>6</sub>                     | 523  | 279.80  | 1665.00   | 0.230  | 0.296 |
| Sr <sub>0.11</sub> Ba <sub>0.18</sub> Co <sub>4</sub> Sb <sub>12.09</sub>                 | 500  | -130.00 | 288636.00 | 4.060  | 0.601 |
| Ta <sub>0.84</sub> Ti <sub>0.16</sub> FeSb                                                | 970  | 224.00  | 100700.00 | 3.522  | 1.392 |
| (SnTe) <sub>8</sub> Sb <sub>2</sub> Te <sub>3</sub>                                       | 323  | 89.50   | 147875.00 | 2.050  | 0.187 |
| AgSbTe <sub>2</sub>                                                                       | 341  | 96.52   | 35733.00  | 0.941  | 0.121 |
| Ag <sub>2</sub> Se <sub>1.0025</sub>                                                      | 361  | -126.00 | 162800.00 | 1.048  | 0.894 |
| Cu <sub>3</sub> SbSe <sub>4</sub>                                                         | 623  | 303.00  | 5650.00   | 1.100  | 0.280 |
| Ag <sub>0.97</sub> Cr <sub>0.99</sub> Bi <sub>0.01</sub> Se <sub>2</sub>                  | 753  | 187.83  | 7618.00   | 0.404  | 0.501 |
| (SnTe) <sub>0.9</sub> (CuSbTe <sub>2</sub> ) <sub>0.1</sub>                               | 622  | 112.30  | 134400.00 | 2.348  | 0.449 |
| Mg <sub>3.5</sub> Ho <sub>0.03</sub> Sb <sub>2</sub>                                      | 300  | -192.96 | 16695.00  | 1.237  | 0.151 |
| SnTe <sub>0.15</sub> AgSbSe <sub>2</sub>                                                  | 400  | 80.90   | 136577.00 | 2.163  | 0.165 |
| Cu <sub>0.98</sub> Pd <sub>0.02</sub> FeS <sub>2</sub>                                    | 50   | -62.75  | 7134.00   | 20.680 | 0.000 |
| Li <sub>0.03</sub> Cu <sub>1.85</sub> Se                                                  | 301  | 38.83   | 135577.00 | 1.851  | 0.033 |
| Ge <sub>0.9</sub> Mn <sub>0.05</sub> Sb <sub>0.05</sub> Te                                | 773  | 200.65  | 73196.00  | 1.700  | 1.340 |
| Ag(Bi <sub>0.9</sub> Pb <sub>0.1</sub> ) <sub>0.9</sub> Sb <sub>0.1</sub> Se <sub>2</sub> | 478  | 444.44  | 1000.00   | 0.535  | 0.177 |
| Ag <sub>2</sub> Te                                                                        | 650  | -124.70 | 41130.00  | 0.660  | 0.634 |
| FeNb <sub>0.80</sub> Ti <sub>0.20</sub> Sb                                                | 300  | 72.00   | 460000.00 | 7.500  | 0.095 |
| Cu <sub>11.5</sub> Gd <sub>0.5</sub> Sb <sub>4</sub> S <sub>13</sub>                      | 724  | 152.33  | 57372.00  | 1.339  | 0.720 |
| Cu <sub>2</sub> Se <sub>0.98</sub> S <sub>0.02</sub>                                      | 450  | 120.39  | 62782.00  | 0.964  | 0.425 |
| Cu <sub>2</sub> Zn <sub>0.2</sub> Fe <sub>0.8</sub> SnSe <sub>4</sub>                     | 673  | 238.73  | 4134.00   | 0.780  | 0.203 |
| In <sub>0.01</sub> Pb <sub>0.99</sub> Te <sub>0.994</sub> l <sub>0.006</sub>              | 481  | -192.50 | 42100.00  | 1.561  | 0.481 |
| Sn <sub>0.96</sub> Pb <sub>0.01</sub> Cd <sub>0.035</sub> Se                              | 300  | 313.58  | 2508.00   | 0.885  | 0.084 |
| (CaZn <sub>0.4</sub> Ag <sub>0.2</sub> Sb) <sub>0.95</sub> (LiZnSb) <sub>0.05</sub>       | 472  | 122.91  | 52953.00  | 1.037  | 0.364 |
| Cu <sub>2.05</sub> Cd <sub>0.95</sub> SnSe <sub>4</sub>                                   | 650  | 165.30  | 15510.00  | 0.700  | 0.394 |
| Mg <sub>3.07</sub> Sb <sub>1.5</sub> Bi <sub>0.46</sub> Se <sub>0.04</sub>                | 400  | -297.93 | 8149.00   | 0.707  | 0.409 |
| Sn <sub>0.96</sub> Pb <sub>0.03</sub> Zn <sub>0.01</sub> Se                               | 473  | 515.60  | 1137.00   | 0.662  | 0.216 |
| BaBiTe <sub>2.95</sub> Se <sub>0.05</sub>                                                 | 597  | -197.30 | 7430.00   | 0.410  | 0.421 |
| In <sub>4</sub> Se <sub>2.67</sub> Cl <sub>0.03</sub>                                     | 573  | -179.20 | 33333.00  | 0.618  | 0.996 |
| Ag <sub>3.7</sub> Mo <sub>9</sub> Se <sub>11</sub>                                        | 350  | 74.00   | 55400.00  | 1.180  | 0.090 |
| Ba <sub>0.15</sub> Yb <sub>0.01</sub> Co <sub>4</sub> Sb <sub>12.08</sub>                 | 800  | -190    | 100000.00 | 2.000  | 0.800 |
| Li <sub>1.01</sub> Co <sub>0.85</sub> Ni <sub>0.15</sub> O <sub>2</sub>                   | 523  | 291.00  | 1.80      | 1.292  | 0.000 |
| Nb <sub>0.9</sub> Ta <sub>0.1</sub> CoSn <sub>0.9</sub> Sb <sub>0.1</sub>                 | 430  | -111.10 | 129362.00 | 5.015  | 0.137 |
| Cu <sub>2</sub> Se <sub>0.98</sub> S <sub>0.02</sub>                                      | 650  | 179.00  | 35684.00  | 0.858  | 0.866 |
| (PbTe) <sub>0.1</sub> (Ag <sub>2</sub> Te) <sub>0.9</sub>                                 | 450  | -120.30 | 42089.00  | 0.530  | 0.517 |
| Cu <sub>2</sub> Se <sub>0.92</sub> S <sub>0.08</sub>                                      | 1000 | 279.47  | 13496.00  | 0.550  | 1.917 |
| As <sub>2</sub> Te <sub>2.6</sub> Se <sub>0.4</sub>                                       | 523  | 265.50  | 2420.50   | 0.500  | 0.178 |

|                                                                              |      |         |           |       |       |
|------------------------------------------------------------------------------|------|---------|-----------|-------|-------|
| Sn <sub>0.91</sub> Mn <sub>0.08</sub> Bi <sub>0.01</sub> Te                  | 423  | 63.80   | 267800.00 | 4.100 | 0.112 |
| Al <sub>0.03</sub> Ge <sub>0.97</sub> Te                                     | 673  | 111.96  | 262500.00 | 3.919 | 0.565 |
| Sn <sub>0.91</sub> Mn <sub>0.08</sub> Bi <sub>0.01</sub> Te                  | 773  | 144.00  | 116000.00 | 2.480 | 0.750 |
| Cu <sub>3</sub> Sb <sub>0.95</sub> Ge <sub>0.05</sub> S <sub>4</sub>         | 473  | 268.30  | 8355.00   | 1.134 | 0.251 |
| Cu <sub>7</sub> PSe <sub>6</sub>                                             | 673  | 231.00  | 3401.00   | 0.333 | 0.366 |
| Ca <sub>0.1</sub> BaGd <sub>1.9</sub> NiO <sub>5</sub>                       | 1037 | 180.15  | 217.51    | 1.835 | 0.004 |
| BaGd <sub>2</sub> NiO <sub>5</sub>                                           | 1179 | 519.85  | 34.69     | 1.417 | 0.008 |
| Ag <sub>0.01</sub> Cu <sub>1.965</sub> S <sub>0.5</sub> Se <sub>0.5</sub>    | 375  | 136.00  | 7059.00   | 0.622 | 0.079 |
| NbCoSn <sub>0.9</sub> Sb <sub>0.1</sub>                                      | 338  | -85.70  | 149078.00 | 6.708 | 0.055 |
| Sb <sub>2</sub> Si <sub>2</sub> Te <sub>6</sub>                              | 573  | 191.90  | 19404.00  | 0.657 | 0.623 |
| Eu <sub>14</sub> MgBi <sub>11</sub>                                          | 621  | 57.50   | 49660.00  | 1.633 | 0.062 |
| Cr <sub>1.99</sub> Fe <sub>0.01</sub> Ge <sub>2</sub> Te <sub>6</sub>        | 614  | 365.98  | 1515.63   | 0.657 | 0.190 |
| LiCo <sub>0.85</sub> Ni <sub>0.15</sub> O <sub>2</sub>                       | 323  | 200.00  | 0.03      | 1.693 | 0.000 |
| Ca <sub>14</sub> MgBi <sub>11</sub>                                          | 717  | 74.55   | 30041.00  | 1.112 | 0.108 |
| Sn <sub>0.97</sub> Ce <sub>0.03</sub> Te                                     | 323  | 47.00   | 353200.00 | 4.175 | 0.060 |
| Mg <sub>1.98</sub> Ag <sub>0.02</sub> Zn <sub>0.98</sub> Sb <sub>2</sub>     | 673  | 162.40  | 29841.00  | 0.921 | 0.575 |
| Mg <sub>3.5</sub> Ho <sub>0.03</sub> Sb <sub>1.97</sub> Te <sub>0.03</sub>   | 700  | -256.10 | 16667.00  | 0.747 | 1.024 |
| Sn <sub>0.98</sub> In <sub>0.02</sub> Se                                     | 573  | 502.00  | 90.00     | 0.620 | 0.019 |
| Eu <sub>0.10</sub> Co <sub>4</sub> Sb <sub>12</sub>                          | 300  | -171    | 51600.00  | 3.800 | 0.100 |
| Yb <sub>13.44</sub> Ce <sub>0.4</sub> Mn <sub>1.09</sub> Sb <sub>11.07</sub> | 873  | 199.05  | 13840.00  | 0.664 | 0.721 |
| NbCoSn <sub>0.9</sub> Sb <sub>0.1</sub>                                      | 728  | -140.00 | 110000.00 | 5.063 | 0.310 |
| Mg <sub>1.98</sub> K <sub>0.02</sub> Zn <sub>0.98</sub> Sb <sub>2</sub>      | 773  | 184.66  | 17143.00  | 0.874 | 0.517 |
| Sn <sub>0.97</sub> Mn <sub>0.03</sub> Te                                     | 723  | 120.24  | 146746.00 | 3.421 | 0.448 |
| ZrNiPb <sub>0.985</sub> Bi <sub>0.015</sub>                                  | 475  | -122.05 | 261850.00 | 8.361 | 0.222 |
| Ca <sub>5</sub> In <sub>1.98</sub> Zn <sub>0.02</sub> Sb <sub>6</sub>        | 522  | 287.70  | 5340.00   | 0.812 | 0.282 |
| Tl <sub>4</sub> PbTe <sub>3</sub>                                            | 473  | 95.00   | 27500.00  | 0.730 | 0.156 |
| Zn <sub>0.96</sub> Al <sub>0.04</sub> O                                      | 673  | -88.00  | 42350.00  | 2.670 | 0.083 |
| Sr <sub>14.8</sub> Ga <sub>28.6</sub> Ge <sub>56.6</sub>                     | 613  | -112.50 | 79260.00  | 2.415 | 0.255 |
| Sb <sub>0.1</sub> Ge <sub>0.9</sub> Te                                       | 323  | 138.50  | 63300.00  | 1.564 | 0.240 |
| (Cu <sub>0.005</sub> Pb <sub>0.995</sub> Te)(MnTe) <sub>0.03</sub>           | 773  | -168.42 | 70000.00  | 1.557 | 0.986 |
| Nb <sub>0.75</sub> Ta <sub>0.25</sub> CoSn <sub>0.9</sub> Sb <sub>0.1</sub>  | 826  | -172.76 | 80426.00  | 3.722 | 0.533 |
| YbCd <sub>1.1</sub> Zn <sub>0.9</sub> Sb <sub>2</sub>                        | 550  | 125.05  | 86111.00  | 1.400 | 0.502 |
| (Sn <sub>0.8</sub> Ge <sub>0.2</sub> ) <sub>0.8</sub> Mn <sub>0.2</sub> Te   | 873  | 153.00  | 78800.00  | 1.512 | 1.060 |
| Ba <sub>8.02</sub> Cu <sub>5.04</sub> Si <sub>6</sub> Ge <sub>34.93</sub>    | 665  | -124.70 | 52000.00  | 1.400 | 0.384 |
| Cu <sub>2.82</sub> Ag <sub>0.18</sub> SbSe <sub>4</sub>                      | 498  | 395.00  | 6222.00   | 0.900 | 0.537 |
| Sr <sub>0.16</sub> Yb <sub>0.03</sub> Co <sub>4</sub> Sb <sub>11.82</sub>    | 700  | -180.00 | 168182.00 | 3.410 | 1.119 |
| Tl <sub>9.0</sub> Bi <sub>0.97</sub> Te <sub>6.0</sub>                       | 325  | 152.48  | 34090.00  | 0.590 | 0.437 |
| As <sub>2</sub> Te <sub>2.6</sub> Se <sub>0.4</sub>                          | 373  | 228.00  | 1418.00   | 0.537 | 0.049 |
| Ge <sub>9</sub> Sb <sub>2</sub> Te <sub>12</sub>                             | 625  | 112.88  | 120000.00 | 2.823 | 0.338 |
| Zn <sub>0.97</sub> Al <sub>0.03</sub> O                                      | 573  | -85.00  | 40800.00  | 5.960 | 0.028 |
| AgCuTe <sub>0.7</sub> Se <sub>0.3</sub>                                      | 320  | 200.48  | 20194.00  | 0.468 | 0.547 |

|                                  |     |         |           |       |       |
|----------------------------------|-----|---------|-----------|-------|-------|
| Cu7P(S0.25Se0.75)6               | 325 | 215.98  | 2308.00   | 0.269 | 0.130 |
| GeSe0.5Te0.5                     | 728 | 121.36  | 128731.00 | 2.452 | 0.563 |
| Cu1.95S0.5Se0.5                  | 578 | 100.80  | 76634.00  | 1.396 | 0.322 |
| Cu1.99S0.5Se0.5                  | 375 | 167.68  | 3861.00   | 0.517 | 0.079 |
| AgBiSe2.0                        | 425 | -177.30 | 7620.00   | 0.674 | 0.151 |
| Cu22Sn10S32                      | 600 | 86.56   | 127208.00 | 2.340 | 0.244 |
| Mg1.98K0.02Zn0.98Sb2             | 300 | 205.82  | 10688.00  | 0.741 | 0.183 |
| Cu2.88Ag0.12SbSe4                | 423 | 394.00  | 7716.00   | 1.290 | 0.400 |
| Mg0.99Li0.01Ge0.9Si0.1           | 500 | 317.45  | 10846.00  | 3.500 | 0.156 |
| Bi0.42Sb1.58Te3                  | 473 | 217.80  | 27930.00  | 1.115 | 0.562 |
| (CaZn0.4Ag0.2Sb)0.95(LiZnSb)0.05 | 573 | 144.85  | 39394.00  | 0.910 | 0.521 |
| Cu2CdSnSe4                       | 450 | 244.80  | 3328.00   | 1.740 | 0.052 |
| Cu2Zn0.8Fe0.2SnSe4               | 373 | 281.03  | 26.67     | 2.500 | 0.000 |
| Sb0.15Ge0.85Te                   | 823 | 257.04  | 46300.00  | 1.582 | 1.591 |
| ZrNiPb                           | 475 | -260.80 | 16570.00  | 5.768 | 0.093 |
| Rb2Bi8Se12.9415                  | 625 | -217.70 | 6439.00   | 0.587 | 0.325 |
| Ta0.98Ti0.02FeSb                 | 304 | 181.80  | 43600.00  | 8.520 | 0.051 |
| (SnTe)15Sb2Te3                   | 323 | 55.34   | 293376.00 | 3.540 | 0.082 |
| Ba8.02Cu5.04Si6Ge34.93           | 814 | -138.00 | 42180.00  | 1.390 | 0.472 |
| Ag0.03Cu1.945S0.5Se0.5           | 475 | 166.23  | 6176.00   | 0.672 | 0.083 |
| Ti0.9Mn0.1NiSn0.9Sb0.1           | 797 | -132.32 | 217881.00 | 5.550 | 0.548 |
| Mg0.95Li0.05Ge0.9Si0.1           | 400 | 277.20  | 10320.00  | 3.686 | 0.086 |
| (Sn0.8Ge0.2)0.8Mn0.2Te           | 298 | 60.20   | 161000.00 | 2.227 | 0.078 |
| Ag0.97CrSe2                      | 303 | 85.49   | 26857.00  | 0.498 | 0.119 |
| Pb0.99Tl0.005Na0.005Te           | 301 | 115.30  | 81560.00  | 2.472 | 0.132 |
| Cu10.5Ni0.5ZnSb4S13              | 715 | 234.30  | 10300.00  | 0.502 | 0.810 |
| Ba0.11Yb0.08Co4Sb12.08           | 300 | -107    | 211400.00 | 0.900 | 0.300 |
| Bi0.92Pb0.08CuSeO                | 250 | 88.14   | 88916.00  | 2.000 | 0.086 |
| Ca1.58Yb3.42Al2Sb6               | 563 | 42.54   | 21845.00  | 3.500 | 0.006 |
| Ca11Sb10                         | 327 | 19.56   | 824.70    | 0.781 | 0.000 |
| Mg3.07Sb1.5Bi0.44Se0.06          | 400 | -304.30 | 7481.00   | 0.793 | 0.349 |
| Zn2Cu3In3Te8                     | 620 | 187.00  | 13830.00  | 1.314 | 0.228 |
| CuGa0.97Mn0.03Te2                | 375 | 183.70  | 24290.00  | 5.234 | 0.059 |
| Ba8.03Cu5Ge40.97                 | 613 | -156.70 | 32900.00  | 1.254 | 0.395 |
| Li0.03Cu1.83Bi0.02Se             | 761 | 92.25   | 131034.00 | 1.661 | 0.511 |
| LiGe11.5Sb2Te15                  | 373 | 205.40  | 41580.00  | 1.352 | 0.484 |
| Ba8Cu5.18Si9.98Ge30.85           | 415 | -90.40  | 69900.00  | 1.670 | 0.142 |
| Sn1.03Se0.12Te0.87Br0.01         | 423 | 33.20   | 450000.00 | 3.918 | 0.054 |
| Yb10Ca3BaMgSb11                  | 500 | 116.58  | 17877.00  | 0.592 | 0.205 |
| Eu2Zn0.96Sb2                     | 623 | 195.00  | 16224.00  | 0.466 | 0.825 |
| Cu26Ti2Sb4Ge2S32                 | 677 | 200.00  | 30159.00  | 0.902 | 0.905 |



|                                                                                                |      |         |           |       |       |
|------------------------------------------------------------------------------------------------|------|---------|-----------|-------|-------|
| FeNb <sub>0.86</sub> Hf <sub>0.14</sub> Sb                                                     | 1200 | 230.58  | 93023.00  | 4.150 | 1.430 |
| (PbTe)(MnTe) <sub>0.03</sub>                                                                   | 723  | -262.28 | 22897.00  | 1.109 | 1.027 |
| Ag <sub>3.9</sub> Mo <sub>9</sub> Se <sub>11</sub>                                             | 645  | 166.10  | 18600.00  | 0.750 | 0.441 |
| Zn <sub>0.9</sub> Cd <sub>0.1</sub> Sc <sub>0.02</sub> O <sub>1.03</sub>                       | 973  | -139.00 | 32000.00  | 3.260 | 0.185 |
| Al <sub>0.03</sub> Ge <sub>0.97</sub> Te                                                       | 823  | 140.30  | 178571.00 | 3.198 | 0.889 |
| Ba <sub>8.04</sub> Cu <sub>4.9</sub> Si <sub>3.23</sub> Ge <sub>37.83</sub>                    | 517  | -99.50  | 71000.00  | 1.522 | 0.237 |
| Ag <sub>0.97</sub> Cr <sub>0.99</sub> Bi <sub>0.01</sub> Se <sub>2</sub>                       | 403  | 92.80   | 16549.00  | 0.463 | 0.124 |
| YbCd <sub>1.2</sub> Zn <sub>0.8</sub> Sb <sub>2</sub>                                          | 650  | 141.20  | 72900.00  | 1.253 | 0.770 |
| LiCoO <sub>2</sub>                                                                             | 723  | 768.28  | 4.34      | 4.006 | 0.000 |
| Bi <sub>2</sub> Te <sub>3</sub>                                                                | 306  | -114.53 | 45000.00  | 0.957 | 0.189 |
| Sn <sub>0.91</sub> Mn <sub>0.09</sub> Te <sub>0.98</sub> l <sub>0.02</sub>                     | 720  | 164.95  | 78974.00  | 1.802 | 0.859 |
| Ag <sub>0.01</sub> Sn <sub>0.99</sub> Se                                                       | 666  | 405.56  | 845.00    | 0.292 | 0.317 |
| Ta <sub>0.84</sub> Ti <sub>0.16</sub> FeSb                                                     | 570  | 165.50  | 202600.00 | 4.400 | 0.719 |
| Mo <sub>3</sub> Sb <sub>7</sub> l <sub>1.5</sub>                                               | 623  | 28.00   | 392400.00 | 5.390 | 0.036 |
| Sn <sub>0.985</sub> In <sub>0.015</sub> Te                                                     | 323  | 53.28   | 559551.00 | 6.378 | 0.080 |
| Sn <sub>0.99</sub> Mn <sub>0.01</sub> Te                                                       | 719  | 96.48   | 191716.00 | 4.105 | 0.313 |
| Mg <sub>2</sub> Sn <sub>0.99</sub> Sb <sub>0.01</sub>                                          | 444  | -133.00 | 289400.00 | 4.780 | 0.476 |
| Se <sub>0.1</sub> Co <sub>4</sub> Sb <sub>11.8</sub> Se <sub>0.2</sub>                         | 300  | -327    | 6500.00   | 3.200 | 0.100 |
| Tl <sub>0.22</sub> Co <sub>4</sub> Sb <sub>12</sub>                                            | 100  | -53.70  | 214894.00 | 3.900 | 0.016 |
| Cu <sub>2</sub> Sn <sub>0.9</sub> Zn <sub>0.1</sub> S <sub>3</sub>                             | 423  | 92.70   | 46850.00  | 1.588 | 0.107 |
| Li <sub>0.03</sub> Cu <sub>1.82</sub> Bi <sub>0.03</sub> Se                                    | 711  | 90.50   | 119540.00 | 1.732 | 0.402 |
| Mg <sub>2</sub> Sn <sub>0.99</sub> Sb <sub>0.01</sub>                                          | 646  | -170.86 | 167544.00 | 4.428 | 0.714 |
| Mg <sub>3</sub> Sb <sub>1.9</sub> Bi <sub>0.1</sub>                                            | 332  | 278.00  | 302.00    | 1.320 | 0.006 |
| Mg <sub>2</sub> ZnSb <sub>2</sub>                                                              | 573  | 100.00  | 3179.00   | 0.866 | 0.021 |
| Ba <sub>0.11</sub> Yb <sub>0.08</sub> Co <sub>4</sub> Sb <sub>12</sub>                         | 600  | -159.00 | 135100.00 | 2.346 | 0.864 |
| TiNiSn                                                                                         | 323  | -82.80  | 60470.00  | 4.380 | 0.031 |
| Yb <sub>14</sub> MnSb <sub>11</sub>                                                            | 1125 | 178.00  | 19632.00  | 0.940 | 0.744 |
| Mg <sub>2.16</sub> (Si <sub>0.4</sub> Sn <sub>0.6</sub> ) <sub>0.995</sub> Bi <sub>0.005</sub> | 520  | -240.20 | 51744.00  | 1.775 | 0.875 |
| Pb <sub>0.99</sub> Tl <sub>0.01</sub> Te                                                       | 397  | 167.53  | 47296.00  | 1.818 | 0.290 |
| LiCo <sub>0.98</sub> Ni <sub>0.02</sub> O <sub>2</sub>                                         | 923  | 641.10  | 59.68     | 1.580 | 0.014 |
| MgAgSb <sub>0.985</sub> In <sub>0.015</sub>                                                    | 400  | 178.36  | 65045.00  | 1.190 | 0.696 |
| Ba <sub>8</sub> Ga <sub>15.88</sub> Zn <sub>0.007</sub> Sn <sub>30.12</sub>                    | 460  | 389.10  | 13000.00  | 0.886 | 1.022 |
| Mg <sub>3.5</sub> Gd <sub>0.04</sub> Sb <sub>2</sub>                                           | 400  | -250.00 | 14893.00  | 0.910 | 0.409 |
| AgBi <sub>0.85</sub> Sb <sub>0.15</sub> Se <sub>2</sub>                                        | 400  | 561.00  | 25.90     | 0.388 | 0.008 |
| SnTe <sub>0.15</sub> AgSbSe <sub>2</sub>                                                       | 600  | 123.30  | 89000.00  | 1.800 | 0.451 |
| La <sub>0.2</sub> Ca <sub>0.8</sub> TiO <sub>3</sub>                                           | 538  | -92.00  | 118800.00 | 3.410 | 0.159 |
| Sn <sub>0.97</sub> Pb <sub>0.01</sub> Cd <sub>0.025</sub> Se                                   | 673  | 415.67  | 1651.00   | 0.477 | 0.402 |
| Al <sub>0.01</sub> Sb <sub>0.1</sub> Ge <sub>0.89</sub> Te                                     | 773  | 262.10  | 51647.00  | 1.380 | 1.962 |
| Pb <sub>0.97</sub> Tl <sub>0.015</sub> Na <sub>0.015</sub> Te                                  | 798  | 247.06  | 31811.00  | 0.809 | 1.915 |
| AgSb <sub>0.99</sub> Mn <sub>0.01</sub> Te <sub>2</sub>                                        | 394  | 106.67  | 44933.00  | 0.936 | 0.215 |
| Sn <sub>0.92</sub> Ge <sub>0.04</sub> As <sub>0.04</sub> Te                                    | 869  | 109.00  | 185200.00 | 3.529 | 0.751 |

|                                                                                                          |      |         |           |       |       |
|----------------------------------------------------------------------------------------------------------|------|---------|-----------|-------|-------|
| Ag <sub>2</sub> Se <sub>1.06</sub>                                                                       | 377  | -135.96 | 134300.00 | 1.095 | 0.854 |
| (SnTe) <sub>8</sub> Sb <sub>2</sub> Te <sub>3</sub>                                                      | 723  | 178.46  | 70886.00  | 1.730 | 0.943 |
| (SnTe) <sub>8</sub> Sb <sub>2</sub> Te <sub>3</sub>                                                      | 673  | 175.70  | 72700.00  | 1.660 | 0.910 |
| (GeTe) <sub>0.8</sub> (AgSnSe <sub>2</sub> ) <sub>0.2</sub>                                              | 523  | 44.70   | 216700.00 | 2.600 | 0.087 |
| (CaZn <sub>0.4</sub> Ag <sub>0.2</sub> Sb) <sub>0.91</sub> (LiZnSb) <sub>0.09</sub>                      | 371  | 119.33  | 45139.00  | 0.910 | 0.262 |
| Sb <sub>0.15</sub> Ge <sub>0.85</sub> Te                                                                 | 673  | 246.60  | 40750.00  | 1.510 | 1.104 |
| BiCu <sub>0.925</sub> SeO                                                                                | 923  | 304.00  | 2550.00   | 0.875 | 0.257 |
| Mg <sub>0.95</sub> Li <sub>0.05</sub> Ge <sub>0.9</sub> Si <sub>0.1</sub>                                | 300  | 239.00  | 13615.00  | 4.943 | 0.047 |
| Li <sub>0.03</sub> Cu <sub>1.85</sub> Se                                                                 | 706  | 63.55   | 192308.00 | 2.470 | 0.222 |
| TmCuTe <sub>2</sub>                                                                                      | 410  | 91.40   | 75267.00  | 1.386 | 0.186 |
| Bi <sub>0.96</sub> Pb <sub>0.02</sub> Yb <sub>0.02</sub> CuSeO                                           | 747  | 207.89  | 11098.00  | 0.517 | 0.693 |
| Ag(Bi <sub>0.8</sub> Pb <sub>0.2</sub> ) <sub>0.9</sub> Sb <sub>0.1</sub> Se <sub>2</sub>                | 526  | 183.33  | 709.00    | 0.507 | 0.025 |
| (GeTe) <sub>0.8</sub> (AgSnSe <sub>2</sub> ) <sub>0.2</sub>                                              | 323  | 30.43   | 223226.00 | 2.029 | 0.033 |
| Ca <sub>2</sub> Yb <sub>9</sub> Sb <sub>9</sub> Ge                                                       | 608  | 21.48   | 842.86    | 2.224 | 0.000 |
| Cu <sub>2.88</sub> Ag <sub>0.12</sub> SbSe <sub>4</sub>                                                  | 298  | 338.00  | 13611.00  | 2.000 | 0.232 |
| Sn <sub>0.975</sub> Pb <sub>0.01</sub> Cd <sub>0.015</sub> Se                                            | 873  | 322.52  | 6032.00   | 0.524 | 1.045 |
| Ba <sub>8</sub> Cu <sub>5.04</sub> Si <sub>13.01</sub> Ge <sub>27.96</sub>                               | 615  | -111.94 | 61210.00  | 1.821 | 0.259 |
| Ag <sub>0.01</sub> Cu <sub>1.965</sub> S <sub>0.5</sub> Se <sub>0.5</sub>                                | 475  | 120.74  | 10221.00  | 0.726 | 0.097 |
| Br <sub>0.16</sub> Co <sub>4</sub> Sb <sub>11.34</sub> Te <sub>0.52</sub>                                | 850  | -207    | 91000.00  | 1.600 | 1.100 |
| CoAsSb                                                                                                   | 350  | -118.00 | 17720.00  | 2.819 | 0.031 |
| GeSe <sub>0.75</sub> Te <sub>0.25</sub>                                                                  | 728  | 88.30   | 66791.00  | 1.762 | 0.215 |
| Ag <sub>2.0</sub> Se <sub>0.6</sub> Te <sub>0.4</sub>                                                    | 300  | -107.00 | 75500.00  | 0.670 | 0.387 |
| FeNb <sub>0.92</sub> Zr <sub>0.08</sub> Sb                                                               | 1100 | 270.63  | 59800.00  | 6.270 | 0.768 |
| Cu <sub>2</sub> ZnSn <sub>0.98</sub> Ag <sub>0.02</sub> Se <sub>4</sub>                                  | 673  | 133.70  | 36730.00  | 2.907 | 0.130 |
| FeNb <sub>0.88</sub> Hf <sub>0.12</sub> Sb                                                               | 400  | 115.70  | 435000.00 | 7.050 | 0.335 |
| Cu <sub>2.82</sub> Ag <sub>0.18</sub> SbSe <sub>4</sub>                                                  | 298  | 329.00  | 11329.00  | 1.750 | 0.209 |
| Sn <sub>1.03</sub> Se <sub>0.12</sub> Te <sub>0.875</sub> Br <sub>0.005</sub>                            | 323  | 21.20   | 561404.00 | 4.962 | 0.016 |
| NbCoSn <sub>0.9</sub> Sb <sub>0.1</sub>                                                                  | 973  | -179.80 | 98980.00  | 3.530 | 0.610 |
| Nb <sub>0.88</sub> Hf <sub>0.12</sub> FeSb                                                               | 301  | 93.70   | 589360.00 | 4.820 | 0.190 |
| (SnTe) <sub>10</sub> Sb <sub>2</sub> Te <sub>3</sub>                                                     | 673  | 178.50  | 78800.00  | 1.620 | 1.043 |
| AgCuSe                                                                                                   | 479  | 206.37  | 11232.00  | 0.483 | 0.474 |
| Cr <sub>2</sub> Ge <sub>2</sub> Te <sub>6</sub>                                                          | 416  | 514.43  | 218.75    | 0.829 | 0.029 |
| Ba <sub>8.01</sub> Ga <sub>15.88</sub> Zn <sub>0.009</sub> Sn <sub>30.11</sub>                           | 380  | 407.75  | 6797.00   | 0.849 | 0.506 |
| Sn <sub>0.8</sub> Ge <sub>0.2</sub> Te                                                                   | 773  | 109.00  | 156700.00 | 3.454 | 0.417 |
| Ba <sub>0.16</sub> In <sub>0.12</sub> Co <sub>4</sub> Sb <sub>11.85</sub>                                | 300  | -143    | 172100.00 | 1.800 | 0.400 |
| Li <sub>1.1</sub> Co <sub>0.85</sub> Ni <sub>0.15</sub> O <sub>2</sub>                                   | 623  | 269.00  | 34.43     | 2.445 | 0.001 |
| In <sub>3.99</sub> Pb <sub>0.01</sub> Se <sub>3</sub>                                                    | 518  | -252.00 | 11111.00  | 0.880 | 0.415 |
| Ag <sub>3.5</sub> Mo <sub>9</sub> Se <sub>11</sub>                                                       | 350  | 69.75   | 57600.00  | 1.220 | 0.080 |
| Ag <sub>8</sub> Sn <sub>0.7</sub> Ga <sub>0.3</sub> Se <sub>6</sub>                                      | 572  | -296.60 | 1424.00   | 0.278 | 0.258 |
| AgBiSe <sub>2</sub>                                                                                      | 300  | -526.04 | 6.47      | 0.530 | 0.001 |
| (Cu <sub>3</sub> SnS <sub>4</sub> ) <sub>0.895</sub> (Ga <sub>2</sub> Te <sub>3</sub> ) <sub>0.105</sub> | 554  | 88.89   | 122476.00 | 2.357 | 0.227 |

|                                                                                              |      |         |           |       |       |
|----------------------------------------------------------------------------------------------|------|---------|-----------|-------|-------|
| Pb <sub>0.995</sub> Zn <sub>0.02</sub> Te                                                    | 419  | -268.20 | 40600.00  | 1.664 | 0.735 |
| BiCuSeO                                                                                      | 150  | 110.31  | 2.58      | 2.102 | 0.000 |
| Sn <sub>1.03</sub> Se <sub>0.15</sub> Te <sub>0.85</sub>                                     | 823  | 149.33  | 63158.00  | 2.172 | 0.528 |
| AgSb <sub>0.95</sub> Mn <sub>0.05</sub> Te <sub>2</sub>                                      | 297  | 56.70   | 87973.00  | 1.036 | 0.081 |
| Ag(Bi <sub>0.85</sub> Pb <sub>0.15</sub> ) <sub>0.7</sub> Sb <sub>0.3</sub> Se <sub>2</sub>  | 576  | 424.32  | 767.00    | 0.524 | 0.152 |
| Ge <sub>0.55</sub> Pb <sub>0.45</sub> Te                                                     | 373  | 63.35   | 63830.00  | 2.134 | 0.045 |
| Ba <sub>0.5</sub> Cr <sub>5</sub> Se <sub>8</sub>                                            | 389  | 258.16  | 471.00    | 1.167 | 0.010 |
| Ba <sub>0.9</sub> K <sub>0.1</sub> Zn <sub>2</sub> As <sub>2</sub>                           | 323  | 27.16   | 213333.00 | 3.925 | 0.013 |
| Ge <sub>4</sub> Sb <sub>2</sub> Te <sub>7</sub>                                              | 473  | 71.90   | 138764.00 | 1.942 | 0.175 |
| Cu <sub>2</sub> ZnSn <sub>0.925</sub> Ag <sub>0.075</sub> Se <sub>4</sub>                    | 373  | 52.96   | 71429.00  | 3.314 | 0.023 |
| Ba <sub>8.03</sub> Cu <sub>5</sub> Ge <sub>40.97</sub>                                       | 564  | -146.50 | 35600.00  | 1.237 | 0.348 |
| Mg <sub>0.98</sub> Li <sub>0.02</sub> Ge <sub>0.8</sub> Si <sub>0.2</sub>                    | 300  | 326.50  | 2308.00   | 4.302 | 0.017 |
| Cu <sub>3</sub> P <sub>0.8</sub> Ge <sub>0.2</sub> S <sub>4</sub>                            | 350  | 85.00   | 32250.00  | 1.035 | 0.079 |
| Ca <sub>0.1</sub> BaGd <sub>1.9</sub> NiO <sub>5</sub>                                       | 839  | 167.65  | 168.75    | 1.919 | 0.002 |
| YbCd <sub>1.3</sub> Zn <sub>0.7</sub> Sb <sub>2</sub>                                        | 350  | 109.69  | 98726.00  | 1.556 | 0.267 |
| EuCd <sub>2</sub> Sb <sub>2</sub>                                                            | 350  | 246.00  | 10417.00  | 1.224 | 0.180 |
| BaCu <sub>3.96</sub> S <sub>3.0</sub>                                                        | 400  | 68.00   | 23454.00  | 0.714 | 0.061 |
| Ag <sub>1.1</sub> Sb <sub>0.8</sub> Pb <sub>15.5</sub> Te <sub>22.6</sub>                    | 423  | 360.00  | 4350.00   | 1.048 | 0.228 |
| Hf <sub>0.8</sub> Ti <sub>0.2</sub> CoSb <sub>0.8</sub> Sn <sub>0.2</sub>                    | 682  | 217.00  | 50000.00  | 2.730 | 0.589 |
| Cu <sub>2</sub> Se <sub>0.88</sub> S <sub>0.12</sub>                                         | 333  | 117.30  | 62300.00  | 0.564 | 0.501 |
| La <sub>0.25</sub> Ca <sub>0.75</sub> TiO <sub>3</sub>                                       | 1016 | -185.00 | 26000.00  | 2.650 | 0.341 |
| Ba <sub>0.96</sub> K <sub>0.04</sub> Zn <sub>2</sub> As <sub>2</sub>                         | 523  | 72.22   | 72727.00  | 2.071 | 0.096 |
| ZrCo <sub>0.9</sub> Ni <sub>0.1</sub> Bi <sub>0.85</sub> Sb <sub>0.15</sub>                  | 972  | -212.00 | 68790.00  | 1.860 | 1.040 |
| K <sub>0.98</sub> Ba <sub>0.02</sub> GaSb <sub>4</sub>                                       | 324  | -123.13 | 27342.00  | 1.252 | 0.107 |
| Cu <sub>3</sub> SbSe <sub>4</sub>                                                            | 622  | 275.43  | 5847.00   | 1.360 | 0.182 |
| MgAgSb                                                                                       | 550  | 175.82  | 52000.00  | 1.084 | 0.816 |
| Ti <sub>0.99</sub> Mn <sub>0.01</sub> NiSn <sub>0.99</sub> Sb <sub>0.01</sub>                | 498  | -158.10 | 100000.00 | 5.524 | 0.225 |
| (Cu <sub>0.004</sub> Pb <sub>0.996</sub> Te)(MnTe) <sub>0.03</sub>                           | 723  | -158.77 | 74897.00  | 1.557 | 0.877 |
| Ag <sub>0.01</sub> Sn <sub>0.99</sub> Se <sub>0.65</sub> S <sub>0.35</sub>                   | 616  | 470.94  | 262.00    | 0.184 | 0.195 |
| MgAgSb <sub>0.995</sub> In <sub>0.005</sub>                                                  | 400  | 195.45  | 41091.00  | 1.028 | 0.638 |
| SnTe <sub>0.2</sub> AgSbSe <sub>2</sub>                                                      | 650  | 137.55  | 68456.00  | 1.080 | 0.830 |
| Ag <sub>0.9</sub> Sb <sub>0.9</sub> Pb <sub>18.3</sub> Te <sub>19.9</sub>                    | 473  | -320.00 | 5800.00   | 0.910 | 0.309 |
| CoAsSb                                                                                       | 600  | -119.00 | 49815.00  | 3.467 | 0.122 |
| LiCoO <sub>2</sub>                                                                           | 623  | 851.03  | 1.46      | 4.546 | 0.000 |
| Ba <sub>8</sub> Cu <sub>5.18</sub> Si <sub>9.98</sub> Ge <sub>30.85</sub>                    | 566  | -119.00 | 56800.00  | 1.670 | 0.271 |
| CoAsSb                                                                                       | 450  | -132.30 | 28361.00  | 2.889 | 0.077 |
| Ag <sub>8</sub> SnSe <sub>6</sub>                                                            | 523  | -342.70 | 1254.00   | 0.312 | 0.247 |
| Sn <sub>0.99</sub> Mn <sub>0.01</sub> Te                                                     | 424  | 36.33   | 521893.00 | 7.513 | 0.039 |
| Mg <sub>2.16</sub> (Si <sub>0.4</sub> Sn <sub>0.6</sub> ) <sub>0.97</sub> Bi <sub>0.03</sub> | 800  | -216.80 | 89150.00  | 2.330 | 1.439 |
| Ba <sub>0.5</sub> Cr <sub>5</sub> Se <sub>8</sub>                                            | 862  | 225.00  | 2265.00   | 0.867 | 0.114 |
| Cu <sub>2</sub> ZnSn <sub>0.95</sub> Ag <sub>0.05</sub> Se <sub>4</sub>                      | 573  | 65.90   | 164800.00 | 2.560 | 0.160 |

|                                                                                                          |     |         |           |       |       |
|----------------------------------------------------------------------------------------------------------|-----|---------|-----------|-------|-------|
| Ag <sub>2.0</sub> Se <sub>0.6</sub> Te <sub>0.4</sub>                                                    | 390 | -117.50 | 78350.00  | 0.767 | 0.550 |
| Ti <sub>0.97</sub> Mn <sub>0.03</sub> Ni <sub>0.97</sub> Sb <sub>0.03</sub>                              | 398 | -112.20 | 142384.00 | 5.631 | 0.127 |
| Bi <sub>0.96</sub> Ag <sub>0.04</sub> CuSeO                                                              | 473 | 275.20  | 1483.00   | 0.526 | 0.101 |
| Ba <sub>0.10</sub> La <sub>0.05</sub> Yb <sub>0.15</sub> Co <sub>4</sub> Sb <sub>12</sub>                | 300 | -104    | 305800.00 | 1.200 | 0.300 |
| Ag <sub>3.5</sub> Mo <sub>9</sub> Se <sub>11</sub>                                                       | 547 | 107.60  | 41500.00  | 1.150 | 0.227 |
| Ba <sub>0.95</sub> K <sub>0.05</sub> Zn <sub>2</sub> As <sub>2</sub>                                     | 523 | 52.47   | 114286.00 | 2.957 | 0.056 |
| In <sub>4</sub> Se <sub>2.67</sub> Cl <sub>0.03</sub>                                                    | 648 | -208.24 | 29137.00  | 0.600 | 1.365 |
| Ag(Bi <sub>0.85</sub> Nb <sub>0.15</sub> ) <sub>0.7</sub> Sb <sub>0.3</sub> Se <sub>2</sub>              | 326 | -153.00 | 9120.00   | 0.742 | 0.094 |
| Mg <sub>2.16</sub> (Si <sub>0.4</sub> Sn <sub>0.6</sub> ) <sub>0.97</sub> Bi <sub>0.03</sub>             | 400 | -142.90 | 172700.00 | 2.546 | 0.554 |
| GeSe <sub>0.85</sub> Te <sub>0.15</sub>                                                                  | 678 | 40.00   | 55597.00  | 1.733 | 0.035 |
| Bi <sub>1.2</sub> Sb <sub>0.8</sub> Se <sub>2.76</sub> Cl <sub>0.24</sub>                                | 600 | -168.00 | 19392.00  | 0.620 | 0.530 |
| Bi <sub>0.84</sub> Pb <sub>0.08</sub> Yb <sub>0.08</sub> CuSeO                                           | 543 | 121.38  | 20000.00  | 0.583 | 0.274 |
| (Zr <sub>0.4</sub> Hf <sub>0.6</sub> ) <sub>0.88</sub> Nb <sub>0.12</sub> CoSb                           | 300 | -98.90  | 139140.00 | 3.860 | 0.080 |
| AgBi <sub>0.9</sub> Sb <sub>0.1</sub> Se <sub>2</sub>                                                    | 576 | -216.67 | 7286.00   | 0.381 | 0.517 |
| Al <sub>0.005</sub> Sb <sub>0.1</sub> Ge <sub>0.895</sub> Te                                             | 323 | 137.10  | 60964.00  | 1.527 | 0.242 |
| As <sub>2</sub> Te <sub>3</sub>                                                                          | 298 | 118.81  | 185.29    | 0.854 | 0.001 |
| Yb <sub>0.5</sub> Co <sub>4</sub> Sb <sub>12</sub>                                                       | 823 | -170    | 151000.00 | 1.400 | 1.000 |
| Ba <sub>0.98</sub> K <sub>0.02</sub> Zn <sub>2</sub> As <sub>2</sub>                                     | 423 | 94.40   | 103226.00 | 2.383 | 0.163 |
| (GeTe) <sub>0.7</sub> (AgSnSe <sub>2</sub> ) <sub>0.3</sub>                                              | 623 | 54.00   | 65800.00  | 1.337 | 0.089 |
| Cu <sub>2</sub> Sn <sub>0.8</sub> Zn <sub>0.2</sub> S <sub>3</sub>                                       | 423 | 61.00   | 116712.00 | 2.258 | 0.081 |
| ZrNiPb <sub>0.92</sub> Sn <sub>0.6</sub> Bi <sub>0.02</sub>                                              | 871 | -168.66 | 178450.00 | 5.967 | 0.741 |
| Cu <sub>7</sub> P(S <sub>0.65</sub> Se <sub>0.35</sub> ) <sub>6</sub>                                    | 623 | 298.22  | 1693.00   | 0.229 | 0.410 |
| SnSe <sub>0.9</sub> S <sub>0.1</sub>                                                                     | 773 | 339.94  | 4182.00   | 0.587 | 0.651 |
| Li <sub>0.03</sub> Cu <sub>1.8</sub> Bi <sub>0.05</sub> Se                                               | 401 | 52.25   | 67816.00  | 1.214 | 0.061 |
| MgAgSb <sub>0.98</sub> In <sub>0.02</sub>                                                                | 400 | 160.73  | 68288.00  | 1.308 | 0.592 |
| Gd <sub>2</sub> Se <sub>2.94</sub>                                                                       | 650 | -147.80 | 20300.00  | 1.374 | 0.210 |
| Cu <sub>3</sub> P <sub>0.7</sub> Ge <sub>0.3</sub> S <sub>4</sub>                                        | 400 | 78.00   | 54300.00  | 1.260 | 0.105 |
| (Cu <sub>0.003</sub> Pb <sub>0.997</sub> Te)(MnTe) <sub>0.03</sub>                                       | 423 | -202.81 | 59586.00  | 1.568 | 0.661 |
| Pb <sub>0.99</sub> Na <sub>0.01</sub> Te                                                                 | 397 | 99.68   | 157763.00 | 2.694 | 0.231 |
| Ga <sub>0.06</sub> Co <sub>4</sub> Sb <sub>11.97</sub> Ga <sub>0.03</sub>                                | 600 | -315    | 18800.00  | 2.200 | 0.500 |
| AgBi <sub>0.7</sub> Sb <sub>0.3</sub> Se <sub>2</sub>                                                    | 478 | -327.78 | 1125.00   | 0.455 | 0.127 |
| Ag <sub>0.01</sub> Sn <sub>0.99</sub> Se <sub>0.65</sub> S <sub>0.35</sub>                               | 418 | 359.40  | 463.00    | 0.233 | 0.107 |
| Ba <sub>0.06</sub> La <sub>0.05</sub> Yb <sub>0.06</sub> Co <sub>4</sub> Sb <sub>12</sub>                | 850 | -211    | 104600.00 | 1.100 | 1.400 |
| Se <sub>0.1</sub> Co <sub>4</sub> Sb <sub>11.8</sub> Se <sub>0.2</sub>                                   | 800 | -175    | 20200.00  | 2.700 | 0.200 |
| (Cu <sub>3</sub> SnS <sub>4</sub> ) <sub>0.915</sub> (Ga <sub>2</sub> Te <sub>3</sub> ) <sub>0.085</sub> | 331 | 47.47   | 186400.00 | 3.841 | 0.036 |
| Mg <sub>2.16</sub> Si <sub>0.4</sub> Sn <sub>0.6</sub>                                                   | 760 | -145.50 | 12950.00  | 2.410 | 0.085 |
| Ag <sub>0.98</sub> Nb <sub>0.02</sub> BiSe <sub>2.0</sub>                                                | 528 | -189.20 | 7853.00   | 0.610 | 0.243 |
| Sn <sub>0.965</sub> Pb <sub>0.01</sub> Cd <sub>0.025</sub> Se                                            | 723 | 385.10  | 2635.00   | 0.410 | 0.689 |
| Cu <sub>1.875</sub> Ag <sub>0.125</sub> SnSe <sub>3</sub>                                                | 600 | 268.69  | 2724.00   | 0.511 | 0.231 |
| Cu <sub>2</sub> Se <sub>0.94</sub> S <sub>0.06</sub>                                                     | 850 | 247.70  | 18352.00  | 0.703 | 1.350 |
| YbCd <sub>1.6</sub> Zn <sub>0.4</sub> Sb <sub>2</sub>                                                    | 650 | 177.35  | 54233.00  | 1.196 | 1.000 |

|                                                                                           |       |         |           |       |       |
|-------------------------------------------------------------------------------------------|-------|---------|-----------|-------|-------|
| Ge <sub>0.95</sub> Mn <sub>0.05</sub> Te                                                  | 498   | 88.39   | 228866.00 | 3.508 | 0.254 |
| CuFe <sub>0.96</sub> In <sub>0.04</sub> S <sub>2</sub>                                    | 510   | -355.20 | 4244.00   | 2.380 | 0.115 |
| Bi <sub>1.94</sub> Nb <sub>0.06</sub> Te <sub>3</sub>                                     | 478   | -115.07 | 63529.00  | 0.852 | 0.472 |
| Cu <sub>2</sub> Se <sub>0.88</sub> S <sub>0.12</sub>                                      | 550   | 186.00  | 25303.00  | 0.678 | 0.710 |
| Sr <sub>14.1</sub> Ga <sub>29.6</sub> Ge <sub>56.3</sub>                                  | 463   | -140.50 | 54450.00  | 1.510 | 0.330 |
| Ag <sub>8</sub> Sn <sub>0.5</sub> Ga <sub>0.5</sub> Se <sub>6</sub>                       | 673   | -175.93 | 13168.00  | 0.304 | 0.902 |
| Cu <sub>2</sub> Se                                                                        | 333   | 85.10   | 122500.00 | 1.064 | 0.278 |
| Ag <sub>3.7</sub> Mo <sub>9</sub> Se <sub>11</sub>                                        | 743   | 143.80  | 31700.00  | 1.109 | 0.439 |
| ZrNiPb <sub>0.96</sub> Sn <sub>0.2</sub> Bi <sub>0.02</sub>                               | 771   | -148.90 | 231000.00 | 6.050 | 0.653 |
| Ba <sub>8.01</sub> Ga <sub>15.83</sub> Zn <sub>0.019</sub> Sn <sub>30.15</sub>            | 540   | 485.76  | 4254.00   | 1.033 | 0.525 |
| Yb <sub>13.6</sub> Ce <sub>0.363</sub> Mn <sub>0.99</sub> Sb <sub>11.05</sub>             | 873   | 180.00  | 18149.00  | 0.775 | 0.662 |
| Cu <sub>7</sub> P(S <sub>0.5</sub> Se <sub>0.5</sub> ) <sub>6</sub>                       | 673   | 280.00  | 4079.00   | 0.286 | 0.752 |
| In <sub>0.225</sub> Co <sub>4</sub> Sb <sub>11.925</sub>                                  | 800   | -234    | 64000.00  | 1.800 | 1.000 |
| Ba <sub>0.11</sub> Yb <sub>0.03</sub> Co <sub>4</sub> Sb <sub>12</sub>                    | 700   | -175.50 | 111170.00 | 3.038 | 0.780 |
| Ca <sub>3</sub> Co <sub>4</sub> O <sub>9</sub>                                            | 900   | 190.70  | 7576.00   | 2.264 | 0.110 |
| CuGa <sub>0.97</sub> Mn <sub>0.03</sub> Te <sub>2</sub>                                   | 425   | 198.90  | 23250.00  | 4.163 | 0.094 |
| Mg <sub>3.5</sub> Gd <sub>0.03</sub> Sb <sub>1.97</sub> Te <sub>0.03</sub>                | 500   | -251.76 | 17655.00  | 0.780 | 0.717 |
| Bi <sub>2.0</sub> S <sub>2.85</sub> Se <sub>0.15</sub>                                    | 523   | -508.00 | 530.00    | 0.570 | 0.125 |
| Ca <sub>14</sub> MgBi <sub>11</sub>                                                       | 817   | 79.25   | 32088.00  | 1.328 | 0.124 |
| Cu <sub>2.94</sub> Ag <sub>0.06</sub> SbSe <sub>4</sub>                                   | 423   | 439.00  | 4615.00   | 1.420 | 0.265 |
| In <sub>0.015</sub> Pb <sub>0.985</sub> Te <sub>0.998</sub> l <sub>0.002</sub>            | 533   | -235.50 | 15900.00  | 1.430 | 0.326 |
| As <sub>2</sub> Te <sub>2.9</sub> Se <sub>0.1</sub>                                       | 423   | 158.42  | 1508.59   | 0.600 | 0.026 |
| Ag(Bi <sub>0.8</sub> Nb <sub>0.2</sub> ) <sub>0.9</sub> Sb <sub>0.1</sub> Se <sub>2</sub> | 676   | -156.00 | 23635.00  | 0.609 | 0.638 |
| Cu <sub>2</sub> Se <sub>0.96</sub> l <sub>0.04</sub>                                      | 410   | 115.56  | 40864.00  | 0.788 | 0.284 |
| Zn <sub>0.85</sub> Cd <sub>0.15</sub> Sc <sub>0.02</sub> O <sub>1.03</sub>                | 673   | -86.00  | 19200.00  | 4.420 | 0.022 |
| BiSb(Se <sub>0.92</sub> Br <sub>0.08</sub> ) <sub>3</sub>                                 | 600   | -181.00 | 19000.00  | 0.510 | 0.732 |
| Tl <sub>2</sub> GeTe <sub>3</sub>                                                         | 323   | 201.00  | 2850.00   | 0.311 | 0.117 |
| Hf <sub>0.7</sub> Ti <sub>0.3</sub> CoSb <sub>0.8</sub> Sn <sub>0.2</sub>                 | 574.6 | 206.30  | 48900.00  | 2.830 | 0.423 |
| BiSb(Se <sub>0.92</sub> Br <sub>0.08</sub> ) <sub>3</sub>                                 | 800   | -203.00 | 17340.00  | 0.440 | 1.299 |
| Sr <sub>15</sub> Ga <sub>29.5</sub> Ge <sub>55.6</sub>                                    | 568   | -196.60 | 26375.00  | 1.210 | 0.479 |
| Ca <sub>0.1</sub> BaGd <sub>1.9</sub> NiO <sub>5</sub>                                    | 636   | 175.00  | 104.46    | 2.061 | 0.001 |
| Mo <sub>3</sub> Sb <sub>7</sub> l <sub>1.25</sub>                                         | 720   | 50.70   | 422250.00 | 6.031 | 0.129 |
| Bi <sub>0.96</sub> Ag <sub>0.04</sub> CuSeO                                               | 373   | 249.00  | 1565.00   | 0.570 | 0.063 |
| Ca <sub>0.15</sub> BaGd <sub>1.85</sub> NiO <sub>5</sub>                                  | 1084  | 194.12  | 456.71    | 1.621 | 0.012 |
| Cu <sub>3</sub> Sb <sub>0.9875</sub> Ge <sub>0.0125</sub> S <sub>4</sub>                  | 300   | 351.65  | 1580.00   | 1.903 | 0.031 |
| CrO <sub>0.09</sub> N <sub>0.9</sub>                                                      | 100   | -36.35  | 17934.00  | 3.060 | 0.001 |
| AgSbTe <sub>2</sub>                                                                       | 537   | 165.04  | 35467.00  | 1.063 | 0.488 |
| Ag <sub>8</sub> Sn <sub>0.4</sub> Ga <sub>0.6</sub> Se <sub>6</sub>                       | 474   | -442.90 | 295.00    | 0.274 | 0.100 |
| Cu <sub>26</sub> V <sub>2</sub> Ge <sub>5</sub> Sb <sub>3</sub> S <sub>2</sub>            | 594   | 89.00   | 155100.00 | 2.484 | 0.294 |
| TiZr <sub>0.015</sub> NiSn                                                                | 323   | -140.00 | 34615.00  | 2.568 | 0.085 |
| Al <sub>0.02</sub> Ge <sub>0.98</sub> Te                                                  | 473   | 64.82   | 380357.00 | 5.253 | 0.144 |

|                                                                                                          |      |         |           |       |       |
|----------------------------------------------------------------------------------------------------------|------|---------|-----------|-------|-------|
| As <sub>2</sub> Te <sub>3</sub>                                                                          | 423  | 40.59   | 865.96    | 0.684 | 0.001 |
| Gd <sub>2</sub> Se <sub>2.94</sub>                                                                       | 750  | -162.30 | 18300.00  | 1.253 | 0.289 |
| K <sub>0.38</sub> Co <sub>4</sub> Sb <sub>12</sub>                                                       | 800  | -199    | 122000.00 | 2.000 | 1.000 |
| Ca <sub>1.55</sub> Yb <sub>3.45</sub> Al <sub>2</sub> Sb <sub>6</sub>                                    | 420  | 177.07  | 419.00    | 0.908 | 0.006 |
| LiCo <sub>0.98</sub> Ni <sub>0.02</sub> O <sub>2</sub>                                                   | 1023 | 527.40  | 157.86    | 1.409 | 0.032 |
| (CaZn <sub>0.4</sub> Ag <sub>0.2</sub> Sb) <sub>0.91</sub> (LiZnSb) <sub>0.09</sub>                      | 873  | 178.88  | 23713.00  | 0.604 | 1.096 |
| Zn <sub>0.97</sub> Al <sub>0.03</sub> O                                                                  | 673  | -94.00  | 37500.00  | 5.380 | 0.051 |
| Sb <sub>0.15</sub> Ge <sub>0.85</sub> Te                                                                 | 573  | 237.80  | 28349.00  | 1.309 | 0.702 |
| Cu <sub>1.95</sub> In <sub>0.05</sub> Se                                                                 | 672  | 325.25  | 2703.00   | 1.638 | 0.194 |
| Mg <sub>2</sub> Zn <sub>0.96</sub> Sb <sub>2</sub>                                                       | 573  | 207.89  | 9503.00   | 0.734 | 0.320 |
| (Cu <sub>3</sub> SnS <sub>4</sub> ) <sub>0.875</sub> (Ga <sub>2</sub> Te <sub>3</sub> ) <sub>0.125</sub> | 331  | 75.00   | 93015.00  | 2.407 | 0.072 |
| K <sub>0.995</sub> Ba <sub>0.005</sub> GaSb <sub>4</sub>                                                 | 324  | -183.00 | 1633.00   | 0.873 | 0.020 |
| TiZr <sub>0.005</sub> NiSn                                                                               | 522  | -183.00 | 60000.00  | 2.584 | 0.431 |
| Yb <sub>10</sub> Ca <sub>3</sub> BaMgSb <sub>11</sub>                                                    | 800  | 176.52  | 13582.00  | 0.619 | 0.547 |
| Ca <sub>9</sub> Yb <sub>2</sub> Sb <sub>10</sub>                                                         | 513  | 14.37   | 56327.00  | 0.847 | 0.007 |
| Mg <sub>2</sub> Zn <sub>0.98</sub> Sb <sub>2</sub>                                                       | 473  | 283.55  | 5132.00   | 0.671 | 0.291 |
| Cu <sub>2</sub> Se <sub>0.7</sub> S <sub>0.3</sub>                                                       | 520  | 69.80   | 107429.00 | 1.285 | 0.212 |
| Tl <sub>9.0</sub> Sb <sub>1.0</sub> Te <sub>6</sub>                                                      | 502  | 193.00  | 22636.00  | 0.500 | 0.847 |
| Rb <sub>2</sub> Bi <sub>8</sub> Se <sub>12.974</sub> Cl <sub>0.026</sub>                                 | 625  | -128.40 | 13470.00  | 0.710 | 0.195 |
| Ba <sub>0.11</sub> Yb <sub>0.03</sub> Co <sub>4</sub> Sb <sub>12</sub>                                   | 500  | -153.70 | 130800.00 | 3.234 | 0.478 |
| Ti <sub>0.9</sub> Mn <sub>0.1</sub> NiSn <sub>0.9</sub> Sb <sub>0.1</sub>                                | 498  | -100.97 | 292053.00 | 6.087 | 0.244 |
| Mg <sub>2.975</sub> Na <sub>0.025</sub> Sb <sub>2</sub>                                                  | 573  | 126.00  | 37200.00  | 1.345 | 0.252 |
| Mg <sub>3.5</sub> Ho <sub>0.01</sub> Sb <sub>1.97</sub> Te <sub>0.03</sub>                               | 700  | -297.80 | 10755.00  | 0.728 | 0.917 |
| Cu <sub>3</sub> Sb <sub>0.925</sub> Ge <sub>0.075</sub> S <sub>4</sub>                                   | 473  | 225.50  | 16180.00  | 1.193 | 0.326 |
| In <sub>4</sub> Se <sub>2.32</sub> Cl <sub>0.03</sub>                                                    | 598  | -292.80 | 12460.00  | 0.743 | 0.860 |
| Gd <sub>2</sub> Se <sub>2.94</sub>                                                                       | 550  | -130.40 | 24850.00  | 1.532 | 0.152 |
| Ag <sub>0.01</sub> Cu <sub>1.965</sub> S <sub>0.5</sub> Se <sub>0.5</sub>                                | 673  | 168.93  | 38529.00  | 0.907 | 0.816 |
| Sn <sub>0.99</sub> Mn <sub>0.01</sub> Te                                                                 | 332  | 30.08   | 701775.00 | 8.461 | 0.025 |
| TmCuTe <sub>2</sub>                                                                                      | 363  | 83.30   | 86200.00  | 1.500 | 0.145 |
| Sn <sub>0.87</sub> Mn <sub>0.1</sub> Bi <sub>0.03</sub> Te                                               | 523  | 94.00   | 179200.00 | 3.656 | 0.227 |
| K <sub>0.995</sub> Ba <sub>0.005</sub> GaSb <sub>4</sub>                                                 | 416  | -231.60 | 3942.00   | 0.803 | 0.110 |
| Mg <sub>3.5</sub> Ho <sub>0.02</sub> Sb <sub>1.97</sub> Te <sub>0.03</sub>                               | 300  | -217.96 | 25916.00  | 1.143 | 0.323 |
| Mg <sub>3.5</sub> Gd <sub>0.045</sub> Sb <sub>2</sub>                                                    | 600  | -257.39 | 17082.00  | 0.851 | 0.798 |
| Cu <sub>2</sub> Se <sub>0.98</sub> S <sub>0.02</sub>                                                     | 550  | 150.00  | 47443.00  | 0.902 | 0.651 |
| (Bi <sub>0.23</sub> Sb <sub>0.77</sub> ) <sub>2</sub> Te <sub>3</sub>                                    | 500  | 186.74  | 30882.00  | 1.190 | 0.452 |
| Li <sub>0.01</sub> Cu <sub>1.85</sub> Se                                                                 | 399  | 22.73   | 467308.00 | 3.318 | 0.029 |
| (SnTe) <sub>20</sub> Sb <sub>2</sub> Te <sub>3</sub>                                                     | 623  | 117.50  | 136400.00 | 2.810 | 0.418 |
| Mg <sub>3.5</sub> Gd <sub>0.03</sub> Sb <sub>2</sub>                                                     | 400  | -221.07 | 19150.00  | 0.990 | 0.378 |
| Ag <sub>0.02</sub> Cr <sub>1.98</sub> Se <sub>3</sub>                                                    | 512  | 142.80  | 28571.00  | 1.525 | 0.200 |
| Sr <sub>15</sub> Ga <sub>29.5</sub> Ge <sub>55.6</sub>                                                   | 468  | -184.00 | 30610.00  | 1.045 | 0.463 |
| Sn <sub>0.97</sub> Pb <sub>0.01</sub> Cd <sub>0.025</sub> Se                                             | 723  | 398.00  | 2333.00   | 0.482 | 0.554 |

|                                                                                           |      |         |           |       |       |
|-------------------------------------------------------------------------------------------|------|---------|-----------|-------|-------|
| FeNb <sub>0.9</sub> Hf <sub>0.1</sub> Sb                                                  | 400  | 130.10  | 434900.00 | 7.862 | 0.380 |
| Ag <sub>0.02</sub> Cu <sub>1.955</sub> S <sub>0.5</sub> Se <sub>0.5</sub>                 | 475  | 135.74  | 7279.00   | 0.691 | 0.128 |
| Ti <sub>0.925</sub> Mn <sub>0.075</sub> NiSn <sub>0.925</sub> Sb <sub>0.075</sub>         | 697  | -114.81 | 215894.00 | 5.966 | 0.332 |
| Ta <sub>0.84</sub> Ti <sub>0.16</sub> FeSb                                                | 870  | 212.70  | 114485.00 | 3.690 | 1.221 |
| Ca <sub>5</sub> In <sub>2</sub> Sb <sub>6</sub>                                           | 620  | 422.00  | 1000.00   | 0.688 | 0.156 |
| Cu <sub>2</sub> CdSnSe <sub>4</sub>                                                       | 500  | 251.30  | 3466.00   | 1.520 | 0.072 |
| SnTe                                                                                      | 400  | 39.66   | 660577.00 | 7.365 | 0.056 |
| Ca <sub>14</sub> MgSb <sub>11</sub>                                                       | 900  | 160.37  | 6840.00   | 0.704 | 0.225 |
| Eu <sub>14</sub> MgBi <sub>11</sub>                                                       | 424  | 34.77   | 54887.00  | 1.543 | 0.018 |
| Sn <sub>0.98</sub> In <sub>0.02</sub> Se                                                  | 423  | 440.00  | 46.00     | 0.716 | 0.005 |
| Cu <sub>2</sub> Se <sub>0.94</sub> S <sub>0.06</sub>                                      | 372  | 125.00  | 63740.00  | 0.468 | 0.792 |
| Cu <sub>7</sub> P(S <sub>0.75</sub> Se <sub>0.25</sub> ) <sub>6</sub>                     | 422  | 359.17  | 190.00    | 0.188 | 0.055 |
| (SnTe) <sub>0.96</sub> (CuSbTe <sub>2</sub> ) <sub>0.04</sub>                             | 321  | 28.57   | 441207.00 | 5.627 | 0.021 |
| Ta <sub>0.94</sub> Ti <sub>0.06</sub> FeSb                                                | 770  | 240.30  | 76500.00  | 4.365 | 0.785 |
| AgBi <sub>0.95</sub> Sb <sub>0.05</sub> Se <sub>2</sub>                                   | 400  | -377.66 | 20.90     | 0.438 | 0.003 |
| Ba <sub>0.08</sub> Yb <sub>0.09</sub> Co <sub>4</sub> Sb <sub>12</sub>                    | 700  | -184.00 | 122000.00 | 2.410 | 1.200 |
| Nd <sub>2.84</sub> Te <sub>4</sub>                                                        | 1173 | -162.80 | 35950.00  | 1.419 | 0.788 |
| Li <sub>2</sub> Ge <sub>3</sub> Sb <sub>2</sub> Te <sub>7</sub>                           | 723  | 253.33  | 25556.00  | 0.812 | 1.469 |
| Nd <sub>2.92</sub> Te <sub>4</sub>                                                        | 973  | -87.10  | 104516.00 | 2.500 | 0.309 |
| Cu <sub>1.6</sub> S                                                                       | 400  | 20.00   | 406250.00 | 4.110 | 0.016 |
| K <sub>0.985</sub> Ba <sub>0.015</sub> GaSb <sub>4</sub>                                  | 602  | -228.90 | 15796.00  | 0.707 | 0.705 |
| Li <sub>0.02</sub> Cu <sub>1.85</sub> Se                                                  | 399  | 36.23   | 220192.00 | 3.358 | 0.034 |
| Cu <sub>5</sub> SnSbSe <sub>6.3</sub>                                                     | 723  | 93.87   | 80769.00  | 1.860 | 0.298 |
| Cu <sub>26</sub> V <sub>2</sub> Ge <sub>4</sub> Sb <sub>2</sub> S <sub>32</sub>           | 674  | 141.00  | 70500.00  | 1.670 | 0.570 |
| Ca <sub>5</sub> In <sub>2</sub> Sb <sub>6</sub>                                           | 820  | 204.00  | 3250.00   | 0.686 | 0.124 |
| CuAgTe <sub>0.6</sub> Se <sub>0.4</sub>                                                   | 397  | 227.17  | 7651.00   | 0.260 | 0.602 |
| Cu <sub>5</sub> SnSbSe <sub>6.58</sub>                                                    | 673  | 71.49   | 164655.00 | 2.949 | 0.192 |
| Ta <sub>0.98</sub> Ti <sub>0.02</sub> FeSb                                                | 870  | 305.50  | 29250.00  | 4.717 | 0.503 |
| K <sub>0.985</sub> Ba <sub>0.015</sub> GaSb <sub>4</sub>                                  | 649  | -233.00 | 14780.00  | 0.649 | 0.802 |
| Zn <sub>0.9</sub> Cd <sub>0.1</sub> Sc <sub>0.006</sub> O <sub>1.009</sub>                | 300  | -77.00  | 56145.00  | 8.440 | 0.012 |
| Tl <sub>4</sub> SnTe <sub>3</sub>                                                         | 673  | 212.00  | 12450.00  | 0.500 | 0.740 |
| Zn <sub>0.95</sub> Cd <sub>0.05</sub> Sc <sub>0.02</sub> O <sub>1.03</sub>                | 773  | -123.00 | 15000.00  | 5.200 | 0.034 |
| SnSe <sub>0.8</sub> S <sub>0.2</sub>                                                      | 773  | 358.81  | 2917.00   | 0.582 | 0.499 |
| Ge <sub>0.55</sub> Pb <sub>0.45</sub> Te <sub>0.4</sub> Se <sub>0.6</sub>                 | 721  | 281.25  | 9483.00   | 0.666 | 0.917 |
| Bi <sub>0.8</sub> Ba <sub>0.2</sub> CuSeO                                                 | 725  | 211.11  | 10673.00  | 0.695 | 0.607 |
| Mg <sub>2</sub> Cu <sub>3</sub> In <sub>3</sub> Te <sub>8</sub>                           | 866  | 226.00  | 7730.00   | 0.497 | 0.496 |
| Cu <sub>26</sub> Ti <sub>2</sub> Sb <sub>3</sub> Ge <sub>3</sub> S <sub>32</sub>          | 677  | 139.70  | 70370.00  | 1.459 | 0.637 |
| Ag(Bi <sub>0.9</sub> Pb <sub>0.1</sub> ) <sub>0.7</sub> Sb <sub>0.3</sub> Se <sub>2</sub> | 378  | 402.70  | 813.00    | 0.673 | 0.074 |
| Cu <sub>12</sub> Sb <sub>4</sub> S <sub>13</sub>                                          | 525  | 100.10  | 91383.00  | 1.538 | 0.312 |
| Sr <sub>14.1</sub> Ga <sub>29.6</sub> Ge <sub>56.3</sub>                                  | 367  | -125.70 | 61474.00  | 1.465 | 0.240 |
| Ba <sub>0.44</sub> Co <sub>4</sub> Sb <sub>11.90</sub>                                    | 850  | -114    | 340400.00 | 0.100 | 0.600 |

|                                                                                                |     |         |           |       |       |
|------------------------------------------------------------------------------------------------|-----|---------|-----------|-------|-------|
| (Sn <sub>0.8</sub> Ge <sub>0.2</sub> ) <sub>0.85</sub> Mn <sub>0.15</sub> Te                   | 873 | 152.00  | 83300.00  | 1.378 | 1.219 |
| ZrNiPb <sub>0.92</sub> Sn <sub>0.6</sub> Bi <sub>0.02</sub>                                    | 673 | -152.50 | 218470.00 | 5.854 | 0.582 |
| MgAgSb <sub>0.99</sub> In <sub>0.01</sub>                                                      | 550 | 182.73  | 71091.00  | 1.352 | 0.989 |
| Cu <sub>1.99</sub> In <sub>0.01</sub> Se                                                       | 374 | 117.33  | 74324.00  | 0.585 | 0.666 |
| Ta <sub>0.92</sub> Ti <sub>0.08</sub> FeSb                                                     | 770 | 230.60  | 95550.00  | 4.450 | 0.883 |
| Cu <sub>1.97</sub> In <sub>0.03</sub> Se                                                       | 572 | 174.30  | 34899.00  | 0.850 | 0.730 |
| In <sub>0.01</sub> Pb <sub>0.99</sub> Te <sub>0.996</sub> l <sub>0.004</sub>                   | 428 | -210.55 | 35200.00  | 1.577 | 0.424 |
| Ca <sub>0.1</sub> BaGd <sub>1.9</sub> NiO <sub>5</sub>                                         | 421 | 230.88  | 27.60     | 2.423 | 0.000 |
| Ca <sub>3</sub> Co <sub>2</sub> O <sub>6</sub>                                                 | 573 | 174.00  | 630.00    | 6.000 | 0.002 |
| SnTe <sub>0.15</sub> AgSbSe <sub>2</sub>                                                       | 650 | 133.30  | 81500.00  | 1.762 | 0.534 |
| Sn <sub>0.91</sub> Mn <sub>0.09</sub> Te <sub>0.99</sub> l <sub>0.01</sub>                     | 622 | 132.47  | 122564.00 | 2.870 | 0.466 |
| K <sub>8</sub> Ga <sub>8</sub> Ge <sub>38</sub>                                                | 250 | 2.50    | 94.90     | 1.114 | 0.000 |
| Pb <sub>0.97</sub> Tl <sub>0.015</sub> Na <sub>0.015</sub> Te                                  | 397 | 152.27  | 74339.00  | 1.767 | 0.387 |
| Ag <sub>8</sub> GeTe <sub>6</sub>                                                              | 703 | 278.00  | 3000.00   | 0.340 | 0.481 |
| BaBiTe <sub>2.9</sub> Se <sub>0.1</sub>                                                        | 575 | -204.20 | 3890.00   | 0.393 | 0.236 |
| Ti <sub>0.95</sub> Mn <sub>0.05</sub> NiSn <sub>0.95</sub> Sb <sub>0.05</sub>                  | 297 | -93.19  | 255629.00 | 6.705 | 0.098 |
| Nb <sub>0.95</sub> Ta <sub>0.05</sub> CoSn <sub>0.9</sub> Sb <sub>0.1</sub>                    | 826 | -157.00 | 97440.00  | 4.344 | 0.457 |
| Li <sub>0.03</sub> Cu <sub>1.82</sub> Bi <sub>0.03</sub> Se                                    | 303 | 51.75   | 101149.00 | 1.116 | 0.074 |
| In <sub>0.005</sub> Pb <sub>0.995</sub> Te <sub>0.996</sub> l <sub>0.004</sub>                 | 585 | -207.80 | 31410.00  | 1.480 | 0.536 |
| Eu <sub>2</sub> ZnSb <sub>2</sub>                                                              | 623 | 323.00  | 3333.00   | 0.410 | 0.528 |
| Mg <sub>2.16</sub> (Si <sub>0.4</sub> Sn <sub>0.6</sub> ) <sub>0.995</sub> Bi <sub>0.005</sub> | 300 | -176.84 | 75000.00  | 2.263 | 0.311 |
| Ag <sub>0.01</sub> Sn <sub>0.99</sub> Se <sub>0.9</sub> S <sub>0.1</sub>                       | 322 | 300.85  | 1505.00   | 0.332 | 0.132 |
| Ge <sub>0.89</sub> In <sub>0.05</sub> Pb <sub>0.06</sub> Te                                    | 475 | 185.88  | 48117.00  | 1.193 | 0.662 |
| Cu <sub>2.075</sub> Sn <sub>0.925</sub> S <sub>3</sub>                                         | 300 | 35.04   | 356436.00 | 4.330 | 0.030 |
| La <sub>0.7</sub> Co <sub>4</sub> Sb <sub>12</sub>                                             | 473 | -197.30 | 33980.00  | 4.520 | 0.138 |
| Mg <sub>2.16</sub> (Si <sub>0.4</sub> Sn <sub>0.6</sub> ) <sub>0.98</sub> Bi <sub>0.02</sub>   | 700 | -204.10 | 94500.00  | 2.273 | 1.212 |
| Ti <sub>0.99</sub> Mn <sub>0.01</sub> NiSn <sub>0.99</sub> Sb <sub>0.01</sub>                  | 398 | -142.92 | 94400.00  | 5.826 | 0.132 |
| NbCo <sub>0.9</sub> Ni <sub>0.1</sub> Sn                                                       | 803 | -195.88 | 60118.00  | 6.191 | 0.299 |
| Ti <sub>0.925</sub> Mn <sub>0.075</sub> NiSn <sub>0.925</sub> Sb <sub>0.075</sub>              | 398 | -85.19  | 283444.00 | 6.772 | 0.121 |
| Tl <sub>9.0</sub> Bi <sub>0.96</sub> Te <sub>6.0</sub>                                         | 443 | 190.00  | 23500.00  | 0.520 | 0.723 |
| Ag <sub>1.1</sub> Sb <sub>0.8</sub> Pb <sub>15.5</sub> Te <sub>22.6</sub>                      | 673 | 312.00  | 4500.00   | 0.962 | 0.306 |
| BiCuSeO                                                                                        | 825 | 320.50  | 2816.00   | 0.532 | 0.400 |
| Cd <sub>2</sub> Cu <sub>3</sub> In <sub>3</sub> Te <sub>8</sub>                                | 527 | 200.00  | 11000.00  | 1.140 | 0.203 |
| Ag <sub>0.04</sub> Cr <sub>1.96</sub> Se <sub>3</sub>                                          | 671 | 154.12  | 25914.00  | 1.544 | 0.267 |
| Ba <sub>8</sub> Ga <sub>15.88</sub> Zn <sub>0.007</sub> Sn <sub>30.12</sub>                    | 300 | 320.40  | 16750.00  | 1.002 | 0.515 |
| SnTe <sub>0.1</sub> AgSbSe <sub>2</sub>                                                        | 600 | 113.10  | 109350.00 | 2.060 | 0.410 |
| Cu <sub>2</sub> Sn <sub>0.9</sub> Zn <sub>0.1</sub> S <sub>3</sub>                             | 723 | 148.20  | 30000.00  | 0.827 | 0.576 |
| Cu <sub>3</sub> Sb <sub>0.95</sub> Ge <sub>0.05</sub> S <sub>4</sub>                           | 373 | 234.00  | 9200.00   | 1.538 | 0.122 |
| Bi <sub>0.9</sub> Ag <sub>0.1</sub> CuSeO                                                      | 573 | 288.40  | 1934.00   | 0.504 | 0.183 |
| K <sub>0.99</sub> Ba <sub>0.01</sub> GaSb <sub>4</sub>                                         | 649 | -250.00 | 10424.00  | 0.559 | 0.757 |
| Tl <sub>0.8</sub> Co <sub>4</sub> SnSb <sub>11</sub>                                           | 200 | 10.14   | 100000.00 | 2.236 | 0.001 |



|                                                                                             |     |         |           |        |       |
|---------------------------------------------------------------------------------------------|-----|---------|-----------|--------|-------|
| Tl <sub>8.97</sub> Sb <sub>1.03</sub> Te <sub>6</sub>                                       | 445 | 181.00  | 25138.00  | 0.515  | 0.712 |
| (Sn <sub>0.8</sub> Ge <sub>0.2</sub> ) <sub>0.8</sub> Mn <sub>0.2</sub> Te                  | 473 | 92.40   | 130807.00 | 1.740  | 0.304 |
| TiNiSn                                                                                      | 498 | -179.24 | 64238.00  | 4.799  | 0.214 |
| GeTe                                                                                        | 325 | 30.00   | 718750.00 | 7.000  | 0.030 |
| Zn <sub>0.9</sub> Cd <sub>0.1</sub> Sc <sub>0.006</sub> O <sub>1.009</sub>                  | 973 | -139.00 | 30420.00  | 3.400  | 0.168 |
| Cu <sub>3</sub> Sb <sub>0.9</sub> Ge <sub>0.1</sub> S <sub>4</sub>                          | 573 | 227.30  | 17700.00  | 1.025  | 0.511 |
| Yb <sub>13.6</sub> Ce <sub>0.363</sub> Mn <sub>0.99</sub> Sb <sub>11.05</sub>               | 973 | 196.25  | 15396.00  | 0.740  | 0.779 |
| Al <sub>0.02</sub> Ge <sub>0.98</sub> Te                                                    | 323 | 35.89   | 583929.00 | 6.626  | 0.037 |
| Mg <sub>3.07</sub> Sb <sub>1.5</sub> Bi <sub>0.44</sub> Se <sub>0.06</sub>                  | 600 | -311.83 | 9923.00   | 0.701  | 0.825 |
| Ba <sub>7.97</sub> Ga <sub>15.95</sub> Sn <sub>30.10</sub>                                  | 460 | 362.30  | 11183.00  | 0.867  | 0.779 |
| GeSe <sub>0.6</sub> Te <sub>0.4</sub>                                                       | 678 | 110.16  | 131343.00 | 2.748  | 0.393 |
| Ge <sub>0.89</sub> In <sub>0.05</sub> Pb <sub>0.06</sub> Te                                 | 550 | 186.55  | 56373.00  | 1.267  | 0.852 |
| ZnSc <sub>0.02</sub> O <sub>1.03</sub>                                                      | 773 | -244.00 | 6570.00   | 12.083 | 0.025 |
| Mg <sub>2</sub> Zn <sub>1.02</sub> Sb <sub>2</sub>                                          | 300 | 411.84  | 662.00    | 0.712  | 0.047 |
| Cu <sub>2</sub> Se <sub>0.92</sub> S <sub>0.08</sub>                                        | 650 | 201.00  | 27023.00  | 0.724  | 0.980 |
| Tl <sub>4</sub> PbTe <sub>3</sub>                                                           | 523 | 130.00  | 19900.00  | 0.634  | 0.269 |
| Ca <sub>2</sub> Yb <sub>9</sub> Sb <sub>10</sub>                                            | 513 | 8.00    | 125510.00 | 2.146  | 0.002 |
| Mg <sub>3.5</sub> Ho <sub>0.02</sub> Sb <sub>1.97</sub> Te <sub>0.03</sub>                  | 700 | -280.50 | 14059.00  | 0.776  | 0.998 |
| AgBi <sub>0.98</sub> Pb <sub>0.02</sub> Se <sub>2.12</sub>                                  | 300 | 484.20  | 471.20    | 0.504  | 0.066 |
| Ge <sub>0.87</sub> Mn <sub>0.05</sub> Sb <sub>0.08</sub> Te                                 | 648 | 202.00  | 79900.00  | 1.543  | 1.369 |
| Ag <sub>3</sub> RbMo <sub>9</sub> Se <sub>11</sub>                                          | 717 | 146.02  | 16623.00  | 0.889  | 0.286 |
| Ag <sub>0.01</sub> Sn <sub>0.99</sub> Se <sub>0.65</sub> S <sub>0.35</sub>                  | 813 | 385.00  | 910.00    | 0.182  | 0.602 |
| SnSe <sub>0.8</sub> S <sub>0.2</sub>                                                        | 473 | 273.27  | 1841.00   | 0.867  | 0.075 |
| Li <sub>0.03</sub> Cu <sub>1.81</sub> Bi <sub>0.04</sub> Se                                 | 504 | 72.05   | 103448.00 | 1.571  | 0.172 |
| Eu(Zn <sub>0.7</sub> Cd <sub>0.3</sub> ) <sub>2</sub> Sb <sub>2</sub>                       | 400 | 176.00  | 48295.00  | 1.538  | 0.389 |
| Cu <sub>2</sub> Sn <sub>0.9</sub> Zn <sub>0.1</sub> S <sub>3</sub>                          | 323 | 70.70   | 55616.00  | 1.878  | 0.048 |
| Mg <sub>3.5</sub> Gd <sub>0.04</sub> Sb <sub>1.97</sub> Te <sub>0.03</sub>                  | 700 | -253.87 | 16527.00  | 0.614  | 1.214 |
| Ti <sub>0.99</sub> Mn <sub>0.01</sub> NiSn <sub>0.99</sub> Sb <sub>0.01</sub>               | 598 | -167.35 | 105298.00 | 5.456  | 0.323 |
| Sn <sub>0.975</sub> Pb <sub>0.01</sub> Cd <sub>0.015</sub> Se                               | 423 | 356.33  | 2720.00   | 0.852  | 0.171 |
| GeSe <sub>0.95</sub> Te <sub>0.05</sub>                                                     | 725 | 533.00  | 400.00    | 0.689  | 0.120 |
| Sn <sub>0.96</sub> Pb <sub>0.03</sub> Zn <sub>0.01</sub> Se                                 | 573 | 546.20  | 566.00    | 0.565  | 0.171 |
| TaFeSb                                                                                      | 670 | 69.48   | 2908.00   | 5.475  | 0.002 |
| Ca <sub>3</sub> Co <sub>4</sub> O <sub>9</sub>                                              | 700 | 168.60  | 7344.00   | 2.400  | 0.061 |
| CoAsSb                                                                                      | 700 | -104.10 | 68520.00  | 4.000  | 0.130 |
| Er <sub>0.01</sub> (Bi <sub>0.23</sub> Sb <sub>0.77</sub> ) <sub>1.99</sub> Te <sub>3</sub> | 300 | 241.24  | 57647.00  | 0.862  | 1.168 |
| Cu <sub>11.7</sub> Gd <sub>0.3</sub> Sb <sub>4</sub> S <sub>13</sub>                        | 424 | 94.35   | 114608.00 | 1.416  | 0.305 |
| Ba <sub>8.01</sub> Ga <sub>15.83</sub> Zn <sub>0.019</sub> Sn <sub>30.15</sub>              | 300 | 411.46  | 5190.00   | 0.863  | 0.305 |
| GeSe <sub>0.85</sub> Te <sub>0.15</sub>                                                     | 776 | 123.10  | 20522.00  | 1.072  | 0.225 |
| AgBiSe <sub>2.0</sub>                                                                       | 323 | -133.00 | 18550.00  | 0.605  | 0.175 |
| AgBi <sub>0.85</sub> Sb <sub>0.15</sub> Se <sub>2</sub>                                     | 300 | 555.85  | 2.16      | 0.421  | 0.000 |
| BiSb(Se <sub>0.94</sub> Br <sub>0.06</sub> ) <sub>3</sub>                                   | 600 | -186.00 | 17500.00  | 0.510  | 0.712 |

|                                                                                           |      |         |           |        |       |
|-------------------------------------------------------------------------------------------|------|---------|-----------|--------|-------|
| ZrNiPb <sub>0.9</sub> Sn <sub>0.8</sub> Bi <sub>0.02</sub>                                | 673  | -175.24 | 141747.00 | 5.659  | 0.518 |
| Ba <sub>8.01</sub> Ga <sub>15.88</sub> Zn <sub>0.009</sub> Sn <sub>30.11</sub>            | 540  | 444.70  | 6320.00   | 0.974  | 0.693 |
| CuFe <sub>0.92</sub> In <sub>0.08</sub> S <sub>2</sub>                                    | 390  | -373.00 | 2220.00   | 2.826  | 0.042 |
| Ag <sub>2</sub> Se                                                                        | 374  | -102.99 | 286667.00 | 1.755  | 0.634 |
| Mg <sub>3.5</sub> Ho <sub>0.04</sub> Sb <sub>2</sub>                                      | 300  | -188.80 | 19512.00  | 1.340  | 0.156 |
| Gd <sub>2.75</sub> Se <sub>4</sub>                                                        | 750  | -187.32 | 4780.00   | 0.765  | 0.164 |
| AgBi <sub>0.7</sub> Sb <sub>0.3</sub> Se <sub>2</sub>                                     | 326  | -383.33 | 298.00    | 0.482  | 0.030 |
| BaCu <sub>3.96</sub> S <sub>3.0</sub>                                                     | 600  | 102.55  | 17630.00  | 0.844  | 0.132 |
| Bi <sub>1.9</sub> Nb <sub>0.1</sub> Te <sub>3</sub>                                       | 505  | -117.07 | 55714.00  | 0.755  | 0.511 |
| Ba <sub>1.6</sub> Bi <sub>0.4</sub> CoRuO <sub>6</sub>                                    | 518  | 48.00   | 84920.00  | 1.254  | 0.081 |
| Ag <sub>2</sub> Se <sub>1.0025</sub>                                                      | 332  | -127.30 | 146560.00 | 1.000  | 0.789 |
| Ta <sub>0.92</sub> Ti <sub>0.08</sub> FeSb                                                | 570  | 194.80  | 144600.00 | 5.050  | 0.627 |
| Sr <sub>14</sub> MgBi <sub>11</sub>                                                       | 1013 | 138.00  | 50350.00  | 1.400  | 0.694 |
| Mg <sub>3</sub> Sb <sub>1.9</sub> Bi <sub>0.1</sub>                                       | 660  | 393.00  | 986.00    | 0.660  | 0.152 |
| Ca <sub>9</sub> Yb <sub>2</sub> Sb <sub>7</sub> Ge <sub>3</sub>                           | 608  | 75.56   | 619.00    | 1.022  | 0.002 |
| Mg <sub>3.5</sub> Ho <sub>0.02</sub> Sb <sub>2</sub>                                      | 300  | -194.37 | 11239.00  | 1.249  | 0.098 |
| Mg <sub>2</sub> Sn <sub>0.98</sub> Sb <sub>0.02</sub>                                     | 444  | -99.22  | 346429.00 | 5.730  | 0.264 |
| Bi <sub>2.0</sub> S <sub>2.91</sub> Se <sub>0.09</sub>                                    | 423  | -476.00 | 562.00    | 0.660  | 0.082 |
| Cu <sub>11.7</sub> Gd <sub>0.3</sub> Sb <sub>4</sub> S <sub>13</sub>                      | 320  | 80.21   | 117112.00 | 1.392  | 0.173 |
| Zn <sub>0.95</sub> Cd <sub>0.05</sub> Sc <sub>0.02</sub> O <sub>1.03</sub>                | 873  | -132.00 | 14300.00  | 4.580  | 0.047 |
| CoS <sub>2</sub>                                                                          | 150  | -32.05  | 100000    | 12.950 | 0.012 |
| FeNb <sub>0.92</sub> Hf <sub>0.08</sub> Sb                                                | 600  | 187.40  | 169000.00 | 6.150  | 0.579 |
| K <sub>8</sub> Ga <sub>8</sub> Ge <sub>38</sub>                                           | 200  | 1.59    | 117.00    | 1.144  | 0.000 |
| Yb <sub>14</sub> MgBi <sub>11</sub>                                                       | 621  | 61.59   | 66063.00  | 1.886  | 0.083 |
| La <sub>0.5</sub> Co <sub>4</sub> Sb <sub>12</sub>                                        | 473  | 70.20   | 33898.00  | 2.166  | 0.036 |
| Hf <sub>0.7</sub> Ti <sub>0.3</sub> CoSb <sub>0.8</sub> Sn <sub>0.2</sub>                 | 885  | 232.40  | 46300.00  | 2.863  | 0.773 |
| LiCo <sub>0.98</sub> Ni <sub>0.02</sub> O <sub>2</sub>                                    | 423  | 546.58  | 0.00      | 2.489  | 0.000 |
| (SnTe) <sub>12</sub> Sb <sub>2</sub> Te <sub>3</sub>                                      | 523  | 113.28  | 140000.00 | 2.330  | 0.403 |
| (SnTe) <sub>0.92</sub> (CuSbTe <sub>2</sub> ) <sub>0.08</sub>                             | 818  | 157.00  | 92500.00  | 1.739  | 1.072 |
| Sn <sub>0.98</sub> Ce <sub>0.02</sub> Te                                                  | 723  | 142.30  | 76000.00  | 2.090  | 0.550 |
| Sn <sub>0.95</sub> Mn <sub>0.05</sub> Te                                                  | 332  | 43.75   | 471006.00 | 5.658  | 0.053 |
| Mg <sub>3.5</sub> Gd <sub>0.03</sub> Sb <sub>1.97</sub> Te <sub>0.03</sub>                | 600  | -266.55 | 15432.00  | 0.673  | 0.978 |
| Cd <sub>2</sub> Cu <sub>3</sub> In <sub>3</sub> Te <sub>8</sub>                           | 625  | 219.00  | 8330.00   | 0.827  | 0.302 |
| Ag <sub>1.1</sub> Sb <sub>0.8</sub> Pb <sub>15.5</sub> Te <sub>22.6</sub>                 | 523  | 320.00  | 2685.00   | 0.968  | 0.149 |
| TiZr <sub>0.005</sub> NiSn                                                                | 323  | -137.05 | 39385.00  | 2.934  | 0.081 |
| Ag <sub>1.1</sub> Sb <sub>0.8</sub> Pb <sub>15.5</sub> Te <sub>22.6</sub>                 | 573  | 324.80  | 3050.00   | 0.936  | 0.197 |
| Nb <sub>0.83</sub> CoSb                                                                   | 299  | -87.40  | 137290.00 | 4.830  | 0.060 |
| In <sub>0.01</sub> Pb <sub>0.99</sub> Te <sub>0.994</sub> I <sub>0.006</sub>              | 637  | -202.00 | 31406.00  | 1.376  | 0.593 |
| Ag <sub>0.01</sub> Cu <sub>1.965</sub> S <sub>0.5</sub> Se <sub>0.5</sub>                 | 772  | 192.05  | 32500.00  | 0.896  | 1.033 |
| Ag(Bi <sub>0.8</sub> Pb <sub>0.2</sub> ) <sub>0.9</sub> Sb <sub>0.1</sub> Se <sub>2</sub> | 378  | 152.78  | 538.00    | 0.552  | 0.009 |
| Tl <sub>4</sub> PbTe <sub>3</sub>                                                         | 323  | 52.00   | 81800.00  | 1.200  | 0.061 |

|                                                                                                |     |         |           |        |       |
|------------------------------------------------------------------------------------------------|-----|---------|-----------|--------|-------|
| Ba <sub>8</sub> Ga <sub>15.88</sub> Zn <sub>0.007</sub> Sn <sub>30.12</sub>                    | 420 | 374.00  | 13684.00  | 0.893  | 0.905 |
| Ga <sub>0.15</sub> Co <sub>4</sub> Sb <sub>11.925</sub> Ga <sub>0.075</sub>                    | 300 | -246.4  | 31000.00  | 3.000  | 0.200 |
| Cr <sub>1.99</sub> Fe <sub>0.01</sub> Ge <sub>2</sub> Te <sub>6</sub>                          | 515 | 415.30  | 796.88    | 0.724  | 0.098 |
| Ag <sub>8</sub> GeTe <sub>6</sub>                                                              | 329 | 519.00  | 95.00     | 0.253  | 0.033 |
| BaCu <sub>4.0</sub> S <sub>3.0</sub>                                                           | 500 | 92.00   | 12216.00  | 0.810  | 0.064 |
| Cu <sub>2.82</sub> Ag <sub>0.18</sub> SbSe <sub>4</sub>                                        | 523 | 395.30  | 6622.00   | 0.850  | 0.640 |
| AgCuTe <sub>0.8</sub> Se <sub>0.2</sub>                                                        | 422 | 161.63  | 14757.00  | 0.400  | 0.407 |
| Rb <sub>2</sub> Bi <sub>8</sub> Se <sub>13</sub>                                               | 823 | -247.30 | 3220.00   | 0.503  | 0.322 |
| (Zn <sub>0.95</sub> In <sub>0.05</sub> ) <sub>4</sub> Sb <sub>3</sub>                          | 473 | 182.30  | 22700.00  | 0.805  | 0.443 |
| Ca <sub>3</sub> AlSb <sub>3</sub>                                                              | 422 | 351.85  | 326.70    | 0.988  | 0.015 |
| In <sub>0.015</sub> Pb <sub>0.985</sub> Te <sub>0.996</sub> l <sub>0.004</sub>                 | 585 | -230.40 | 19900.00  | 1.293  | 0.474 |
| Ag <sub>0.01</sub> Sn <sub>0.99</sub> Se <sub>0.65</sub> S <sub>0.35</sub>                     | 567 | 443.16  | 249.63    | 0.177  | 0.157 |
| Mg <sub>0.98</sub> Li <sub>0.02</sub> Ge <sub>0.8</sub> Si <sub>0.2</sub>                      | 675 | 312.75  | 8692.00   | 2.272  | 0.253 |
| Cu <sub>11</sub> ZnSb <sub>4</sub> S <sub>13</sub>                                             | 422 | 147.90  | 10700.00  | 0.453  | 0.218 |
| Cu <sub>3</sub> SbSe <sub>4</sub>                                                              | 423 | 368.00  | 3100.00   | 1.845  | 0.096 |
| BiSbSe <sub>2.88</sub> Cl <sub>0.12</sub>                                                      | 300 | -165.00 | 7735.00   | 0.560  | 0.113 |
| BiCuSeO                                                                                        | 773 | 307.00  | 4575.00   | 0.480  | 0.700 |
| GeSe <sub>0.55</sub> Te <sub>0.45</sub>                                                        | 630 | 102.10  | 150741.00 | 1.893  | 0.523 |
| Cu <sub>1.85</sub> Ag <sub>0.15</sub> SnSe <sub>3</sub>                                        | 800 | 401.01  | 2541.00   | 0.314  | 1.040 |
| GeSe <sub>0.7</sub> Te <sub>0.3</sub>                                                          | 678 | 39.59   | 72388.00  | 1.704  | 0.045 |
| In <sub>0.005</sub> Pb <sub>0.995</sub> Te <sub>0.998</sub> l <sub>0.002</sub>                 | 585 | -237.95 | 19841.00  | 1.307  | 0.500 |
| TiZr <sub>0.025</sub> NiSn                                                                     | 323 | -155.66 | 27385.00  | 3.082  | 0.070 |
| Ta <sub>0.92</sub> Ti <sub>0.08</sub> FeSb                                                     | 370 | 150.00  | 234400.00 | 5.985  | 0.331 |
| SnTe                                                                                           | 330 | 11.33   | 742012.00 | 8.066  | 0.004 |
| ZnSc <sub>0.02</sub> O <sub>1.03</sub>                                                         | 473 | -200.00 | 3500.00   | 26.083 | 0.003 |
| Tl <sub>4</sub> SnTe <sub>3</sub>                                                              | 523 | 175.00  | 16400.00  | 0.470  | 0.546 |
| YbCd <sub>1.5</sub> Zn <sub>0.5</sub> Sb <sub>2</sub>                                          | 550 | 170.82  | 60900.00  | 1.251  | 0.870 |
| Ag(Bi <sub>0.8</sub> Nb <sub>0.2</sub> ) <sub>0.9</sub> Sb <sub>0.1</sub> Se <sub>2</sub>      | 326 | -70.00  | 50250.00  | 0.774  | 0.104 |
| Cu <sub>5</sub> Sn <sub>2</sub> S <sub>6.65</sub> Cl <sub>0.35</sub>                           | 515 | 75.00   | 118947.00 | 2.125  | 0.162 |
| Pb <sub>0.98</sub> Tl <sub>0.01</sub> Na <sub>0.01</sub> Te                                    | 597 | 223.20  | 43754.00  | 1.239  | 1.050 |
| Er <sub>0.02</sub> (Bi <sub>0.23</sub> Sb <sub>0.77</sub> ) <sub>1.98</sub> Te <sub>3</sub>    | 300 | 225.00  | 60650.00  | 0.813  | 1.133 |
| Ba <sub>8.01</sub> Ga <sub>15.83</sub> Zn <sub>0.019</sub> Sn <sub>30.15</sub>                 | 580 | 470.10  | 4780.00   | 1.274  | 0.481 |
| Cu <sub>3</sub> Sb <sub>0.92</sub> Ge <sub>0.08</sub> S <sub>4</sub>                           | 323 | 105.30  | 100816.00 | 3.882  | 0.093 |
| Mg <sub>2.16</sub> (Si <sub>0.4</sub> Sn <sub>0.6</sub> ) <sub>0.985</sub> Bi <sub>0.015</sub> | 800 | -224.48 | 74610.00  | 2.266  | 1.327 |
| Mo <sub>3</sub> Sb <sub>7</sub> I                                                              | 723 | 49.73   | 431500.00 | 6.376  | 0.121 |
| Ca <sub>5</sub> In <sub>1.95</sub> Zn <sub>0.05</sub> Sb <sub>6</sub>                          | 822 | 217.40  | 12700.00  | 0.812  | 0.608 |
| Ge <sub>0.96</sub> Mn <sub>0.02</sub> Sb <sub>0.02</sub> Te                                    | 498 | 114.52  | 165979.00 | 2.920  | 0.371 |
| Ca <sub>3</sub> Al <sub>0.98</sub> Zn <sub>0.02</sub> Sb <sub>3</sub>                          | 722 | 274.20  | 3952.00   | 0.738  | 0.287 |
| AgCuTe                                                                                         | 723 | 249.61  | 9029.00   | 0.553  | 0.735 |
| Ba <sub>0.5</sub> Cr <sub>5</sub> Se <sub>8</sub>                                              | 300 | 227.55  | 372.00    | 1.091  | 0.005 |

Table - S2 : Seebeck coefficient, electrical conductivity, thermal conductivity, and figure of merit of various compounds measured at different temperatures (Test data).

| Formula                                                                                                             | T(K) | S( $\mu$ V/K) | $\sigma$ (S/m) | $\kappa$ (W/Km) | ZT    |
|---------------------------------------------------------------------------------------------------------------------|------|---------------|----------------|-----------------|-------|
| Sn <sub>0.97</sub> Ce <sub>0.03</sub> Te                                                                            | 423  | 71.40         | 231645.0       | 3.500           | 0.143 |
| Cu <sub>1.925</sub> Ag <sub>0.075</sub> SnSe <sub>3</sub>                                                           | 600  | 142.42        | 8576.0         | 0.676           | 0.154 |
| Cu <sub>26</sub> V <sub>2</sub> Ge <sub>3</sub> Sb <sub>3</sub> S <sub>32</sub>                                     | 497  | 162.04        | 37544.0        | 1.202           | 0.408 |
| (Ag <sub>0.05</sub> Sb <sub>0.05</sub> Sn <sub>0.9</sub> )(S <sub>0.05</sub> Se <sub>0.05</sub> Te <sub>0.9</sub> ) | 434  | 68.32         | 201869.0       | 3.176           | 0.129 |
| Yb <sub>13.43</sub> Ce <sub>0.44</sub> Mn <sub>1.07</sub> Sb <sub>11.07</sub>                                       | 373  | 64.69         | 41057.0        | 0.731           | 0.088 |
| (Zn <sub>0.98</sub> In <sub>0.02</sub> ) <sub>4</sub> Sb <sub>3</sub>                                               | 423  | 151.30        | 31920.0        | 0.810           | 0.382 |
| LiCo <sub>0.85</sub> Ni <sub>0.15</sub> O <sub>2</sub>                                                              | 523  | 308.97        | 1.3            | 2.045           | 0.000 |
| Cu <sub>0.9</sub> Pd <sub>0.1</sub> FeS <sub>2</sub>                                                                | 200  | -123.66       | 37855.0        | 7.160           | 0.016 |
| La <sub>0.15</sub> Ca <sub>0.85</sub> TiO <sub>3</sub>                                                              | 740  | -143.45       | 35484.0        | 3.040           | 0.178 |
| Yb <sub>13.43</sub> Ce <sub>0.44</sub> Mn <sub>1.07</sub> Sb <sub>11.07</sub>                                       | 573  | 124.44        | 27520.0        | 0.716           | 0.341 |
| Cu <sub>1.95</sub> S <sub>0.5</sub> Se <sub>0.5</sub>                                                               | 673  | 124.85        | 66980.0        | 1.304           | 0.539 |
| (SnTe) <sub>10</sub> Sb <sub>2</sub> Te <sub>3</sub>                                                                | 623  | 167.69        | 87722.0        | 1.670           | 0.920 |
| As <sub>2</sub> Te <sub>2.6</sub> Se <sub>0.4</sub>                                                                 | 423  | 249.20        | 1852.5         | 0.534           | 0.088 |
| Ba <sub>8.03</sub> Cu <sub>5</sub> Ge <sub>40.97</sub>                                                              | 760  | -165.10       | 27735.0        | 1.380           | 0.418 |
| Mo <sub>3</sub> Sb <sub>7</sub> I <sub>1.5</sub>                                                                    | 723  | 35.75         | 366600.0       | 5.590           | 0.061 |
| CuGa <sub>0.98</sub> Mn <sub>0.02</sub> Te <sub>2</sub>                                                             | 575  | 294.60        | 10789.0        | 2.943           | 0.183 |
| Cu <sub>3</sub> Sb <sub>0.94</sub> Ge <sub>0.06</sub> S <sub>4</sub>                                                | 323  | 132.45        | 58163.0        | 3.444           | 0.096 |
| S <sub>0.08</sub> Pd <sub>0.20</sub> Co <sub>3.80</sub> Sb <sub>12.04</sub>                                         | 600  | -262          | 43900.0        | 2.400           | 0.600 |
| Ag <sub>0.03</sub> Cu <sub>1.945</sub> S <sub>0.5</sub> Se <sub>0.5</sub>                                           | 578  | 168.44        | 26397.0        | 0.902           | 0.400 |
| Cu <sub>0.99</sub> Pd <sub>0.01</sub> FeS <sub>2</sub>                                                              | 30   | -123.66       | 220.7          | 34.430          | 0.000 |
| Ti <sub>0.9</sub> Mn <sub>0.1</sub> NiSn <sub>0.9</sub> Sb <sub>0.1</sub>                                           | 297  | -74.81        | 347682.0       | 6.859           | 0.084 |
| Bi <sub>0.96</sub> Ag <sub>0.04</sub> CuSeO                                                                         | 323  | 229.00        | 1623.0         | 0.575           | 0.048 |
| Ca <sub>0.2</sub> BaGd <sub>1.8</sub> NiO <sub>5</sub>                                                              | 1095 | 170.59        | 418.2          | 1.511           | 0.009 |
| Mg <sub>2.975</sub> Na <sub>0.025</sub> Sb <sub>2</sub>                                                             | 373  | 89.00         | 39000.0        | 1.840           | 0.063 |
| Sn <sub>1.03</sub> Se <sub>0.12</sub> Te <sub>0.88</sub>                                                            | 823  | 152.50        | 64050.0        | 2.230           | 0.550 |
| (SnTe) <sub>0.92</sub> (CuSbTe <sub>2</sub> ) <sub>0.08</sub>                                                       | 719  | 139.29        | 106800.0       | 2.087           | 0.714 |
| Ag(Bi <sub>0.9</sub> Nb <sub>0.1</sub> ) <sub>0.7</sub> Sb <sub>0.3</sub> Se <sub>2</sub>                           | 378  | -179.00       | 6607.0         | 0.623           | 0.128 |
| NbCoSn                                                                                                              | 375  | -195.29       | 58698.0        | 11.762          | 0.071 |
| Er <sub>0.01</sub> (Bi <sub>0.23</sub> Sb <sub>0.77</sub> ) <sub>1.99</sub> Te <sub>3</sub>                         | 500  | 195.83        | 31000.0        | 1.260           | 0.472 |
| YbSi <sub>2</sub>                                                                                                   | 300  | -52.60        | 747000.0       | 8.600           | 0.072 |
| Sn <sub>0.91</sub> Mn <sub>0.09</sub> Te <sub>0.99</sub> I <sub>0.01</sub>                                          | 424  | 81.96         | 194872.0       | 3.458           | 0.161 |
| Yb <sub>14</sub> MgBi <sub>11</sub>                                                                                 | 521  | 47.95         | 68224.0        | 1.820           | 0.045 |
| ZnSc <sub>0.02</sub> O <sub>1.03</sub>                                                                              | 873  | -256.47       | 6428.0         | 10.000          | 0.037 |
| Ba <sub>7.97</sub> Ga <sub>15.95</sub> Sn <sub>30.06</sub>                                                          | 340  | 336.62        | 13463.0        | 0.923           | 0.562 |
| Ba <sub>1.4</sub> Bi <sub>0.6</sub> CoRuO <sub>6</sub>                                                              | 318  | 301.00        | 7310.0         | 1.200           | 0.176 |
| Tl <sub>0.8</sub> Co <sub>4</sub> SnSb <sub>11</sub>                                                                | 50   | 1.01          | 123171.0       | 2.285           | 0.000 |
| Tl <sub>2</sub> GeTe <sub>3</sub>                                                                                   | 373  | 212.00        | 3350.0         | 0.297           | 0.192 |

|                                                                                             |      |         |          |        |       |
|---------------------------------------------------------------------------------------------|------|---------|----------|--------|-------|
| Eu(Zn <sub>0.5</sub> Cd <sub>0.5</sub> ) <sub>2</sub> Sb <sub>2</sub>                       | 350  | 189.00  | 29000.0  | 1.432  | 0.253 |
| Na <sub>0.23</sub> Co <sub>4</sub> Sb <sub>12</sub>                                         | 850  | -200    | 56000.0  | 2.700  | 0.500 |
| NbCoSn                                                                                      | 474  | -208.70 | 53254.0  | 10.480 | 0.105 |
| Cu <sub>3</sub> Sb <sub>0.996</sub> In <sub>0.004</sub> Se <sub>4</sub>                     | 373  | 250.30  | 6182.0   | 2.000  | 0.072 |
| AgCuTe <sub>0.5</sub> Se <sub>0.5</sub>                                                     | 422  | 146.00  | 2715.0   | 0.227  | 0.095 |
| In <sub>4</sub> Pb <sub>0.01</sub> Sn <sub>0.03</sub> Se <sub>2.9</sub> Cl <sub>0.06</sub>  | 723  | -255.00 | 10988.0  | 0.532  | 0.964 |
| Sb <sub>2</sub> Si <sub>2</sub> Te <sub>6</sub>                                             | 473  | 168.32  | 24312.0  | 0.750  | 0.434 |
| Ag(Bi <sub>0.85</sub> Pb <sub>0.15</sub> ) <sub>0.9</sub> Sb <sub>0.1</sub> Se <sub>2</sub> | 378  | 436.11  | 289.4    | 0.581  | 0.036 |
| Ca <sub>1.55</sub> Yb <sub>3.45</sub> Al <sub>2</sub> Sb <sub>6</sub>                       | 563  | 175.00  | 1317.0   | 0.870  | 0.026 |
| Ag <sub>2</sub> Se                                                                          | 309  | -129.15 | 135738.0 | 1.041  | 0.690 |
| Sb <sub>0.05</sub> Ge <sub>0.95</sub> Te                                                    | 473  | 121.48  | 189908.0 | 2.836  | 0.467 |
| Bi <sub>0.84</sub> Pb <sub>0.08</sub> Yb <sub>0.08</sub> CuSeO                              | 640  | 135.20  | 17297.0  | 0.520  | 0.389 |
| Ta <sub>0.88</sub> Ti <sub>0.12</sub> FeSb                                                  | 970  | 231.00  | 86500.0  | 3.658  | 1.224 |
| GeSe <sub>0.9</sub> Te <sub>0.1</sub>                                                       | 630  | 118.05  | 3000.0   | 1.218  | 0.022 |
| Ti <sub>0.98</sub> Mn <sub>0.02</sub> NiSn <sub>0.98</sub> Sb <sub>0.02</sub>               | 398  | -121.30 | 159603.0 | 5.799  | 0.161 |
| Yb <sub>13.6</sub> Ce <sub>0.363</sub> Mn <sub>0.99</sub> Sb <sub>11.05</sub>               | 673  | 138.73  | 25897.0  | 0.832  | 0.403 |
| CsPr <sub>2</sub> Ag <sub>3</sub> Te <sub>5</sub>                                           | 616  | 156.42  | 434.0    | 0.439  | 0.015 |
| Cu <sub>3</sub> P <sub>0.8</sub> Ge <sub>0.2</sub> S <sub>4</sub>                           | 500  | 121.60  | 27600.0  | 0.925  | 0.221 |
| Yb <sub>14</sub> MgBi <sub>11</sub>                                                         | 914  | 97.95   | 57031.0  | 1.600  | 0.313 |
| Cu <sub>0.98</sub> Pd <sub>0.02</sub> FeS <sub>2</sub>                                      | 10   | -18.30  | 3652.0   | 10.900 | 0.000 |
| Ba <sub>1.4</sub> Bi <sub>0.6</sub> CoRuO <sub>6</sub>                                      | 518  | 92.70   | 50000.0  | 1.135  | 0.196 |
| Pb <sub>0.96</sub> Tl <sub>0.02</sub> Na <sub>0.02</sub> Te                                 | 301  | 120.13  | 102249.0 | 2.161  | 0.206 |
| Zn <sub>0.9</sub> Cd <sub>0.1</sub> Sc <sub>0.006</sub> O <sub>1.009</sub>                  | 1173 | -156.00 | 25300.0  | 2.920  | 0.247 |
| Ag <sub>0.03</sub> Cr <sub>1.97</sub> Se <sub>3</sub>                                       | 725  | 152.11  | 25000.0  | 1.623  | 0.258 |
| (SnTe) <sub>20</sub> Sb <sub>2</sub> Te <sub>3</sub>                                        | 773  | 156.50  | 93900.0  | 2.310  | 0.770 |
| CuGa <sub>0.97</sub> Mn <sub>0.03</sub> Te <sub>2</sub>                                     | 670  | 238.80  | 22350.0  | 2.461  | 0.347 |
| Eu(Zn <sub>0.9</sub> Cd <sub>0.1</sub> ) <sub>2</sub> Sb <sub>2</sub>                       | 400  | 150.50  | 87000.0  | 1.910  | 0.413 |
| Er <sub>0.03</sub> (Bi <sub>0.23</sub> Sb <sub>0.77</sub> ) <sub>1.97</sub> Te <sub>3</sub> | 300  | 216.50  | 62300.0  | 0.840  | 1.050 |
| Rb <sub>2</sub> Bi <sub>8</sub> Se <sub>12.9935</sub>                                       | 526  | -291.00 | 4015.0   | 0.532  | 0.336 |
| Cu <sub>2.82</sub> Ag <sub>0.18</sub> SbSe <sub>4</sub>                                     | 573  | 378.00  | 7396.0   | 0.800  | 0.750 |
| Bi <sub>0.8</sub> Ba <sub>0.2</sub> CuSeO                                                   | 825  | 219.14  | 10000.0  | 0.688  | 0.679 |
| Tl <sub>8.99</sub> Sb <sub>1.01</sub> Te <sub>6</sub>                                       | 503  | 179.75  | 26055.0  | 0.528  | 0.802 |
| FeNb <sub>0.88</sub> Ti <sub>0.12</sub> Sb                                                  | 900  | 214.00  | 90000.0  | 5.500  | 0.674 |
| Cu <sub>2</sub> Se <sub>0.96</sub> I <sub>0.04</sub>                                        | 300  | 84.70   | 64438.0  | 0.740  | 0.187 |
| Eu(Zn <sub>0.9</sub> Cd <sub>0.1</sub> ) <sub>2</sub> Sb <sub>2</sub>                       | 650  | 198.00  | 58200.0  | 1.392  | 1.065 |
| Mg <sub>0.98</sub> Li <sub>0.02</sub> Ge <sub>0.8</sub> Si <sub>0.2</sub>                   | 400  | 361.07  | 2538.0   | 3.359  | 0.039 |
| Sn <sub>0.96</sub> Pb <sub>0.01</sub> Cd <sub>0.035</sub> Se                                | 473  | 357.00  | 3651.0   | 0.507  | 0.434 |
| Ba <sub>0.15</sub> In <sub>0.20</sub> Co <sub>4</sub> Sb <sub>11.84</sub>                   | 300  | -140    | 181000.0 | 1.800  | 0.400 |
| Tl <sub>4</sub> SnTe <sub>3</sub>                                                           | 473  | 160.00  | 18200.0  | 0.450  | 0.480 |
| AgBiSe <sub>2</sub>                                                                         | 575  | 375.00  | 314.0    | 0.435  | 0.060 |
| Mg <sub>2</sub> Zn <sub>1.02</sub> Sb <sub>2</sub>                                          | 573  | 72.19   | 4172.0   | 0.850  | 0.015 |

|                                                                                               |     |         |          |       |       |
|-----------------------------------------------------------------------------------------------|-----|---------|----------|-------|-------|
| Mg <sub>3.07</sub> Sb <sub>1.5</sub> Bi <sub>0.44</sub> Se <sub>0.06</sub>                    | 700 | -314.09 | 10117.0  | 0.676 | 1.033 |
| (Sn <sub>0.8</sub> Ge <sub>0.2</sub> ) <sub>0.82</sub> Mn <sub>0.18</sub> Te                  | 773 | 141.30  | 90910.0  | 1.535 | 0.914 |
| As <sub>2</sub> Te <sub>2.8</sub> Se <sub>0.2</sub>                                           | 473 | 226.26  | 2011.7   | 0.551 | 0.088 |
| Tl <sub>8.99</sub> Bi <sub>1.01</sub> Te <sub>6.0</sub>                                       | 382 | 271.00  | 6500.0   | 0.340 | 0.536 |
| Cd <sub>2</sub> Cu <sub>3</sub> In <sub>3</sub> Te <sub>8</sub>                               | 477 | 184.20  | 13000.0  | 1.290 | 0.163 |
| AgCuSe                                                                                        | 549 | 215.92  | 11513.0  | 0.500 | 0.589 |
| Ag <sub>2.0</sub> Se <sub>0.6</sub> Te <sub>0.4</sub>                                         | 315 | -108.00 | 77156.0  | 0.688 | 0.412 |
| Pb <sub>0.995</sub> Zn <sub>0.02</sub> Te                                                     | 622 | -312.30 | 21908.0  | 1.160 | 1.160 |
| Bi <sub>0.96</sub> Ag <sub>0.04</sub> CuSeO                                                   | 523 | 280.20  | 1596.0   | 0.520 | 0.126 |
| CuAgTe <sub>0.7</sub> Se <sub>0.3</sub>                                                       | 408 | 252.45  | 6349.0   | 0.286 | 0.578 |
| Pb <sub>0.99</sub> Tl <sub>0.005</sub> Na <sub>0.005</sub> Te                                 | 597 | 253.92  | 31576.0  | 1.194 | 1.018 |
| Ca <sub>9</sub> Yb <sub>2</sub> Sb <sub>10</sub>                                              | 419 | 14.96   | 52245.0  | 0.750 | 0.007 |
| Tl <sub>9.0</sub> Sb <sub>0.97</sub> Te <sub>6</sub>                                          | 447 | 155.00  | 32000.0  | 0.612 | 0.562 |
| Yb <sub>13.6</sub> Ce <sub>0.363</sub> Mn <sub>0.99</sub> Sb <sub>11.05</sub>                 | 373 | 59.37   | 46330.0  | 0.877 | 0.069 |
| Co <sub>0.99</sub> Ni <sub>0.01</sub> GeTe                                                    | 825 | -87.23  | 80319.0  | 5.046 | 0.100 |
| Ag <sub>8</sub> Sn <sub>0.5</sub> Ga <sub>0.5</sub> Se <sub>6</sub>                           | 732 | -130.37 | 23531.0  | 0.300 | 0.910 |
| Co <sub>4</sub> Sb <sub>11.5</sub> Te <sub>0.5</sub>                                          | 850 | -200    | 65800.0  | 2.000 | 0.700 |
| Ge <sub>0.98</sub> Mn <sub>0.01</sub> Sb <sub>0.01</sub> Te                                   | 498 | 73.55   | 262887.0 | 3.829 | 0.185 |
| Cu <sub>2.94</sub> Ag <sub>0.06</sub> SbSe <sub>4</sub>                                       | 548 | 372.00  | 5501.0   | 1.040 | 0.401 |
| Ge <sub>0.58</sub> Sb <sub>0.22</sub> Te <sub>0.8</sub> (AgSnSe <sub>2</sub> ) <sub>0.2</sub> | 523 | 206.21  | 34800.0  | 0.690 | 1.134 |
| BiSbSe <sub>2.88</sub> Cl <sub>0.12</sub>                                                     | 400 | -195.00 | 6740.0   | 0.520 | 0.197 |
| Li <sub>0.02</sub> Cu <sub>1.85</sub> Se                                                      | 784 | 76.36   | 166346.0 | 2.970 | 0.256 |
| FeNb <sub>0.86</sub> Hf <sub>0.14</sub> Sb                                                    | 600 | 145.63  | 279845.0 | 5.305 | 0.671 |
| Ca <sub>0.99</sub> Yb <sub>4.01</sub> Al <sub>2</sub> Sb <sub>5.84</sub> Ge <sub>0.16</sub>   | 661 | 159.35  | 3785.0   | 1.020 | 0.090 |
| Cu <sub>2.2</sub> Sn <sub>0.8</sub> Sb <sub>0.2</sub> Se <sub>3.2</sub>                       | 300 | 46.86   | 217574.0 | 3.487 | 0.041 |
| Li <sub>0.03</sub> Cu <sub>1.81</sub> Bi <sub>0.04</sub> Se                                   | 303 | 57.00   | 96552.0  | 1.071 | 0.089 |
| La <sub>0.3</sub> Co <sub>4</sub> Sb <sub>12</sub>                                            | 373 | 67.00   | 25735.0  | 3.850 | 0.011 |
| SnS <sub>0.88</sub> Se <sub>0.12</sub>                                                        | 723 | 377.00  | 8150.0   | 0.990 | 0.830 |
| CrSe <sub>3</sub>                                                                             | 300 | 89.43   | 40679.0  | 1.803 | 0.054 |
| Sn <sub>0.975</sub> Pb <sub>0.01</sub> Cd <sub>0.015</sub> Se                                 | 300 | 312.90  | 1587.0   | 1.237 | 0.038 |
| Cu <sub>22</sub> Sn <sub>10</sub> S <sub>32</sub>                                             | 500 | 71.97   | 157205.0 | 2.640 | 0.154 |
| Cu <sub>2</sub> SnSe <sub>3</sub>                                                             | 600 | 148.48  | 13697.0  | 0.898 | 0.202 |
| Bi <sub>0.825</sub> Ba <sub>0.175</sub> CuSeO                                                 | 420 | 162.82  | 19519.0  | 0.682 | 0.437 |
| GeSe <sub>0.55</sub> Te <sub>0.45</sub>                                                       | 320 | 50.08   | 222761.0 | 2.738 | 0.065 |
| Cu <sub>2</sub> Se <sub>0.98</sub> S <sub>0.02</sub>                                          | 303 | 85.86   | 124627.0 | 0.902 | 0.309 |
| Bi <sub>0.48</sub> Sb <sub>1.52</sub> Te <sub>3</sub>                                         | 500 | 181.20  | 35570.0  | 2.086 | 0.266 |
| In <sub>0.30</sub> Co <sub>4</sub> Sb <sub>11.90</sub>                                        | 800 | -233    | 77000.0  | 1.600 | 1.200 |
| Sn <sub>0.975</sub> Pb <sub>0.01</sub> Cd <sub>0.015</sub> Se                                 | 573 | 400.00  | 1746.0   | 0.624 | 0.257 |
| (CaZn <sub>0.4</sub> Ag <sub>0.2</sub> Sb) <sub>0.87</sub> (LiZnSb) <sub>0.13</sub>           | 873 | 180.23  | 23933.0  | 0.539 | 1.258 |
| Cu <sub>2</sub> Se <sub>0.9</sub> S <sub>0.1</sub>                                            | 613 | 144.00  | 42170.0  | 0.555 | 0.966 |
| LiGe <sub>11.5</sub> Sb <sub>2</sub> Te <sub>15</sub>                                         | 573 | 249.50  | 46070.0  | 1.366 | 1.203 |

|                                                                                             |     |         |          |       |       |
|---------------------------------------------------------------------------------------------|-----|---------|----------|-------|-------|
| AgBi <sub>0.7</sub> Sb <sub>0.3</sub> Se <sub>2</sub>                                       | 576 | -275.00 | 2371.0   | 0.395 | 0.262 |
| Ag <sub>0.97</sub> Cr <sub>0.97</sub> Bi <sub>0.03</sub> Se <sub>2</sub>                    | 303 | 77.55   | 24870.0  | 0.494 | 0.092 |
| Mg <sub>0.95</sub> Li <sub>0.05</sub> Ge <sub>0.9</sub> Si <sub>0.1</sub>                   | 600 | 294.30  | 14308.0  | 2.633 | 0.282 |
| Ti <sub>0.97</sub> Mn <sub>0.03</sub> NiSn <sub>0.97</sub> Sb <sub>0.03</sub>               | 871 | -143.00 | 139800.0 | 5.543 | 0.449 |
| Cu <sub>5</sub> SnSbSe <sub>6.58</sub>                                                      | 300 | 30.34   | 336207.0 | 4.171 | 0.022 |
| Ag <sub>0.97</sub> Cr <sub>0.95</sub> Sb <sub>0.05</sub> Se <sub>2</sub>                    | 753 | 200.00  | 6743.0   | 0.503 | 0.404 |
| Rb <sub>7.88</sub> Au <sub>2.47</sub> Ge <sub>43.53</sub>                                   | 150 | -8.06   | 296.0    | 1.692 | 0.000 |
| (SnTe) <sub>40</sub> Sb <sub>2</sub> Te <sub>3</sub>                                        | 323 | 35.43   | 392357.0 | 5.535 | 0.029 |
| Ca <sub>9</sub> Yb <sub>2</sub> Sb <sub>7</sub> Ge <sub>3</sub>                             | 513 | 64.40   | 206.0    | 1.000 | 0.000 |
| Pb <sub>0.99</sub> Tl <sub>0.01</sub> Te                                                    | 798 | 276.80  | 20541.0  | 0.871 | 1.442 |
| Ge <sub>0.96</sub> Mn <sub>0.02</sub> Sb <sub>0.02</sub> Te                                 | 398 | 77.10   | 242268.0 | 3.775 | 0.152 |
| BaTmCo <sub>4</sub> O <sub>7</sub>                                                          | 368 | 130.00  | 108.0    | 0.557 | 0.001 |
| Er <sub>0.03</sub> (Bi <sub>0.23</sub> Sb <sub>0.77</sub> ) <sub>1.97</sub> Te <sub>3</sub> | 350 | 235.73  | 50322.0  | 0.824 | 1.187 |
| Nd <sub>2.92</sub> Te <sub>4</sub>                                                          | 573 | -49.40  | 163640.0 | 2.743 | 0.083 |
| In <sub>4</sub> Pb <sub>0.01</sub> Sn <sub>0.03</sub> Se <sub>2.9</sub> Cl <sub>0.02</sub>  | 623 | -260.00 | 14800.0  | 0.592 | 1.053 |
| AgBiSe <sub>2.12</sub>                                                                      | 400 | 642.00  | 123.0    | 0.644 | 0.031 |
| AgCuTe <sub>0.7</sub> Se <sub>0.3</sub>                                                     | 723 | 254.27  | 10146.0  | 0.507 | 0.924 |
| CsNd <sub>2</sub> Ag <sub>3</sub> Te <sub>5</sub>                                           | 385 | 32.87   | 126.5    | 0.453 | 0.000 |
| (SnTe) <sub>20</sub> Sb <sub>2</sub> Te <sub>3</sub>                                        | 423 | 63.62   | 237197.0 | 3.980 | 0.102 |
| Li <sub>0.01</sub> Cu <sub>1.85</sub> Se                                                    | 502 | 33.38   | 365385.0 | 3.697 | 0.055 |
| (Cu <sub>0.002</sub> Pb <sub>0.998</sub> Te)(MnTe) <sub>0.03</sub>                          | 623 | -169.30 | 73931.0  | 1.464 | 0.902 |
| Ca <sub>5</sub> Ga <sub>1.8</sub> Zn <sub>0.2</sub> Sb <sub>6</sub>                         | 724 | 104.62  | 37650.0  | 1.307 | 0.228 |
| AgSb <sub>0.93</sub> Mn <sub>0.07</sub> Te <sub>2</sub>                                     | 394 | 88.35   | 99865.0  | 1.155 | 0.266 |
| Ca <sub>5</sub> In <sub>1.98</sub> Zn <sub>0.02</sub> Sb <sub>6</sub>                       | 422 | 263.70  | 5418.0   | 0.933 | 0.164 |
| Mg <sub>3.5</sub> Gd <sub>0.045</sub> Sb <sub>2</sub>                                       | 700 | -271.48 | 14631.0  | 0.763 | 0.989 |
| Bi <sub>0.9</sub> Ag <sub>0.1</sub> CuSeO                                                   | 773 | 325.70  | 2200.0   | 0.450 | 0.401 |
| Ge <sub>0.87</sub> Mn <sub>0.05</sub> Sb <sub>0.08</sub> Te                                 | 298 | 92.58   | 114433.0 | 2.010 | 0.145 |
| SnS <sub>0.88</sub> Se <sub>0.12</sub>                                                      | 423 | 213.00  | 54487.0  | 1.820 | 0.575 |
| ZrNiPb <sub>0.993</sub> Bi <sub>0.007</sub>                                                 | 673 | -213.47 | 102872.0 | 6.215 | 0.505 |
| Bi <sub>2.0</sub> S <sub>3.0</sub>                                                          | 423 | -641.00 | 33.5     | 0.576 | 0.010 |
| Ca <sub>0.99</sub> Yb <sub>4.01</sub> Al <sub>2</sub> Sb <sub>5.84</sub> Ge <sub>0.16</sub> | 613 | 183.64  | 3084.0   | 1.000 | 0.064 |
| Cu <sub>2</sub> Se <sub>0.96</sub> I <sub>0.04</sub>                                        | 400 | 112.00  | 41410.0  | 0.788 | 0.264 |
| CuGa <sub>0.99</sub> Mn <sub>0.01</sub> Te <sub>2</sub>                                     | 575 | 346.20  | 8070.0   | 2.262 | 0.246 |
| Sr <sub>0.40</sub> Co <sub>4</sub> Sb <sub>12.54</sub>                                      | 300 | -52     | 422000.0 | 2.900 | 0.100 |
| (Cu <sub>0.002</sub> Pb <sub>0.998</sub> Te)(MnTe) <sub>0.03</sub>                          | 823 | -206.84 | 37655.0  | 1.213 | 1.093 |
| Cu <sub>2.88</sub> Ag <sub>0.12</sub> SbSe <sub>4</sub>                                     | 373 | 369.00  | 10316.0  | 1.490 | 0.352 |
| Cu <sub>2</sub> Se <sub>0.96</sub> I <sub>0.04</sub>                                        | 450 | 129.00  | 36963.0  | 0.790 | 0.350 |
| Mg <sub>3.5</sub> Ho <sub>0.03</sub> Sb <sub>2</sub>                                        | 500 | -258.20 | 13030.0  | 0.921 | 0.471 |
| ZrNiSn <sub>0.99</sub> Sb <sub>0.01</sub>                                                   | 874 | -205.70 | 125910.0 | 4.480 | 0.770 |
| Ag <sub>0.97</sub> Cr <sub>0.95</sub> Bi <sub>0.05</sub> Se <sub>2</sub>                    | 503 | 115.68  | 12020.0  | 0.470 | 0.172 |
| AgSn <sub>5.0</sub> BiTe <sub>7.0</sub>                                                     | 600 | 132.45  | 73070.0  | 2.130 | 0.361 |

|                                                                                                          |      |         |          |       |       |
|----------------------------------------------------------------------------------------------------------|------|---------|----------|-------|-------|
| Cu <sub>11.8</sub> Gd <sub>0.2</sub> Sb <sub>4</sub> S <sub>13</sub>                                     | 525  | 103.52  | 102008.0 | 1.446 | 0.397 |
| Tl <sub>0.8</sub> Co <sub>4</sub> SnSb <sub>11</sub>                                                     | 250  | 14.86   | 90990.0  | 2.260 | 0.002 |
| Ta <sub>0.94</sub> Ti <sub>0.06</sub> FeSb                                                               | 670  | 222.40  | 93500.0  | 4.667 | 0.669 |
| Ba <sub>8</sub> Cu <sub>5.18</sub> Si <sub>9.98</sub> Ge <sub>30.85</sub>                                | 514  | -111.34 | 60944.0  | 1.654 | 0.235 |
| Bi <sub>1.2</sub> Sb <sub>0.8</sub> Se <sub>2.82</sub> Cl <sub>0.18</sub>                                | 500  | -144.00 | 22044.0  | 0.710 | 0.322 |
| GeSe <sub>0.7</sub> Te <sub>0.3</sub>                                                                    | 728  | 100.69  | 72201.0  | 1.750 | 0.305 |
| BiSb(Se <sub>0.92</sub> Br <sub>0.08</sub> ) <sub>3</sub>                                                | 700  | -193.00 | 17925.0  | 0.500 | 0.940 |
| SnTe <sub>0.2</sub> AgSbSe <sub>2</sub>                                                                  | 400  | 83.59   | 106711.0 | 1.270 | 0.284 |
| Cu <sub>5</sub> SnSbSe <sub>6.79</sub>                                                                   | 300  | 30.34   | 443478.0 | 4.724 | 0.026 |
| Li <sub>1.01</sub> Co <sub>0.85</sub> Ni <sub>0.15</sub> O <sub>2</sub>                                  | 823  | 303.00  | 68.0     | 0.915 | 0.006 |
| Cu <sub>22</sub> Sn <sub>10</sub> S <sub>32</sub>                                                        | 700  | 97.05   | 100840.0 | 2.035 | 0.327 |
| Bi <sub>0.88</sub> Pb <sub>0.06</sub> Yb <sub>0.06</sub> CuSeO                                           | 347  | 117.00  | 38400.0  | 0.650 | 0.281 |
| Mg <sub>3.5</sub> Ho <sub>0.04</sub> Sb <sub>1.97</sub> Te <sub>0.03</sub>                               | 500  | -237.00 | 21450.0  | 0.911 | 0.661 |
| Cu <sub>26</sub> Ti <sub>2</sub> Sb <sub>3</sub> Ge <sub>3</sub> S <sub>32</sub>                         | 308  | 67.01   | 158333.0 | 1.995 | 0.110 |
| Bi <sub>2.0</sub> S <sub>2.91</sub> Se <sub>0.09</sub>                                                   | 723  | -475.00 | 470.0    | 0.520 | 0.148 |
| Bi <sub>0.875</sub> Ba <sub>0.125</sub> CuSeO                                                            | 825  | 200.64  | 8702.0   | 0.691 | 0.554 |
| Bi <sub>0.985</sub> Na <sub>0.015</sub> CuSeO                                                            | 300  | 253.50  | 12500.0  | 0.810 | 0.298 |
| Ag <sub>2</sub> Se                                                                                       | 377  | -90.00  | 267541.0 | 1.333 | 0.613 |
| Ag <sub>8</sub> Sn <sub>0.4</sub> Ga <sub>0.6</sub> Se <sub>6</sub>                                      | 573  | -323.83 | 660.0    | 0.283 | 0.120 |
| Ta <sub>0.96</sub> Ti <sub>0.04</sub> FeSb                                                               | 470  | 220.80  | 76039.0  | 5.703 | 0.308 |
| Cu <sub>2.94</sub> Ag <sub>0.06</sub> SbSe <sub>4</sub>                                                  | 598  | 355.00  | 6667.0   | 0.960 | 0.523 |
| K <sub>0.99</sub> Ba <sub>0.01</sub> GaSb <sub>4</sub>                                                   | 509  | -220.40 | 13266.0  | 0.700 | 0.469 |
| Sr <sub>14</sub> MgBi <sub>11</sub>                                                                      | 521  | 56.82   | 55725.0  | 1.328 | 0.071 |
| Mg <sub>2.975</sub> Na <sub>0.025</sub> Sb <sub>2</sub>                                                  | 323  | 75.00   | 36600.0  | 2.010 | 0.033 |
| Ba <sub>8.07</sub> Cu <sub>4.89</sub> Si <sub>41.03</sub>                                                | 417  | -54.30  | 150300.0 | 2.861 | 0.064 |
| LiCo <sub>0.96</sub> Ni <sub>0.04</sub> O <sub>2</sub>                                                   | 1023 | 544.83  | 96.1     | 1.614 | 0.018 |
| NbCoSn                                                                                                   | 779  | -228.82 | 37633.0  | 8.155 | 0.188 |
| Cu <sub>2</sub> Se                                                                                       | 672  | 94.00   | 151351.0 | 2.472 | 0.364 |
| (Cu <sub>3</sub> SnS <sub>4</sub> ) <sub>0.895</sub> (Ga <sub>2</sub> Te <sub>3</sub> ) <sub>0.105</sub> | 331  | 52.02   | 178473.0 | 2.951 | 0.054 |
| Ti <sub>0.99</sub> Al <sub>0.01</sub> O <sub>2</sub>                                                     | 296  | -414.77 | 1699.5   | 6.238 | 0.014 |
| AgCuTe                                                                                                   | 320  | 65.19   | 75588.0  | 1.072 | 0.093 |
| Ta <sub>0.88</sub> Ti <sub>0.12</sub> FeSb                                                               | 870  | 220.00  | 100200.0 | 3.828 | 1.102 |
| Ag(Bi <sub>0.9</sub> Pb <sub>0.1</sub> ) <sub>0.7</sub> Sb <sub>0.3</sub> Se <sub>2</sub>                | 576  | 370.27  | 702.0    | 0.591 | 0.094 |
| CasIn <sub>2</sub> Sb <sub>6</sub>                                                                       | 520  | 480.00  | 967.0    | 0.750 | 0.155 |
| Ag <sub>2.0</sub> Se <sub>0.8</sub> Te <sub>0.2</sub>                                                    | 375  | -127.60 | 101835.0 | 0.837 | 0.743 |
| Ba <sub>8.01</sub> Ga <sub>15.89</sub> Zn <sub>0.006</sub> Sn <sub>30.1</sub>                            | 340  | 355.28  | 13640.0  | 0.926 | 0.632 |
| Mg <sub>3</sub> Sb <sub>1.9</sub> Bi <sub>0.1</sub>                                                      | 470  | 340.00  | 500.0    | 0.980 | 0.028 |
| Ag <sub>0.03</sub> Cr <sub>1.97</sub> Se <sub>3</sub>                                                    | 619  | 154.30  | 26700.0  | 1.528 | 0.258 |
| Eu <sub>2</sub> Zn <sub>0.98</sub> Sb <sub>2</sub>                                                       | 823  | 216.00  | 12211.0  | 0.476 | 1.000 |
| Nb <sub>0.95</sub> Ta <sub>0.05</sub> CoSn <sub>0.9</sub> Sb <sub>0.1</sub>                              | 628  | -133.27 | 117021.0 | 4.766 | 0.274 |
| (Sn <sub>0.8</sub> Ge <sub>0.2</sub> ) <sub>0.94</sub> Mn <sub>0.06</sub> Te                             | 873  | 146.30  | 94350.0  | 1.875 | 0.940 |



|                                                                                                   |      |         |          |        |       |
|---------------------------------------------------------------------------------------------------|------|---------|----------|--------|-------|
| Cu <sub>2</sub> Zn <sub>0.4</sub> Fe <sub>0.6</sub> SnSe <sub>4</sub>                             | 673  | 231.20  | 6210.0   | 0.858  | 0.260 |
| Cu <sub>2.9</sub> Ag <sub>0.1</sub> ErTe <sub>3</sub>                                             | 300  | 41.70   | 233000.0 | 2.260  | 0.054 |
| As <sub>2</sub> Te <sub>2.6</sub> Se <sub>0.4</sub>                                               | 323  | 210.00  | 940.0    | 0.590  | 0.020 |
| Sr <sub>0.11</sub> Ba <sub>0.18</sub> Co <sub>4</sub> Sb <sub>12.09</sub>                         | 800  | -161.00 | 213636.0 | 3.930  | 1.127 |
| Co <sub>9</sub> S <sub>8</sub>                                                                    | 66   | -1.50   | 17339800 | 29.050 | 0.000 |
| Ge <sub>0.98</sub> Mn <sub>0.01</sub> Sb <sub>0.01</sub> Te                                       | 398  | 51.61   | 383505.0 | 5.187  | 0.078 |
| Ag(Bi <sub>0.85</sub> Nb <sub>0.15</sub> ) <sub>0.7</sub> Sb <sub>0.3</sub> Se <sub>2</sub>       | 526  | -231.00 | 4467.0   | 0.651  | 0.193 |
| Ba <sub>0.15</sub> In <sub>0.16</sub> Co <sub>4</sub> Sb <sub>11.83</sub>                         | 850  | -200    | 98900.0  | 0.900  | 1.300 |
| Mg <sub>3.5</sub> Gd <sub>0.035</sub> Sb <sub>2</sub>                                             | 400  | -207.50 | 20665.0  | 1.043  | 0.341 |
| Bi <sub>0.8</sub> Pb <sub>0.1</sub> Yb <sub>0.1</sub> CuSeO                                       | 640  | 137.17  | 12308.0  | 0.563  | 0.263 |
| Ca <sub>6</sub> Yb <sub>5</sub> Sb <sub>10</sub>                                                  | 419  | 8.30    | 51429.0  | 1.222  | 0.001 |
| Ge <sub>0.55</sub> Pb <sub>0.45</sub> Te <sub>0.8</sub> Se <sub>0.2</sub>                         | 370  | 100.00  | 31915.0  | 0.996  | 0.119 |
| Ca <sub>5</sub> Ga <sub>1.9</sub> Zn <sub>0.1</sub> Sb <sub>6</sub>                               | 724  | 151.16  | 24400.0  | 1.097  | 0.368 |
| Cu <sub>5</sub> Sn <sub>2</sub> S <sub>7</sub>                                                    | 627  | 68.75   | 159155.0 | 3.125  | 0.151 |
| Cu <sub>2</sub> Se <sub>0.96</sub> S <sub>0.04</sub>                                              | 372  | 117.76  | 66800.0  | 0.532  | 0.648 |
| TmCuTe <sub>2</sub>                                                                               | 457  | 102.60  | 66864.0  | 1.324  | 0.243 |
| Al <sub>0.005</sub> Sb <sub>0.1</sub> Ge <sub>0.895</sub> Te                                      | 573  | 223.00  | 54699.0  | 1.424  | 1.094 |
| (SnTe) <sub>10</sub> Sb <sub>2</sub> Te <sub>3</sub>                                              | 773  | 177.44  | 77100.0  | 1.760  | 1.066 |
| Se <sub>0.2</sub> Co <sub>4</sub> Sb <sub>11.6</sub> Se <sub>0.4</sub>                            | 300  | -262    | 9400.0   | 2.100  | 0.100 |
| Cu <sub>0.995</sub> Pd <sub>0.005</sub> FeS <sub>2</sub>                                          | 30   | -419.85 | 7.3      | 50.000 | 0.000 |
| Ba <sub>8</sub> Cu <sub>5.04</sub> Si <sub>13.01</sub> Ge <sub>27.96</sub>                        | 417  | -83.00  | 80226.0  | 1.873  | 0.122 |
| Nd <sub>2.9</sub> Te <sub>4</sub>                                                                 | 573  | -56.90  | 138400.0 | 2.471  | 0.094 |
| Sr <sub>0.21</sub> Yb <sub>0.03</sub> Co <sub>4</sub> Sb <sub>12.12</sub>                         | 800  | -177.00 | 180000.0 | 3.670  | 1.229 |
| Bi <sub>2.0</sub> S <sub>2.85</sub> Se <sub>0.15</sub>                                            | 323  | -439.00 | 938.0    | 0.770  | 0.076 |
| Zn <sub>0.9</sub> Cd <sub>0.1</sub> Sc <sub>0.03</sub> O <sub>1.045</sub>                         | 1073 | -150.00 | 27350.0  | 3.020  | 0.219 |
| Ti <sub>0.5</sub> Zr <sub>0.25</sub> Hf <sub>0.25</sub> NiSn <sub>0.998</sub> Sb <sub>0.002</sub> | 373  | -215.80 | 51520.0  | 2.880  | 0.260 |
| BiCu <sub>0.975</sub> SeO                                                                         | 723  | 241.67  | 3625.0   | 0.464  | 0.330 |
| In <sub>0.005</sub> Pb <sub>0.995</sub> Te <sub>0.999</sub> I <sub>0.001</sub>                    | 533  | -269.40 | 14150.0  | 1.380  | 0.400 |
| Ca <sub>14</sub> MgSb <sub>11</sub>                                                               | 800  | 150.00  | 6818.0   | 0.693  | 0.177 |
| Al <sub>0.02</sub> Ge <sub>0.98</sub> Te                                                          | 373  | 47.68   | 503571.0 | 6.141  | 0.070 |
| NbCoSn <sub>0.9</sub> Sb <sub>0.1</sub>                                                           | 302  | -85.60  | 275830.0 | 7.640  | 0.070 |
| Bi <sub>0.94</sub> Ag <sub>0.06</sub> CuSeO                                                       | 573  | 296.70  | 1649.0   | 0.480  | 0.173 |
| As <sub>2</sub> Te <sub>3</sub>                                                                   | 523  | 5.94    | 1637.9   | 0.684  | 0.000 |
| S <sub>0.02</sub> Pd <sub>0.20</sub> Co <sub>3.80</sub> Sb <sub>12.06</sub>                       | 700  | -233    | 71600.0  | 2.500  | 0.800 |
| Bi <sub>0.96</sub> Ag <sub>0.04</sub> CuSeO                                                       | 723  | 313.30  | 2360.0   | 0.490  | 0.342 |
| As <sub>2</sub> Te <sub>1.5</sub> Se <sub>1.5</sub>                                               | 298  | 529.29  | 5.4      | 0.370  | 0.001 |
| YbCd <sub>1.3</sub> Zn <sub>0.7</sub> Sb <sub>2</sub>                                             | 450  | 136.29  | 79253.0  | 1.397  | 0.474 |
| Ag <sub>0.8</sub> Sb <sub>0.8</sub> Pb <sub>18.3</sub> Te <sub>20.0</sub>                         | 573  | -273.60 | 12228.0  | 0.735  | 0.714 |
| BiSb(Se <sub>0.96</sub> Br <sub>0.04</sub> ) <sub>3</sub>                                         | 700  | -213.00 | 13298.0  | 0.500  | 0.845 |
| Cu <sub>5</sub> SnSbSe <sub>6.58</sub>                                                            | 473  | 45.52   | 246552.0 | 3.624  | 0.067 |
| (CaZn <sub>0.4</sub> Ag <sub>0.2</sub> Sb) <sub>0.87</sub> (LiZnSb) <sub>0.13</sub>               | 472  | 147.10  | 34301.0  | 0.693  | 0.505 |

|                                                                               |      |         |          |       |       |
|-------------------------------------------------------------------------------|------|---------|----------|-------|-------|
| Mg <sub>3.5</sub> Hf <sub>0.03</sub> Sb <sub>2</sub>                          | 700  | -304.20 | 8261.0   | 0.735 | 0.728 |
| Cu <sub>2.82</sub> Ag <sub>0.18</sub> SbSe <sub>4</sub>                       | 323  | 336.00  | 10316.0  | 1.540 | 0.250 |
| Mg <sub>0.97</sub> Li <sub>0.03</sub> Ge <sub>0.9</sub> Si <sub>0.1</sub>     | 600  | 253.36  | 28615.0  | 2.810 | 0.392 |
| Ti <sub>0.25</sub> Hf <sub>0.75</sub> CoSb <sub>0.85</sub> Sn <sub>0.15</sub> | 391  | 196.10  | 65920.0  | 2.980 | 0.290 |
| Ba <sub>8.04</sub> Cu <sub>4.99</sub> Si <sub>18</sub> Ge <sub>22.98</sub>    | 663  | -147.00 | 25100.0  | 1.649 | 0.218 |
| GeSe <sub>0.5</sub> Te <sub>0.5</sub>                                         | 430  | 66.04   | 196667.0 | 2.646 | 0.139 |
| Ca <sub>3</sub> Co <sub>4</sub> O <sub>9</sub>                                | 1000 | 202.00  | 7500.0   | 2.210 | 0.129 |
| (SnTe) <sub>25</sub> Sb <sub>2</sub> Te <sub>3</sub>                          | 723  | 150.00  | 115190.0 | 2.310 | 0.680 |
| Cu <sub>2.075</sub> Sn <sub>0.925</sub> S <sub>3</sub>                        | 600  | 75.21   | 179104.0 | 2.860 | 0.213 |
| Ca <sub>5</sub> Ga <sub>1.95</sub> Zn <sub>0.05</sub> Sb <sub>6</sub>         | 525  | 160.40  | 17200.0  | 1.064 | 0.214 |
| GeTe                                                                          | 773  | 159.00  | 185500.0 | 3.030 | 1.172 |
| Ge <sub>0.98</sub> Mn <sub>0.02</sub> Te                                      | 398  | 51.60   | 377320.0 | 5.134 | 0.078 |
| LaCoO <sub>3</sub>                                                            | 300  | 600.00  | 64.0     | 0.434 | 0.015 |
| Sb <sub>0.15</sub> Ge <sub>0.85</sub> Te                                      | 373  | 185.93  | 20642.0  | 1.255 | 0.212 |
| SnSe <sub>0.9</sub> S <sub>0.1</sub>                                          | 473  | 261.32  | 2348.0   | 0.925 | 0.070 |
| Ba <sub>8.03</sub> Cu <sub>5</sub> Ge <sub>40.97</sub>                        | 711  | -167.00 | 28630.0  | 1.320 | 0.430 |
| Se <sub>0.15</sub> Co <sub>4</sub> Sb <sub>11.7</sub> Se <sub>0.3</sub>       | 800  | -214    | 20300.0  | 2.200 | 0.300 |
| Ca <sub>6</sub> Yb <sub>5</sub> Sb <sub>10</sub>                              | 608  | 14.22   | 48571.0  | 1.550 | 0.004 |
| Eu <sub>0.27</sub> Co <sub>4</sub> Sb <sub>12</sub>                           | 300  | -87     | 309600.0 | 2.300 | 0.200 |
| Mg <sub>3.5</sub> Gd <sub>0.04</sub> Sb <sub>1.97</sub> Te <sub>0.03</sub>    | 300  | -183.21 | 20045.0  | 0.946 | 0.213 |
| NbCo <sub>0.95</sub> Pt <sub>0.05</sub> Sn                                    | 770  | -198.70 | 84560.0  | 3.260 | 0.590 |
| (Zn <sub>0.9</sub> In <sub>0.1</sub> ) <sub>4</sub> Sb <sub>3</sub>           | 323  | 156.30  | 13216.0  | 0.887 | 0.118 |
| Rb <sub>2</sub> Bi <sub>8</sub> Se <sub>13</sub>                              | 428  | -287.30 | 1180.0   | 0.455 | 0.092 |
| Tl <sub>9.0</sub> Bi <sub>0.98</sub> Te <sub>6.0</sub>                        | 325  | 164.46  | 25800.0  | 0.538 | 0.422 |
| Yb <sub>0.12</sub> Co <sub>4</sub> Sb <sub>12.11</sub>                        | 300  | -146    | 76500.0  | 2.200 | 0.200 |
| Sn <sub>0.91</sub> Mn <sub>0.08</sub> Bi <sub>0.01</sub> Te                   | 373  | 59.50   | 297000.0 | 4.226 | 0.093 |
| Yb <sub>0.3</sub> Co <sub>4</sub> Sb <sub>12</sub>                            | 823  | -199    | 111000.0 | 1.700 | 1.100 |
| Sr <sub>0.16</sub> Yb <sub>0.03</sub> Co <sub>4</sub> Sb <sub>11.82</sub>     | 500  | -154.00 | 210455.0 | 3.500 | 0.713 |
| Cu <sub>2</sub> Zn <sub>0.8</sub> Fe <sub>0.2</sub> SnSe <sub>4</sub>         | 673  | 339.37  | 1734.0   | 0.807 | 0.167 |
| Ba <sub>8.04</sub> Cu <sub>4.99</sub> Si <sub>18</sub> Ge <sub>22.98</sub>    | 760  | -116.60 | 27550.0  | 1.870 | 0.152 |
| Ag <sub>2</sub> Se <sub>1.04</sub>                                            | 334  | -141.91 | 116066.0 | 1.020 | 0.765 |
| Sn <sub>1.03</sub> Te                                                         | 823  | 149.00  | 70200.0  | 2.860 | 0.448 |
| AgSbTe <sub>2</sub>                                                           | 488  | 152.70  | 35200.0  | 1.053 | 0.380 |
| Ag <sub>2</sub> Se <sub>1.0025</sub>                                          | 376  | -124.26 | 167213.0 | 1.090 | 0.890 |
| Cu <sub>7</sub> P(S <sub>0.75</sub> Se <sub>0.25</sub> ) <sub>6</sub>         | 523  | 298.22  | 1306.0   | 0.216 | 0.282 |
| Ag <sub>0.97</sub> Cr <sub>0.97</sub> Sb <sub>0.03</sub> Se <sub>2</sub>      | 503  | 111.00  | 17091.0  | 0.448 | 0.236 |
| AgBi <sub>0.9</sub> Sb <sub>0.1</sub> Se <sub>2</sub>                         | 326  | -127.78 | 14962.0  | 0.496 | 0.161 |
| YbCd <sub>1.2</sub> Zn <sub>0.8</sub> Sb <sub>2</sub>                         | 350  | 89.28   | 125000.0 | 1.670 | 0.220 |
| Cu <sub>2</sub> Se                                                            | 350  | 101.48  | 87320.0  | 0.800 | 0.393 |
| As <sub>2</sub> Te <sub>2</sub> Se                                            | 423  | 246.46  | 44.9     | 0.413 | 0.003 |
| Nb <sub>0.9</sub> Ta <sub>0.1</sub> CoSn <sub>0.9</sub> Sb <sub>0.1</sub>     | 728  | -150.86 | 101135.0 | 4.351 | 0.385 |

|                                                                                             |     |         |          |        |       |
|---------------------------------------------------------------------------------------------|-----|---------|----------|--------|-------|
| Cu <sub>3</sub> SbS <sub>4</sub>                                                            | 573 | 584.60  | 378.0    | 0.779  | 0.095 |
| Sn <sub>0.96</sub> Pb <sub>0.03</sub> Zn <sub>0.01</sub> Se                                 | 373 | 476.00  | 2140.0   | 0.851  | 0.213 |
| Ba <sub>0.08</sub> Yb <sub>0.09</sub> Co <sub>4</sub> Sb <sub>12</sub>                      | 300 | -126.20 | 206600.0 | 2.510  | 0.380 |
| CuMo <sub>6</sub> Te <sub>8</sub>                                                           | 700 | 18.48   | 174048.0 | 3.945  | 0.011 |
| Sn <sub>0.97</sub> Pb <sub>0.01</sub> Cd <sub>0.025</sub> Se                                | 873 | 315.00  | 6857.0   | 0.477  | 1.245 |
| Bi <sub>0.98</sub> Pb <sub>0.02</sub> CuSeO                                                 | 150 | 128.87  | 51795.0  | 2.102  | 0.061 |
| Mg <sub>3.5</sub> Gd <sub>0.035</sub> Sb <sub>2</sub>                                       | 600 | -254.58 | 14931.0  | 0.815  | 0.712 |
| Tl <sub>9.0</sub> Bi <sub>0.99</sub> Te <sub>6.0</sub>                                      | 325 | 183.47  | 24636.0  | 0.486  | 0.555 |
| Ge <sub>0.98</sub> Mn <sub>0.02</sub> Te                                                    | 648 | 130.65  | 148454.0 | 2.706  | 0.607 |
| NbCoSn <sub>0.9</sub> Sb <sub>0.1</sub>                                                     | 826 | -153.27 | 99858.0  | 4.771  | 0.406 |
| NbCo <sub>0.98</sub> Ni <sub>0.02</sub> Sn                                                  | 498 | -147.06 | 70476.0  | 9.238  | 0.082 |
| Cu <sub>3</sub> Sb <sub>0.90</sub> Ge <sub>0.10</sub> S <sub>4</sub>                        | 323 | 91.20   | 123060.0 | 3.995  | 0.083 |
| Li <sub>2</sub> Ge <sub>3</sub> Sb <sub>2</sub> Te <sub>7</sub>                             | 373 | 270.00  | 16670.0  | 0.803  | 0.564 |
| Ge <sub>0.96</sub> Mn <sub>0.02</sub> Sb <sub>0.02</sub> Te                                 | 648 | 186.04  | 100000.0 | 1.808  | 1.241 |
| Nb <sub>0.8</sub> Ta <sub>0.2</sub> CoSn <sub>0.9</sub> Sb <sub>0.1</sub>                   | 826 | -165.14 | 82411.0  | 4.000  | 0.464 |
| Cu <sub>2</sub> Se <sub>0.94</sub> S <sub>0.06</sub>                                        | 450 | 131.90  | 52188.0  | 0.860  | 0.475 |
| CsTb <sub>2</sub> Ag <sub>3</sub> Te <sub>5</sub>                                           | 687 | 192.60  | 621.0    | 0.384  | 0.041 |
| Cu <sub>3</sub> SbSe <sub>4</sub>                                                           | 300 | 380.00  | 4462.0   | 3.385  | 0.057 |
| Ge <sub>0.87</sub> In <sub>0.05</sub> Pb <sub>0.08</sub> Te                                 | 475 | 227.56  | 39860.0  | 1.113  | 0.881 |
| Cu <sub>1.9</sub> Ag <sub>0.1</sub> SnSe <sub>3</sub>                                       | 400 | 141.41  | 4439.0   | 0.968  | 0.037 |
| Cu <sub>2</sub> Se <sub>0.92</sub> S <sub>0.08</sub>                                        | 750 | 231.13  | 21337.0  | 0.694  | 1.232 |
| Ag <sub>0.97</sub> Cr <sub>0.97</sub> Sb <sub>0.03</sub> Se <sub>2</sub>                    | 753 | 172.44  | 12983.0  | 0.413  | 0.703 |
| (SnTe) <sub>0.94</sub> (CuSbTe <sub>2</sub> ) <sub>0.06</sub>                               | 818 | 158.40  | 91700.0  | 1.950  | 0.960 |
| Ba <sub>0.03</sub> Co <sub>4</sub> Sb <sub>12.05</sub>                                      | 800 | -161    | 37000.0  | 3.300  | 0.200 |
| FeNb <sub>0.96</sub> Ti <sub>0.04</sub> Sb                                                  | 700 | 255.00  | 66000.0  | 8.000  | 0.376 |
| CuFe <sub>0.98</sub> In <sub>0.02</sub> S <sub>2</sub>                                      | 300 | -358.20 | 4500.0   | 5.202  | 0.033 |
| (SnTe) <sub>8</sub> Sb <sub>2</sub> Te <sub>3</sub>                                         | 773 | 176.50  | 71800.0  | 1.830  | 0.945 |
| Cu <sub>2</sub> Zn <sub>0.6</sub> Fe <sub>0.4</sub> SnSe <sub>4</sub>                       | 573 | 322.25  | 980.2    | 1.284  | 0.045 |
| Cu <sub>5.133</sub> Sn <sub>1.866</sub> S <sub>6.65</sub> Cl <sub>0.35</sub>                | 667 | 115.06  | 68485.0  | 1.438  | 0.421 |
| Mg <sub>3.5</sub> Gd <sub>0.04</sub> Sb <sub>1.97</sub> Te <sub>0.03</sub>                  | 400 | -201.07 | 21143.0  | 0.843  | 0.406 |
| Pd <sub>0.20</sub> Co <sub>3.80</sub> Sb <sub>12.01</sub>                                   | 700 | -217    | 81200.0  | 3.000  | 0.600 |
| Cu <sub>26</sub> V <sub>2</sub> Ge <sub>3</sub> Sb <sub>3</sub> S <sub>32</sub>             | 400 | 138.89  | 48018.0  | 1.405  | 0.264 |
| Cu <sub>11</sub> ZnSb <sub>4</sub> S <sub>13</sub>                                          | 522 | 162.00  | 12604.0  | 0.468  | 0.369 |
| Cu <sub>0.995</sub> Pd <sub>0.005</sub> FeS <sub>2</sub>                                    | 50  | -488.55 | 62.6     | 37.840 | 0.000 |
| Hf <sub>0.9</sub> Ti <sub>0.1</sub> CoSb <sub>0.8</sub> Sn <sub>0.2</sub>                   | 885 | 216.00  | 56028.0  | 3.244  | 0.709 |
| Ba <sub>8.01</sub> Ga <sub>15.89</sub> Zn <sub>0.006</sub> Sn <sub>30.1</sub>               | 580 | 392.40  | 11500.0  | 1.247  | 0.824 |
| Ca <sub>3.46</sub> Yb <sub>1.35</sub> Pr <sub>0.19</sub> Al <sub>2</sub> Sb <sub>6</sub>    | 623 | -143.00 | 1380.0   | 1.270  | 0.014 |
| Ag(Bi <sub>0.85</sub> Pb <sub>0.15</sub> ) <sub>0.7</sub> Sb <sub>0.3</sub> Se <sub>2</sub> | 478 | 421.62  | 766.0    | 0.475  | 0.137 |
| Sn <sub>1.03</sub> Se <sub>0.12</sub> Te <sub>0.88</sub>                                    | 523 | 49.62   | 247500.0 | 3.654  | 0.087 |
| Sr <sub>0.11</sub> Ba <sub>0.18</sub> Co <sub>4</sub> Sb <sub>12.09</sub>                   | 400 | -115.00 | 334722.0 | 4.250  | 0.417 |
| Ag <sub>0.01</sub> Sn <sub>0.99</sub> Se                                                    | 418 | 336.75  | 1147.0   | 0.407  | 0.134 |

|                                                                                           |      |         |          |        |       |
|-------------------------------------------------------------------------------------------|------|---------|----------|--------|-------|
| Cu <sub>3</sub> Sb <sub>0.996</sub> In <sub>0.004</sub> Se <sub>4</sub>                   | 573  | 277.00  | 9107.0   | 1.133  | 0.353 |
| Ag <sub>0.04</sub> Cr <sub>1.96</sub> Se <sub>3</sub>                                     | 512  | 135.10  | 30200.0  | 1.487  | 0.190 |
| Zn <sub>0.875</sub> Cd <sub>0.125</sub> Sc <sub>0.02</sub> O <sub>1.03</sub>              | 1073 | -147.00 | 23000.0  | 2.850  | 0.187 |
| Cu <sub>5.133</sub> Sn <sub>1.866</sub> S <sub>6.3</sub> Cl <sub>0.7</sub>                | 426  | 76.42   | 87452.0  | 1.760  | 0.124 |
| Ba <sub>1.8</sub> Bi <sub>0.2</sub> CoRuO <sub>6</sub>                                    | 518  | 24.40   | 137180.0 | 1.320  | 0.033 |
| Al <sub>0.005</sub> Sb <sub>0.1</sub> Ge <sub>0.895</sub> Te                              | 823  | 234.76  | 58795.0  | 1.522  | 1.640 |
| In <sub>0.015</sub> Pb <sub>0.985</sub> Te <sub>0.994</sub> I <sub>0.006</sub>            | 637  | -219.50 | 22800.0  | 1.359  | 0.515 |
| Bi <sub>2.0</sub> S <sub>2.91</sub> Se <sub>0.09</sub>                                    | 623  | -518.00 | 373.0    | 0.550  | 0.113 |
| Bi <sub>0.95</sub> Ba <sub>0.05</sub> CuSeO                                               | 725  | 281.00  | 4175.0   | 0.625  | 0.382 |
| BiCuSeO                                                                                   | 923  | 419.00  | 1383.0   | 0.420  | 0.534 |
| Sn <sub>0.91</sub> Mn <sub>0.09</sub> Te <sub>0.99</sub> I <sub>0.01</sub>                | 867  | 214.43  | 56410.0  | 1.641  | 1.370 |
| ZrNiPb <sub>0.993</sub> Bi <sub>0.007</sub>                                               | 475  | -198.00 | 137000.0 | 7.521  | 0.339 |
| Yb <sub>14</sub> MnSb <sub>11</sub>                                                       | 325  | 53.00   | 47966.0  | 1.000  | 0.044 |
| Ag(Bi <sub>0.8</sub> Pb <sub>0.2</sub> ) <sub>0.7</sub> Sb <sub>0.3</sub> Se <sub>2</sub> | 576  | 251.35  | 1631.0   | 4.010  | 0.015 |
| Ca <sub>1.55</sub> Yb <sub>3.45</sub> Al <sub>2</sub> Sb <sub>6</sub>                     | 610  | 168.78  | 1796.0   | 0.883  | 0.035 |
| Pb <sub>0.98</sub> Zn <sub>0.035</sub> Te                                                 | 318  | -161.00 | 114276.0 | 2.590  | 0.358 |
| (Sn <sub>0.8</sub> Ge <sub>0.2</sub> ) <sub>0.88</sub> Mn <sub>0.12</sub> Te              | 773  | 130.00  | 107400.0 | 1.740  | 0.806 |
| NbCoSn                                                                                    | 879  | -228.53 | 35030.0  | 7.643  | 0.210 |
| Ba <sub>0.15</sub> Yb <sub>0.01</sub> Co <sub>4</sub> Sb <sub>12</sub>                    | 600  | -179.00 | 113000.0 | 3.624  | 0.599 |
| Bi <sub>0.825</sub> Ba <sub>0.175</sub> CuSeO                                             | 825  | 208.97  | 10577.0  | 0.553  | 0.782 |
| FeVSb                                                                                     | 400  | -210.00 | 104000.0 | 8.260  | 0.222 |
| TiNiSn                                                                                    | 630  | -151.00 | 80620.0  | 4.016  | 0.323 |
| Mg <sub>2</sub> Zn <sub>1.04</sub> Sb <sub>2</sub>                                        | 473  | 131.58  | 1391.0   | 0.644  | 0.018 |
| Ca <sub>3.46</sub> Yb <sub>1.35</sub> Pr <sub>0.19</sub> Al <sub>2</sub> Sb <sub>6</sub>  | 523  | -150.00 | 1104.0   | 1.325  | 0.010 |
| Sr <sub>14</sub> MgBi <sub>11</sub>                                                       | 817  | 106.59  | 51773.0  | 1.332  | 0.361 |
| Ge <sub>0.9</sub> Mn <sub>0.05</sub> Sb <sub>0.05</sub> Te                                | 698  | 198.40  | 79381.0  | 1.690  | 1.291 |
| Pb <sub>0.97</sub> Tl <sub>0.015</sub> Na <sub>0.015</sub> Te                             | 597  | 223.20  | 42792.0  | 1.144  | 1.112 |
| Cu <sub>2.94</sub> Ag <sub>0.06</sub> SbSe <sub>4</sub>                                   | 623  | 346.00  | 7273.0   | 0.930  | 0.590 |
| Mg <sub>3.5</sub> Gd <sub>0.04</sub> Sb <sub>1.97</sub> Te <sub>0.03</sub>                | 500  | -226.79 | 20147.0  | 0.788  | 0.658 |
| Ag <sub>0.94</sub> CuSe                                                                   | 694  | 220.40  | 14221.0  | 0.599  | 0.870 |
| Ti <sub>0.9</sub> Mn <sub>0.1</sub> NiSn <sub>0.9</sub> Sb <sub>0.1</sub>                 | 697  | -125.84 | 240397.0 | 5.651  | 0.470 |
| Zn <sub>0.9</sub> Cd <sub>0.1</sub> Sc <sub>0.03</sub> O <sub>1.045</sub>                 | 973  | -142.00 | 30000.0  | 3.303  | 0.178 |
| Ba <sub>0.16</sub> In <sub>0.12</sub> Co <sub>4</sub> Sb <sub>11.85</sub>                 | 850  | -194    | 97300.0  | 1.000  | 1.200 |
| Cu <sub>1.02</sub> Fe <sub>0.98</sub> S <sub>2</sub>                                      | 200  | -557.25 | 107.5    | 18.070 | 0.000 |
| (Cu <sub>0.005</sub> Pb <sub>0.995</sub> Te)(MnTe) <sub>0.03</sub>                        | 823  | -172.81 | 61918.0  | 1.475  | 1.030 |
| Sn <sub>0.975</sub> Pb <sub>0.01</sub> Cd <sub>0.015</sub> Se                             | 673  | 423.33  | 1428.6   | 0.522  | 0.330 |
| Sb <sub>0.1</sub> Ge <sub>0.9</sub> Te                                                    | 773  | 240.74  | 57798.0  | 1.550  | 1.626 |
| Sn <sub>0.91</sub> Mn <sub>0.09</sub> Te <sub>0.99</sub> I <sub>0.01</sub>                | 818  | 198.45  | 66154.0  | 1.796  | 1.187 |
| SnS                                                                                       | 800  | 548.00  | 300.0    | 0.700  | 0.103 |
| Bi <sub>1.94</sub> Nb <sub>0.06</sub> Te <sub>3</sub>                                     | 306  | -87.63  | 82157.0  | 0.882  | 0.219 |
| Ba <sub>8</sub> Ga <sub>15.88</sub> Zn <sub>0.007</sub> Sn <sub>30.12</sub>               | 540  | 396.48  | 12023.0  | 1.033  | 0.988 |

|                                                                                                                     |      |         |          |       |       |
|---------------------------------------------------------------------------------------------------------------------|------|---------|----------|-------|-------|
| Ag <sub>8</sub> SnSe <sub>6</sub>                                                                                   | 601  | -181.54 | 10693.0  | 0.363 | 0.583 |
| Cu <sub>1.975</sub> S <sub>0.5</sub> Se <sub>0.5</sub>                                                              | 375  | 108.38  | 15000.0  | 0.670 | 0.099 |
| Yb <sub>0.20</sub> Co <sub>4</sub> Sb <sub>12</sub>                                                                 | 850  | -208    | 97000.0  | 1.300 | 1.200 |
| Ag <sub>8</sub> Sn <sub>0.5</sub> Ga <sub>0.5</sub> Se <sub>6</sub>                                                 | 576  | -363.70 | 2000.0   | 0.270 | 0.540 |
| Sb <sub>0.15</sub> Ge <sub>0.85</sub> Te                                                                            | 323  | 159.26  | 22018.0  | 1.200 | 0.150 |
| Ag <sub>0.01</sub> Sn <sub>0.99</sub> Se <sub>0.65</sub> S <sub>0.35</sub>                                          | 666  | 443.16  | 364.0    | 0.190 | 0.251 |
| Zn <sub>0.95</sub> Cd <sub>0.05</sub> Sc <sub>0.02</sub> O <sub>1.03</sub>                                          | 473  | -86.00  | 17300.0  | 8.000 | 0.008 |
| Mg <sub>3.5</sub> Ho <sub>0.04</sub> Sb <sub>1.97</sub> Te <sub>0.03</sub>                                          | 700  | -265.50 | 16150.0  | 0.748 | 1.066 |
| Ag <sub>8</sub> Sn <sub>0.6</sub> Ga <sub>0.4</sub> Se <sub>6</sub>                                                 | 426  | -510.98 | 396.0    | 0.249 | 0.177 |
| Cu <sub>7</sub> P(S <sub>0.5</sub> Se <sub>0.5</sub> ) <sub>6</sub>                                                 | 523  | 250.40  | 2840.0   | 0.289 | 0.322 |
| Mg <sub>3.5</sub> Ho <sub>0.01</sub> Sb <sub>2</sub>                                                                | 700  | -317.48 | 2139.0   | 0.705 | 0.214 |
| Zn <sub>0.9</sub> Cd <sub>0.1</sub> Sc <sub>0.04</sub> O <sub>1.06</sub>                                            | 1073 | -160.50 | 23230.0  | 2.955 | 0.217 |
| Sn <sub>0.98</sub> In <sub>0.02</sub> Se                                                                            | 723  | 425.00  | 324.0    | 0.639 | 0.066 |
| Nb <sub>0.8</sub> CoSb                                                                                              | 1123 | -225.70 | 24940.0  | 1.920 | 0.620 |
| Li <sub>1.1</sub> Co <sub>0.85</sub> Ni <sub>0.15</sub> O <sub>2</sub>                                              | 723  | 293.00  | 100.0    | 2.186 | 0.003 |
| MgAgSb <sub>0.98</sub> In <sub>0.02</sub>                                                                           | 500  | 175.27  | 71171.0  | 1.447 | 0.792 |
| Zn <sub>0.96</sub> Al <sub>0.04</sub> O                                                                             | 473  | -75.00  | 54100.0  | 4.520 | 0.032 |
| Ge <sub>12</sub> Sb <sub>2</sub> Te <sub>15</sub>                                                                   | 473  | 215.54  | 30337.0  | 1.497 | 0.445 |
| Cu <sub>1.95</sub> S <sub>0.5</sub> Se <sub>0.5</sub>                                                               | 772  | 146.67  | 55990.0  | 1.265 | 0.735 |
| Cu <sub>2</sub> Se <sub>0.88</sub> S <sub>0.12</sub>                                                                | 450  | 150.66  | 31629.0  | 0.694 | 0.466 |
| Rb <sub>2</sub> Bi <sub>8</sub> Se <sub>13</sub>                                                                    | 625  | -281.00 | 1023.0   | 0.445 | 0.113 |
| Ca <sub>10</sub> ZnSb <sub>9</sub>                                                                                  | 573  | 61.20   | 41.9     | 0.581 | 0.000 |
| Ba <sub>0.05</sub> Yb <sub>0.09</sub> Co <sub>4</sub> Sb <sub>12.13</sub>                                           | 300  | -158    | 112600.0 | 2.000 | 0.300 |
| Ba <sub>0.14</sub> In <sub>0.23</sub> Co <sub>4</sub> Sb <sub>11.84</sub>                                           | 850  | -190    | 112000.0 | 0.700 | 1.300 |
| (SnTe) <sub>0.9</sub> (CuSbTe <sub>2</sub> ) <sub>0.1</sub>                                                         | 427  | 55.70   | 250100.0 | 3.615 | 0.092 |
| GeSe <sub>0.55</sub> Te <sub>0.45</sub>                                                                             | 776  | 132.78  | 107836.0 | 2.135 | 0.691 |
| LiCo <sub>0.92</sub> Ni <sub>0.08</sub> O <sub>2</sub>                                                              | 1023 | 509.50  | 119.5    | 1.400 | 0.023 |
| Mg <sub>0.95</sub> Li <sub>0.05</sub> Ge <sub>0.9</sub> Si <sub>0.1</sub>                                           | 675  | 286.30  | 17240.0  | 2.430 | 0.392 |
| Gd <sub>2</sub> Se <sub>2.92</sub>                                                                                  | 550  | -115.58 | 25380.0  | 1.400 | 0.133 |
| Ca <sub>2</sub> Yb <sub>9</sub> Sb <sub>9</sub> Ge                                                                  | 513  | 20.44   | 877.6    | 2.034 | 0.000 |
| Ba <sub>0.96</sub> K <sub>0.04</sub> Zn <sub>2</sub> As <sub>2</sub>                                                | 423  | 55.56   | 100000.0 | 2.407 | 0.054 |
| Nb <sub>0.75</sub> Ta <sub>0.25</sub> CoSn <sub>0.9</sub> Sb <sub>0.1</sub>                                         | 924  | -181.90 | 73475.0  | 3.557 | 0.632 |
| Cu <sub>1.99</sub> S <sub>0.5</sub> Se <sub>0.5</sub>                                                               | 772  | 243.23  | 12772.0  | 0.652 | 0.895 |
| Cu <sub>26</sub> Ti <sub>2</sub> Sb <sub>4</sub> Ge <sub>2</sub> S <sub>32</sub>                                    | 498  | 159.79  | 44882.0  | 1.026 | 0.556 |
| Bi <sub>0.94</sub> Ag <sub>0.06</sub> CuSeO                                                                         | 523  | 274.00  | 1580.0   | 0.492 | 0.126 |
| (CaZn <sub>0.4</sub> Ag <sub>0.2</sub> Sb) <sub>0.91</sub> (LiZnSb) <sub>0.09</sub>                                 | 472  | 143.96  | 34759.0  | 0.895 | 0.380 |
| (Ag <sub>0.15</sub> Sb <sub>0.15</sub> Sn <sub>0.7</sub> )(S <sub>0.15</sub> Se <sub>0.15</sub> Te <sub>0.7</sub> ) | 593  | 138.02  | 53271.0  | 1.068 | 0.564 |
| Ge <sub>0.96</sub> Mn <sub>0.02</sub> Sb <sub>0.02</sub> Te                                                         | 298  | 54.19   | 325773.0 | 4.545 | 0.063 |
| Cu <sub>1.6</sub> S                                                                                                 | 600  | 38.70   | 292308.0 | 4.332 | 0.061 |
| Ba <sub>0.03</sub> Co <sub>4</sub> Sb <sub>12</sub>                                                                 | 500  | -244.14 | 27660.0  | 4.075 | 0.202 |
| Sr <sub>0.17</sub> Co <sub>4</sub> Sb <sub>12.88</sub>                                                              | 300  | -129    | 135500.0 | 4.600 | 0.100 |

|                                                                               |      |         |          |       |       |
|-------------------------------------------------------------------------------|------|---------|----------|-------|-------|
| Ca <sub>5</sub> Ga <sub>1.95</sub> Zn <sub>0.05</sub> Sb <sub>6</sub>         | 624  | 172.80  | 16415.0  | 0.981 | 0.308 |
| Ag <sub>0.01</sub> Cr <sub>1.99</sub> Se <sub>3</sub>                         | 512  | 143.20  | 28600.0  | 1.607 | 0.187 |
| Cu <sub>3.0</sub> SbSe <sub>4</sub>                                           | 498  | 397.00  | 3820.0   | 1.300 | 0.231 |
| Rb <sub>2</sub> Bi <sub>8</sub> Se <sub>12.961</sub>                          | 330  | -186.00 | 11200.0  | 0.682 | 0.187 |
| Ga <sub>0.15</sub> Co <sub>4</sub> Sb <sub>11.925</sub> Ga <sub>0.075</sub>   | 600  | -291    | 25500.0  | 2.100 | 0.500 |
| Ca <sub>3</sub> Co <sub>3.7</sub> Ti <sub>0.3</sub> O <sub>9</sub>            | 300  | 178.20  | 4300.0   | 2.300 | 0.018 |
| Ag <sub>2</sub> Se                                                            | 474  | -94.33  | 126638.0 | 3.029 | 0.162 |
| Bi <sub>1.2</sub> Sb <sub>0.8</sub> Se <sub>2.76</sub> Cl <sub>0.24</sub>     | 400  | -115.00 | 31602.0  | 0.690 | 0.242 |
| NbCoSn                                                                        | 576  | -214.30 | 47550.0  | 9.310 | 0.135 |
| Ca <sub>3</sub> Al <sub>0.99</sub> Zn <sub>0.01</sub> Sb <sub>3</sub>         | 522  | 208.00  | 9711.0   | 1.070 | 0.187 |
| SnS <sub>0.97</sub> Se <sub>0.03</sub>                                        | 573  | 300.00  | 20200.0  | 1.490 | 0.687 |
| Cu <sub>2.2</sub> Se                                                          | 672  | 170.00  | 43300.0  | 1.050 | 0.801 |
| LiCo <sub>0.92</sub> Ni <sub>0.08</sub> O <sub>2</sub>                        | 723  | 776.71  | 3.3      | 1.409 | 0.001 |
| Nb <sub>0.8</sub> Ti <sub>0.2</sub> FeSb                                      | 1100 | 204.00  | 104840.0 | 2.680 | 1.090 |
| Yb <sub>13.6</sub> Ce <sub>0.363</sub> Mn <sub>0.99</sub> Sb <sub>11.05</sub> | 573  | 113.97  | 31077.0  | 0.862 | 0.268 |
| Sr <sub>14</sub> MgBi <sub>11</sub>                                           | 424  | 41.59   | 59592.0  | 1.266 | 0.035 |
| Ca <sub>2</sub> Yb <sub>9</sub> Sb <sub>9</sub> Ge                            | 701  | 21.10   | 885.6    | 2.332 | 0.000 |
| Ge <sub>0.99</sub> Te                                                         | 323  | 40.54   | 699510.0 | 5.700 | 0.065 |
| (SnTe) <sub>0.96</sub> (CuSbTe <sub>2</sub> ) <sub>0.04</sub>                 | 430  | 40.66   | 326803.0 | 5.031 | 0.046 |
| Ag <sub>2.0</sub> Se <sub>0.8</sub> Te <sub>0.2</sub>                         | 360  | -127.00 | 100825.0 | 0.818 | 0.716 |
| Li <sub>0.03</sub> Cu <sub>1.85</sub> Se                                      | 784  | 78.29   | 165385.0 | 2.478 | 0.321 |
| Cu <sub>2.8</sub> Sn <sub>0.2</sub> Sb <sub>0.8</sub> Se <sub>3.8</sub>       | 723  | 88.57   | 171808.0 | 3.034 | 0.321 |
| GeSe <sub>0.65</sub> Te <sub>0.35</sub>                                       | 678  | 40.00   | 89925.0  | 1.874 | 0.052 |
| Yb <sub>14</sub> MnSb <sub>11</sub>                                           | 925  | 151.00  | 23069.0  | 0.950 | 0.512 |
| Cu <sub>2.8</sub> Sn <sub>0.2</sub> Sb <sub>0.8</sub> Se <sub>3.8</sub>       | 300  | 36.00   | 429021.0 | 5.740 | 0.029 |
| Nd <sub>2.78</sub> Te <sub>4</sub>                                            | 973  | -190.00 | 28900.0  | 0.950 | 1.015 |
| Sn <sub>0.91</sub> Mn <sub>0.09</sub> Te <sub>0.97</sub> l <sub>0.03</sub>    | 424  | 78.35   | 186667.0 | 3.183 | 0.153 |
| Cu <sub>11.6</sub> Gd <sub>0.4</sub> Sb <sub>4</sub> S <sub>13</sub>          | 425  | 95.28   | 100000.0 | 1.326 | 0.291 |
| NbCo <sub>0.94</sub> Ni <sub>0.06</sub> Sn                                    | 594  | -80.59  | 142857.0 | 7.774 | 0.071 |
| Cu <sub>2</sub> SnS <sub>3</sub>                                              | 523  | 390.00  | 190.0    | 1.230 | 0.012 |
| Rb <sub>2</sub> Bi <sub>8</sub> Se <sub>12.974</sub> Cl <sub>0.026</sub>      | 823  | -151.00 | 15960.0  | 0.692 | 0.433 |
| LiCo <sub>0.96</sub> Ni <sub>0.04</sub> O <sub>2</sub>                        | 423  | 571.23  | 0.0      | 2.227 | 0.000 |
| Cu <sub>2</sub> Se                                                            | 353  | 96.05   | 100000.0 | 0.908 | 0.359 |
| BaGd <sub>2</sub> NiO <sub>5</sub>                                            | 638  | 453.68  | 15.9     | 1.802 | 0.001 |
| In <sub>4</sub> Se <sub>2.32</sub> Cl <sub>0.03</sub>                         | 473  | -256.60 | 19471.0  | 0.907 | 0.669 |
| CuAgTe <sub>0.5</sub> Se <sub>0.5</sub>                                       | 303  | 147.87  | 10703.0  | 0.467 | 0.152 |
| Cu <sub>2</sub> Se <sub>0.96</sub> S <sub>0.04</sub>                          | 303  | 88.82   | 121014.0 | 0.872 | 0.332 |
| Ca <sub>3</sub> Al <sub>0.95</sub> Zn <sub>0.05</sub> Sb <sub>3</sub>         | 522  | 214.40  | 5050.0   | 0.922 | 0.129 |
| Cu <sub>2</sub> Sn <sub>0.95</sub> Zn <sub>0.05</sub> S <sub>3</sub>          | 323  | 98.50   | 18500.0  | 1.588 | 0.037 |
| GeSe <sub>0.75</sub> Te <sub>0.25</sub>                                       | 530  | 26.51   | 64552.0  | 1.515 | 0.016 |
| Tl <sub>9.0</sub> Bi <sub>0.99</sub> Te <sub>6.0</sub>                        | 443  | 237.20  | 14000.0  | 0.409 | 0.854 |

|                                                                                                          |      |         |          |       |       |
|----------------------------------------------------------------------------------------------------------|------|---------|----------|-------|-------|
| GeSe <sub>0.55</sub> Te <sub>0.45</sub>                                                                  | 530  | 93.97   | 144403.0 | 2.111 | 0.320 |
| Bi <sub>0.9</sub> Ag <sub>0.1</sub> CuSeO                                                                | 523  | 266.00  | 1900.0   | 0.520 | 0.135 |
| Bi <sub>1.2</sub> Sb <sub>0.8</sub> Se <sub>2.82</sub> Cl <sub>0.18</sub>                                | 700  | -190.00 | 15138.0  | 0.620 | 0.617 |
| FeNb <sub>0.86</sub> Hf <sub>0.14</sub> Sb                                                               | 800  | 181.60  | 177519.0 | 4.678 | 1.001 |
| SnS <sub>0.91</sub> Se <sub>0.09</sub>                                                                   | 300  | 203.50  | 128084.0 | 2.300 | 0.686 |
| Sn <sub>0.98</sub> In <sub>0.02</sub> Se                                                                 | 373  | 391.00  | 35.0     | 0.800 | 0.002 |
| Cu <sub>1.7</sub> Se                                                                                     | 295  | 15.35   | 979730.0 | 7.350 | 0.009 |
| Ge <sub>0.85</sub> In <sub>0.05</sub> Pb <sub>0.1</sub> Te                                               | 325  | 199.00  | 33043.0  | 0.973 | 0.437 |
| (SnTe) <sub>20</sub> Sb <sub>2</sub> Te <sub>3</sub>                                                     | 323  | 47.33   | 296943.0 | 4.240 | 0.051 |
| Mg <sub>2</sub> Zn <sub>0.98</sub> Sb <sub>2</sub>                                                       | 300  | 277.63  | 5364.0   | 0.756 | 0.164 |
| Ba <sub>8</sub> Cu <sub>5.18</sub> Si <sub>9.98</sub> Ge <sub>30.85</sub>                                | 809  | -135.50 | 41600.0  | 1.640 | 0.377 |
| K <sub>0.99</sub> Ba <sub>0.01</sub> GaSb <sub>4</sub>                                                   | 416  | -186.40 | 14178.0  | 0.868 | 0.236 |
| In <sub>0.01</sub> Pb <sub>0.99</sub> Te <sub>0.994</sub> l <sub>0.006</sub>                             | 663  | -201.60 | 30625.0  | 1.366 | 0.590 |
| Sr <sub>0.16</sub> Yb <sub>0.03</sub> Co <sub>4</sub> Sb <sub>11.82</sub>                                | 550  | -161.00 | 196364.0 | 3.450 | 0.811 |
| AgCuTe <sub>0.7</sub> Se <sub>0.3</sub>                                                                  | 623  | 250.19  | 11650.0  | 0.432 | 1.052 |
| Rb <sub>2</sub> Bi <sub>8</sub> Se <sub>12.9805</sub>                                                    | 724  | -254.30 | 3890.0   | 0.571 | 0.319 |
| Cu <sub>2</sub> Se                                                                                       | 295  | 46.53   | 282432.0 | 2.323 | 0.078 |
| Ca <sub>0.2</sub> BaGd <sub>1.8</sub> NiO <sub>5</sub>                                                   | 796  | 150.00  | 272.9    | 1.629 | 0.003 |
| Bi <sub>0.42</sub> Sb <sub>1.58</sub> Te <sub>3</sub>                                                    | 423  | 236.19  | 31915.0  | 0.971 | 0.776 |
| SnS <sub>0.94</sub> Se <sub>0.06</sub>                                                                   | 300  | 218.00  | 88600.0  | 2.550 | 0.495 |
| Mg <sub>0.98</sub> Li <sub>0.02</sub> Ge <sub>0.9</sub> Si <sub>0.1</sub>                                | 300  | 229.00  | 13400.0  | 5.292 | 0.040 |
| Sn <sub>0.9</sub> Pb <sub>0.09</sub> Zn <sub>0.01</sub> Se                                               | 573  | 605.36  | 209.0    | 0.641 | 0.069 |
| Gd <sub>2.79</sub> Se <sub>4</sub>                                                                       | 550  | -104.70 | 19937.0  | 1.268 | 0.095 |
| Cu <sub>12</sub> Sb <sub>4</sub> S <sub>13</sub>                                                         | 622  | 173.40  | 15500.0  | 0.514 | 0.563 |
| Nb <sub>0.75</sub> Ta <sub>0.25</sub> CoSn <sub>0.9</sub> Sb <sub>0.1</sub>                              | 430  | -120.00 | 116028.0 | 4.490 | 0.160 |
| Cu <sub>2.05</sub> Cd <sub>0.95</sub> SnSe <sub>4</sub>                                                  | 350  | 143.20  | 12135.0  | 1.953 | 0.045 |
| MgAgSb                                                                                                   | 350  | 188.36  | 40909.0  | 1.000 | 0.508 |
| (Sn <sub>0.8</sub> Ge <sub>0.2</sub> ) <sub>0.91</sub> Mn <sub>0.09</sub> Te                             | 373  | 57.40   | 220164.0 | 2.528 | 0.107 |
| As <sub>2</sub> Te <sub>2</sub> Se                                                                       | 373  | 248.48  | 20.5     | 0.449 | 0.001 |
| Rb <sub>2</sub> Bi <sub>8</sub> Se <sub>12.9415</sub>                                                    | 330  | -167.30 | 11260.0  | 0.753 | 0.138 |
| LaCo <sub>4</sub> Sb <sub>12</sub>                                                                       | 373  | -89.00  | 168675.0 | 3.070 | 0.162 |
| Ca <sub>0.2</sub> BaGd <sub>1.8</sub> NiO <sub>5</sub>                                                   | 693  | 158.82  | 207.0    | 1.660 | 0.002 |
| K <sub>8</sub> Al <sub>8</sub> Ge <sub>38</sub>                                                          | 100  | -7.42   | 47863.0  | 0.885 | 0.000 |
| Cu <sub>2</sub> Se <sub>0.88</sub> S <sub>0.12</sub>                                                     | 750  | 243.05  | 15931.0  | 0.622 | 1.135 |
| Cu <sub>3</sub> Sb <sub>0.975</sub> Ge <sub>0.025</sub> S <sub>4</sub>                                   | 573  | 349.45  | 4348.0   | 0.796 | 0.382 |
| Cu <sub>2</sub> Se <sub>0.94</sub> S <sub>0.06</sub>                                                     | 1000 | 276.16  | 14092.0  | 0.640 | 1.679 |
| (Cu <sub>3</sub> SnS <sub>4</sub> ) <sub>0.875</sub> (Ga <sub>2</sub> Te <sub>3</sub> ) <sub>0.125</sub> | 429  | 96.00   | 80475.0  | 2.192 | 0.145 |
| BiCu <sub>0.925</sub> SeO                                                                                | 323  | 242.45  | 2788.0   | 1.400 | 0.038 |
| CoGeTe                                                                                                   | 825  | -73.70  | 18600.0  | 6.189 | 0.013 |
| AgBi <sub>0.9</sub> Sb <sub>0.1</sub> Se <sub>2</sub>                                                    | 550  | 250.00  | 237.3    | 0.374 | 0.019 |
| Zn <sub>0.85</sub> Cd <sub>0.15</sub> Sc <sub>0.02</sub> O <sub>1.03</sub>                               | 773  | -96.47  | 17857.0  | 4.080 | 0.031 |

|                                                                                             |     |         |          |        |       |
|---------------------------------------------------------------------------------------------|-----|---------|----------|--------|-------|
| CuAgTe <sub>0.5</sub> Se <sub>0.5</sub>                                                     | 403 | 161.17  | 8216.0   | 0.300  | 0.287 |
| Sn <sub>0.91</sub> Mn <sub>0.09</sub> Te                                                    | 524 | 94.53   | 175148.0 | 3.290  | 0.249 |
| Sn <sub>1.03</sub> Se <sub>0.12</sub> Te <sub>0.865</sub> Br <sub>0.015</sub>               | 623 | 103.31  | 140351.0 | 2.434  | 0.413 |
| Rb <sub>2</sub> Bi <sub>8</sub> Se <sub>13</sub>                                            | 526 | -306.00 | 948.0    | 0.439  | 0.106 |
| Ag <sub>1.3</sub> Sb <sub>0.9</sub> Pb <sub>15.7</sub> Te <sub>22.0</sub>                   | 423 | 153.60  | 833.0    | 1.000  | 0.008 |
| Ge <sub>0.55</sub> Pb <sub>0.45</sub> Te <sub>0.8</sub> Se <sub>0.2</sub>                   | 721 | 142.86  | 30000.0  | 1.175  | 0.383 |
| Bi <sub>2</sub> Te <sub>3</sub>                                                             | 572 | -75.32  | 15974.0  | 0.960  | 0.054 |
| CuFeS <sub>2</sub>                                                                          | 100 | -473.30 | 1241.0   | 23.860 | 0.001 |
| Ca <sub>6</sub> Yb <sub>5</sub> Sb <sub>10</sub>                                            | 513 | 11.26   | 51224.0  | 1.397  | 0.002 |
| Sr <sub>0.21</sub> Yb <sub>0.03</sub> Co <sub>4</sub> Sb <sub>12.12</sub>                   | 750 | -175.00 | 186818.0 | 3.640  | 1.179 |
| Cu <sub>5.133</sub> Sn <sub>1.866</sub> S <sub>7</sub>                                      | 617 | 53.98   | 245652.0 | 3.638  | 0.121 |
| Ba <sub>8.07</sub> Cu <sub>4.89</sub> Si <sub>41.03</sub>                                   | 615 | -78.00  | 123300.0 | 2.700  | 0.171 |
| Ca <sub>9</sub> Yb <sub>2</sub> Sb <sub>9</sub> Ge                                          | 327 | -5.48   | 10000.0  | 0.709  | 0.000 |
| Cu <sub>2</sub> Se <sub>0.92</sub> S <sub>0.08</sub>                                        | 550 | 170.33  | 35232.0  | 0.754  | 0.746 |
| As <sub>2</sub> Te <sub>2</sub> Se                                                          | 473 | 228.28  | 86.6     | 0.411  | 0.005 |
| Bi <sub>0.9</sub> Ag <sub>0.1</sub> CuSeO                                                   | 823 | 334.70  | 2500.0   | 0.435  | 0.530 |
| Hf <sub>0.8</sub> Ti <sub>0.2</sub> CoSb <sub>0.8</sub> Sn <sub>0.2</sub>                   | 377 | 175.00  | 58200.0  | 2.800  | 0.240 |
| Ag(Bi <sub>0.85</sub> Nb <sub>0.15</sub> ) <sub>0.9</sub> Sb <sub>0.1</sub> Se <sub>2</sub> | 326 | -71.00  | 47661.0  | 0.661  | 0.119 |
| GeSe <sub>0.85</sub> Te <sub>0.15</sub>                                                     | 320 | 15.04   | 88059.0  | 2.000  | 0.003 |
| Ta <sub>0.84</sub> Ti <sub>0.16</sub> FeSb                                                  | 304 | 105.00  | 409100.0 | 5.493  | 0.250 |
| Zn <sub>2</sub> Cu <sub>3</sub> In <sub>3</sub> Te <sub>8</sub>                             | 373 | 142.30  | 19207.0  | 2.810  | 0.052 |
| Ge <sub>0.85</sub> In <sub>0.05</sub> Pb <sub>0.1</sub> Te                                  | 525 | 239.00  | 34441.0  | 1.027  | 1.006 |
| CaTiO <sub>3</sub>                                                                          | 640 | -264.00 | 2450.0   | 3.460  | 0.032 |
| (Hf <sub>0.3</sub> Zr <sub>0.7</sub> ) <sub>0.88</sub> Nb <sub>0.12</sub> CoSb              | 301 | -114.80 | 79450.0  | 4.150  | 0.070 |
| CoGeTe                                                                                      | 701 | -91.91  | 11702.0  | 5.886  | 0.012 |
| Cu <sub>26</sub> V <sub>2</sub> Ge <sub>4</sub> Sb <sub>2</sub> S <sub>32</sub>             | 497 | 104.20  | 111500.0 | 2.042  | 0.295 |
| (Sn <sub>0.8</sub> Ge <sub>0.2</sub> ) <sub>0.8</sub> Mn <sub>0.2</sub> Te                  | 373 | 73.30   | 142000.0 | 1.984  | 0.142 |
| Ge <sub>0.98</sub> Mn <sub>0.01</sub> Sb <sub>0.01</sub> Te                                 | 298 | 35.16   | 507216.0 | 6.075  | 0.031 |
| TmCuTe <sub>2</sub>                                                                         | 550 | 123.00  | 48859.0  | 1.063  | 0.383 |
| Ag(Bi <sub>0.8</sub> Nb <sub>0.2</sub> ) <sub>0.7</sub> Sb <sub>0.3</sub> Se <sub>2</sub>   | 378 | -184.00 | 10000.0  | 0.886  | 0.144 |
| Nb <sub>0.8</sub> Ta <sub>0.2</sub> CoSn <sub>0.9</sub> Sb <sub>0.1</sub>                   | 924 | -173.90 | 74894.0  | 3.856  | 0.543 |
| Sb <sub>0.05</sub> Ge <sub>0.95</sub> Te                                                    | 823 | 207.41  | 93578.0  | 1.982  | 1.672 |
| Cu <sub>7</sub> P(S <sub>0.65</sub> Se <sub>0.35</sub> ) <sub>6</sub>                       | 325 | 253.25  | 223.0    | 0.237  | 0.020 |
| Hf <sub>0.7</sub> Ti <sub>0.3</sub> CoSb <sub>0.8</sub> Sn <sub>0.2</sub>                   | 473 | 191.00  | 50600.0  | 2.810  | 0.311 |
| Cu <sub>2.2</sub> Sn <sub>0.8</sub> Sb <sub>0.2</sub> Se <sub>3.2</sub>                     | 723 | 111.00  | 96140.0  | 2.200  | 0.389 |
| Ag <sub>2</sub> Se <sub>0.98</sub>                                                          | 361 | -97.82  | 253770.0 | 1.466  | 0.598 |
| Nd <sub>0.15</sub> Co <sub>4</sub> Sb <sub>12</sub>                                         | 800 | -195    | 111000.0 | 1.100  | 1.200 |
| Ba <sub>0.10</sub> La <sub>0.05</sub> Yb <sub>0.10</sub> Co <sub>4</sub> Sb <sub>12</sub>   | 300 | -107    | 300000.0 | 1.300  | 0.300 |
| Cu <sub>3.0</sub> SbSe <sub>4</sub>                                                         | 423 | 454.00  | 2563.0   | 1.630  | 0.137 |
